# Supplementary material for: Effects of bone marrow‐derived mesenchymal stromal cells on gene expression in human alveolar type II cells exposed to TNF‐α, IL‐1β, and IFN‐γ
Source: Physiol Rep. 2018 Aug 22;6(16):e13831. doi: 10.14814/phy2.13831 (PMC6105627; doi:10.14814/phy2.13831)
Supplement: Supplementary file 1 — Table S1. Genes differentially expressed by ATII cells that were exposed to CytoMix alone versus control. Table S2. MSigDB Hallmark gene sets and canonical pathway gene sets upregulated in ATII cells that were exposed to CytoMix alone versus. control. Table S3. MSigDB Hallmark gene sets and canonical pathway gene sets downregulated in ATII cells that were exposed to CytoMix alone versus control. Table S4. Genes differentially expressed by ATII cells that were exposed to MSCs plus CytoMix versus CytoMix alone. Table S5. MSigDB Hallmark gene sets and canonical pathway gene sets upregulated in ATII cells that were exposed to MSCs plus CytoMix versus CytoMix alone. Table S6. TNF‐α signaling genes that are upregulated with CytoMix or MSC exposure. Table S7. MSigDB Hallmark gene sets and canonical pathway gene sets downregulated in ATII cells that were exposed to MSCs and CytoMix compared to CytoMix alone. Table S8. Genes whose expression pattern reverses with MSC exposure in the microarray. [file PHY2-6-e13831-s001.xlsx]

## Sheet: Supplementary Table 1
Genes differentially expressed by ATII cells exposed to CytoMix
Entrez gene	Gene symbol	Description	Mean expression control	Mean expression CytoMix	Log fold change	Fold change	P-value unadjusted	P-value adjusted
1580	CYP4B1	cytochrome P450 family 4 subfamily B member 1 [Source:HGNC Symbol;Acc:HGNC:2644]	11.4	3.88	-7.57	0.00527	2.26e-07	8.16e-05
23767	FLRT3	fibronectin leucine rich transmembrane protein 3 [Source:HGNC Symbol;Acc:HGNC:3762]	9.78	4.02	-5.76	0.0185	5.44e-08	4.35e-05
9022	CLIC3	chloride intracellular channel 3 [Source:HGNC Symbol;Acc:HGNC:2064]	10.4	4.94	-5.5	0.0221	1.64e-08	2.24e-05
361	AQP4	aquaporin 4 [Source:HGNC Symbol;Acc:HGNC:637]	9.03	3.6	-5.43	0.0232	0.000127	0.00242
358	AQP1	aquaporin 1 (Colton blood group) [Source:HGNC Symbol;Acc:HGNC:633]	10.4	5.19	-5.17	0.0279	1.31e-05	0.000662
3851	KRT4	keratin 4 [Source:HGNC Symbol;Acc:HGNC:6441]	9.95	5.06	-4.89	0.0338	0.000429	0.00514
7134	TNNC1	troponin C1, slow skeletal and cardiac type [Source:HGNC Symbol;Acc:HGNC:11943]	9.14	4.31	-4.83	0.0351	4.04e-07	0.000108
216	ALDH1A1	aldehyde dehydrogenase 1 family member A1 [Source:HGNC Symbol;Acc:HGNC:402]	9.1	4.38	-4.72	0.0379	3.95e-05	0.00122
3730	ANOS1	anosmin 1 [Source:HGNC Symbol;Acc:HGNC:6211]	9.58	4.88	-4.7	0.0384	0.000157	0.00278
6699	SPRR1B	small proline rich protein 1B [Source:HGNC Symbol;Acc:HGNC:11260]	9.26	4.57	-4.68	0.039	0.0011	0.00936
286887	KRT6C	keratin 6C [Source:HGNC Symbol;Acc:HGNC:20406]	8.83	4.24	-4.59	0.0415	0.00959	0.0405
3853	KRT6A	keratin 6A [Source:HGNC Symbol;Acc:HGNC:6443]	10.6	6.02	-4.58	0.0417	0.00595	0.0291
6439	SFTPB	surfactant protein B [Source:HGNC Symbol;Acc:HGNC:10801]	13.2	8.69	-4.5	0.0442	2.95e-05	0.00103
23705	CADM1	cell adhesion molecule 1 [Source:HGNC Symbol;Acc:HGNC:5951]	9.99	5.66	-4.34	0.0495	3.98e-06	0.000323
722	C4BPA	complement component 4 binding protein alpha [Source:HGNC Symbol;Acc:HGNC:1325]	11	6.67	-4.3	0.0508	0.000823	0.0078
4477	MSMB	microseminoprotein beta [Source:HGNC Symbol;Acc:HGNC:7372]	8.66	4.38	-4.28	0.0515	0.000294	0.00414
7103	TSPAN8	tetraspanin 8 [Source:HGNC Symbol;Acc:HGNC:11855]	9.13	4.93	-4.2	0.0544	0.000381	0.00483
6707	SPRR3	small proline rich protein 3 [Source:HGNC Symbol;Acc:HGNC:11268]	9.08	4.88	-4.2	0.0543	0.00831	0.0366
11197	WIF1	WNT inhibitory factor 1 [Source:HGNC Symbol;Acc:HGNC:18081]	8.31	4.13	-4.18	0.0551	1.53e-05	0.000702
23089	PEG10	paternally expressed 10 [Source:HGNC Symbol;Acc:HGNC:14005]	9.63	5.45	-4.18	0.055	4.04e-05	0.00123
6578	SLCO2A1	solute carrier organic anion transporter family member 2A1 [Source:HGNC Symbol;Acc:HGNC:10955]	9.28	5.3	-3.98	0.0635	7.51e-05	0.00171
3852	KRT5	keratin 5 [Source:HGNC Symbol;Acc:HGNC:6442]	9.53	5.61	-3.92	0.0661	0.00115	0.00961
55885	LMO3	LIM domain only 3 [Source:HGNC Symbol;Acc:HGNC:6643]	11.2	7.32	-3.87	0.0684	2.53e-07	8.49e-05
79625	NDNF	neuron derived neurotrophic factor [Source:HGNC Symbol;Acc:HGNC:26256]	9.88	6.08	-3.79	0.0721	1.56e-06	0.000201
8991	SELENBP1	selenium binding protein 1 [Source:HGNC Symbol;Acc:HGNC:10719]	8.82	5.09	-3.73	0.0754	0.00152	0.0117
3861	KRT14	keratin 14 [Source:HGNC Symbol;Acc:HGNC:6416]	7.86	4.17	-3.69	0.0775	0.0125	0.0484
79589	RNF128	ring finger protein 128, E3 ubiquitin protein ligase [Source:HGNC Symbol;Acc:HGNC:21153]	9.08	5.43	-3.65	0.0795	4.64e-05	0.00134
84525	HOPX	HOP homeobox [Source:HGNC Symbol;Acc:HGNC:24961]	13.1	9.56	-3.55	0.0854	0.000425	0.00514
6565	SLC15A2	solute carrier family 15 member 2 [Source:HGNC Symbol;Acc:HGNC:10921]	8.06	4.54	-3.52	0.0869	4.13e-06	0.000323
2348	FOLR1	folate receptor 1 [Source:HGNC Symbol;Acc:HGNC:3791]	10.6	7.09	-3.51	0.088	1.68e-06	0.000205
1543	CYP1A1	cytochrome P450 family 1 subfamily A member 1 [Source:HGNC Symbol;Acc:HGNC:2595]	8.81	5.32	-3.49	0.0887	1.65e-05	0.000732
1490	CTGF	connective tissue growth factor [Source:HGNC Symbol;Acc:HGNC:2500]	8.75	5.31	-3.44	0.0924	0.000591	0.00627
8796	SCEL	sciellin [Source:HGNC Symbol;Acc:HGNC:10573]	9.19	5.77	-3.42	0.0936	5.58e-05	0.00148
6441	SFTPD	surfactant protein D [Source:HGNC Symbol;Acc:HGNC:10803]	9.65	6.25	-3.41	0.0943	0.00272	0.0171
25840	METTL7A	methyltransferase like 7A [Source:HGNC Symbol;Acc:HGNC:24550]	8.48	5.08	-3.39	0.0952	1.57e-05	0.000707
3397	ID1	inhibitor of DNA binding 1, HLH protein [Source:HGNC Symbol;Acc:HGNC:5360]	11.1	7.71	-3.39	0.0952	6.34e-06	0.000414
51208	CLDN18	claudin 18 [Source:HGNC Symbol;Acc:HGNC:2039]	8.6	5.23	-3.38	0.0962	7.09e-05	0.00167
6273	S100A2	S100 calcium binding protein A2 [Source:HGNC Symbol;Acc:HGNC:10492]	13	9.66	-3.37	0.0964	0.000271	0.00394
1475	CSTA	cystatin A [Source:HGNC Symbol;Acc:HGNC:2481]	10.5	7.11	-3.35	0.0983	0.00308	0.0187
7045	TGFBI	transforming growth factor beta induced [Source:HGNC Symbol;Acc:HGNC:11771]	9.87	6.54	-3.33	0.0996	2.57e-06	0.000256
2327	FMO2	flavin containing monooxygenase 2 [Source:HGNC Symbol;Acc:HGNC:3770]	7.54	4.28	-3.27	0.104	0.00036	0.00467
79888	LPCAT1	lysophosphatidylcholine acyltransferase 1 [Source:HGNC Symbol;Acc:HGNC:25718]	11.2	7.98	-3.27	0.104	3.4e-06	0.000305
11098	PRSS23	protease, serine 23 [Source:HGNC Symbol;Acc:HGNC:14370]	10.3	7.07	-3.25	0.105	2.34e-06	0.000247
2877	GPX2	glutathione peroxidase 2 [Source:HGNC Symbol;Acc:HGNC:4554]	8.97	5.76	-3.21	0.108	0.00182	0.0131
54959	ODAM	odontogenic, ameloblast asssociated [Source:HGNC Symbol;Acc:HGNC:26043]	6.95	3.75	-3.2	0.109	4.12e-07	0.000108
2941	GSTA4	glutathione S-transferase alpha 4 [Source:HGNC Symbol;Acc:HGNC:4629]	9.41	6.23	-3.18	0.11	1.65e-05	0.000732
8842	PROM1	prominin 1 [Source:HGNC Symbol;Acc:HGNC:9454]	7	3.82	-3.18	0.11	0.00233	0.0153
1286	COL4A4	collagen type IV alpha 4 chain [Source:HGNC Symbol;Acc:HGNC:2206]	8.02	4.85	-3.17	0.111	0.000166	0.00289
81606	LBH	limb bud and heart development [Source:HGNC Symbol;Acc:HGNC:29532]	9.93	6.79	-3.14	0.113	0.000587	0.00627
353189	SLCO4C1	solute carrier organic anion transporter family member 4C1 [Source:HGNC Symbol;Acc:HGNC:23612]	7.88	4.79	-3.09	0.117	0.000195	0.00323
53405	CLIC5	chloride intracellular channel 5 [Source:HGNC Symbol;Acc:HGNC:13517]	9.51	6.45	-3.06	0.12	1.36e-05	0.000668
2823	GPM6A	glycoprotein M6A [Source:HGNC Symbol;Acc:HGNC:4460]	6.6	3.56	-3.04	0.122	1.14e-06	0.000172
56967	C14orf132	chromosome 14 open reading frame 132 [Source:HGNC Symbol;Acc:HGNC:20346]	7.96	4.95	-3.01	0.124	2.11e-05	0.000838
847	CAT	catalase [Source:HGNC Symbol;Acc:HGNC:1516]	11.2	8.27	-2.97	0.128	0.000338	0.0045
2013	EMP2	epithelial membrane protein 2 [Source:HGNC Symbol;Acc:HGNC:3334]	12.2	9.22	-2.96	0.128	2.85e-06	0.000278
1510	CTSE	cathepsin E [Source:HGNC Symbol;Acc:HGNC:2530]	11.2	8.22	-2.95	0.13	2.01e-05	0.000823
8630	HSD17B6	hydroxysteroid 17-beta dehydrogenase 6 [Source:HGNC Symbol;Acc:HGNC:23316]	9.94	7.02	-2.92	0.132	0.000529	0.00587
218	ALDH3A1	aldehyde dehydrogenase 3 family member A1 [Source:HGNC Symbol;Acc:HGNC:405]	7.1	4.22	-2.88	0.136	0.00171	0.0126
894	CCND2	cyclin D2 [Source:HGNC Symbol;Acc:HGNC:1583]	8.51	5.64	-2.87	0.137	0.000152	0.00273
2202	EFEMP1	EGF containing fibulin like extracellular matrix protein 1 [Source:HGNC Symbol;Acc:HGNC:3218]	9.01	6.15	-2.86	0.138	0.0012	0.00994
53836	GPR87	G protein-coupled receptor 87 [Source:HGNC Symbol;Acc:HGNC:4538]	6.93	4.1	-2.83	0.14	0.000215	0.00344
4060	LUM	lumican [Source:HGNC Symbol;Acc:HGNC:6724]	7.84	5.05	-2.79	0.145	0.00545	0.0275
6581	SLC22A3	solute carrier family 22 member 3 [Source:HGNC Symbol;Acc:HGNC:10967]	7.25	4.5	-2.75	0.148	0.00096	0.00857
725	C4BPB	complement component 4 binding protein beta [Source:HGNC Symbol;Acc:HGNC:1328]	7.08	4.4	-2.69	0.155	4.2e-05	0.00127
8869	ST3GAL5	ST3 beta-galactoside alpha-2,3-sialyltransferase 5 [Source:HGNC Symbol;Acc:HGNC:10872]	9.38	6.71	-2.67	0.157	2.19e-07	8.13e-05
2744	GLS	glutaminase [Source:HGNC Symbol;Acc:HGNC:4331]	9.9	7.24	-2.66	0.158	4.45e-06	0.000329
6344	SCTR	secretin receptor [Source:HGNC Symbol;Acc:HGNC:10608]	6.83	4.18	-2.65	0.159	0.00191	0.0135
115207	KCTD12	potassium channel tetramerization domain containing 12 [Source:HGNC Symbol;Acc:HGNC:14678]	8.91	6.28	-2.63	0.162	0.000739	0.00727
5947	RBP1	retinol binding protein 1 [Source:HGNC Symbol;Acc:HGNC:9919]	7.98	5.34	-2.63	0.161	0.00619	0.0298
360	AQP3	aquaporin 3 (Gill blood group) [Source:HGNC Symbol;Acc:HGNC:636]	9.88	7.27	-2.62	0.163	9.81e-05	0.00205
10157	AASS	aminoadipate-semialdehyde synthase [Source:HGNC Symbol;Acc:HGNC:17366]	7.42	4.81	-2.61	0.163	0.0037	0.0209
11005	SPINK5	serine peptidase inhibitor, Kazal type 5 [Source:HGNC Symbol;Acc:HGNC:15464]	6.79	4.19	-2.59	0.166	6.2e-07	0.000129
8000	PSCA	prostate stem cell antigen [Source:HGNC Symbol;Acc:HGNC:9500]	6.35	3.76	-2.58	0.167	0.0011	0.00936
727	C5	complement C5 [Source:HGNC Symbol;Acc:HGNC:1331]	6.96	4.42	-2.55	0.171	0.003	0.0184
2274	FHL2	four and a half LIM domains 2 [Source:HGNC Symbol;Acc:HGNC:3703]	8.66	6.12	-2.54	0.172	0.000121	0.00235
10395	DLC1	DLC1 Rho GTPase activating protein [Source:HGNC Symbol;Acc:HGNC:2897]	9.16	6.64	-2.52	0.175	7.73e-06	0.00046
3400	ID4	inhibitor of DNA binding 4, HLH protein [Source:HGNC Symbol;Acc:HGNC:5363]	7.66	5.14	-2.52	0.175	1.74e-05	0.000762
4680	CEACAM6	carcinoembryonic antigen related cell adhesion molecule 6 [Source:HGNC Symbol;Acc:HGNC:1818]	13.1	10.6	-2.47	0.18	0.00157	0.0119
2627	GATA6	GATA binding protein 6 [Source:HGNC Symbol;Acc:HGNC:4174]	9.07	6.62	-2.46	0.182	2.09e-05	0.000838
5319	PLA2G1B	phospholipase A2 group IB [Source:HGNC Symbol;Acc:HGNC:9030]	6.53	4.07	-2.46	0.181	0.000836	0.00788
8399	PLA2G10	phospholipase A2 group X [Source:HGNC Symbol;Acc:HGNC:9029]	7.15	4.71	-2.44	0.184	0.000154	0.00274
22998	LIMCH1	LIM and calponin homology domains 1 [Source:HGNC Symbol;Acc:HGNC:29191]	8.93	6.5	-2.43	0.186	4.86e-07	0.000121
857	CAV1	caveolin 1 [Source:HGNC Symbol;Acc:HGNC:1527]	12.3	9.86	-2.41	0.188	1.57e-05	0.000707
3983	ABLIM1	actin binding LIM protein 1 [Source:HGNC Symbol;Acc:HGNC:78]	10.3	7.91	-2.4	0.19	3.31e-07	9.45e-05
23224	SYNE2	spectrin repeat containing nuclear envelope protein 2 [Source:HGNC Symbol;Acc:HGNC:17084]	7.21	4.81	-2.4	0.189	6.06e-07	0.000129
50507	NOX4	NADPH oxidase 4 [Source:HGNC Symbol;Acc:HGNC:7891]	5.6	3.2	-2.4	0.189	0.0106	0.0434
948	CD36	CD36 molecule [Source:HGNC Symbol;Acc:HGNC:1663]	5.8	3.41	-2.39	0.191	0.000113	0.00224
1556	CYP2B7P	cytochrome P450 family 2 subfamily B member 7, pseudogene [Source:HGNC Symbol;Acc:HGNC:2616]	8.01	5.63	-2.38	0.192	0.000315	0.00429
1942	EFNA1	ephrin A1 [Source:HGNC Symbol;Acc:HGNC:3221]	10.9	8.48	-2.38	0.192	0.000134	0.0025
23554	TSPAN12	tetraspanin 12 [Source:HGNC Symbol;Acc:HGNC:21641]	9.62	7.25	-2.37	0.193	0.000244	0.00375
10974	ADIRF	adipogenesis regulatory factor [Source:HGNC Symbol;Acc:HGNC:24043]	9.83	7.47	-2.36	0.195	0.00127	0.0103
8910	SGCE	sarcoglycan epsilon [Source:HGNC Symbol;Acc:HGNC:10808]	9.67	7.3	-2.36	0.194	5.75e-09	1.23e-05
177	AGER	advanced glycosylation end-product specific receptor [Source:HGNC Symbol;Acc:HGNC:320]	7.18	4.84	-2.35	0.197	0.000544	0.00597
55081	IFT57	intraflagellar transport 57 [Source:HGNC Symbol;Acc:HGNC:17367]	11.5	9.16	-2.34	0.198	6.34e-06	0.000414
1050	CEBPA	CCAAT/enhancer binding protein alpha [Source:HGNC Symbol;Acc:HGNC:1833]	8.29	5.98	-2.31	0.202	1.59e-06	0.000201
65055	REEP1	receptor accessory protein 1 [Source:HGNC Symbol;Acc:HGNC:25786]	6.47	4.17	-2.3	0.203	0.00167	0.0123
79838	TMC5	transmembrane channel like 5 [Source:HGNC Symbol;Acc:HGNC:22999]	9.91	7.61	-2.3	0.203	1.04e-06	0.000167
2203	FBP1	fructose-bisphosphatase 1 [Source:HGNC Symbol;Acc:HGNC:3606]	10.7	8.45	-2.29	0.205	0.000396	0.00492
224	ALDH3A2	aldehyde dehydrogenase 3 family member A2 [Source:HGNC Symbol;Acc:HGNC:403]	10.1	7.8	-2.29	0.204	1.77e-07	7.11e-05
27122	DKK3	dickkopf WNT signaling pathway inhibitor 3 [Source:HGNC Symbol;Acc:HGNC:2893]	7.49	5.21	-2.28	0.206	0.000434	0.00517
23220	DTX4	deltex E3 ubiquitin ligase 4 [Source:HGNC Symbol;Acc:HGNC:29151]	10.4	8.09	-2.26	0.208	1.83e-05	0.000777
23345	SYNE1	spectrin repeat containing nuclear envelope protein 1 [Source:HGNC Symbol;Acc:HGNC:17089]	6.64	4.39	-2.25	0.21	5.3e-05	0.00144
221395	ADGRF5	adhesion G protein-coupled receptor F5 [Source:HGNC Symbol;Acc:HGNC:19030]	11.2	9	-2.23	0.214	6.18e-08	4.35e-05
2878	GPX3	glutathione peroxidase 3 [Source:HGNC Symbol;Acc:HGNC:4555]	7.94	5.7	-2.23	0.213	0.0011	0.00937
1562	CYP2C18	cytochrome P450 family 2 subfamily C member 18 [Source:HGNC Symbol;Acc:HGNC:2620]	6.78	4.57	-2.22	0.215	0.00206	0.0142
79679	VTCN1	V-set domain containing T-cell activation inhibitor 1 [Source:HGNC Symbol;Acc:HGNC:28873]	6.65	4.44	-2.21	0.217	6.46e-07	0.000129
4900	NRGN	neurogranin [Source:HGNC Symbol;Acc:HGNC:8000]	6.81	4.6	-2.21	0.216	0.0102	0.0422
51316	PLAC8	placenta specific 8 [Source:HGNC Symbol;Acc:HGNC:19254]	7.95	5.77	-2.19	0.22	1.14e-07	6.08e-05
4256	MGP	matrix Gla protein [Source:HGNC Symbol;Acc:HGNC:7060]	6.38	4.19	-2.19	0.219	0.00168	0.0124
3866	KRT15	keratin 15 [Source:HGNC Symbol;Acc:HGNC:6421]	7.83	5.66	-2.18	0.221	0.00622	0.0299
79901	CYBRD1	cytochrome b reductase 1 [Source:HGNC Symbol;Acc:HGNC:20797]	7.23	5.05	-2.18	0.221	6.89e-05	0.00165
8644	AKR1C3	aldo-keto reductase family 1 member C3 [Source:HGNC Symbol;Acc:HGNC:386]	11.9	9.71	-2.18	0.221	9.6e-06	0.000529
11259	FILIP1L	filamin A interacting protein 1 like [Source:HGNC Symbol;Acc:HGNC:24589]	6.59	4.42	-2.17	0.222	0.00301	0.0184
1955	MEGF9	multiple EGF like domains 9 [Source:HGNC Symbol;Acc:HGNC:3234]	8.55	6.38	-2.17	0.222	1.95e-06	0.000225
23321	TRIM2	tripartite motif containing 2 [Source:HGNC Symbol;Acc:HGNC:15974]	7.6	5.44	-2.16	0.224	9.51e-06	0.000528
55024	BANK1	B-cell scaffold protein with ankyrin repeats 1 [Source:HGNC Symbol;Acc:HGNC:18233]	7.31	5.15	-2.16	0.224	0.00174	0.0127
9254	CACNA2D2	calcium voltage-gated channel auxiliary subunit alpha2delta 2 [Source:HGNC Symbol;Acc:HGNC:1400]	7.89	5.74	-2.16	0.224	0.00288	0.0178
79148	MMP28	matrix metallopeptidase 28 [Source:HGNC Symbol;Acc:HGNC:14366]	5.99	3.83	-2.16	0.223	0.000373	0.00478
54585	LZTFL1	leucine zipper transcription factor like 1 [Source:HGNC Symbol;Acc:HGNC:6741]	8.1	5.96	-2.14	0.226	9.15e-06	0.000514
5874	RAB27B	RAB27B, member RAS oncogene family [Source:HGNC Symbol;Acc:HGNC:9767]	8.24	6.11	-2.13	0.229	0.00192	0.0135
9052	GPRC5A	G protein-coupled receptor class C group 5 member A [Source:HGNC Symbol;Acc:HGNC:9836]	12.5	10.4	-2.13	0.229	6.35e-06	0.000414
10162	LPCAT3	lysophosphatidylcholine acyltransferase 3 [Source:HGNC Symbol;Acc:HGNC:30244]	8.42	6.3	-2.12	0.231	2.63e-07	8.49e-05
33	ACADL	acyl-CoA dehydrogenase, long chain [Source:HGNC Symbol;Acc:HGNC:88]	6.56	4.44	-2.11	0.231	3.28e-06	0.000298
3485	IGFBP2	insulin like growth factor binding protein 2 [Source:HGNC Symbol;Acc:HGNC:5471]	7.2	5.1	-2.1	0.234	0.000235	0.00365
7837	PXDN	peroxidasin [Source:HGNC Symbol;Acc:HGNC:14966]	7.03	4.93	-2.1	0.233	0.00228	0.0151
79960	JADE1	jade family PHD finger 1 [Source:HGNC Symbol;Acc:HGNC:30027]	8.22	6.12	-2.1	0.233	0.00047	0.00544
3399	ID3	inhibitor of DNA binding 3, HLH protein [Source:HGNC Symbol;Acc:HGNC:5362]	9.08	7	-2.08	0.237	0.000207	0.00335
5627	PROS1	protein S (alpha) [Source:HGNC Symbol;Acc:HGNC:9456]	8.85	6.78	-2.07	0.239	1.37e-09	5.62e-06
23086	EXPH5	exophilin 5 [Source:HGNC Symbol;Acc:HGNC:30578]	7.9	5.84	-2.06	0.241	2.18e-05	0.000856
2122	MECOM	MDS1 and EVI1 complex locus [Source:HGNC Symbol;Acc:HGNC:3498]	9.53	7.47	-2.06	0.24	0.000266	0.00392
131	ADH7	alcohol dehydrogenase 7 (class IV), mu or sigma polypeptide [Source:HGNC Symbol;Acc:HGNC:256]	6.05	3.99	-2.06	0.239	0.00282	0.0176
4281	MID1	midline 1 [Source:HGNC Symbol;Acc:HGNC:7095]	7.51	5.46	-2.05	0.242	1.03e-07	5.93e-05
3909	LAMA3	laminin subunit alpha 3 [Source:HGNC Symbol;Acc:HGNC:6483]	6.6	4.58	-2.02	0.246	0.00317	0.019
26084	ARHGEF26	Rho guanine nucleotide exchange factor 26 [Source:HGNC Symbol;Acc:HGNC:24490]	5.29	3.28	-2.01	0.249	4.17e-06	0.000323
55366	LGR4	leucine rich repeat containing G protein-coupled receptor 4 [Source:HGNC Symbol;Acc:HGNC:13299]	5.83	3.83	-2.01	0.249	0.000871	0.00811
1808	DPYSL2	dihydropyrimidinase like 2 [Source:HGNC Symbol;Acc:HGNC:3014]	11.6	9.59	-2	0.25	1.31e-05	0.000662
51302	CYP39A1	cytochrome P450 family 39 subfamily A member 1 [Source:HGNC Symbol;Acc:HGNC:17449]	5.15	3.17	-1.99	0.252	0.00163	0.0121
55568	GALNT10	polypeptide N-acetylgalactosaminyltransferase 10 [Source:HGNC Symbol;Acc:HGNC:19873]	8	6.01	-1.99	0.252	0.000161	0.00282
3685	ITGAV	integrin subunit alpha V [Source:HGNC Symbol;Acc:HGNC:6150]	12	10	-1.98	0.254	7.34e-05	0.00169
6817	SULT1A1	sulfotransferase family 1A member 1 [Source:HGNC Symbol;Acc:HGNC:11453]	9.09	7.15	-1.95	0.26	1.2e-06	0.000177
1718	DHCR24	24-dehydrocholesterol reductase [Source:HGNC Symbol;Acc:HGNC:2859]	11.1	9.19	-1.95	0.259	2.51e-06	0.000254
3248	HPGD	hydroxyprostaglandin dehydrogenase 15-(NAD) [Source:HGNC Symbol;Acc:HGNC:5154]	6.14	4.2	-1.95	0.259	0.0053	0.0269
7078	TIMP3	TIMP metallopeptidase inhibitor 3 [Source:HGNC Symbol;Acc:HGNC:11822]	6.82	4.87	-1.95	0.259	0.0026	0.0167
10966	RAB40B	RAB40B, member RAS oncogene family [Source:HGNC Symbol;Acc:HGNC:18284]	6.89	4.94	-1.95	0.258	1.05e-06	0.000167
9413	FAM189A2	family with sequence similarity 189 member A2 [Source:HGNC Symbol;Acc:HGNC:24820]	7.58	5.63	-1.95	0.258	5.61e-06	0.000393
1397	CRIP2	cysteine rich protein 2 [Source:HGNC Symbol;Acc:HGNC:2361]	6.38	4.44	-1.94	0.261	3.19e-06	0.000292
10098	TSPAN5	tetraspanin 5 [Source:HGNC Symbol;Acc:HGNC:17753]	8.45	6.5	-1.94	0.26	8.98e-05	0.00195
4739	NEDD9	neural precursor cell expressed, developmentally down-regulated 9 [Source:HGNC Symbol;Acc:HGNC:7733]	9.66	7.72	-1.94	0.26	2.02e-05	0.000824
3280	HES1	hes family bHLH transcription factor 1 [Source:HGNC Symbol;Acc:HGNC:5192]	7.81	5.88	-1.93	0.263	0.000375	0.0048
3872	KRT17	keratin 17 [Source:HGNC Symbol;Acc:HGNC:6427]	11.3	9.41	-1.93	0.263	0.00786	0.0353
23171	GPD1L	glycerol-3-phosphate dehydrogenase 1 like [Source:HGNC Symbol;Acc:HGNC:28956]	8.55	6.62	-1.93	0.262	0.000284	0.00402
79413	ZBED2	zinc finger BED-type containing 2 [Source:HGNC Symbol;Acc:HGNC:20710]	6.4	4.47	-1.93	0.262	0.00184	0.0131
1646	AKR1C2	aldo-keto reductase family 1 member C2 [Source:HGNC Symbol;Acc:HGNC:385]	11.4	9.43	-1.92	0.264	0.00737	0.0339
23221	RHOBTB2	Rho related BTB domain containing 2 [Source:HGNC Symbol;Acc:HGNC:18756]	7.67	5.76	-1.91	0.266	1.91e-05	0.000787
94239	H2AFV	H2A histone family member V [Source:HGNC Symbol;Acc:HGNC:20664]	8.5	6.58	-1.91	0.266	3.27e-07	9.45e-05
2043	EPHA4	EPH receptor A4 [Source:HGNC Symbol;Acc:HGNC:3388]	6.68	4.77	-1.91	0.265	0.00179	0.0129
4781	NFIB	nuclear factor I B [Source:HGNC Symbol;Acc:HGNC:7785]	8.14	6.22	-1.91	0.265	5.6e-07	0.000129
5176	SERPINF1	serpin family F member 1 [Source:HGNC Symbol;Acc:HGNC:8824]	6.95	5.06	-1.89	0.27	9.82e-05	0.00205
8470	SORBS2	sorbin and SH3 domain containing 2 [Source:HGNC Symbol;Acc:HGNC:24098]	6.72	4.83	-1.89	0.269	1.18e-05	0.000612
51449	PCYOX1	prenylcysteine oxidase 1 [Source:HGNC Symbol;Acc:HGNC:20588]	8.71	6.83	-1.88	0.271	5.28e-06	0.000372
79083	MLPH	melanophilin [Source:HGNC Symbol;Acc:HGNC:29643]	9.8	7.91	-1.88	0.271	4.97e-05	0.0014
11012	KLK11	kallikrein related peptidase 11 [Source:HGNC Symbol;Acc:HGNC:6359]	7.2	5.34	-1.86	0.276	1.44e-06	0.00019
10396	ATP8A1	ATPase phospholipid transporting 8A1 [Source:HGNC Symbol;Acc:HGNC:13531]	5.55	3.68	-1.86	0.275	0.00551	0.0277
56922	MCCC1	methylcrotonoyl-CoA carboxylase 1 [Source:HGNC Symbol;Acc:HGNC:6936]	8.4	6.54	-1.86	0.275	0.00123	0.01
8612	PLPP2	phospholipid phosphatase 2 [Source:HGNC Symbol;Acc:HGNC:9230]	7.23	5.37	-1.86	0.275	0.000584	0.00626
27303	RBMS3	RNA binding motif single stranded interacting protein 3 [Source:HGNC Symbol;Acc:HGNC:13427]	6.33	4.48	-1.85	0.277	0.00303	0.0185
79991	STN1	STN1, CST complex subunit [Source:HGNC Symbol;Acc:HGNC:26200]	9.63	7.78	-1.85	0.277	0.000109	0.00219
79170	PRR15L	proline rich 15 like [Source:HGNC Symbol;Acc:HGNC:28149]	6.68	4.82	-1.85	0.276	3.97e-05	0.00122
10217	CTDSPL	CTD small phosphatase like [Source:HGNC Symbol;Acc:HGNC:16890]	8.27	6.44	-1.83	0.281	6.38e-08	4.35e-05
56034	PDGFC	platelet derived growth factor C [Source:HGNC Symbol;Acc:HGNC:8801]	9.07	7.27	-1.81	0.286	0.000502	0.00569
29995	LMCD1	LIM and cysteine rich domains 1 [Source:HGNC Symbol;Acc:HGNC:6633]	7.18	5.38	-1.8	0.287	5.81e-05	0.00152
7057	THBS1	thrombospondin 1 [Source:HGNC Symbol;Acc:HGNC:11785]	8.42	6.61	-1.8	0.287	0.000263	0.00389
4040	LRP6	LDL receptor related protein 6 [Source:HGNC Symbol;Acc:HGNC:6698]	7.5	5.7	-1.79	0.288	8.55e-07	0.00015
5349	FXYD3	FXYD domain containing ion transport regulator 3 [Source:HGNC Symbol;Acc:HGNC:4027]	9.49	7.72	-1.78	0.292	2.18e-05	0.000856
51442	VGLL1	vestigial like family member 1 [Source:HGNC Symbol;Acc:HGNC:20985]	5.47	3.7	-1.77	0.293	0.00424	0.023
858	CAV2	caveolin 2 [Source:HGNC Symbol;Acc:HGNC:1528]	11.4	9.66	-1.76	0.296	1.11e-05	0.000588
27346	TMEM97	transmembrane protein 97 [Source:HGNC Symbol;Acc:HGNC:28106]	8.82	7.06	-1.76	0.295	0.000356	0.00463
347902	AMIGO2	adhesion molecule with Ig like domain 2 [Source:HGNC Symbol;Acc:HGNC:24073]	11.3	9.58	-1.75	0.298	0.00648	0.0309
6414	SELENOP	selenoprotein P [Source:HGNC Symbol;Acc:HGNC:10751]	11.3	9.52	-1.75	0.297	0.000427	0.00514
1836	SLC26A2	solute carrier family 26 member 2 [Source:HGNC Symbol;Acc:HGNC:10994]	6.78	5.02	-1.75	0.296	9.99e-07	0.000166
5654	HTRA1	HtrA serine peptidase 1 [Source:HGNC Symbol;Acc:HGNC:9476]	6.8	5.09	-1.71	0.306	0.00163	0.0122
5827	PXMP2	peroxisomal membrane protein 2 [Source:HGNC Symbol;Acc:HGNC:9716]	7.34	5.63	-1.71	0.306	6.57e-07	0.000129
9121	SLC16A5	solute carrier family 16 member 5 [Source:HGNC Symbol;Acc:HGNC:10926]	7.27	5.56	-1.71	0.306	5.68e-06	0.000394
23266	ADGRL2	adhesion G protein-coupled receptor L2 [Source:HGNC Symbol;Acc:HGNC:18582]	6.99	5.31	-1.68	0.312	0.00143	0.0111
4815	NINJ2	ninjurin 2 [Source:HGNC Symbol;Acc:HGNC:7825]	8	6.32	-1.68	0.311	0.00245	0.016
4775	NFATC3	nuclear factor of activated T-cells 3 [Source:HGNC Symbol;Acc:HGNC:7777]	7.83	6.16	-1.67	0.314	8.13e-05	0.00182
54463	RETREG1	reticulophagy regulator 1 [Source:HGNC Symbol;Acc:HGNC:25964]	8.15	6.49	-1.66	0.317	0.00309	0.0187
27034	ACAD8	acyl-CoA dehydrogenase family member 8 [Source:HGNC Symbol;Acc:HGNC:87]	7.48	5.81	-1.66	0.316	3.24e-05	0.00108
362	AQP5	aquaporin 5 [Source:HGNC Symbol;Acc:HGNC:638]	6.39	4.74	-1.65	0.319	1.88e-05	0.000782
27075	TSPAN13	tetraspanin 13 [Source:HGNC Symbol;Acc:HGNC:21643]	13.1	11.4	-1.65	0.318	1.54e-05	0.000702
9912	ARHGAP44	Rho GTPase activating protein 44 [Source:HGNC Symbol;Acc:HGNC:29096]	7.34	5.69	-1.65	0.318	2.06e-06	0.000228
51562	MBIP	MAP3K12 binding inhibitory protein 1 [Source:HGNC Symbol;Acc:HGNC:20427]	9.28	7.64	-1.64	0.321	1.27e-05	0.000649
5783	PTPN13	protein tyrosine phosphatase, non-receptor type 13 [Source:HGNC Symbol;Acc:HGNC:9646]	6.72	5.09	-1.63	0.323	0.00126	0.0102
55357	TBC1D2	TBC1 domain family member 2 [Source:HGNC Symbol;Acc:HGNC:18026]	7.25	5.63	-1.62	0.326	3.43e-05	0.0011
64236	PDLIM2	PDZ and LIM domain 2 [Source:HGNC Symbol;Acc:HGNC:13992]	9.07	7.45	-1.62	0.324	0.001	0.00881
9338	TCEAL1	transcription elongation factor A like 1 [Source:HGNC Symbol;Acc:HGNC:11616]	9.01	7.41	-1.61	0.329	1.19e-06	0.000177
10123	ARL4C	ADP ribosylation factor like GTPase 4C [Source:HGNC Symbol;Acc:HGNC:698]	7.96	6.36	-1.61	0.328	3.59e-06	0.000312
7051	TGM1	transglutaminase 1 [Source:HGNC Symbol;Acc:HGNC:11777]	6.72	5.11	-1.61	0.328	0.000907	0.00835
64359	NXN	nucleoredoxin [Source:HGNC Symbol;Acc:HGNC:18008]	10.2	8.63	-1.6	0.331	0.000874	0.00812
51110	LACTB2	lactamase beta 2 [Source:HGNC Symbol;Acc:HGNC:18512]	9.9	8.31	-1.59	0.331	0.000489	0.00559
6091	ROBO1	roundabout guidance receptor 1 [Source:HGNC Symbol;Acc:HGNC:10249]	7.03	5.45	-1.58	0.335	0.00021	0.00339
7080	NKX2-1	NK2 homeobox 1 [Source:HGNC Symbol;Acc:HGNC:11825]	8.04	6.46	-1.58	0.335	1.84e-06	0.000219
3772	KCNJ15	potassium voltage-gated channel subfamily J member 15 [Source:HGNC Symbol;Acc:HGNC:6261]	8.35	6.77	-1.58	0.334	0.00282	0.0176
1466	CSRP2	cysteine and glycine rich protein 2 [Source:HGNC Symbol;Acc:HGNC:2470]	8.22	6.66	-1.57	0.338	0.0103	0.0425
83989	FAM172A	family with sequence similarity 172 member A [Source:HGNC Symbol;Acc:HGNC:25365]	7.66	6.09	-1.57	0.338	7.08e-06	0.000435
54361	WNT4	Wnt family member 4 [Source:HGNC Symbol;Acc:HGNC:12783]	6.35	4.78	-1.57	0.337	0.000534	0.0059
7026	NR2F2	nuclear receptor subfamily 2 group F member 2 [Source:HGNC Symbol;Acc:HGNC:7976]	6.07	4.5	-1.57	0.336	8.64e-06	0.000502
51367	POP5	POP5 homolog, ribonuclease P/MRP subunit [Source:HGNC Symbol;Acc:HGNC:17689]	8.63	7.07	-1.56	0.34	5.8e-08	4.35e-05
54800	KLHL24	kelch like family member 24 [Source:HGNC Symbol;Acc:HGNC:25947]	8.39	6.83	-1.56	0.34	0.011	0.0443
23471	TRAM1	translocation associated membrane protein 1 [Source:HGNC Symbol;Acc:HGNC:20568]	12.5	10.9	-1.56	0.339	9.12e-06	0.000514
3170	FOXA2	forkhead box A2 [Source:HGNC Symbol;Acc:HGNC:5022]	7.9	6.35	-1.55	0.342	8.52e-05	0.00189
51053	GMNN	geminin, DNA replication inhibitor [Source:HGNC Symbol;Acc:HGNC:17493]	8.04	6.49	-1.55	0.342	6.87e-05	0.00165
8436	CAVIN2	caveolae associated protein 2 [Source:HGNC Symbol;Acc:HGNC:10690]	5.51	3.96	-1.55	0.342	0.00108	0.00933
253782	CERS6	ceramide synthase 6 [Source:HGNC Symbol;Acc:HGNC:23826]	7.63	6.08	-1.55	0.341	6.94e-07	0.000129
2729	GCLC	glutamate-cysteine ligase catalytic subunit [Source:HGNC Symbol;Acc:HGNC:4311]	8.42	6.87	-1.55	0.341	0.00759	0.0345
6382	SDC1	syndecan 1 [Source:HGNC Symbol;Acc:HGNC:10658]	10.3	8.74	-1.55	0.341	3.14e-06	0.000292
3386	ICAM4	intercellular adhesion molecule 4 (Landsteiner-Wiener blood group) [Source:HGNC Symbol;Acc:HGNC:5347]	6.56	5.02	-1.54	0.345	0.00031	0.00425
9060	PAPSS2	3'-phosphoadenosine 5'-phosphosulfate synthase 2 [Source:HGNC Symbol;Acc:HGNC:8604]	9.27	7.73	-1.54	0.345	0.000487	0.00558
54885	TBC1D8B	TBC1 domain family member 8B [Source:HGNC Symbol;Acc:HGNC:24715]	5.93	4.39	-1.54	0.344	5.97e-05	0.00153
9915	ARNT2	aryl hydrocarbon receptor nuclear translocator 2 [Source:HGNC Symbol;Acc:HGNC:16876]	5.53	3.98	-1.54	0.343	0.00245	0.016
5791	PTPRE	protein tyrosine phosphatase, receptor type E [Source:HGNC Symbol;Acc:HGNC:9669]	9.29	7.76	-1.53	0.347	0.000525	0.00586
4147	MATN2	matrilin 2 [Source:HGNC Symbol;Acc:HGNC:6908]	5.17	3.65	-1.52	0.349	0.000245	0.00375
10568	SLC34A2	solute carrier family 34 member 2 [Source:HGNC Symbol;Acc:HGNC:11020]	12.3	10.8	-1.52	0.348	0.000962	0.00858
5412	UBL3	ubiquitin like 3 [Source:HGNC Symbol;Acc:HGNC:12504]	9.15	7.64	-1.51	0.352	4.16e-06	0.000323
10516	FBLN5	fibulin 5 [Source:HGNC Symbol;Acc:HGNC:3602]	6.34	4.83	-1.51	0.351	0.00548	0.0276
10351	ABCA8	ATP binding cassette subfamily A member 8 [Source:HGNC Symbol;Acc:HGNC:38]	5.47	3.97	-1.5	0.354	2.2e-05	0.000861
5270	SERPINE2	serpin family E member 2 [Source:HGNC Symbol;Acc:HGNC:8951]	7.03	5.53	-1.5	0.354	0.00315	0.019
79682	CENPU	centromere protein U [Source:HGNC Symbol;Acc:HGNC:21348]	5.52	4.02	-1.5	0.353	0.00169	0.0125
23270	TSPYL4	TSPY like 4 [Source:HGNC Symbol;Acc:HGNC:21559]	8.01	6.52	-1.49	0.357	0.000429	0.00514
4319	MMP10	matrix metallopeptidase 10 [Source:HGNC Symbol;Acc:HGNC:7156]	7.04	5.55	-1.49	0.357	0.0118	0.0465
55353	LAPTM4B	lysosomal protein transmembrane 4 beta [Source:HGNC Symbol;Acc:HGNC:13646]	11.4	9.9	-1.49	0.356	0.000481	0.00553
64116	SLC39A8	solute carrier family 39 member 8 [Source:HGNC Symbol;Acc:HGNC:20862]	9.67	8.18	-1.49	0.356	0.000101	0.00209
214	ALCAM	activated leukocyte cell adhesion molecule [Source:HGNC Symbol;Acc:HGNC:400]	10.1	8.64	-1.48	0.359	6.89e-07	0.000129
6098	ROS1	ROS proto-oncogene 1, receptor tyrosine kinase [Source:HGNC Symbol;Acc:HGNC:10261]	5.73	4.25	-1.48	0.359	0.000116	0.0023
2001	ELF5	E74 like ETS transcription factor 5 [Source:HGNC Symbol;Acc:HGNC:3320]	5.13	3.65	-1.48	0.358	0.00121	0.00995
54566	EPB41L4B	erythrocyte membrane protein band 4.1 like 4B [Source:HGNC Symbol;Acc:HGNC:19818]	9.4	7.91	-1.48	0.357	0.00124	0.0101
22841	RAB11FIP2	RAB11 family interacting protein 2 [Source:HGNC Symbol;Acc:HGNC:29152]	8.41	6.95	-1.47	0.362	1.65e-05	0.000732
55970	GNG12	G protein subunit gamma 12 [Source:HGNC Symbol;Acc:HGNC:19663]	10.3	8.83	-1.47	0.362	0.00106	0.00918
26999	CYFIP2	cytoplasmic FMR1 interacting protein 2 [Source:HGNC Symbol;Acc:HGNC:13760]	7.21	5.75	-1.47	0.361	6.54e-05	0.00161
1528	CYB5A	cytochrome b5 type A [Source:HGNC Symbol;Acc:HGNC:2570]	12.9	11.5	-1.46	0.364	0.000531	0.00589
3625	INHBB	inhibin beta B subunit [Source:HGNC Symbol;Acc:HGNC:6067]	5.85	4.39	-1.46	0.363	0.00187	0.0133
5094	PCBP2	poly(rC) binding protein 2 [Source:HGNC Symbol;Acc:HGNC:8648]	7.98	6.52	-1.46	0.363	0.000423	0.00512
8324	FZD7	frizzled class receptor 7 [Source:HGNC Symbol;Acc:HGNC:4045]	6.02	4.55	-1.46	0.363	0.000201	0.0033
1287	COL4A5	collagen type IV alpha 5 chain [Source:HGNC Symbol;Acc:HGNC:2207]	6.35	4.88	-1.46	0.362	8.08e-06	0.000476
22836	RHOBTB3	Rho related BTB domain containing 3 [Source:HGNC Symbol;Acc:HGNC:18757]	8.53	7.09	-1.45	0.367	0.000667	0.00682
1474	CST6	cystatin E/M [Source:HGNC Symbol;Acc:HGNC:2478]	10	8.56	-1.45	0.366	0.00408	0.0223
92086	GGTLC1	gamma-glutamyltransferase light chain 1 [Source:HGNC Symbol;Acc:HGNC:16437]	6.83	5.38	-1.45	0.366	0.000454	0.00533
6505	SLC1A1	solute carrier family 1 member 1 [Source:HGNC Symbol;Acc:HGNC:10939]	5.57	4.11	-1.45	0.365	0.0129	0.0493
55227	LRRC1	leucine rich repeat containing 1 [Source:HGNC Symbol;Acc:HGNC:14307]	8	6.56	-1.44	0.369	0.0032	0.0191
23333	DPY19L1	dpy-19 like 1 [Source:HGNC Symbol;Acc:HGNC:22205]	9	7.58	-1.43	0.372	1.47e-05	0.000692
55607	PPP1R9A	protein phosphatase 1 regulatory subunit 9A [Source:HGNC Symbol;Acc:HGNC:14946]	7.4	5.97	-1.43	0.371	4.77e-05	0.00136
79818	ZNF552	zinc finger protein 552 [Source:HGNC Symbol;Acc:HGNC:26135]	6.94	5.51	-1.43	0.371	0.0013	0.0104
85458	DIXDC1	DIX domain containing 1 [Source:HGNC Symbol;Acc:HGNC:23695]	5.86	4.43	-1.43	0.371	8.77e-06	0.000503
376267	RAB15	RAB15, member RAS oncogene family [Source:HGNC Symbol;Acc:HGNC:20150]	8.94	7.51	-1.43	0.37	0.000325	0.00439
283537	SLC46A3	solute carrier family 46 member 3 [Source:HGNC Symbol;Acc:HGNC:27501]	7.48	6.06	-1.42	0.374	0.00807	0.0359
10424	PGRMC2	progesterone receptor membrane component 2 [Source:HGNC Symbol;Acc:HGNC:16089]	7.55	6.14	-1.41	0.377	4.91e-05	0.00139
196	AHR	aryl hydrocarbon receptor [Source:HGNC Symbol;Acc:HGNC:348]	11	9.6	-1.4	0.38	0.000619	0.00644
5446	PON3	paraoxonase 3 [Source:HGNC Symbol;Acc:HGNC:9206]	8.33	6.94	-1.4	0.38	0.00969	0.0408
6342	SCP2	sterol carrier protein 2 [Source:HGNC Symbol;Acc:HGNC:10606]	11.2	9.83	-1.4	0.38	1.12e-06	0.000172
891	CCNB1	cyclin B1 [Source:HGNC Symbol;Acc:HGNC:1579]	6.22	4.83	-1.4	0.38	0.00834	0.0367
29091	STXBP6	syntaxin binding protein 6 [Source:HGNC Symbol;Acc:HGNC:19666]	6.07	4.67	-1.4	0.379	0.00175	0.0128
64110	MAGEF1	MAGE family member F1 [Source:HGNC Symbol;Acc:HGNC:29639]	8.76	7.36	-1.4	0.379	3.51e-06	0.000312
2982	GUCY1A3	guanylate cyclase 1 soluble subunit alpha [Source:HGNC Symbol;Acc:HGNC:4685]	6.69	5.29	-1.4	0.378	0.00868	0.0377
6604	SMARCD3	SWI/SNF related, matrix associated, actin dependent regulator of chromatin, subfamily d, member 3 [Source:HGNC Symbol;Acc:HGNC:11108]	6.65	5.25	-1.4	0.378	0.000144	0.00263
26586	CKAP2	cytoskeleton associated protein 2 [Source:HGNC Symbol;Acc:HGNC:1990]	6.96	5.56	-1.39	0.381	2.01e-06	0.000225
5530	PPP3CA	protein phosphatase 3 catalytic subunit alpha [Source:HGNC Symbol;Acc:HGNC:9314]	9.8	8.41	-1.39	0.38	2.97e-05	0.00103
256987	SERINC5	serine incorporator 5 [Source:HGNC Symbol;Acc:HGNC:18825]	10.4	9.06	-1.38	0.385	4.1e-05	0.00125
5980	REV3L	REV3 like, DNA directed polymerase zeta catalytic subunit [Source:HGNC Symbol;Acc:HGNC:9968]	6.65	5.27	-1.38	0.385	9.43e-05	0.002
51760	SYT17	synaptotagmin 17 [Source:HGNC Symbol;Acc:HGNC:24119]	6.62	5.24	-1.38	0.384	7.55e-05	0.00171
5480	PPIC	peptidylprolyl isomerase C [Source:HGNC Symbol;Acc:HGNC:9256]	9.92	8.53	-1.38	0.383	3.16e-07	9.45e-05
27165	GLS2	glutaminase 2 [Source:HGNC Symbol;Acc:HGNC:29570]	6.8	5.43	-1.37	0.386	0.00854	0.0373
10810	WASF3	WAS protein family member 3 [Source:HGNC Symbol;Acc:HGNC:12734]	7.49	6.14	-1.35	0.393	0.00426	0.023
22837	COBLL1	cordon-bleu WH2 repeat protein like 1 [Source:HGNC Symbol;Acc:HGNC:23571]	6.59	5.24	-1.35	0.393	0.00491	0.0255
29116	MYLIP	myosin regulatory light chain interacting protein [Source:HGNC Symbol;Acc:HGNC:21155]	6.82	5.48	-1.35	0.393	0.0056	0.028
10231	RCAN2	regulator of calcineurin 2 [Source:HGNC Symbol;Acc:HGNC:3041]	8.34	7	-1.34	0.395	0.00919	0.0394
10753	CAPN9	calpain 9 [Source:HGNC Symbol;Acc:HGNC:1486]	5.53	4.19	-1.34	0.395	0.000199	0.00328
23012	STK38L	serine/threonine kinase 38 like [Source:HGNC Symbol;Acc:HGNC:17848]	7.67	6.33	-1.34	0.395	0.0028	0.0175
5154	PDGFA	platelet derived growth factor subunit A [Source:HGNC Symbol;Acc:HGNC:8799]	7.77	6.44	-1.34	0.395	0.00454	0.0241
55148	UBR7	ubiquitin protein ligase E3 component n-recognin 7 (putative) [Source:HGNC Symbol;Acc:HGNC:20344]	7.52	6.18	-1.34	0.395	1.44e-05	0.000686
6744	SSFA2	sperm specific antigen 2 [Source:HGNC Symbol;Acc:HGNC:11319]	10.1	8.76	-1.34	0.395	0.000165	0.00287
7108	TM7SF2	transmembrane 7 superfamily member 2 [Source:HGNC Symbol;Acc:HGNC:11863]	7.57	6.23	-1.34	0.395	5.04e-06	0.000365
9194	SLC16A7	solute carrier family 16 member 7 [Source:HGNC Symbol;Acc:HGNC:10928]	5.99	4.65	-1.34	0.394	7.47e-05	0.00171
83869	NA	NA	5.73	4.4	-1.33	0.398	0.00404	0.0222
57758	SCUBE2	signal peptide, CUB domain and EGF like domain containing 2 [Source:HGNC Symbol;Acc:HGNC:30425]	5.95	4.62	-1.33	0.397	0.0129	0.0494
79090	TRAPPC6A	trafficking protein particle complex 6A [Source:HGNC Symbol;Acc:HGNC:23069]	7.82	6.49	-1.33	0.397	0.00305	0.0185
9182	RASSF9	Ras association domain family member 9 [Source:HGNC Symbol;Acc:HGNC:15739]	5.92	4.59	-1.33	0.397	6.01e-08	4.35e-05
991	CDC20	cell division cycle 20 [Source:HGNC Symbol;Acc:HGNC:1723]	5.43	4.1	-1.33	0.397	0.00877	0.0381
2879	GPX4	glutathione peroxidase 4 [Source:HGNC Symbol;Acc:HGNC:4556]	11.7	10.4	-1.32	0.401	5.9e-05	0.00153
7466	WFS1	wolframin ER transmembrane glycoprotein [Source:HGNC Symbol;Acc:HGNC:12762]	7.94	6.63	-1.31	0.404	0.000586	0.00627
5493	PPL	periplakin [Source:HGNC Symbol;Acc:HGNC:9273]	7.75	6.43	-1.31	0.403	7.29e-05	0.00168
4208	MEF2C	myocyte enhancer factor 2C [Source:HGNC Symbol;Acc:HGNC:6996]	6.58	5.28	-1.3	0.408	0.000847	0.00796
1512	CTSH	cathepsin H [Source:HGNC Symbol;Acc:HGNC:2535]	12.5	11.2	-1.3	0.407	0.0014	0.011
175	AGA	aspartylglucosaminidase [Source:HGNC Symbol;Acc:HGNC:318]	7.06	5.76	-1.3	0.407	0.00075	0.00734
23362	PSD3	pleckstrin and Sec7 domain containing 3 [Source:HGNC Symbol;Acc:HGNC:19093]	7.29	6	-1.3	0.407	0.000676	0.00688
8309	ACOX2	acyl-CoA oxidase 2 [Source:HGNC Symbol;Acc:HGNC:120]	6.02	4.72	-1.3	0.407	2.44e-05	0.000908
2139	EYA2	EYA transcriptional coactivator and phosphatase 2 [Source:HGNC Symbol;Acc:HGNC:3520]	4.89	3.59	-1.3	0.406	0.00598	0.0291
23179	RGL1	ral guanine nucleotide dissociation stimulator like 1 [Source:HGNC Symbol;Acc:HGNC:30281]	8.14	6.84	-1.3	0.406	0.0035	0.0203
6431	SRSF6	serine and arginine rich splicing factor 6 [Source:HGNC Symbol;Acc:HGNC:10788]	8.85	7.55	-1.3	0.406	0.000105	0.00213
39	ACAT2	acetyl-CoA acetyltransferase 2 [Source:HGNC Symbol;Acc:HGNC:94]	9.94	8.65	-1.29	0.41	0.00332	0.0196
51090	PLLP	plasmolipin [Source:HGNC Symbol;Acc:HGNC:18553]	9.59	8.31	-1.29	0.41	0.00111	0.00947
27244	SESN1	sestrin 1 [Source:HGNC Symbol;Acc:HGNC:21595]	6.87	5.58	-1.29	0.409	0.000821	0.00779
573	BAG1	BCL2 associated athanogene 1 [Source:HGNC Symbol;Acc:HGNC:937]	9.07	7.78	-1.29	0.409	5.27e-07	0.000124
7086	TKT	transketolase [Source:HGNC Symbol;Acc:HGNC:11834]	11.4	10.1	-1.29	0.409	3.56e-05	0.00113
54453	RIN2	Ras and Rab interactor 2 [Source:HGNC Symbol;Acc:HGNC:18750]	10	8.73	-1.29	0.408	0.000118	0.00231
7267	TTC3	tetratricopeptide repeat domain 3 [Source:HGNC Symbol;Acc:HGNC:12393]	8.58	7.29	-1.29	0.408	2.11e-05	0.000838
27131	SNX5	sorting nexin 5 [Source:HGNC Symbol;Acc:HGNC:14969]	8.85	7.57	-1.28	0.413	0.000157	0.00278
25959	KANK2	KN motif and ankyrin repeat domains 2 [Source:HGNC Symbol;Acc:HGNC:29300]	6.83	5.55	-1.28	0.412	0.00025	0.0038
4199	ME1	malic enzyme 1 [Source:HGNC Symbol;Acc:HGNC:6983]	10.2	8.88	-1.28	0.412	4.31e-06	0.000325
4582	MUC1	mucin 1, cell surface associated [Source:HGNC Symbol;Acc:HGNC:7508]	11.1	9.82	-1.28	0.412	0.000693	0.00701
570	BAAT	bile acid-CoA:amino acid N-acyltransferase [Source:HGNC Symbol;Acc:HGNC:932]	6.37	5.09	-1.28	0.412	0.00728	0.0335
6415	SELENOW	selenoprotein W [Source:HGNC Symbol;Acc:HGNC:10752]	9.9	8.62	-1.28	0.412	8.35e-05	0.00186
8034	SLC25A16	solute carrier family 25 member 16 [Source:HGNC Symbol;Acc:HGNC:10986]	6.65	5.37	-1.28	0.412	0.000202	0.0033
7915	ALDH5A1	aldehyde dehydrogenase 5 family member A1 [Source:HGNC Symbol;Acc:HGNC:408]	6.7	5.42	-1.28	0.411	0.00376	0.0211
81575	APOLD1	apolipoprotein L domain containing 1 [Source:HGNC Symbol;Acc:HGNC:25268]	5.57	4.28	-1.28	0.411	0.00331	0.0196
871	SERPINH1	serpin family H member 1 [Source:HGNC Symbol;Acc:HGNC:1546]	8.57	7.28	-1.28	0.411	0.00108	0.00929
977	CD151	CD151 molecule (Raph blood group) [Source:HGNC Symbol;Acc:HGNC:1630]	9.42	8.14	-1.28	0.411	0.00546	0.0275
10276	NET1	neuroepithelial cell transforming 1 [Source:HGNC Symbol;Acc:HGNC:14592]	9.31	8.03	-1.27	0.414	5.57e-05	0.00148
6720	SREBF1	sterol regulatory element binding transcription factor 1 [Source:HGNC Symbol;Acc:HGNC:11289]	7.54	6.27	-1.27	0.414	4.61e-05	0.00134
8821	INPP4B	inositol polyphosphate-4-phosphatase type II B [Source:HGNC Symbol;Acc:HGNC:6075]	5.1	3.82	-1.27	0.414	0.013	0.0494
56944	OLFML3	olfactomedin like 3 [Source:HGNC Symbol;Acc:HGNC:24956]	5.66	4.4	-1.26	0.418	0.00197	0.0138
5775	PTPN4	protein tyrosine phosphatase, non-receptor type 4 [Source:HGNC Symbol;Acc:HGNC:9656]	7.19	5.93	-1.26	0.418	3.32e-06	0.0003
3033	HADH	hydroxyacyl-CoA dehydrogenase [Source:HGNC Symbol;Acc:HGNC:4799]	9	7.73	-1.26	0.417	6.84e-05	0.00165
55825	PECR	peroxisomal trans-2-enoyl-CoA reductase [Source:HGNC Symbol;Acc:HGNC:18281]	6.36	5.09	-1.26	0.417	3.8e-05	0.00118
23741	EID1	EP300 interacting inhibitor of differentiation 1 [Source:HGNC Symbol;Acc:HGNC:1191]	9.51	8.24	-1.26	0.416	1.8e-06	0.000216
22824	HSPA4L	heat shock protein family A (Hsp70) member 4 like [Source:HGNC Symbol;Acc:HGNC:17041]	4.89	3.64	-1.25	0.421	0.00755	0.0344
5152	PDE9A	phosphodiesterase 9A [Source:HGNC Symbol;Acc:HGNC:8795]	5.83	4.58	-1.25	0.421	3.35e-05	0.00109
5468	PPARG	peroxisome proliferator activated receptor gamma [Source:HGNC Symbol;Acc:HGNC:9236]	6.65	5.4	-1.25	0.421	0.00192	0.0135
6297	SALL2	spalt like transcription factor 2 [Source:HGNC Symbol;Acc:HGNC:10526]	6.81	5.57	-1.25	0.421	0.00275	0.0173
8407	TAGLN2	transgelin 2 [Source:HGNC Symbol;Acc:HGNC:11554]	10.7	9.46	-1.25	0.42	0.000663	0.0068
538	ATP7A	ATPase copper transporting alpha [Source:HGNC Symbol;Acc:HGNC:869]	6.05	4.81	-1.24	0.425	0.00109	0.00935
55	ACPP	acid phosphatase, prostate [Source:HGNC Symbol;Acc:HGNC:125]	5.08	3.85	-1.24	0.425	0.00552	0.0277
1019	CDK4	cyclin dependent kinase 4 [Source:HGNC Symbol;Acc:HGNC:1773]	9.45	8.21	-1.24	0.424	1.24e-05	0.000639
10675	CSPG5	chondroitin sulfate proteoglycan 5 [Source:HGNC Symbol;Acc:HGNC:2467]	6.32	5.08	-1.24	0.424	0.00675	0.0317
28969	BZW2	basic leucine zipper and W2 domains 2 [Source:HGNC Symbol;Acc:HGNC:18808]	10.1	8.86	-1.23	0.428	0.000375	0.0048
11163	NUDT4	nudix hydrolase 4 [Source:HGNC Symbol;Acc:HGNC:8051]	6.61	5.38	-1.23	0.426	0.0104	0.0429
2589	GALNT1	polypeptide N-acetylgalactosaminyltransferase 1 [Source:HGNC Symbol;Acc:HGNC:4123]	9.84	8.62	-1.22	0.43	2.14e-05	0.000846
26960	NBEA	neurobeachin [Source:HGNC Symbol;Acc:HGNC:7648]	5.71	4.49	-1.22	0.43	3.24e-05	0.00108
8495	PPFIBP2	PPFIA binding protein 2 [Source:HGNC Symbol;Acc:HGNC:9250]	5.59	4.37	-1.22	0.43	0.00246	0.016
928	CD9	CD9 molecule [Source:HGNC Symbol;Acc:HGNC:1709]	13.3	12.1	-1.22	0.428	3.99e-06	0.000323
6821	SUOX	sulfite oxidase [Source:HGNC Symbol;Acc:HGNC:11460]	6.49	5.28	-1.21	0.432	4.61e-05	0.00134
80221	ACSF2	acyl-CoA synthetase family member 2 [Source:HGNC Symbol;Acc:HGNC:26101]	7.43	6.22	-1.21	0.432	3.57e-06	0.000312
5019	OXCT1	3-oxoacid CoA-transferase 1 [Source:HGNC Symbol;Acc:HGNC:8527]	6.48	5.27	-1.21	0.431	0.000132	0.00247
59338	PLEKHA1	pleckstrin homology domain containing A1 [Source:HGNC Symbol;Acc:HGNC:14335]	8.7	7.48	-1.21	0.431	0.000163	0.00284
64847	SPATA20	spermatogenesis associated 20 [Source:HGNC Symbol;Acc:HGNC:26125]	7.22	6	-1.21	0.431	0.000577	0.0062
6799	SULT1A2	sulfotransferase family 1A member 2 [Source:HGNC Symbol;Acc:HGNC:11454]	7.57	6.36	-1.21	0.431	6.43e-07	0.000129
7048	TGFBR2	transforming growth factor beta receptor 2 [Source:HGNC Symbol;Acc:HGNC:11773]	8.1	6.89	-1.21	0.431	3.86e-05	0.0012
79443	FYCO1	FYVE and coiled-coil domain containing 1 [Source:HGNC Symbol;Acc:HGNC:14673]	7.74	6.52	-1.21	0.431	0.00248	0.0161
27250	PDCD4	programmed cell death 4 [Source:HGNC Symbol;Acc:HGNC:8763]	7.04	5.84	-1.2	0.435	8.96e-06	0.000508
6296	ACSM3	acyl-CoA synthetase medium chain family member 3 [Source:HGNC Symbol;Acc:HGNC:10522]	5.1	3.9	-1.2	0.435	0.00843	0.037
6947	TCN1	transcobalamin 1 [Source:HGNC Symbol;Acc:HGNC:11652]	5.62	4.42	-1.2	0.435	5.6e-05	0.00148
3590	IL11RA	interleukin 11 receptor subunit alpha [Source:HGNC Symbol;Acc:HGNC:5967]	5.95	4.74	-1.2	0.434	1.78e-05	0.000769
54477	PLEKHA5	pleckstrin homology domain containing A5 [Source:HGNC Symbol;Acc:HGNC:30036]	7.13	5.92	-1.2	0.434	0.00386	0.0215
64921	CASD1	CAS1 domain containing 1 [Source:HGNC Symbol;Acc:HGNC:16014]	7.37	6.17	-1.2	0.434	1.5e-05	0.000696
9124	PDLIM1	PDZ and LIM domain 1 [Source:HGNC Symbol;Acc:HGNC:2067]	11.8	10.6	-1.2	0.434	2.42e-06	0.000251
3292	HSD17B1	hydroxysteroid 17-beta dehydrogenase 1 [Source:HGNC Symbol;Acc:HGNC:5210]	6.07	4.88	-1.19	0.439	0.0108	0.0439
4162	MCAM	melanoma cell adhesion molecule [Source:HGNC Symbol;Acc:HGNC:6934]	6.21	5.02	-1.19	0.439	0.00491	0.0255
2697	GJA1	gap junction protein alpha 1 [Source:HGNC Symbol;Acc:HGNC:4274]	12.5	11.4	-1.19	0.438	0.0111	0.0447
6019	RLN2	relaxin 2 [Source:HGNC Symbol;Acc:HGNC:10027]	5.9	4.71	-1.19	0.438	7.09e-05	0.00167
3373	HYAL1	hyaluronoglucosaminidase 1 [Source:HGNC Symbol;Acc:HGNC:5320]	7.18	5.99	-1.19	0.437	0.00576	0.0284
1604	CD55	CD55 molecule (Cromer blood group) [Source:HGNC Symbol;Acc:HGNC:2665]	11.7	10.5	-1.18	0.441	0.000256	0.00385
2135	EXTL2	exostosin like glycosyltransferase 2 [Source:HGNC Symbol;Acc:HGNC:3516]	6.89	5.71	-1.18	0.441	8.74e-05	0.00192
983	CDK1	cyclin dependent kinase 1 [Source:HGNC Symbol;Acc:HGNC:1722]	5.8	4.62	-1.18	0.441	0.0029	0.0179
9852	EPM2AIP1	EPM2A interacting protein 1 [Source:HGNC Symbol;Acc:HGNC:19735]	8.88	7.7	-1.18	0.44	0.000127	0.00241
582	BBS1	Bardet-Biedl syndrome 1 [Source:HGNC Symbol;Acc:HGNC:966]	7.22	6.06	-1.17	0.446	0.000137	0.00255
7582	ZNF33B	zinc finger protein 33B [Source:HGNC Symbol;Acc:HGNC:13097]	6.19	5.02	-1.17	0.444	4.85e-05	0.00138
6470	SHMT1	serine hydroxymethyltransferase 1 [Source:HGNC Symbol;Acc:HGNC:10850]	6.12	4.95	-1.17	0.443	0.00412	0.0225
9263	STK17A	serine/threonine kinase 17a [Source:HGNC Symbol;Acc:HGNC:11395]	7.76	6.6	-1.16	0.449	5.96e-05	0.00153
9200	HACD1	3-hydroxyacyl-CoA dehydratase 1 [Source:HGNC Symbol;Acc:HGNC:9639]	10.2	9	-1.16	0.448	0.00045	0.00528
23588	KLHDC2	kelch domain containing 2 [Source:HGNC Symbol;Acc:HGNC:20231]	9.87	8.7	-1.16	0.447	0.000262	0.00389
284325	C19orf54	chromosome 19 open reading frame 54 [Source:HGNC Symbol;Acc:HGNC:24758]	6.79	5.63	-1.16	0.447	0.00224	0.015
23530	NNT	nicotinamide nucleotide transhydrogenase [Source:HGNC Symbol;Acc:HGNC:7863]	6.72	5.55	-1.16	0.446	7.28e-05	0.00168
5090	PBX3	PBX homeobox 3 [Source:HGNC Symbol;Acc:HGNC:8634]	6.81	5.65	-1.16	0.446	5.22e-06	0.00037
6319	SCD	stearoyl-CoA desaturase [Source:HGNC Symbol;Acc:HGNC:10571]	9.02	7.87	-1.15	0.452	3.97e-07	0.000108
9500	MAGED1	MAGE family member D1 [Source:HGNC Symbol;Acc:HGNC:6813]	10.3	9.17	-1.15	0.45	0.000138	0.00255
55812	SPATA7	spermatogenesis associated 7 [Source:HGNC Symbol;Acc:HGNC:20423]	6.09	4.94	-1.15	0.449	1.9e-06	0.000224
81493	SYNC	syncoilin, intermediate filament protein [Source:HGNC Symbol;Acc:HGNC:28897]	6.36	5.22	-1.14	0.454	0.00101	0.00884
8905	AP1S2	adaptor related protein complex 1 sigma 2 subunit [Source:HGNC Symbol;Acc:HGNC:560]	7.11	5.97	-1.14	0.454	0.00538	0.0272
51596	CUTA	cutA divalent cation tolerance homolog [Source:HGNC Symbol;Acc:HGNC:21101]	10.3	9.16	-1.14	0.452	9.12e-08	5.6e-05
2195	FAT1	FAT atypical cadherin 1 [Source:HGNC Symbol;Acc:HGNC:3595]	9.12	7.99	-1.13	0.457	0.000882	0.00818
79017	GGCT	gamma-glutamylcyclotransferase [Source:HGNC Symbol;Acc:HGNC:21705]	9.64	8.51	-1.13	0.457	9.49e-05	0.00201
89944	GLB1L2	galactosidase beta 1 like 2 [Source:HGNC Symbol;Acc:HGNC:25129]	8.27	7.14	-1.13	0.457	0.000401	0.00496
5087	PBX1	PBX homeobox 1 [Source:HGNC Symbol;Acc:HGNC:8632]	6.77	5.65	-1.12	0.462	0.00198	0.0138
31	ACACA	acetyl-CoA carboxylase alpha [Source:HGNC Symbol;Acc:HGNC:84]	8.75	7.63	-1.12	0.461	8.69e-05	0.00192
2263	FGFR2	fibroblast growth factor receptor 2 [Source:HGNC Symbol;Acc:HGNC:3689]	5.48	4.36	-1.12	0.46	0.000953	0.00854
5793	PTPRG	protein tyrosine phosphatase, receptor type G [Source:HGNC Symbol;Acc:HGNC:9671]	6.07	4.95	-1.12	0.46	0.000946	0.00852
64393	ZMAT3	zinc finger matrin-type 3 [Source:HGNC Symbol;Acc:HGNC:29983]	8.44	7.32	-1.12	0.46	0.00849	0.0372
427	ASAH1	N-acylsphingosine amidohydrolase 1 [Source:HGNC Symbol;Acc:HGNC:735]	11.7	10.6	-1.12	0.459	7.53e-05	0.00171
5825	ABCD3	ATP binding cassette subfamily D member 3 [Source:HGNC Symbol;Acc:HGNC:67]	10.6	9.46	-1.12	0.459	3.2e-06	0.000292
6653	SORL1	sortilin related receptor 1 [Source:HGNC Symbol;Acc:HGNC:11185]	5.69	4.58	-1.11	0.465	0.000921	0.00844
476	ATP1A1	ATPase Na+/K+ transporting subunit alpha 1 [Source:HGNC Symbol;Acc:HGNC:799]	10.7	9.63	-1.11	0.464	0.00261	0.0167
9071	CLDN10	claudin 10 [Source:HGNC Symbol;Acc:HGNC:2033]	5.27	4.16	-1.11	0.463	0.00613	0.0296
23287	AGTPBP1	ATP/GTP binding protein 1 [Source:HGNC Symbol;Acc:HGNC:17258]	8.09	6.98	-1.11	0.462	0.00112	0.00949
27018	BEX3	brain expressed X-linked 3 [Source:HGNC Symbol;Acc:HGNC:13388]	11.7	10.6	-1.1	0.468	2.84e-06	0.000278
25975	EGFL6	EGF like domain multiple 6 [Source:HGNC Symbol;Acc:HGNC:3235]	4.96	3.86	-1.1	0.466	6.43e-05	0.0016
54677	CROT	carnitine O-octanoyltransferase [Source:HGNC Symbol;Acc:HGNC:2366]	7.85	6.75	-1.1	0.466	3.11e-06	0.000291
9057	SLC7A6	solute carrier family 7 member 6 [Source:HGNC Symbol;Acc:HGNC:11064]	6.06	4.98	-1.09	0.471	0.00603	0.0293
10186	LHFPL6	LHFPL tetraspan subfamily member 6 [Source:HGNC Symbol;Acc:HGNC:6586]	6.68	5.59	-1.09	0.47	6.68e-06	0.00042
1164	CKS2	CDC28 protein kinase regulatory subunit 2 [Source:HGNC Symbol;Acc:HGNC:2000]	11	9.89	-1.09	0.47	0.000323	0.00438
1717	DHCR7	7-dehydrocholesterol reductase [Source:HGNC Symbol;Acc:HGNC:2860]	8.88	7.79	-1.09	0.47	0.000472	0.00544
23475	QPRT	quinolinate phosphoribosyltransferase [Source:HGNC Symbol;Acc:HGNC:9755]	7.64	6.55	-1.09	0.47	0.0067	0.0315
29901	SAC3D1	SAC3 domain containing 1 [Source:HGNC Symbol;Acc:HGNC:30179]	7.74	6.65	-1.09	0.47	9.37e-07	0.000157
3615	IMPDH2	inosine monophosphate dehydrogenase 2 [Source:HGNC Symbol;Acc:HGNC:6053]	9.76	8.68	-1.09	0.47	0.00122	0.01
397	ARHGDIB	Rho GDP dissociation inhibitor beta [Source:HGNC Symbol;Acc:HGNC:679]	9.21	8.12	-1.09	0.469	0.000963	0.00859
8555	CDC14B	cell division cycle 14B [Source:HGNC Symbol;Acc:HGNC:1719]	6.54	5.44	-1.09	0.468	9.67e-05	0.00204
26268	FBXO9	F-box protein 9 [Source:HGNC Symbol;Acc:HGNC:13588]	8.81	7.73	-1.08	0.474	1.83e-05	0.000777
64856	VWA1	von Willebrand factor A domain containing 1 [Source:HGNC Symbol;Acc:HGNC:30910]	6.61	5.53	-1.08	0.473	0.000679	0.0069
54344	DPM3	dolichyl-phosphate mannosyltransferase subunit 3 [Source:HGNC Symbol;Acc:HGNC:3007]	7.97	6.88	-1.08	0.472	3.39e-05	0.0011
8459	TPST2	tyrosylprotein sulfotransferase 2 [Source:HGNC Symbol;Acc:HGNC:12021]	8.65	7.57	-1.08	0.472	0.000215	0.00344
25864	ABHD14A	abhydrolase domain containing 14A [Source:HGNC Symbol;Acc:HGNC:24538]	6.75	5.69	-1.07	0.477	6.99e-05	0.00166
1532	NA	NA	4.67	3.6	-1.07	0.476	0.00386	0.0215
51133	KCTD3	potassium channel tetramerization domain containing 3 [Source:HGNC Symbol;Acc:HGNC:21305]	6.65	5.58	-1.07	0.476	0.000237	0.00367
10051	SMC4	structural maintenance of chromosomes 4 [Source:HGNC Symbol;Acc:HGNC:14013]	5.88	4.81	-1.07	0.475	0.000336	0.00448
65265	C8orf33	chromosome 8 open reading frame 33 [Source:HGNC Symbol;Acc:HGNC:26104]	6.88	5.83	-1.06	0.481	0.00222	0.0149
25906	ANAPC15	anaphase promoting complex subunit 15 [Source:HGNC Symbol;Acc:HGNC:24531]	7.27	6.21	-1.06	0.48	6.87e-05	0.00165
25996	REXO2	RNA exonuclease 2 [Source:HGNC Symbol;Acc:HGNC:17851]	11	9.9	-1.06	0.48	1.22e-06	0.000177
5447	POR	cytochrome p450 oxidoreductase [Source:HGNC Symbol;Acc:HGNC:9208]	7.45	6.39	-1.06	0.48	0.000796	0.00763
79794	C12orf49	chromosome 12 open reading frame 49 [Source:HGNC Symbol;Acc:HGNC:26128]	8.34	7.28	-1.06	0.48	0.000248	0.00379
22929	SEPHS1	selenophosphate synthetase 1 [Source:HGNC Symbol;Acc:HGNC:19685]	6.82	5.75	-1.06	0.479	2.21e-05	0.000861
23294	ANKS1A	ankyrin repeat and sterile alpha motif domain containing 1A [Source:HGNC Symbol;Acc:HGNC:20961]	8.09	7.03	-1.06	0.479	0.000459	0.00536
23514	SPIDR	scaffolding protein involved in DNA repair [Source:HGNC Symbol;Acc:HGNC:28971]	6.3	5.23	-1.06	0.479	0.000185	0.00312
53832	IL20RA	interleukin 20 receptor subunit alpha [Source:HGNC Symbol;Acc:HGNC:6003]	4.62	3.56	-1.06	0.479	0.000169	0.00291
56271	BEX4	brain expressed X-linked 4 [Source:HGNC Symbol;Acc:HGNC:25475]	8.08	7.03	-1.05	0.485	0.00201	0.0139
23023	TMCC1	transmembrane and coiled-coil domain family 1 [Source:HGNC Symbol;Acc:HGNC:29116]	7.64	6.6	-1.05	0.484	0.00671	0.0316
51386	EIF3L	eukaryotic translation initiation factor 3 subunit L [Source:HGNC Symbol;Acc:HGNC:18138]	11.9	10.9	-1.05	0.484	0.00027	0.00394
5723	PSPH	phosphoserine phosphatase [Source:HGNC Symbol;Acc:HGNC:9577]	6.55	5.51	-1.05	0.484	0.00512	0.0263
84263	HSDL2	hydroxysteroid dehydrogenase like 2 [Source:HGNC Symbol;Acc:HGNC:18572]	7.4	6.35	-1.05	0.484	0.0046	0.0243
7164	TPD52L1	tumor protein D52 like 1 [Source:HGNC Symbol;Acc:HGNC:12006]	8.21	7.16	-1.05	0.483	0.000499	0.00567
8850	KAT2B	lysine acetyltransferase 2B [Source:HGNC Symbol;Acc:HGNC:8638]	7.47	6.42	-1.05	0.482	2.85e-05	0.00101
9749	PHACTR2	phosphatase and actin regulator 2 [Source:HGNC Symbol;Acc:HGNC:20956]	8.31	7.27	-1.04	0.488	0.000133	0.0025
10352	WARS2	tryptophanyl tRNA synthetase 2, mitochondrial [Source:HGNC Symbol;Acc:HGNC:12730]	6.3	5.26	-1.04	0.487	0.000229	0.00359
5445	PON2	paraoxonase 2 [Source:HGNC Symbol;Acc:HGNC:9205]	11.6	10.5	-1.04	0.487	0.00141	0.011
5770	PTPN1	protein tyrosine phosphatase, non-receptor type 1 [Source:HGNC Symbol;Acc:HGNC:9642]	8.78	7.74	-1.04	0.487	1.36e-05	0.000668
9166	EBAG9	estrogen receptor binding site associated, antigen, 9 [Source:HGNC Symbol;Acc:HGNC:3123]	8.14	7.1	-1.04	0.487	1.36e-05	0.000668
11257	NA	NA	7.57	6.53	-1.04	0.486	5.1e-05	0.00142
374868	ATP9B	ATPase phospholipid transporting 9B (putative) [Source:HGNC Symbol;Acc:HGNC:13541]	6.47	5.43	-1.04	0.485	5.23e-05	0.00143
54682	MANSC1	MANSC domain containing 1 [Source:HGNC Symbol;Acc:HGNC:25505]	8.81	7.79	-1.03	0.491	5.1e-05	0.00142
8493	PPM1D	protein phosphatase, Mg2+/Mn2+ dependent 1D [Source:HGNC Symbol;Acc:HGNC:9277]	7.02	5.99	-1.03	0.491	0.00678	0.0318
652	BMP4	bone morphogenetic protein 4 [Source:HGNC Symbol;Acc:HGNC:1071]	5.99	4.96	-1.03	0.49	0.0122	0.0476
8554	PIAS1	protein inhibitor of activated STAT 1 [Source:HGNC Symbol;Acc:HGNC:2752]	8.24	7.21	-1.03	0.49	3.51e-05	0.00112
1277	COL1A1	collagen type I alpha 1 chain [Source:HGNC Symbol;Acc:HGNC:2197]	5.76	4.73	-1.03	0.489	0.00501	0.0259
4698	NDUFA5	NADH:ubiquinone oxidoreductase subunit A5 [Source:HGNC Symbol;Acc:HGNC:7688]	9.9	8.87	-1.03	0.489	3.42e-05	0.0011
79731	NARS2	asparaginyl-tRNA synthetase 2, mitochondrial (putative) [Source:HGNC Symbol;Acc:HGNC:26274]	7.54	6.5	-1.03	0.489	0.00135	0.0107
10873	ME3	malic enzyme 3 [Source:HGNC Symbol;Acc:HGNC:6985]	7.08	6.04	-1.03	0.488	0.000221	0.00351
51111	KMT5B	lysine methyltransferase 5B [Source:HGNC Symbol;Acc:HGNC:24283]	7.89	6.87	-1.02	0.495	9.24e-05	0.00197
8527	DGKD	diacylglycerol kinase delta [Source:HGNC Symbol;Acc:HGNC:2851]	8.2	7.18	-1.02	0.494	0.000925	0.00845
2040	STOM	stomatin [Source:HGNC Symbol;Acc:HGNC:3383]	12	11	-1.02	0.493	0.0043	0.0232
483	ATP1B3	ATPase Na+/K+ transporting subunit beta 3 [Source:HGNC Symbol;Acc:HGNC:806]	11	10	-1.02	0.492	0.00385	0.0215
54832	VPS13C	vacuolar protein sorting 13 homolog C [Source:HGNC Symbol;Acc:HGNC:23594]	9.79	8.77	-1.02	0.492	0.00752	0.0343
100133941	CD24	CD24 molecule [Source:HGNC Symbol;Acc:HGNC:1645]	12.2	11.2	-1.01	0.498	0.00433	0.0233
539	ATP5O	ATP synthase, H+ transporting, mitochondrial F1 complex, O subunit [Source:HGNC Symbol;Acc:HGNC:850]	12.8	11.8	-1.01	0.497	0.000688	0.00697
896	CCND3	cyclin D3 [Source:HGNC Symbol;Acc:HGNC:1585]	9.73	8.72	-1.01	0.497	0.000334	0.00447
81618	ITM2C	integral membrane protein 2C [Source:HGNC Symbol;Acc:HGNC:6175]	7.43	6.42	-1	0.499	1.69e-06	0.000205
9223	MAGI1	membrane associated guanylate kinase, WW and PDZ domain containing 1 [Source:HGNC Symbol;Acc:HGNC:946]	4.7	3.7	-1	0.499	4.44e-06	0.000329
1285	COL4A3	collagen type IV alpha 3 chain [Source:HGNC Symbol;Acc:HGNC:2204]	5.99	4.99	-1	0.498	0.00454	0.0241
3592	IL12A	interleukin 12A [Source:HGNC Symbol;Acc:HGNC:5969]	3.17	4.19	1.01	2.02	9.33e-05	0.00199
5025	P2RX4	purinergic receptor P2X 4 [Source:HGNC Symbol;Acc:HGNC:8535]	7.87	8.89	1.01	2.02	2.27e-06	0.000247
10435	CDC42EP2	CDC42 effector protein 2 [Source:HGNC Symbol;Acc:HGNC:16263]	5.31	6.32	1.01	2.01	9.17e-06	0.000514
5610	EIF2AK2	eukaryotic translation initiation factor 2 alpha kinase 2 [Source:HGNC Symbol;Acc:HGNC:9437]	6.39	7.4	1.01	2.01	0.00344	0.0201
57018	CCNL1	cyclin L1 [Source:HGNC Symbol;Acc:HGNC:20569]	6.7	7.71	1.01	2.01	7.27e-05	0.00168
63916	ELMO2	engulfment and cell motility 2 [Source:HGNC Symbol;Acc:HGNC:17233]	6.38	7.38	1.01	2.01	0.000926	0.00845
80176	SPSB1	splA/ryanodine receptor domain and SOCS box containing 1 [Source:HGNC Symbol;Acc:HGNC:30628]	6.75	7.76	1.01	2.01	0.000447	0.00526
8871	SYNJ2	synaptojanin 2 [Source:HGNC Symbol;Acc:HGNC:11504]	4.95	5.96	1.01	2.01	0.00026	0.00387
4891	SLC11A2	solute carrier family 11 member 2 [Source:HGNC Symbol;Acc:HGNC:10908]	8.3	9.33	1.02	2.03	0.000404	0.00498
586	BCAT1	branched chain amino acid transaminase 1 [Source:HGNC Symbol;Acc:HGNC:976]	4.94	5.96	1.02	2.03	0.00672	0.0316
678	ZFP36L2	ZFP36 ring finger protein like 2 [Source:HGNC Symbol;Acc:HGNC:1108]	5.14	6.15	1.02	2.03	0.000385	0.00485
4794	NFKBIE	NFKB inhibitor epsilon [Source:HGNC Symbol;Acc:HGNC:7799]	6.48	7.51	1.03	2.04	3.07e-06	0.000291
5272	SERPINB9	serpin family B member 9 [Source:HGNC Symbol;Acc:HGNC:8955]	4.22	5.25	1.03	2.04	8.75e-05	0.00192
56929	FEM1C	fem-1 homolog C [Source:HGNC Symbol;Acc:HGNC:16933]	7.96	8.99	1.03	2.04	0.00114	0.00957
594841	NA	NA	7.72	8.75	1.03	2.04	1.79e-05	0.000772
79852	EPHX3	epoxide hydrolase 3 [Source:HGNC Symbol;Acc:HGNC:23760]	6.48	7.51	1.03	2.04	0.000763	0.00742
5606	MAP2K3	mitogen-activated protein kinase kinase 3 [Source:HGNC Symbol;Acc:HGNC:6843]	8.6	9.64	1.04	2.06	1.91e-05	0.000787
9143	SYNGR3	synaptogyrin 3 [Source:HGNC Symbol;Acc:HGNC:11501]	4.62	5.66	1.04	2.06	0.00194	0.0136
26499	PLEK2	pleckstrin 2 [Source:HGNC Symbol;Acc:HGNC:19238]	7.5	8.54	1.04	2.05	0.000448	0.00527
6280	S100A9	S100 calcium binding protein A9 [Source:HGNC Symbol;Acc:HGNC:10499]	10.6	11.7	1.05	2.08	0.0077	0.0348
391020	NA	NA	6.43	7.49	1.05	2.07	0.00232	0.0153
5970	RELA	RELA proto-oncogene, NF-kB subunit [Source:HGNC Symbol;Acc:HGNC:9955]	6.56	7.61	1.05	2.07	5.21e-07	0.000124
171586	ABHD3	abhydrolase domain containing 3 [Source:HGNC Symbol;Acc:HGNC:18718]	7.32	8.38	1.06	2.09	0.00501	0.0259
65986	ZBTB10	zinc finger and BTB domain containing 10 [Source:HGNC Symbol;Acc:HGNC:30953]	6.19	7.25	1.06	2.09	0.000308	0.00423
834	CASP1	caspase 1 [Source:HGNC Symbol;Acc:HGNC:1499]	6.98	8.04	1.06	2.09	0.00458	0.0242
8634	RTCA	RNA 3'-terminal phosphate cyclase [Source:HGNC Symbol;Acc:HGNC:17981]	8.58	9.65	1.06	2.09	0.00321	0.0192
1594	CYP27B1	cytochrome P450 family 27 subfamily B member 1 [Source:HGNC Symbol;Acc:HGNC:2606]	5.32	6.39	1.07	2.1	0.000475	0.00546
2530	FUT8	fucosyltransferase 8 [Source:HGNC Symbol;Acc:HGNC:4019]	7.37	8.44	1.07	2.1	0.00875	0.038
51635	DHRS7	dehydrogenase/reductase 7 [Source:HGNC Symbol;Acc:HGNC:21524]	9.68	10.7	1.07	2.1	0.000556	0.00606
8792	TNFRSF11A	TNF receptor superfamily member 11a [Source:HGNC Symbol;Acc:HGNC:11908]	4.67	5.74	1.07	2.09	0.00153	0.0117
10019	SH2B3	SH2B adaptor protein 3 [Source:HGNC Symbol;Acc:HGNC:29605]	6.58	7.67	1.08	2.12	7.34e-05	0.00169
3732	CD82	CD82 molecule [Source:HGNC Symbol;Acc:HGNC:6210]	7.81	8.89	1.08	2.12	1.15e-05	0.000602
230	ALDOC	aldolase, fructose-bisphosphate C [Source:HGNC Symbol;Acc:HGNC:418]	6.58	7.66	1.08	2.11	0.000936	0.00848
3304	HSPA1B	heat shock protein family A (Hsp70) member 1B [Source:HGNC Symbol;Acc:HGNC:5233]	9.35	10.4	1.08	2.11	0.000137	0.00255
4600	MX2	MX dynamin like GTPase 2 [Source:HGNC Symbol;Acc:HGNC:7533]	6.12	7.2	1.08	2.11	0.00455	0.0241
6776	STAT5A	signal transducer and activator of transcription 5A [Source:HGNC Symbol;Acc:HGNC:11366]	6.02	7.1	1.08	2.11	0.000409	0.00502
6819	SULT1C2	sulfotransferase family 1C member 2 [Source:HGNC Symbol;Acc:HGNC:11456]	4.5	5.58	1.08	2.11	0.0115	0.0457
10802	SEC24A	SEC24 homolog A, COPII coat complex component [Source:HGNC Symbol;Acc:HGNC:10703]	7.4	8.49	1.09	2.13	1.31e-06	0.000182
27246	RNF115	ring finger protein 115 [Source:HGNC Symbol;Acc:HGNC:18154]	8.31	9.4	1.09	2.13	1.2e-05	0.000617
917	CD3G	CD3g molecule [Source:HGNC Symbol;Acc:HGNC:1675]	4.4	5.49	1.09	2.13	0.0028	0.0175
23102	TBC1D2B	TBC1 domain family member 2B [Source:HGNC Symbol;Acc:HGNC:29183]	7.63	8.71	1.09	2.12	2.68e-05	0.000963
4233	MET	MET proto-oncogene, receptor tyrosine kinase [Source:HGNC Symbol;Acc:HGNC:7029]	6.88	7.98	1.1	2.15	1.05e-05	0.000562
8837	CFLAR	CASP8 and FADD like apoptosis regulator [Source:HGNC Symbol;Acc:HGNC:1876]	6.86	7.96	1.1	2.15	0.000438	0.0052
55236	UBA6	ubiquitin like modifier activating enzyme 6 [Source:HGNC Symbol;Acc:HGNC:25581]	6.49	7.59	1.1	2.14	0.000153	0.00273
84159	ARID5B	AT-rich interaction domain 5B [Source:HGNC Symbol;Acc:HGNC:17362]	9.17	10.3	1.1	2.14	0.00567	0.0282
9830	TRIM14	tripartite motif containing 14 [Source:HGNC Symbol;Acc:HGNC:16283]	6.5	7.6	1.1	2.14	0.000918	0.00842
4690	NCK1	NCK adaptor protein 1 [Source:HGNC Symbol;Acc:HGNC:7664]	8.11	9.22	1.11	2.17	1.74e-05	0.000762
219	ALDH1B1	aldehyde dehydrogenase 1 family member B1 [Source:HGNC Symbol;Acc:HGNC:407]	5.65	6.76	1.11	2.16	0.00368	0.0209
219333	USP12	ubiquitin specific peptidase 12 [Source:HGNC Symbol;Acc:HGNC:20485]	8.17	9.28	1.11	2.16	9.07e-07	0.000154
55701	ARHGEF40	Rho guanine nucleotide exchange factor 40 [Source:HGNC Symbol;Acc:HGNC:25516]	6.22	7.34	1.11	2.16	0.00028	0.004
3560	IL2RB	interleukin 2 receptor subunit beta [Source:HGNC Symbol;Acc:HGNC:6009]	5.81	6.93	1.12	2.18	0.00372	0.021
80273	GRPEL1	GrpE like 1, mitochondrial [Source:HGNC Symbol;Acc:HGNC:19696]	7.99	9.11	1.12	2.18	0.000117	0.0023
8877	SPHK1	sphingosine kinase 1 [Source:HGNC Symbol;Acc:HGNC:11240]	6.49	7.62	1.13	2.19	0.000617	0.00643
93349	SP140L	SP140 nuclear body protein like [Source:HGNC Symbol;Acc:HGNC:25105]	5.91	7.04	1.13	2.19	5.24e-05	0.00143
6346	CCL1	C-C motif chemokine ligand 1 [Source:HGNC Symbol;Acc:HGNC:10609]	4.23	5.36	1.13	2.18	0.00471	0.0248
79155	TNIP2	TNFAIP3 interacting protein 2 [Source:HGNC Symbol;Acc:HGNC:19118]	7.25	8.38	1.13	2.18	1.49e-05	0.000696
10116	FEM1B	fem-1 homolog B [Source:HGNC Symbol;Acc:HGNC:3649]	6.18	7.33	1.14	2.21	2.48e-05	0.000916
26207	PITPNC1	phosphatidylinositol transfer protein, cytoplasmic 1 [Source:HGNC Symbol;Acc:HGNC:21045]	5.93	7.07	1.14	2.2	0.00177	0.0128
26278	SACS	sacsin molecular chaperone [Source:HGNC Symbol;Acc:HGNC:10519]	4.95	6.09	1.14	2.2	0.00752	0.0343
60485	SAV1	salvador family WW domain containing protein 1 [Source:HGNC Symbol;Acc:HGNC:17795]	7.23	8.37	1.14	2.2	0.00164	0.0122
8651	SOCS1	suppressor of cytokine signaling 1 [Source:HGNC Symbol;Acc:HGNC:19383]	5	6.14	1.14	2.2	2.11e-07	8.1e-05
5292	PIM1	Pim-1 proto-oncogene, serine/threonine kinase [Source:HGNC Symbol;Acc:HGNC:8986]	6.68	7.84	1.15	2.22	1.05e-05	0.000562
6737	TRIM21	tripartite motif containing 21 [Source:HGNC Symbol;Acc:HGNC:11312]	6.43	7.58	1.15	2.21	0.000389	0.00488
93081	TEX30	testis expressed 30 [Source:HGNC Symbol;Acc:HGNC:25188]	6.21	7.38	1.16	2.24	0.000155	0.00275
11182	SLC2A6	solute carrier family 2 member 6 [Source:HGNC Symbol;Acc:HGNC:11011]	6.88	8.04	1.16	2.23	0.00331	0.0196
113878	DTX2	deltex E3 ubiquitin ligase 2 [Source:HGNC Symbol;Acc:HGNC:15973]	5.37	6.53	1.16	2.23	6.25e-06	0.000414
4192	MDK	midkine (neurite growth-promoting factor 2) [Source:HGNC Symbol;Acc:HGNC:6972]	6.74	7.9	1.16	2.23	0.000945	0.00852
148022	TICAM1	toll like receptor adaptor molecule 1 [Source:HGNC Symbol;Acc:HGNC:18348]	5.72	6.89	1.17	2.26	5.48e-05	0.00147
1075	CTSC	cathepsin C [Source:HGNC Symbol;Acc:HGNC:2528]	9.88	11	1.17	2.25	0.00468	0.0246
56650	CLDND1	claudin domain containing 1 [Source:HGNC Symbol;Acc:HGNC:1322]	7.32	8.49	1.17	2.25	3.64e-05	0.00115
9242	MSC	musculin [Source:HGNC Symbol;Acc:HGNC:7321]	4.08	5.25	1.17	2.24	0.00839	0.0369
116496	FAM129A	family with sequence similarity 129 member A [Source:HGNC Symbol;Acc:HGNC:16784]	5.92	7.11	1.18	2.27	0.000711	0.00709
27286	SRPX2	sushi repeat containing protein, X-linked 2 [Source:HGNC Symbol;Acc:HGNC:30668]	4.97	6.15	1.18	2.27	0.00215	0.0145
54541	DDIT4	DNA damage inducible transcript 4 [Source:HGNC Symbol;Acc:HGNC:24944]	8.05	9.23	1.18	2.27	0.0012	0.00991
56061	UBFD1	ubiquitin family domain containing 1 [Source:HGNC Symbol;Acc:HGNC:30565]	5.53	6.71	1.18	2.27	0.000316	0.0043
9021	SOCS3	suppressor of cytokine signaling 3 [Source:HGNC Symbol;Acc:HGNC:19391]	5.28	6.47	1.18	2.27	4.62e-07	0.000118
29919	C18orf8	chromosome 18 open reading frame 8 [Source:HGNC Symbol;Acc:HGNC:24326]	7.39	8.56	1.18	2.26	1.03e-06	0.000167
5371	PML	promyelocytic leukemia [Source:HGNC Symbol;Acc:HGNC:9113]	5.02	6.2	1.18	2.26	2.51e-07	8.49e-05
10133	OPTN	optineurin [Source:HGNC Symbol;Acc:HGNC:17142]	8.03	9.22	1.19	2.28	2.44e-05	0.000908
3664	IRF6	interferon regulatory factor 6 [Source:HGNC Symbol;Acc:HGNC:6121]	8.78	9.97	1.19	2.28	0.000232	0.00362
54583	EGLN1	egl-9 family hypoxia inducible factor 1 [Source:HGNC Symbol;Acc:HGNC:1232]	5.72	6.91	1.19	2.28	5.99e-06	0.000406
54877	ZCCHC2	zinc finger CCHC-type containing 2 [Source:HGNC Symbol;Acc:HGNC:22916]	6.39	7.58	1.19	2.28	3.02e-05	0.00105
2037	EPB41L2	erythrocyte membrane protein band 4.1 like 2 [Source:HGNC Symbol;Acc:HGNC:3379]	4.27	5.47	1.2	2.3	1.24e-07	6.15e-05
6322	SCML1	sex comb on midleg like 1 (Drosophila) [Source:HGNC Symbol;Acc:HGNC:10580]	4.87	6.07	1.2	2.3	0.000633	0.00654
8836	GGH	gamma-glutamyl hydrolase [Source:HGNC Symbol;Acc:HGNC:4248]	8.49	9.7	1.2	2.3	0.00299	0.0183
571	BACH1	BTB domain and CNC homolog 1 [Source:HGNC Symbol;Acc:HGNC:935]	5.39	6.59	1.2	2.29	0.000163	0.00285
6676	SPAG4	sperm associated antigen 4 [Source:HGNC Symbol;Acc:HGNC:11214]	4.73	5.93	1.2	2.29	0.000241	0.00371
10105	PPIF	peptidylprolyl isomerase F [Source:HGNC Symbol;Acc:HGNC:9259]	7.47	8.69	1.21	2.32	0.00228	0.0151
3918	LAMC2	laminin subunit gamma 2 [Source:HGNC Symbol;Acc:HGNC:6493]	6.96	8.18	1.21	2.32	0.00891	0.0385
6566	SLC16A1	solute carrier family 16 member 1 [Source:HGNC Symbol;Acc:HGNC:10922]	4.45	5.66	1.21	2.31	0.00013	0.00245
8343	HIST1H2BF	histone cluster 1 H2B family member f [Source:HGNC Symbol;Acc:HGNC:4752]	5.76	6.97	1.21	2.31	4.77e-05	0.00136
3665	IRF7	interferon regulatory factor 7 [Source:HGNC Symbol;Acc:HGNC:6122]	6.31	7.53	1.22	2.34	2.53e-06	0.000255
25780	RASGRP3	RAS guanyl releasing protein 3 [Source:HGNC Symbol;Acc:HGNC:14545]	4.88	6.1	1.22	2.33	1.38e-05	0.000668
9111	NMI	N-myc and STAT interactor [Source:HGNC Symbol;Acc:HGNC:7854]	8.83	10	1.22	2.32	0.000332	0.00444
27113	BBC3	BCL2 binding component 3 [Source:HGNC Symbol;Acc:HGNC:17868]	5.91	7.14	1.23	2.35	2.49e-05	0.000916
388	RHOB	ras homolog family member B [Source:HGNC Symbol;Acc:HGNC:668]	7.27	8.5	1.23	2.34	0.000698	0.00703
55359	STYK1	serine/threonine/tyrosine kinase 1 [Source:HGNC Symbol;Acc:HGNC:18889]	4.88	6.11	1.23	2.34	0.00248	0.0161
10544	PROCR	protein C receptor [Source:HGNC Symbol;Acc:HGNC:9452]	7.6	8.84	1.24	2.37	0.0032	0.0191
3137	NA	NA	9.48	10.7	1.24	2.36	0.00198	0.0138
7098	TLR3	toll like receptor 3 [Source:HGNC Symbol;Acc:HGNC:11849]	7.11	8.34	1.24	2.35	0.00147	0.0114
1992	SERPINB1	serpin family B member 1 [Source:HGNC Symbol;Acc:HGNC:3311]	9.92	11.2	1.25	2.39	0.000103	0.0021
58472	SQOR	sulfide quinone oxidoreductase [Source:HGNC Symbol;Acc:HGNC:20390]	11.4	12.7	1.25	2.38	4.08e-06	0.000323
4643	MYO1E	myosin IE [Source:HGNC Symbol;Acc:HGNC:7599]	5.41	6.66	1.25	2.37	0.00024	0.00371
2172	FABP6	fatty acid binding protein 6 [Source:HGNC Symbol;Acc:HGNC:3561]	4.42	5.68	1.26	2.4	0.000141	0.0026
3428	IFI16	interferon gamma inducible protein 16 [Source:HGNC Symbol;Acc:HGNC:5395]	8.21	9.47	1.26	2.4	5.29e-05	0.00144
56675	NRIP3	nuclear receptor interacting protein 3 [Source:HGNC Symbol;Acc:HGNC:1167]	6.25	7.51	1.26	2.4	0.00349	0.0203
5899	RALB	RAS like proto-oncogene B [Source:HGNC Symbol;Acc:HGNC:9840]	7.13	8.39	1.26	2.4	0.000152	0.00273
64699	TMPRSS3	transmembrane protease, serine 3 [Source:HGNC Symbol;Acc:HGNC:11877]	5.6	6.87	1.26	2.4	0.00328	0.0194
23515	MORC3	MORC family CW-type zinc finger 3 [Source:HGNC Symbol;Acc:HGNC:23572]	7.91	9.17	1.26	2.39	1.32e-05	0.000666
5687	PSMA6	proteasome subunit alpha 6 [Source:HGNC Symbol;Acc:HGNC:9535]	12.6	13.9	1.26	2.39	5.94e-07	0.000129
5142	PDE4B	phosphodiesterase 4B [Source:HGNC Symbol;Acc:HGNC:8781]	4.94	6.21	1.27	2.42	0.000588	0.00627
65983	GRAMD2B	GRAM domain containing 2B [Source:HGNC Symbol;Acc:HGNC:24911]	9.17	10.4	1.27	2.42	1.02e-05	0.000552
7296	TXNRD1	thioredoxin reductase 1 [Source:HGNC Symbol;Acc:HGNC:12437]	11.4	12.7	1.27	2.42	0.00166	0.0123
24138	IFIT5	interferon induced protein with tetratricopeptide repeats 5 [Source:HGNC Symbol;Acc:HGNC:13328]	7.83	9.1	1.27	2.41	0.000471	0.00544
8605	PLA2G4C	phospholipase A2 group IVC [Source:HGNC Symbol;Acc:HGNC:9037]	5.11	6.38	1.27	2.41	0.0054	0.0273
2525	FUT3	fucosyltransferase 3 (Lewis blood group) [Source:HGNC Symbol;Acc:HGNC:4014]	5.79	7.07	1.28	2.43	0.000111	0.00221
51191	HERC5	HECT and RLD domain containing E3 ubiquitin protein ligase 5 [Source:HGNC Symbol;Acc:HGNC:24368]	4.55	5.82	1.28	2.42	0.000232	0.00363
11119	BTN3A1	butyrophilin subfamily 3 member A1 [Source:HGNC Symbol;Acc:HGNC:1138]	5.52	6.81	1.29	2.45	0.00211	0.0144
84679	SLC9A7	solute carrier family 9 member A7 [Source:HGNC Symbol;Acc:HGNC:17123]	3.48	4.77	1.29	2.44	1.69e-06	0.000205
8829	NRP1	neuropilin 1 [Source:HGNC Symbol;Acc:HGNC:8004]	4.91	6.2	1.3	2.46	0.00101	0.00884
10903	MTMR11	myotubularin related protein 11 [Source:HGNC Symbol;Acc:HGNC:24307]	4.91	6.22	1.31	2.49	7.35e-06	0.000444
27348	TOR1B	torsin family 1 member B [Source:HGNC Symbol;Acc:HGNC:11995]	8.13	9.44	1.31	2.47	1.75e-05	0.000762
6236	RRAD	RRAD, Ras related glycolysis inhibitor and calcium channel regulator [Source:HGNC Symbol;Acc:HGNC:10446]	4.41	5.71	1.31	2.47	0.0057	0.0283
23258	DENND5A	DENN domain containing 5A [Source:HGNC Symbol;Acc:HGNC:19344]	7.95	9.28	1.32	2.5	2.48e-05	0.000916
440026	TMEM41B	transmembrane protein 41B [Source:HGNC Symbol;Acc:HGNC:28948]	10.3	11.6	1.32	2.5	6.71e-05	0.00164
6102	RP2	RP2, ARL3 GTPase activating protein [Source:HGNC Symbol;Acc:HGNC:10274]	7.89	9.21	1.32	2.5	0.000804	0.00767
645745	MT1HL1	metallothionein 1H like 1 [Source:HGNC Symbol;Acc:HGNC:31864]	7	8.32	1.32	2.5	0.000464	0.00541
694	BTG1	BTG anti-proliferation factor 1 [Source:HGNC Symbol;Acc:HGNC:1130]	10.3	11.6	1.32	2.5	0.000101	0.00209
8444	DYRK3	dual specificity tyrosine phosphorylation regulated kinase 3 [Source:HGNC Symbol;Acc:HGNC:3094]	5.87	7.19	1.32	2.5	0.000108	0.00219
10866	HCP5	HLA complex P5 (non-protein coding) [Source:HGNC Symbol;Acc:HGNC:21659]	7.21	8.52	1.32	2.49	0.0127	0.0487
6781	STC1	stanniocalcin 1 [Source:HGNC Symbol;Acc:HGNC:11373]	4.94	6.27	1.33	2.52	0.00714	0.033
6926	TBX3	T-box 3 [Source:HGNC Symbol;Acc:HGNC:11602]	3.7	5.04	1.33	2.52	0.0127	0.0488
7124	TNF	tumor necrosis factor [Source:HGNC Symbol;Acc:HGNC:11892]	4.15	5.48	1.33	2.51	9.16e-05	0.00196
64761	PARP12	poly(ADP-ribose) polymerase family member 12 [Source:HGNC Symbol;Acc:HGNC:21919]	8.05	9.39	1.34	2.54	2.49e-05	0.000916
9945	GFPT2	glutamine-fructose-6-phosphate transaminase 2 [Source:HGNC Symbol;Acc:HGNC:4242]	4.59	5.93	1.34	2.52	0.00547	0.0276
23645	PPP1R15A	protein phosphatase 1 regulatory subunit 15A [Source:HGNC Symbol;Acc:HGNC:14375]	6.22	7.57	1.35	2.55	0.000207	0.00335
8345	HIST1H2BH	histone cluster 1 H2B family member h [Source:HGNC Symbol;Acc:HGNC:4755]	4.76	6.11	1.35	2.55	0.000308	0.00423
3097	HIVEP2	human immunodeficiency virus type I enhancer binding protein 2 [Source:HGNC Symbol;Acc:HGNC:4921]	4.72	6.07	1.35	2.54	6.08e-06	0.000406
4814	NINJ1	ninjurin 1 [Source:HGNC Symbol;Acc:HGNC:7824]	8.51	9.86	1.35	2.54	1.06e-07	5.93e-05
960	CD44	CD44 molecule (Indian blood group) [Source:HGNC Symbol;Acc:HGNC:1681]	8.84	10.2	1.36	2.57	4.2e-06	0.000323
5996	RGS1	regulator of G protein signaling 1 [Source:HGNC Symbol;Acc:HGNC:9991]	3.68	5.03	1.36	2.56	5.76e-05	0.00152
55975	KLHL7	kelch like family member 7 [Source:HGNC Symbol;Acc:HGNC:15646]	6.37	7.74	1.37	2.59	0.00381	0.0213
9603	NFE2L3	nuclear factor, erythroid 2 like 3 [Source:HGNC Symbol;Acc:HGNC:7783]	6.38	7.76	1.37	2.59	5.06e-05	0.00142
55905	RNF114	ring finger protein 114 [Source:HGNC Symbol;Acc:HGNC:13094]	8.55	9.92	1.37	2.58	9.25e-05	0.00197
664	BNIP3	BCL2 interacting protein 3 [Source:HGNC Symbol;Acc:HGNC:1084]	9.64	11	1.37	2.58	8.27e-06	0.000483
1316	KLF6	Kruppel like factor 6 [Source:HGNC Symbol;Acc:HGNC:2235]	9.34	10.7	1.38	2.61	3.99e-05	0.00123
4792	NFKBIA	NFKB inhibitor alpha [Source:HGNC Symbol;Acc:HGNC:7797]	10.9	12.3	1.38	2.61	0.000752	0.00734
3133	HLA-E	major histocompatibility complex, class I, E [Source:HGNC Symbol;Acc:HGNC:4962]	10.5	11.9	1.38	2.6	0.0103	0.0426
8878	SQSTM1	sequestosome 1 [Source:HGNC Symbol;Acc:HGNC:11280]	9.32	10.7	1.38	2.6	4.5e-05	0.00133
9034	CCRL2	C-C motif chemokine receptor like 2 [Source:HGNC Symbol;Acc:HGNC:1612]	6.88	8.28	1.39	2.63	0.0113	0.0452
25797	QPCT	glutaminyl-peptide cyclotransferase [Source:HGNC Symbol;Acc:HGNC:9753]	8.04	9.43	1.39	2.62	0.0108	0.0439
3575	IL7R	interleukin 7 receptor [Source:HGNC Symbol;Acc:HGNC:6024]	6.28	7.67	1.39	2.62	0.00818	0.0363
5764	PTN	pleiotrophin [Source:HGNC Symbol;Acc:HGNC:9630]	4.55	5.94	1.39	2.62	8.03e-05	0.0018
9751	SNPH	syntaphilin [Source:HGNC Symbol;Acc:HGNC:15931]	5.54	6.93	1.39	2.62	0.000202	0.0033
1909	EDNRA	endothelin receptor type A [Source:HGNC Symbol;Acc:HGNC:3179]	5.58	6.98	1.4	2.64	0.000445	0.00526
4277	MICB	MHC class I polypeptide-related sequence B [Source:HGNC Symbol;Acc:HGNC:7091]	8.58	9.98	1.4	2.64	0.00361	0.0207
7378	UPP1	uridine phosphorylase 1 [Source:HGNC Symbol;Acc:HGNC:12576]	7.47	8.87	1.4	2.64	0.00225	0.015
7050	TGIF1	TGFB induced factor homeobox 1 [Source:HGNC Symbol;Acc:HGNC:11776]	8.43	9.83	1.4	2.63	1.23e-06	0.000177
51278	IER5	immediate early response 5 [Source:HGNC Symbol;Acc:HGNC:5393]	8.77	10.2	1.41	2.67	1.75e-05	0.000762
7984	ARHGEF5	Rho guanine nucleotide exchange factor 5 [Source:HGNC Symbol;Acc:HGNC:13209]	6.42	7.83	1.41	2.67	3.73e-06	0.000316
1236	CCR7	C-C motif chemokine receptor 7 [Source:HGNC Symbol;Acc:HGNC:1608]	4.78	6.19	1.41	2.66	5.49e-05	0.00147
8915	BCL10	B-cell CLL/lymphoma 10 [Source:HGNC Symbol;Acc:HGNC:989]	9.55	11	1.41	2.65	6.47e-06	0.000419
272	AMPD3	adenosine monophosphate deaminase 3 [Source:HGNC Symbol;Acc:HGNC:470]	5.61	7.03	1.42	2.68	1.88e-05	0.000782
54836	BSPRY	B-box and SPRY domain containing [Source:HGNC Symbol;Acc:HGNC:18232]	7.42	8.84	1.42	2.68	0.00281	0.0175
3135	HLA-G	major histocompatibility complex, class I, G [Source:HGNC Symbol;Acc:HGNC:4964]	8.94	10.4	1.42	2.67	0.000451	0.00529
4929	NR4A2	nuclear receptor subfamily 4 group A member 2 [Source:HGNC Symbol;Acc:HGNC:7981]	4.56	5.98	1.42	2.67	2.42e-05	0.000908
3099	HK2	hexokinase 2 [Source:HGNC Symbol;Acc:HGNC:4923]	7.82	9.25	1.43	2.7	0.000214	0.00343
146227	BEAN1	brain expressed associated with NEDD4 1 [Source:HGNC Symbol;Acc:HGNC:24160]	3.78	5.2	1.43	2.69	1.28e-06	0.000182
6506	SLC1A2	solute carrier family 1 member 2 [Source:HGNC Symbol;Acc:HGNC:10940]	4.47	5.9	1.43	2.69	0.00683	0.0319
23052	ENDOD1	endonuclease domain containing 1 [Source:HGNC Symbol;Acc:HGNC:29129]	6.42	7.86	1.44	2.72	0.000123	0.00236
9903	KLHL21	kelch like family member 21 [Source:HGNC Symbol;Acc:HGNC:29041]	6.32	7.76	1.44	2.72	0.000118	0.00232
9582	APOBEC3B	apolipoprotein B mRNA editing enzyme catalytic subunit 3B [Source:HGNC Symbol;Acc:HGNC:17352]	6.09	7.53	1.44	2.71	5.59e-05	0.00148
29760	BLNK	B-cell linker [Source:HGNC Symbol;Acc:HGNC:14211]	5.8	7.25	1.45	2.74	5.98e-05	0.00153
3429	IFI27	interferon alpha inducible protein 27 [Source:HGNC Symbol;Acc:HGNC:5397]	11.1	12.5	1.45	2.73	0.0123	0.0477
55008	HERC6	HECT and RLD domain containing E3 ubiquitin protein ligase family member 6 [Source:HGNC Symbol;Acc:HGNC:26072]	7.73	9.2	1.46	2.76	0.00587	0.0288
3159	HMGA1	high mobility group AT-hook 1 [Source:HGNC Symbol;Acc:HGNC:5010]	5.66	7.12	1.46	2.75	2.51e-06	0.000254
80830	APOL6	apolipoprotein L6 [Source:HGNC Symbol;Acc:HGNC:14870]	4.51	5.96	1.46	2.74	0.00165	0.0122
59272	ACE2	angiotensin I converting enzyme 2 [Source:HGNC Symbol;Acc:HGNC:13557]	4.29	5.76	1.47	2.77	0.00122	0.01
1318	SLC31A2	solute carrier family 31 member 2 [Source:HGNC Symbol;Acc:HGNC:11017]	8.21	9.69	1.48	2.8	2.68e-05	0.000963
4860	PNP	purine nucleoside phosphorylase [Source:HGNC Symbol;Acc:HGNC:7892]	7.73	9.21	1.48	2.8	3.32e-05	0.00109
7096	TLR1	toll like receptor 1 [Source:HGNC Symbol;Acc:HGNC:11847]	5.06	6.54	1.48	2.79	0.0031	0.0187
7345	UCHL1	ubiquitin C-terminal hydrolase L1 [Source:HGNC Symbol;Acc:HGNC:12513]	7.37	8.85	1.49	2.8	0.00441	0.0236
79605	PGBD5	piggyBac transposable element derived 5 [Source:HGNC Symbol;Acc:HGNC:19405]	5.36	6.85	1.5	2.83	0.00212	0.0144
1906	EDN1	endothelin 1 [Source:HGNC Symbol;Acc:HGNC:3176]	8.18	9.69	1.51	2.85	8.13e-05	0.00182
85236	HIST1H2BK	histone cluster 1 H2B family member k [Source:HGNC Symbol;Acc:HGNC:13954]	9.2	10.7	1.51	2.85	7.92e-05	0.00178
399	RHOH	ras homolog family member H [Source:HGNC Symbol;Acc:HGNC:686]	4.86	6.36	1.51	2.84	0.000517	0.00582
914	CD2	CD2 molecule [Source:HGNC Symbol;Acc:HGNC:1639]	4.66	6.17	1.51	2.84	0.00736	0.0338
10797	MTHFD2	methylenetetrahydrofolate dehydrogenase (NADP+ dependent) 2, methenyltetrahydrofolate cyclohydrolase [Source:HGNC Symbol;Acc:HGNC:7434]	8.7	10.2	1.52	2.88	0.000443	0.00524
2495	FTH1	ferritin heavy chain 1 [Source:HGNC Symbol;Acc:HGNC:3976]	11.4	12.9	1.52	2.87	6.45e-05	0.0016
5214	PFKP	phosphofructokinase, platelet [Source:HGNC Symbol;Acc:HGNC:8878]	8.16	9.68	1.52	2.86	0.00288	0.0178
8349	HIST2H2BE	histone cluster 2 H2B family member e [Source:HGNC Symbol;Acc:HGNC:4760]	5.54	7.07	1.53	2.88	0.000974	0.00865
9123	SLC16A3	solute carrier family 16 member 3 [Source:HGNC Symbol;Acc:HGNC:10924]	7.69	9.24	1.55	2.94	0.000523	0.00584
9015	TAF1A	TATA-box binding protein associated factor, RNA polymerase I subunit A [Source:HGNC Symbol;Acc:HGNC:11532]	4.21	5.76	1.55	2.92	0.000301	0.00418
3696	ITGB8	integrin subunit beta 8 [Source:HGNC Symbol;Acc:HGNC:6163]	4.49	6.07	1.58	2.99	0.00324	0.0193
11254	SLC6A14	solute carrier family 6 member 14 [Source:HGNC Symbol;Acc:HGNC:11047]	11.2	12.8	1.59	3.01	0.00115	0.0096
54704	PDP1	pyruvate dehyrogenase phosphatase catalytic subunit 1 [Source:HGNC Symbol;Acc:HGNC:9279]	6.94	8.55	1.61	3.06	0.00059	0.00627
81894	SLC25A28	solute carrier family 25 member 28 [Source:HGNC Symbol;Acc:HGNC:23472]	5.2	6.82	1.61	3.06	1.8e-07	7.11e-05
2247	FGF2	fibroblast growth factor 2 [Source:HGNC Symbol;Acc:HGNC:3676]	4.22	5.83	1.61	3.05	0.0102	0.0423
2643	GCH1	GTP cyclohydrolase 1 [Source:HGNC Symbol;Acc:HGNC:4193]	8.43	10.1	1.62	3.08	2.95e-05	0.00103
4082	MARCKS	myristoylated alanine rich protein kinase C substrate [Source:HGNC Symbol;Acc:HGNC:6759]	7.01	8.64	1.62	3.08	0.000391	0.00489
8542	APOL1	apolipoprotein L1 [Source:HGNC Symbol;Acc:HGNC:618]	5.5	7.12	1.62	3.07	0.0002	0.00329
29909	GPR171	G protein-coupled receptor 171 [Source:HGNC Symbol;Acc:HGNC:30057]	3.91	5.54	1.63	3.1	0.00373	0.021
3600	IL15	interleukin 15 [Source:HGNC Symbol;Acc:HGNC:5977]	5.7	7.34	1.63	3.1	0.00167	0.0124
54972	TMEM132A	transmembrane protein 132A [Source:HGNC Symbol;Acc:HGNC:31092]	6.05	7.68	1.63	3.1	2.36e-05	0.000893
3001	GZMA	granzyme A [Source:HGNC Symbol;Acc:HGNC:4708]	4.23	5.86	1.63	3.09	0.00431	0.0232
5880	RAC2	ras-related C3 botulinum toxin substrate 2 (rho family, small GTP binding protein Rac2) [Source:HGNC Symbol;Acc:HGNC:9802]	7.55	9.18	1.63	3.09	0.00204	0.0141
9317	PTER	phosphotriesterase related [Source:HGNC Symbol;Acc:HGNC:9590]	7.93	9.55	1.63	3.09	6.89e-06	0.000427
3431	SP110	SP110 nuclear body protein [Source:HGNC Symbol;Acc:HGNC:5401]	6.8	8.45	1.65	3.14	3.17e-05	0.00107
7538	ZFP36	ZFP36 ring finger protein [Source:HGNC Symbol;Acc:HGNC:12862]	7.12	8.77	1.65	3.14	7.2e-07	0.00013
29923	HILPDA	hypoxia inducible lipid droplet associated [Source:HGNC Symbol;Acc:HGNC:28859]	6.93	8.58	1.65	3.13	6.84e-06	0.000427
874	CBR3	carbonyl reductase 3 [Source:HGNC Symbol;Acc:HGNC:1549]	6.76	8.43	1.66	3.17	6.32e-05	0.00159
28639	NA	NA	5.7	7.36	1.66	3.16	0.0118	0.0464
3486	IGFBP3	insulin like growth factor binding protein 3 [Source:HGNC Symbol;Acc:HGNC:5472]	7.98	9.65	1.67	3.19	0.00054	0.00595
526	ATP6V1B2	ATPase H+ transporting V1 subunit B2 [Source:HGNC Symbol;Acc:HGNC:854]	9.13	10.8	1.67	3.19	0.000561	0.00609
9734	HDAC9	histone deacetylase 9 [Source:HGNC Symbol;Acc:HGNC:14065]	6.42	8.09	1.67	3.18	0.00195	0.0136
55540	IL17RB	interleukin 17 receptor B [Source:HGNC Symbol;Acc:HGNC:18015]	5.38	7.07	1.68	3.21	0.00191	0.0135
2920	CXCL2	C-X-C motif chemokine ligand 2 [Source:HGNC Symbol;Acc:HGNC:4603]	11.2	12.8	1.68	3.2	0.000581	0.00624
6279	S100A8	S100 calcium binding protein A8 [Source:HGNC Symbol;Acc:HGNC:10498]	9.57	11.2	1.68	3.19	0.00923	0.0394
64127	NOD2	nucleotide binding oligomerization domain containing 2 [Source:HGNC Symbol;Acc:HGNC:5331]	4.15	5.86	1.7	3.25	9.1e-05	0.00196
5352	PLOD2	procollagen-lysine,2-oxoglutarate 5-dioxygenase 2 [Source:HGNC Symbol;Acc:HGNC:9082]	8.52	10.2	1.71	3.27	4.13e-06	0.000323
26872	STEAP1	STEAP family member 1 [Source:HGNC Symbol;Acc:HGNC:11378]	6.65	8.37	1.72	3.29	0.0131	0.0497
1390	CREM	cAMP responsive element modulator [Source:HGNC Symbol;Acc:HGNC:2352]	6.8	8.53	1.73	3.33	2.64e-06	0.000261
25939	SAMHD1	SAM and HD domain containing deoxynucleoside triphosphate triphosphohydrolase 1 [Source:HGNC Symbol;Acc:HGNC:15925]	6.23	7.97	1.74	3.34	0.000572	0.00618
10318	TNIP1	TNFAIP3 interacting protein 1 [Source:HGNC Symbol;Acc:HGNC:16903]	9.21	10.9	1.74	3.33	8.13e-06	0.000477
4502	MT2A	metallothionein 2A [Source:HGNC Symbol;Acc:HGNC:7406]	12.6	14.4	1.75	3.37	0.000274	0.00396
7718	ZNF165	zinc finger protein 165 [Source:HGNC Symbol;Acc:HGNC:12953]	6.18	7.93	1.75	3.36	1.42e-05	0.000683
51762	RAB8B	RAB8B, member RAS oncogene family [Source:HGNC Symbol;Acc:HGNC:30273]	5.92	7.69	1.77	3.41	0.000219	0.00348
2026	ENO2	enolase 2 [Source:HGNC Symbol;Acc:HGNC:3353]	6.14	7.92	1.78	3.44	6.66e-06	0.00042
10791	VAMP5	vesicle associated membrane protein 5 [Source:HGNC Symbol;Acc:HGNC:12646]	6.1	7.9	1.79	3.47	4.56e-05	0.00134
5699	PSMB10	proteasome subunit beta 10 [Source:HGNC Symbol;Acc:HGNC:9538]	8.47	10.3	1.8	3.48	0.00415	0.0226
5919	RARRES2	retinoic acid receptor responder 2 [Source:HGNC Symbol;Acc:HGNC:9868]	7.78	9.57	1.8	3.47	0.00946	0.0401
634	CEACAM1	carcinoembryonic antigen related cell adhesion molecule 1 [Source:HGNC Symbol;Acc:HGNC:1814]	6.36	8.16	1.81	3.5	9.8e-06	0.000534
9732	DOCK4	dedicator of cytokinesis 4 [Source:HGNC Symbol;Acc:HGNC:19192]	6.36	8.17	1.81	3.5	0.00268	0.017
55509	BATF3	basic leucine zipper ATF-like transcription factor 3 [Source:HGNC Symbol;Acc:HGNC:28915]	5.21	7.03	1.82	3.53	2.11e-05	0.000838
51513	ETV7	ETS variant 7 [Source:HGNC Symbol;Acc:HGNC:18160]	6.11	7.95	1.83	3.56	0.000405	0.00499
80271	ITPKC	inositol-trisphosphate 3-kinase C [Source:HGNC Symbol;Acc:HGNC:14897]	6.28	8.11	1.83	3.55	3.11e-06	0.000291
3017	HIST1H2BD	histone cluster 1 H2B family member d [Source:HGNC Symbol;Acc:HGNC:4747]	6.48	8.33	1.85	3.61	3.16e-05	0.00107
51734	MSRB1	methionine sulfoxide reductase B1 [Source:HGNC Symbol;Acc:HGNC:14133]	9.17	11	1.86	3.63	4.56e-05	0.00134
9308	CD83	CD83 molecule [Source:HGNC Symbol;Acc:HGNC:1703]	7.13	8.99	1.86	3.62	0.00157	0.0118
5359	PLSCR1	phospholipid scramblase 1 [Source:HGNC Symbol;Acc:HGNC:9092]	9.3	11.2	1.87	3.66	6.38e-05	0.0016
27071	DAPP1	dual adaptor of phosphotyrosine and 3-phosphoinositides 1 [Source:HGNC Symbol;Acc:HGNC:16500]	5.07	6.95	1.88	3.68	3.26e-05	0.00108
5328	PLAU	plasminogen activator, urokinase [Source:HGNC Symbol;Acc:HGNC:9052]	6.84	8.73	1.89	3.7	0.000698	0.00703
55281	TMEM140	transmembrane protein 140 [Source:HGNC Symbol;Acc:HGNC:21870]	6.65	8.55	1.9	3.74	0.000272	0.00395
55785	FGD6	FYVE, RhoGEF and PH domain containing 6 [Source:HGNC Symbol;Acc:HGNC:21740]	6.19	8.09	1.9	3.72	6.78e-07	0.000129
771	CA12	carbonic anhydrase 12 [Source:HGNC Symbol;Acc:HGNC:1371]	6.13	8.04	1.91	3.77	0.000511	0.00577
3587	IL10RA	interleukin 10 receptor subunit alpha [Source:HGNC Symbol;Acc:HGNC:5964]	4.95	6.86	1.91	3.76	0.000271	0.00394
80149	ZC3H12A	zinc finger CCCH-type containing 12A [Source:HGNC Symbol;Acc:HGNC:26259]	6.11	8.02	1.91	3.76	2.96e-06	0.000284
28984	RGCC	regulator of cell cycle [Source:HGNC Symbol;Acc:HGNC:20369]	7.34	9.26	1.92	3.79	0.00481	0.0251
1520	CTSS	cathepsin S [Source:HGNC Symbol;Acc:HGNC:2545]	9.81	11.7	1.92	3.78	0.00247	0.0161
79689	STEAP4	STEAP4 metalloreductase [Source:HGNC Symbol;Acc:HGNC:21923]	5.63	7.56	1.93	3.81	0.000997	0.00879
2669	GEM	GTP binding protein overexpressed in skeletal muscle [Source:HGNC Symbol;Acc:HGNC:4234]	5.38	7.31	1.93	3.8	0.00451	0.024
7076	TIMP1	TIMP metallopeptidase inhibitor 1 [Source:HGNC Symbol;Acc:HGNC:11820]	10.6	12.5	1.93	3.8	0.00477	0.025
8638	OASL	2'-5'-oligoadenylate synthetase like [Source:HGNC Symbol;Acc:HGNC:8090]	4.86	6.78	1.93	3.8	1.13e-05	0.000593
55454	CSGALNACT2	chondroitin sulfate N-acetylgalactosaminyltransferase 2 [Source:HGNC Symbol;Acc:HGNC:24292]	7.1	9.04	1.94	3.83	3.24e-05	0.00108
80723	SLC35G2	solute carrier family 35 member G2 [Source:HGNC Symbol;Acc:HGNC:28480]	4.46	6.4	1.94	3.83	0.000234	0.00365
5898	RALA	RAS like proto-oncogene A [Source:HGNC Symbol;Acc:HGNC:9839]	9.86	11.8	1.96	3.9	9.38e-06	0.000523
6367	CCL22	C-C motif chemokine ligand 22 [Source:HGNC Symbol;Acc:HGNC:10621]	5.88	7.85	1.96	3.9	0.000266	0.00392
55601	DDX60	DExD/H-box helicase 60 [Source:HGNC Symbol;Acc:HGNC:25942]	7.69	9.65	1.96	3.89	0.00112	0.00949
958	CD40	CD40 molecule [Source:HGNC Symbol;Acc:HGNC:11919]	6.41	8.36	1.96	3.88	3.07e-05	0.00105
79772	MCTP1	multiple C2 and transmembrane domain containing 1 [Source:HGNC Symbol;Acc:HGNC:26183]	6.08	8.05	1.97	3.91	0.00201	0.014
3717	JAK2	Janus kinase 2 [Source:HGNC Symbol;Acc:HGNC:6192]	4.87	6.85	1.98	3.94	7.88e-08	5.09e-05
6772	STAT1	signal transducer and activator of transcription 1 [Source:HGNC Symbol;Acc:HGNC:11362]	9.76	11.7	1.98	3.93	0.0034	0.0199
3673	ITGA2	integrin subunit alpha 2 [Source:HGNC Symbol;Acc:HGNC:6137]	9.62	11.6	1.99	3.96	0.000767	0.00743
79627	OGFRL1	opioid growth factor receptor like 1 [Source:HGNC Symbol;Acc:HGNC:21378]	6.62	8.62	2	4	1.12e-05	0.000591
9435	CHST2	carbohydrate sulfotransferase 2 [Source:HGNC Symbol;Acc:HGNC:1970]	6.07	8.07	2	4	0.000169	0.00291
6398	SECTM1	secreted and transmembrane 1 [Source:HGNC Symbol;Acc:HGNC:10707]	7.06	9.06	2	3.99	4.32e-06	0.000325
107984936	NA	NA	7.25	9.26	2.01	4.04	4.42e-05	0.00131
962	CD48	CD48 molecule [Source:HGNC Symbol;Acc:HGNC:1683]	6.77	8.79	2.01	4.04	0.0084	0.0369
9589	WTAP	WT1 associated protein [Source:HGNC Symbol;Acc:HGNC:16846]	8.04	10	2.01	4.01	6.45e-07	0.000129
4316	MMP7	matrix metallopeptidase 7 [Source:HGNC Symbol;Acc:HGNC:7174]	9.62	11.7	2.03	4.09	0.00991	0.0415
54739	XAF1	XIAP associated factor 1 [Source:HGNC Symbol;Acc:HGNC:30932]	5.83	7.86	2.03	4.09	0.00661	0.0313
1326	MAP3K8	mitogen-activated protein kinase kinase kinase 8 [Source:HGNC Symbol;Acc:HGNC:6860]	6.23	8.26	2.03	4.08	0.0031	0.0187
3791	KDR	kinase insert domain receptor [Source:HGNC Symbol;Acc:HGNC:6307]	7.06	9.08	2.03	4.07	0.000468	0.00542
25816	TNFAIP8	TNF alpha induced protein 8 [Source:HGNC Symbol;Acc:HGNC:17260]	9.15	11.2	2.04	4.12	4.23e-06	0.000323
8061	FOSL1	FOS like 1, AP-1 transcription factor subunit [Source:HGNC Symbol;Acc:HGNC:13718]	4.07	6.12	2.04	4.11	1.08e-06	0.000168
684	BST2	bone marrow stromal cell antigen 2 [Source:HGNC Symbol;Acc:HGNC:1119]	5.64	7.69	2.05	4.15	0.00573	0.0284
51083	GAL	galanin and GMAP prepropeptide [Source:HGNC Symbol;Acc:HGNC:4114]	5.11	7.18	2.07	4.19	0.00274	0.0172
7031	TFF1	trefoil factor 1 [Source:HGNC Symbol;Acc:HGNC:11755]	5.04	7.11	2.08	4.22	1.62e-05	0.000727
11010	GLIPR1	GLI pathogenesis related 1 [Source:HGNC Symbol;Acc:HGNC:17001]	6.09	8.19	2.09	4.26	0.000467	0.00542
127544	RNF19B	ring finger protein 19B [Source:HGNC Symbol;Acc:HGNC:26886]	7.58	9.7	2.12	4.35	6.53e-06	0.000419
6347	CCL2	C-C motif chemokine ligand 2 [Source:HGNC Symbol;Acc:HGNC:10618]	11.4	13.5	2.12	4.34	2.46e-06	0.000254
64135	IFIH1	interferon induced with helicase C domain 1 [Source:HGNC Symbol;Acc:HGNC:18873]	7.23	9.37	2.14	4.42	0.000144	0.00264
64866	CDCP1	CUB domain containing protein 1 [Source:HGNC Symbol;Acc:HGNC:24357]	7.41	9.55	2.15	4.42	3.89e-05	0.00121
9590	AKAP12	A-kinase anchoring protein 12 [Source:HGNC Symbol;Acc:HGNC:370]	4.17	6.32	2.16	4.46	0.000154	0.00274
3976	LIF	LIF, interleukin 6 family cytokine [Source:HGNC Symbol;Acc:HGNC:6596]	6.31	8.5	2.19	4.57	3.45e-05	0.0011
8412	BCAR3	breast cancer anti-estrogen resistance 3 [Source:HGNC Symbol;Acc:HGNC:973]	6.39	8.58	2.19	4.57	0.001	0.00881
3371	TNC	tenascin C [Source:HGNC Symbol;Acc:HGNC:5318]	7.54	9.73	2.19	4.56	1.5e-06	0.000196
10184	LHFPL2	LHFPL tetraspan subfamily member 2 [Source:HGNC Symbol;Acc:HGNC:6588]	6.27	8.46	2.2	4.58	5.33e-05	0.00145
3601	IL15RA	interleukin 15 receptor subunit alpha [Source:HGNC Symbol;Acc:HGNC:5978]	6.74	8.95	2.21	4.63	1.25e-07	6.15e-05
27324	TOX3	TOX high mobility group box family member 3 [Source:HGNC Symbol;Acc:HGNC:11972]	6.58	8.8	2.22	4.67	0.00382	0.0213
3430	IFI35	interferon induced protein 35 [Source:HGNC Symbol;Acc:HGNC:5399]	7.04	9.27	2.23	4.68	0.000557	0.00607
57823	SLAMF7	SLAM family member 7 [Source:HGNC Symbol;Acc:HGNC:21394]	6.6	8.85	2.25	4.77	0.00664	0.0314
6283	S100A12	S100 calcium binding protein A12 [Source:HGNC Symbol;Acc:HGNC:10489]	4.28	6.56	2.27	4.84	0.000264	0.00391
9976	CLEC2B	C-type lectin domain family 2 member B [Source:HGNC Symbol;Acc:HGNC:2053]	6.8	9.07	2.27	4.82	0.00257	0.0165
4599	MX1	MX dynamin like GTPase 1 [Source:HGNC Symbol;Acc:HGNC:7532]	8.54	10.8	2.28	4.84	0.00182	0.013
56892	C8orf4	chromosome 8 open reading frame 4 [Source:HGNC Symbol;Acc:HGNC:1357]	8.21	10.5	2.29	4.88	0.000496	0.00565
10148	EBI3	Epstein-Barr virus induced 3 [Source:HGNC Symbol;Acc:HGNC:3129]	4.26	6.55	2.29	4.87	0.000111	0.00222
84560	MT4	metallothionein 4 [Source:HGNC Symbol;Acc:HGNC:18705]	8.75	11	2.3	4.93	0.00131	0.0105
2745	GLRX	glutaredoxin [Source:HGNC Symbol;Acc:HGNC:4330]	9.82	12.2	2.34	5.05	1.35e-06	0.000186
4939	OAS2	2'-5'-oligoadenylate synthetase 2 [Source:HGNC Symbol;Acc:HGNC:8087]	5.34	7.7	2.36	5.14	9.21e-05	0.00197
23764	MAFF	MAF bZIP transcription factor F [Source:HGNC Symbol;Acc:HGNC:6780]	9.05	11.4	2.4	5.29	2.59e-07	8.49e-05
60489	APOBEC3G	apolipoprotein B mRNA editing enzyme catalytic subunit 3G [Source:HGNC Symbol;Acc:HGNC:17357]	6.72	9.11	2.4	5.27	0.00388	0.0216
51312	SLC25A37	solute carrier family 25 member 37 [Source:HGNC Symbol;Acc:HGNC:29786]	5	7.41	2.41	5.33	6.07e-06	0.000406
64208	POPDC3	popeye domain containing 3 [Source:HGNC Symbol;Acc:HGNC:17649]	5.19	7.61	2.41	5.33	0.000223	0.00353
10561	IFI44	interferon induced protein 44 [Source:HGNC Symbol;Acc:HGNC:16938]	6.51	8.93	2.42	5.35	0.000428	0.00514
390	RND3	Rho family GTPase 3 [Source:HGNC Symbol;Acc:HGNC:671]	10.2	12.6	2.43	5.4	2.51e-05	0.000919
8519	IFITM1	interferon induced transmembrane protein 1 [Source:HGNC Symbol;Acc:HGNC:5412]	9.94	12.4	2.44	5.41	0.00985	0.0413
8743	TNFSF10	TNF superfamily member 10 [Source:HGNC Symbol;Acc:HGNC:11925]	9.73	12.2	2.46	5.49	0.00159	0.012
3977	LIFR	LIF receptor alpha [Source:HGNC Symbol;Acc:HGNC:6597]	4.08	6.55	2.48	5.56	1.44e-06	0.00019
27289	RND1	Rho family GTPase 1 [Source:HGNC Symbol;Acc:HGNC:18314]	8.34	10.9	2.51	5.71	0.00228	0.0151
8767	RIPK2	receptor interacting serine/threonine kinase 2 [Source:HGNC Symbol;Acc:HGNC:10020]	7.93	10.4	2.51	5.7	4.93e-07	0.000121
5698	PSMB9	proteasome subunit beta 9 [Source:HGNC Symbol;Acc:HGNC:9546]	9.06	11.6	2.51	5.69	0.00562	0.028
23586	DDX58	DExD/H-box helicase 58 [Source:HGNC Symbol;Acc:HGNC:19102]	6.08	8.61	2.53	5.79	2.19e-05	0.00086
23589	CARHSP1	calcium regulated heat stable protein 1 [Source:HGNC Symbol;Acc:HGNC:17150]	8.94	11.5	2.53	5.79	9.67e-05	0.00204
4050	LTB	lymphotoxin beta [Source:HGNC Symbol;Acc:HGNC:6711]	5.35	7.9	2.54	5.84	0.0013	0.0105
79370	BCL2L14	BCL2 like 14 [Source:HGNC Symbol;Acc:HGNC:16657]	5.1	7.66	2.56	5.91	0.000111	0.00222
51056	LAP3	leucine aminopeptidase 3 [Source:HGNC Symbol;Acc:HGNC:18449]	9.89	12.4	2.56	5.88	0.000437	0.00519
30001	ERO1A	endoplasmic reticulum oxidoreductase 1 alpha [Source:HGNC Symbol;Acc:HGNC:13280]	7.42	9.99	2.57	5.95	5.73e-08	4.35e-05
710	SERPING1	serpin family G member 1 [Source:HGNC Symbol;Acc:HGNC:1228]	8.3	10.9	2.57	5.93	0.00331	0.0196
6364	CCL20	C-C motif chemokine ligand 20 [Source:HGNC Symbol;Acc:HGNC:10619]	10.1	12.7	2.59	6.02	0.00635	0.0304
7127	TNFAIP2	TNF alpha induced protein 2 [Source:HGNC Symbol;Acc:HGNC:11895]	4.83	7.46	2.62	6.16	6.44e-05	0.0016
2919	CXCL1	C-X-C motif chemokine ligand 1 [Source:HGNC Symbol;Acc:HGNC:4602]	10.5	13.1	2.62	6.15	0.000377	0.0048
55013	MCUB	mitochondrial calcium uniporter dominant negative beta subunit [Source:HGNC Symbol;Acc:HGNC:26076]	8.82	11.4	2.62	6.13	2.87e-07	8.79e-05
56938	ARNTL2	aryl hydrocarbon receptor nuclear translocator like 2 [Source:HGNC Symbol;Acc:HGNC:18984]	6.94	9.58	2.64	6.25	1.29e-06	0.000182
10563	CXCL13	C-X-C motif chemokine ligand 13 [Source:HGNC Symbol;Acc:HGNC:10639]	3.9	6.53	2.64	6.22	0.000366	0.00472
3589	IL11	interleukin 11 [Source:HGNC Symbol;Acc:HGNC:5966]	6.06	8.73	2.67	6.37	0.0071	0.0329
29940	DSE	dermatan sulfate epimerase [Source:HGNC Symbol;Acc:HGNC:21144]	7.52	10.2	2.68	6.41	4.18e-05	0.00127
51365	PLA1A	phospholipase A1 member A [Source:HGNC Symbol;Acc:HGNC:17661]	4.55	7.26	2.7	6.52	0.000327	0.0044
79651	RHBDF2	rhomboid 5 homolog 2 [Source:HGNC Symbol;Acc:HGNC:20788]	5.44	8.13	2.7	6.48	3.61e-07	0.000101
6482	ST3GAL1	ST3 beta-galactoside alpha-2,3-sialyltransferase 1 [Source:HGNC Symbol;Acc:HGNC:10862]	6.9	9.64	2.74	6.69	3.02e-05	0.00105
1890	TYMP	thymidine phosphorylase [Source:HGNC Symbol;Acc:HGNC:3148]	6.94	9.67	2.74	6.68	1.46e-05	0.000691
2634	GBP2	guanylate binding protein 2 [Source:HGNC Symbol;Acc:HGNC:4183]	8.91	11.7	2.76	6.75	0.00049	0.0056
1577	CYP3A5	cytochrome P450 family 3 subfamily A member 5 [Source:HGNC Symbol;Acc:HGNC:2638]	4.12	6.9	2.78	6.89	1.17e-10	1.44e-06
5329	PLAUR	plasminogen activator, urokinase receptor [Source:HGNC Symbol;Acc:HGNC:9053]	8.4	11.2	2.79	6.93	0.000231	0.00362
10308	ZNF267	zinc finger protein 267 [Source:HGNC Symbol;Acc:HGNC:13060]	6.65	9.45	2.8	6.95	7.16e-09	1.25e-05
55350	VNN3	vanin 3 [Source:HGNC Symbol;Acc:HGNC:16431]	4.48	7.28	2.8	6.94	1.41e-06	0.00019
9595	CYTIP	cytohesin 1 interacting protein [Source:HGNC Symbol;Acc:HGNC:9506]	4.55	7.37	2.82	7.08	0.00553	0.0278
2710	GK	glycerol kinase [Source:HGNC Symbol;Acc:HGNC:4289]	6.62	9.44	2.82	7.06	0.000583	0.00625
80833	APOL3	apolipoprotein L3 [Source:HGNC Symbol;Acc:HGNC:14868]	5.05	7.88	2.83	7.1	0.0004	0.00496
8875	VNN2	vanin 2 [Source:HGNC Symbol;Acc:HGNC:12706]	4.55	7.4	2.85	7.21	0.00852	0.0373
5366	PMAIP1	phorbol-12-myristate-13-acetate-induced protein 1 [Source:HGNC Symbol;Acc:HGNC:9108]	8.21	11.1	2.88	7.38	1.56e-07	6.7e-05
1117	CHI3L2	chitinase 3 like 2 [Source:HGNC Symbol;Acc:HGNC:1933]	6.25	9.16	2.91	7.51	0.000153	0.00273
64859	NABP1	nucleic acid binding protein 1 [Source:HGNC Symbol;Acc:HGNC:26232]	4.44	7.36	2.92	7.57	3.91e-06	0.000323
4938	OAS1	2'-5'-oligoadenylate synthetase 1 [Source:HGNC Symbol;Acc:HGNC:8086]	6.15	9.1	2.95	7.74	1.37e-06	0.000186
1440	CSF3	colony stimulating factor 3 [Source:HGNC Symbol;Acc:HGNC:2438]	5.64	8.61	2.97	7.86	0.000388	0.00487
3576	CXCL8	C-X-C motif chemokine ligand 8 [Source:HGNC Symbol;Acc:HGNC:6025]	10.6	13.6	2.99	7.97	3.29e-05	0.00108
2537	IFI6	interferon alpha inducible protein 6 [Source:HGNC Symbol;Acc:HGNC:4054]	8.86	11.8	2.99	7.93	0.000752	0.00734
7185	TRAF1	TNF receptor associated factor 1 [Source:HGNC Symbol;Acc:HGNC:12031]	5.62	8.63	3	8.02	4.1e-08	4.19e-05
79644	SRD5A3	steroid 5 alpha-reductase 3 [Source:HGNC Symbol;Acc:HGNC:25812]	5.73	8.75	3.02	8.11	0.00162	0.0121
3552	IL1A	interleukin 1 alpha [Source:HGNC Symbol;Acc:HGNC:5991]	4.81	7.83	3.02	8.1	0.00504	0.0259
4940	OAS3	2'-5'-oligoadenylate synthetase 3 [Source:HGNC Symbol;Acc:HGNC:8088]	6.3	9.34	3.04	8.25	0.000146	0.00267
7052	TGM2	transglutaminase 2 [Source:HGNC Symbol;Acc:HGNC:11778]	6.25	9.33	3.08	8.47	1.58e-06	0.000201
9636	ISG15	ISG15 ubiquitin-like modifier [Source:HGNC Symbol;Acc:HGNC:4053]	8.28	11.4	3.09	8.5	0.00118	0.00983
6648	SOD2	superoxide dismutase 2 [Source:HGNC Symbol;Acc:HGNC:11180]	8.7	11.8	3.09	8.49	2.43e-05	0.000908
669	BPGM	bisphosphoglycerate mutase [Source:HGNC Symbol;Acc:HGNC:1093]	9.03	12.2	3.14	8.8	7.19e-07	0.00013
7133	TNFRSF1B	TNF receptor superfamily member 1B [Source:HGNC Symbol;Acc:HGNC:11917]	5.26	8.43	3.17	9.01	8.41e-05	0.00187
3659	IRF1	interferon regulatory factor 1 [Source:HGNC Symbol;Acc:HGNC:6116]	7.77	11	3.2	9.19	0.000321	0.00436
56300	IL36G	interleukin 36, gamma [Source:HGNC Symbol;Acc:HGNC:15741]	4.62	7.83	3.21	9.25	1.54e-05	0.000702
4843	NOS2	nitric oxide synthase 2 [Source:HGNC Symbol;Acc:HGNC:7873]	5.08	8.35	3.26	9.61	4.81e-10	2.95e-06
50486	G0S2	G0/G1 switch 2 [Source:HGNC Symbol;Acc:HGNC:30229]	6.35	9.62	3.26	9.58	0.00131	0.0105
952	CD38	CD38 molecule [Source:HGNC Symbol;Acc:HGNC:1667]	5.44	8.71	3.27	9.65	0.000282	0.00401
5724	PTAFR	platelet activating factor receptor [Source:HGNC Symbol;Acc:HGNC:9582]	5.54	8.83	3.29	9.79	6.45e-07	0.000129
133	ADM	adrenomedullin [Source:HGNC Symbol;Acc:HGNC:259]	7.45	10.8	3.33	10.1	7.04e-05	0.00167
9235	IL32	interleukin 32 [Source:HGNC Symbol;Acc:HGNC:16830]	7.38	10.7	3.36	10.3	0.000218	0.00348
28231	SLCO4A1	solute carrier organic anion transporter family member 4A1 [Source:HGNC Symbol;Acc:HGNC:10953]	5.05	8.41	3.36	10.2	9.6e-09	1.47e-05
6376	CX3CL1	C-X3-C motif chemokine ligand 1 [Source:HGNC Symbol;Acc:HGNC:10647]	7.38	10.8	3.38	10.4	4.36e-06	0.000326
1356	CP	ceruloplasmin [Source:HGNC Symbol;Acc:HGNC:2295]	6.2	9.61	3.41	10.6	0.00271	0.0171
467	ATF3	activating transcription factor 3 [Source:HGNC Symbol;Acc:HGNC:785]	6.87	10.3	3.42	10.7	2.34e-06	0.000247
6890	TAP1	transporter 1, ATP binding cassette subfamily B member [Source:HGNC Symbol;Acc:HGNC:43]	8.7	12.1	3.43	10.8	0.000211	0.0034
8942	KYNU	kynureninase [Source:HGNC Symbol;Acc:HGNC:6469]	7.71	11.2	3.46	11	6.03e-06	0.000406
7128	TNFAIP3	TNF alpha induced protein 3 [Source:HGNC Symbol;Acc:HGNC:11896]	7.41	10.9	3.48	11.2	2.79e-07	8.76e-05
8578	SCARF1	scavenger receptor class F member 1 [Source:HGNC Symbol;Acc:HGNC:16820]	3.83	7.33	3.49	11.3	1.58e-07	6.7e-05
3669	ISG20	interferon stimulated exonuclease gene 20 [Source:HGNC Symbol;Acc:HGNC:6130]	7.96	11.6	3.6	12.2	1.99e-06	0.000225
2633	GBP1	guanylate binding protein 1 [Source:HGNC Symbol;Acc:HGNC:4182]	9.15	12.8	3.61	12.2	0.000765	0.00743
7453	WARS	tryptophanyl-tRNA synthetase [Source:HGNC Symbol;Acc:HGNC:12729]	9.56	13.2	3.64	12.4	0.0022	0.0148
3437	IFIT3	interferon induced protein with tetratricopeptide repeats 3 [Source:HGNC Symbol;Acc:HGNC:5411]	7.81	11.5	3.66	12.6	0.000181	0.00308
2069	EREG	epiregulin [Source:HGNC Symbol;Acc:HGNC:3443]	3.99	7.71	3.73	13.2	0.011	0.0444
89795	NAV3	neuron navigator 3 [Source:HGNC Symbol;Acc:HGNC:15998]	4.42	8.27	3.85	14.4	1.46e-07	6.7e-05
1191	CLU	clusterin [Source:HGNC Symbol;Acc:HGNC:2095]	6.83	10.8	4	16	3.3e-05	0.00108
200315	APOBEC3A	apolipoprotein B mRNA editing enzyme catalytic subunit 3A [Source:HGNC Symbol;Acc:HGNC:17343]	4.79	8.81	4.02	16.2	1.06e-06	0.000167
2921	CXCL3	C-X-C motif chemokine ligand 3 [Source:HGNC Symbol;Acc:HGNC:4604]	8.35	12.4	4.02	16.2	4.23e-05	0.00128
8876	VNN1	vanin 1 [Source:HGNC Symbol;Acc:HGNC:12705]	4.63	8.66	4.03	16.3	0.00112	0.00949
7424	VEGFC	vascular endothelial growth factor C [Source:HGNC Symbol;Acc:HGNC:12682]	5.27	9.37	4.09	17.1	4.24e-06	0.000323
330	BIRC3	baculoviral IAP repeat containing 3 [Source:HGNC Symbol;Acc:HGNC:591]	6.46	10.6	4.14	17.6	1.36e-05	0.000668
9447	AIM2	absent in melanoma 2 [Source:HGNC Symbol;Acc:HGNC:357]	4.2	8.35	4.15	17.8	6.03e-09	1.23e-05
6351	CCL4	C-C motif chemokine ligand 4 [Source:HGNC Symbol;Acc:HGNC:10630]	6.9	11.1	4.17	18.1	0.00169	0.0125
10964	IFI44L	interferon induced protein 44 like [Source:HGNC Symbol;Acc:HGNC:17817]	5.08	9.27	4.19	18.2	0.00546	0.0276
5172	SLC26A4	solute carrier family 26 member 4 [Source:HGNC Symbol;Acc:HGNC:8818]	5.53	9.76	4.22	18.7	0.00121	0.00998
3433	IFIT2	interferon induced protein with tetratricopeptide repeats 2 [Source:HGNC Symbol;Acc:HGNC:5409]	6.76	11.1	4.32	20	2.31e-06	0.000247
4314	MMP3	matrix metallopeptidase 3 [Source:HGNC Symbol;Acc:HGNC:7173]	7.37	11.8	4.43	21.6	0.00405	0.0222
1847	DUSP5	dual specificity phosphatase 5 [Source:HGNC Symbol;Acc:HGNC:3071]	6.62	11.1	4.46	21.9	6.74e-07	0.000129
91543	RSAD2	radical S-adenosyl methionine domain containing 2 [Source:HGNC Symbol;Acc:HGNC:30908]	5.98	10.5	4.54	23.2	4.2e-05	0.00127
6318	SERPINB4	serpin family B member 4 [Source:HGNC Symbol;Acc:HGNC:10570]	5.56	10.4	4.87	29.2	4.96e-06	0.000362
50506	DUOX2	dual oxidase 2 [Source:HGNC Symbol;Acc:HGNC:13273]	5.26	10.2	4.91	30.2	5e-05	0.00141
10537	UBD	ubiquitin D [Source:HGNC Symbol;Acc:HGNC:18795]	8.83	13.8	4.99	31.9	0.00171	0.0126
1437	CSF2	colony stimulating factor 2 [Source:HGNC Symbol;Acc:HGNC:2434]	5.87	10.9	4.99	31.8	2.3e-05	0.000875
8710	SERPINB7	serpin family B member 7 [Source:HGNC Symbol;Acc:HGNC:13902]	7.32	12.3	5	32	0.000126	0.0024
5266	PI3	peptidase inhibitor 3 [Source:HGNC Symbol;Acc:HGNC:8947]	8.6	13.7	5.08	33.7	5.66e-07	0.000129
3569	IL6	interleukin 6 [Source:HGNC Symbol;Acc:HGNC:6018]	7.24	12.3	5.1	34.4	7.17e-05	0.00168
6354	CCL7	C-C motif chemokine ligand 7 [Source:HGNC Symbol;Acc:HGNC:10634]	4.68	9.79	5.11	34.6	3.56e-08	3.97e-05
51561	IL23A	interleukin 23 subunit alpha [Source:HGNC Symbol;Acc:HGNC:15488]	5.17	10.4	5.27	38.5	3.05e-09	9.36e-06
7130	TNFAIP6	TNF alpha induced protein 6 [Source:HGNC Symbol;Acc:HGNC:11898]	5.66	11.1	5.39	42	0.00229	0.0151
3553	IL1B	interleukin 1 beta [Source:HGNC Symbol;Acc:HGNC:5992]	6.22	11.9	5.66	50.4	0.000588	0.00627
6352	CCL5	C-C motif chemokine ligand 5 [Source:HGNC Symbol;Acc:HGNC:10632]	5.34	11.1	5.77	54.7	5.2e-05	0.00143
3620	IDO1	indoleamine 2,3-dioxygenase 1 [Source:HGNC Symbol;Acc:HGNC:6059]	7.11	13.8	6.66	101	0.000371	0.00476
4283	CXCL9	C-X-C motif chemokine ligand 9 [Source:HGNC Symbol;Acc:HGNC:7098]	6.1	13.3	7.15	142	0.000684	0.00694
3627	CXCL10	C-X-C motif chemokine ligand 10 [Source:HGNC Symbol;Acc:HGNC:10637]	6.4	13.7	7.26	153	0.000826	0.00781
6373	CXCL11	C-X-C motif chemokine ligand 11 [Source:HGNC Symbol;Acc:HGNC:10638]	4.51	13.1	8.57	379	0.000249	0.0038
6355	CCL8	C-C motif chemokine ligand 8 [Source:HGNC Symbol;Acc:HGNC:10635]	4.61	13.3	8.7	415	3.4e-08	3.97e-05

## Sheet: Supplementary Table 2
Hallmark gene set	Hallmark erichment p-value after Benjamini-Hochberg adjustment	Canonical pathway	Pathway enrichment p-value after Benjamini-Hochberg adjustment
HALLMARK_INTERFERON_GAMMA_RESPONSE	1.39418e-73	REACTOME_CYTOKINE_SIGNALING_IN_IMMUNE_SYSTEM	1.84653e-20
HALLMARK_TNFA_SIGNALING_VIA_NFKB	7.73063e-63	KEGG_CYTOKINE_CYTOKINE_RECEPTOR_INTERACTION	5.30548e-18
HALLMARK_INFLAMMATORY_RESPONSE	4.26767e-41	REACTOME_INTERFERON_ALPHA_BETA_SIGNALING	4.83685e-17
HALLMARK_INTERFERON_ALPHA_RESPONSE	9.68597e-37	REACTOME_INTERFERON_SIGNALING	1.51653e-16
HALLMARK_ALLOGRAFT_REJECTION	1.07025e-21	REACTOME_IMMUNE_SYSTEM	2.36158e-14
HALLMARK_IL6_JAK_STAT3_SIGNALING	2.11157e-15	NABA_SECRETED_FACTORS	8.65563e-14
HALLMARK_IL2_STAT5_SIGNALING	7.71409e-13	REACTOME_INTERFERON_GAMMA_SIGNALING	2.3144e-12
HALLMARK_COMPLEMENT	6.26489e-12	NABA_MATRISOME_ASSOCIATED	1.74587e-11
HALLMARK_APOPTOSIS	3.39442e-11	KEGG_NOD_LIKE_RECEPTOR_SIGNALING_PATHWAY	1.26104e-10
HALLMARK_HYPOXIA	1.41287e-10	REACTOME_CHEMOKINE_RECEPTORS_BIND_CHEMOKINES	1.97407e-10
HALLMARK_KRAS_SIGNALING_UP	1.88476e-10	PID_IL23_PATHWAY	2.49977e-10
HALLMARK_EPITHELIAL_MESENCHYMAL_TRANSITION	1.97485e-06	KEGG_TOLL_LIKE_RECEPTOR_SIGNALING_PATHWAY	2.29359e-09
HALLMARK_UV_RESPONSE_UP	6.16776e-05	NABA_MATRISOME	1.029e-08
HALLMARK_P53_PATHWAY	8.05289e-05	KEGG_CHEMOKINE_SIGNALING_PATHWAY	4.32692e-07
HALLMARK_GLYCOLYSIS	0.000442583	REACTOME_SIGNALING_BY_ILS	4.6683e-07
HALLMARK_MTORC1_SIGNALING	0.000575519	PID_IL12_2PATHWAY	7.54948e-07
HALLMARK_ESTROGEN_RESPONSE_LATE	0.0106044	KEGG_JAK_STAT_SIGNALING_PATHWAY	8.33178e-06
HALLMARK_CHOLESTEROL_HOMEOSTASIS	0.037405	KEGG_CYTOSOLIC_DNA_SENSING_PATHWAY	1.04207e-05
HALLMARK_MYC_TARGETS_V1	0.0851367	BIOCARTA_INFLAM_PATHWAY	1.80987e-05
HALLMARK_SPERMATOGENESIS	0.0910773	REACTOME_PEPTIDE_LIGAND_BINDING_RECEPTORS	4.21923e-05
HALLMARK_ESTROGEN_RESPONSE_EARLY	0.0943129	PID_IL27_PATHWAY	5.94036e-05
HALLMARK_REACTIVE_OXIGEN_SPECIES_PATHWAY	0.141312	KEGG_HEMATOPOIETIC_CELL_LINEAGE	0.000130321
HALLMARK_APICAL_SURFACE	0.193644	PID_NFKAPPAB_CANONICAL_PATHWAY	0.0001953
HALLMARK_E2F_TARGETS	0.193644	PID_TNF_PATHWAY	0.000532971
HALLMARK_OXIDATIVE_PHOSPHORYLATION	0.193644	BIOCARTA_IL10_PATHWAY	0.000638359
HALLMARK_ANGIOGENESIS	0.225735	PID_P53_DOWNSTREAM_PATHWAY	0.000656262
HALLMARK_ANDROGEN_RESPONSE	0.25333	REACTOME_INNATE_IMMUNE_SYSTEM	0.00083559
HALLMARK_COAGULATION	0.25333	ST_TUMOR_NECROSIS_FACTOR_PATHWAY	0.0013343
HALLMARK_UNFOLDED_PROTEIN_RESPONSE	0.299073	KEGG_RIG_I_LIKE_RECEPTOR_SIGNALING_PATHWAY	0.0015388
HALLMARK_TGF_BETA_SIGNALING	0.432425	REACTOME_RIG_I_MDA5_MEDIATED_INDUCTION_OF_IFN_ALPHA_BETA_PATHWAYS	0.0015388
HALLMARK_XENOBIOTIC_METABOLISM	0.483018	BIOCARTA_CYTOKINE_PATHWAY	0.001952
HALLMARK_HEDGEHOG_SIGNALING	0.510281	PID_CD40_PATHWAY	0.001952
HALLMARK_PI3K_AKT_MTOR_SIGNALING	0.590568	BIOCARTA_ERYTH_PATHWAY	0.00238539
HALLMARK_MYOGENESIS	0.619664	BIOCARTA_NFKB_PATHWAY	0.00238539
HALLMARK_MITOTIC_SPINDLE	0.861161	REACTOME_RIP_MEDIATED_NFKB_ACTIVATION_VIA_DAI	0.00238539
HALLMARK_WNT_BETA_CATENIN_SIGNALING	0.861161	BIOCARTA_IL1R_PATHWAY	0.00262872
HALLMARK_DNA_REPAIR	0.861161	BIOCARTA_IL17_PATHWAY	0.00304543
HALLMARK_G2M_CHECKPOINT	0.861161	BIOCARTA_IL22BP_PATHWAY	0.00304543
HALLMARK_APICAL_JUNCTION	0.861161	BIOCARTA_STEM_PATHWAY	0.00304543
HALLMARK_PANCREAS_BETA_CELLS	0.861161	PID_AP1_PATHWAY	0.00304543
HALLMARK_PROTEIN_SECRETION	0.921775	BIOCARTA_NTHI_PATHWAY	0.00332066
HALLMARK_BILE_ACID_METABOLISM	0.921775	PID_FRA_PATHWAY	0.00332066
HALLMARK_ADIPOGENESIS	0.932277	REACTOME_IL1_SIGNALING	0.00332066
HALLMARK_HEME_METABOLISM	0.932277	BIOCARTA_NO2IL12_PATHWAY	0.00516362
HALLMARK_KRAS_SIGNALING_DN	0.932277	BIOCARTA_TNFR2_PATHWAY	0.00516362
HALLMARK_NOTCH_SIGNALING	1	REACTOME_TRAF6_MEDIATED_NFKB_ACTIVATION	0.00516362
HALLMARK_MYC_TARGETS_V2	1	REACTOME_CLASS_A1_RHODOPSIN_LIKE_RECEPTORS	0.00525174
HALLMARK_FATTY_ACID_METABOLISM	1	KEGG_LEISHMANIA_INFECTION	0.00547634
HALLMARK_UV_RESPONSE_DN	1	REACTOME_IL_6_SIGNALING	0.00591747
HALLMARK_PEROXISOME	1	BIOCARTA_TID_PATHWAY	0.00615257
		PID_TOLL_ENDOGENOUS_PATHWAY	0.00615257
		REACTOME_TAK1_ACTIVATES_NFKB_BY_PHOSPHORYLATION_AND_ACTIVATION_OF_IKKS_COMPLEX	0.00615257
		REACTOME_TRIF_MEDIATED_TLR3_SIGNALING	0.00715623
		BIOCARTA_EPONFKB_PATHWAY	0.00821632
		REACTOME_ACTIVATED_TLR4_SIGNALLING	0.00834951
		REACTOME_P75NTR_SIGNALS_VIA_NFKB	0.0113857
		REACTOME_TOLL_RECEPTOR_CASCADES	0.0113857
		KEGG_B_CELL_RECEPTOR_SIGNALING_PATHWAY	0.0114892
		PID_ATF2_PATHWAY	0.0126944
		PID_INTEGRIN_A9B1_PATHWAY	0.0146798
		REACTOME_REGULATION_OF_IFNG_SIGNALING	0.0149438
		KEGG_GRAFT_VERSUS_HOST_DISEASE	0.0172979
		BIOCARTA_GRANULOCYTES_PATHWAY	0.0187832
		BIOCARTA_RANKL_PATHWAY	0.0187832
		BIOCARTA_CD40_PATHWAY	0.0187832
		SA_MMP_CYTOKINE_CONNECTION	0.0187832
		PID_HIV_NEF_PATHWAY	0.0187832
		REACTOME_GROWTH_HORMONE_RECEPTOR_SIGNALING	0.0197889
		REACTOME_NFKB_AND_MAP_KINASES_ACTIVATION_MEDIATED_BY_TLR4_SIGNALING_REPERTOIRE	0.0213821
		BIOCARTA_RELA_PATHWAY	0.0235777
		BIOCARTA_IL2RB_PATHWAY	0.0236668
		PID_GMCSF_PATHWAY	0.0236668
		KEGG_TYPE_I_DIABETES_MELLITUS	0.0259398
		PID_IFNG_PATHWAY	0.0259398
		REACTOME_NEGATIVE_REGULATORS_OF_RIG_I_MDA5_SIGNALING	0.0259398
		REACTOME_NOD1_2_SIGNALING_PATHWAY	0.0259398
		BIOCARTA_LAIR_PATHWAY	0.0274761
		PID_ANTHRAX_PATHWAY	0.0274761
		NABA_ECM_REGULATORS	0.0280218
		KEGG_APOPTOSIS	0.0287893
		REACTOME_NUCLEOTIDE_BINDING_DOMAIN_LEUCINE_RICH_REPEAT_CONTAINING_RECEPTOR_NLR_SIGNALING_PATHWAYS	0.0319318
		REACTOME_ACTIVATION_OF_NF_KAPPAB_IN_B_CELLS	0.0323305
		BIOCARTA_HIVNEF_PATHWAY	0.0390419
		REACTOME_DOWNSTREAM_TCR_SIGNALING	0.0390419
		BIOCARTA_FREE_PATHWAY	0.0402024
		PID_VEGF_VEGFR_PATHWAY	0.0402024
		REACTOME_VEGF_LIGAND_RECEPTOR_INTERACTIONS	0.0402024
		REACTOME_NFKB_IS_ACTIVATED_AND_SIGNALS_SURVIVAL	0.0402024
		REACTOME_ANTIVIRAL_MECHANISM_BY_IFN_STIMULATED_GENES	0.0446302
		REACTOME_G_ALPHA_I_SIGNALLING_EVENTS	0.0446302
		REACTOME_SIGNALING_BY_THE_B_CELL_RECEPTOR_BCR	0.0469818
		PID_IL1_PATHWAY	0.047761
		REACTOME_PACKAGING_OF_TELOMERE_ENDS	0.047761
		PID_NFAT_TFPATHWAY	0.0502359
		REACTOME_TCR_SIGNALING	0.0502359
		BIOCARTA_RNA_PATHWAY	0.0503035
		BIOCARTA_SODD_PATHWAY	0.0503035
		PID_INTEGRIN1_PATHWAY	0.0503035
		BIOCARTA_DEATH_PATHWAY	0.051745
		KEGG_ADIPOCYTOKINE_SIGNALING_PATHWAY	0.0535218
		KEGG_EPITHELIAL_CELL_SIGNALING_IN_HELICOBACTER_PYLORI_INFECTION	0.0564934
		KEGG_ALLOGRAFT_REJECTION	0.0564934
		BIOCARTA_TOLL_PATHWAY	0.0564934
		REACTOME_GPCR_LIGAND_BINDING	0.0564934
		PID_IL6_7_PATHWAY	0.0566673
		BIOCARTA_DC_PATHWAY	0.0582765
		REACTOME_ACTIVATION_OF_IRF3_IRF7_MEDIATED_BY_TBK1_IKK_EPSILON	0.0617945
		PID_EPO_PATHWAY	0.0620685
		REACTOME_NEURONAL_SYSTEM	0.0642071
		PID_ANGIOPOIETIN_RECEPTOR_PATHWAY	0.0666279
		PID_HIF1_TFPATHWAY	0.0680847
		REACTOME_RNA_POL_I_PROMOTER_OPENING	0.0680847
		REACTOME_DOWNSTREAM_SIGNALING_EVENTS_OF_B_CELL_RECEPTOR_BCR	0.0695098
		REACTOME_APOBEC3G_MEDIATED_RESISTANCE_TO_HIV1_INFECTION	0.0742194
		KEGG_GLYCOSAMINOGLYCAN_BIOSYNTHESIS_KERATAN_SULFATE	0.0747826
		KEGG_T_CELL_RECEPTOR_SIGNALING_PATHWAY	0.084796
		BIOCARTA_STRESS_PATHWAY	0.0866442
		KEGG_GLYCOLYSIS_GLUCONEOGENESIS	0.0908877
		REACTOME_EXTRINSIC_PATHWAY_FOR_APOPTOSIS	0.0908877
		REACTOME_TRAF3_DEPENDENT_IRF_ACTIVATION_PATHWAY	0.0908877
		KEGG_PATHWAYS_IN_CANCER	0.0938748
		KEGG_SYSTEMIC_LUPUS_ERYTHEMATOSUS	0.0977803
		KEGG_PANTOTHENATE_AND_COA_BIOSYNTHESIS	0.104977
		PID_TCPTP_PATHWAY	0.104977
		PID_IL5_PATHWAY	0.104977
		REACTOME_ACTIVATED_TAK1_MEDIATES_P38_MAPK_ACTIVATION	0.104977
		REACTOME_DEPOSITION_OF_NEW_CENPA_CONTAINING_NUCLEOSOMES_AT_THE_CENTROMERE	0.104977
		REACTOME_TRAF6_MEDIATED_IRF7_ACTIVATION	0.104977
		REACTOME_MYD88_MAL_CASCADE_INITIATED_ON_PLASMA_MEMBRANE	0.104977
		REACTOME_RNA_POL_I_TRANSCRIPTION	0.107781
		PID_CXCR4_PATHWAY	0.110514
		PID_CXCR3_PATHWAY	0.113129
		BIOCARTA_CDMAC_PATHWAY	0.122419
		PID_INTEGRIN3_PATHWAY	0.122419
		REACTOME_METABOLISM_OF_NUCLEOTIDES	0.122419
		BIOCARTA_NKT_PATHWAY	0.1277
		PID_TCR_CALCIUM_PATHWAY	0.1277
		REACTOME_ADAPTIVE_IMMUNE_SYSTEM	0.1277
		REACTOME_IL_3_5_AND_GM_CSF_SIGNALING	0.130743
		BIOCARTA_PML_PATHWAY	0.139065
		PID_SYNDECAN_4_PATHWAY	0.139065
		REACTOME_SEMA4D_IN_SEMAPHORIN_SIGNALING	0.139065
		REACTOME_PYRUVATE_METABOLISM	0.139065
		PID_AVB3_OPN_PATHWAY	0.155255
		KEGG_SMALL_CELL_LUNG_CANCER	0.156167
		PID_REG_GR_PATHWAY	0.156167
		BIOCARTA_IL7_PATHWAY	0.158759
		PID_INTEGRIN5_PATHWAY	0.158759
		BIOCARTA_KERATINOCYTE_PATHWAY	0.160205
		PID_CERAMIDE_PATHWAY	0.172211
		PID_P75_NTR_PATHWAY	0.172211
		KEGG_TRYPTOPHAN_METABOLISM	0.17969
		BIOCARTA_CARDIACEGF_PATHWAY	0.17969
		REACTOME_ANTIGEN_PROCESSING_CROSS_PRESENTATION	0.17969
		REACTOME_TRYPTOPHAN_CATABOLISM	0.17969
		KEGG_AMYOTROPHIC_LATERAL_SCLEROSIS_ALS	0.181145
		REACTOME_TRAF6_MEDIATED_INDUCTION_OF_NFKB_AND_MAP_KINASES_UPON_TLR7_8_OR_9_ACTIVATION	0.189542
		PID_FGF_PATHWAY	0.193905
		KEGG_PRIMARY_IMMUNODEFICIENCY	0.194234
		REACTOME_MRNA_PROCESSING	0.201266
		KEGG_PRION_DISEASES	0.210539
		KEGG_PANCREATIC_CANCER	0.210539
		PID_KIT_PATHWAY	0.216383
		REACTOME_PYRIMIDINE_CATABOLISM	0.216383
		REACTOME_ENDOSOMAL_VACUOLAR_PATHWAY	0.216383
		REACTOME_BILE_SALT_AND_ORGANIC_ANION_SLC_TRANSPORTERS	0.216383
		REACTOME_IKK_COMPLEX_RECRUITMENT_MEDIATED_BY_RIP1	0.216383
		REACTOME_ACTIVATION_OF_GENES_BY_ATF4	0.216566
		REACTOME_REGULATION_OF_IFNA_SIGNALING	0.216566
		REACTOME_MEIOTIC_SYNAPSIS	0.226672
		REACTOME_ER_PHAGOSOME_PATHWAY	0.242262
		BIOCARTA_IL12_PATHWAY	0.242268
		REACTOME_AMYLOIDS	0.256947
		ST_INTERFERON_GAMMA_PATHWAY	0.261206
		REACTOME_PROCESSING_OF_CAPPED_INTRON_CONTAINING_PRE_MRNA	0.264339
		BIOCARTA_PPARA_PATHWAY	0.268797
		PID_IL2_1PATHWAY	0.268797
		REACTOME_NEUROTRANSMITTER_RECEPTOR_BINDING_AND_DOWNSTREAM_TRANSMISSION_IN_THE_POSTSYNAPTIC_CELL	0.268797
		REACTOME_CELL_CYCLE_MITOTIC	0.27918
		PID_SHP2_PATHWAY	0.281243
		REACTOME_MEIOTIC_RECOMBINATION	0.281243
		KEGG_INTESTINAL_IMMUNE_NETWORK_FOR_IGA_PRODUCTION	0.287461
		BIOCARTA_GLEEVEC_PATHWAY	0.287461
		PID_AMB2_NEUTROPHILS_PATHWAY	0.287461
		REACTOME_PERK_REGULATED_GENE_EXPRESSION	0.287461
		KEGG_FOLATE_BIOSYNTHESIS	0.287978
		BIOCARTA_LYM_PATHWAY	0.287978
		BIOCARTA_IL5_PATHWAY	0.287978
		REACTOME_TRAFFICKING_AND_PROCESSING_OF_ENDOSOMAL_TLR	0.287978
		REACTOME_P75NTR_RECRUITS_SIGNALLING_COMPLEXES	0.287978
		REACTOME_NFKB_ACTIVATION_THROUGH_FADD_RIP1_PATHWAY_MEDIATED_BY_CASPASE_8_AND10	0.287978
		REACTOME_TRAF6_MEDIATED_INDUCTION_OF_TAK1_COMPLEX	0.287978
		REACTOME_TELOMERE_MAINTENANCE	0.287978
		ST_B_CELL_ANTIGEN_RECEPTOR	0.296868
		BIOCARTA_TPO_PATHWAY	0.30078
		REACTOME_SEMA4D_INDUCED_CELL_MIGRATION_AND_GROWTH_CONE_COLLAPSE	0.30078
		REACTOME_SIGNALING_BY_GPCR	0.304428
		REACTOME_IL_2_SIGNALING	0.314162
		REACTOME_TRANSMISSION_ACROSS_CHEMICAL_SYNAPSES	0.315909
		ST_FAS_SIGNALING_PATHWAY	0.324001
		PID_IL4_2PATHWAY	0.324001
		REACTOME_SEMAPHORIN_INTERACTIONS	0.324001
		ST_STAT3_PATHWAY	0.325792
		REACTOME_IL_7_SIGNALING	0.325792
		PID_BCR_5PATHWAY	0.338675
		ST_T_CELL_SIGNAL_TRANSDUCTION	0.343581
		PID_IL3_PATHWAY	0.343581
		REACTOME_SIGNALING_BY_FGFR1_MUTANTS	0.343581
		REACTOME_GLYCOLYSIS	0.343581
		REACTOME_DESTABILIZATION_OF_MRNA_BY_AUF1_HNRNP_D0	0.343581
		KEGG_CELL_CYCLE	0.350118
		KEGG_NATURAL_KILLER_CELL_MEDIATED_CYTOTOXICITY	0.359114
		KEGG_TYPE_II_DIABETES_MELLITUS	0.361268
		BIOCARTA_TCYTOTOXIC_PATHWAY	0.361268
		BIOCARTA_THELPER_PATHWAY	0.361268
		REACTOME_PURINE_SALVAGE	0.361268
		REACTOME_DEGRADATION_OF_THE_EXTRACELLULAR_MATRIX	0.363468
		REACTOME_IL_RECEPTOR_SHC_SIGNALING	0.363468
		REACTOME_TRANSPORT_OF_GLUCOSE_AND_OTHER_SUGARS_BILE_SALTS_AND_ORGANIC_ACIDS_METAL_IONS_AND_AMINE_COMPOUNDS	0.375337
		REACTOME_VIF_MEDIATED_DEGRADATION_OF_APOBEC3G	0.375608
		REACTOME_RNA_POL_I_RNA_POL_III_AND_MITOCHONDRIAL_TRANSCRIPTION	0.38565
		REACTOME_HEMOSTASIS	0.38565
		BIOCARTA_GH_PATHWAY	0.388488
		REACTOME_CLASS_I_MHC_MEDIATED_ANTIGEN_PROCESSING_PRESENTATION	0.394163
		REACTOME_P38MAPK_EVENTS	0.397528
		REACTOME_SEMA3A_PLEXIN_REPULSION_SIGNALING_BY_INHIBITING_INTEGRIN_ADHESION	0.397528
		REACTOME_JNK_C_JUN_KINASES_PHOSPHORYLATION_AND_ACTIVATION_MEDIATED_BY_ACTIVATED_HUMAN_TAK1	0.397528
		PID_P38_ALPHA_BETA_PATHWAY	0.411941
		REACTOME_IRON_UPTAKE_AND_TRANSPORT	0.411941
		KEGG_FRUCTOSE_AND_MANNOSE_METABOLISM	0.432273
		KEGG_OOCYTE_MEIOSIS	0.432273
		BIOCARTA_HSP27_PATHWAY	0.432273
		PID_HIF2PATHWAY	0.432273
		REACTOME_PROLACTIN_RECEPTOR_SIGNALING	0.432273
		REACTOME_RNA_POL_II_TRANSCRIPTION	0.432273
		REACTOME_MRNA_SPLICING	0.432273
		REACTOME_DNA_REPAIR	0.432273
		REACTOME_LATE_PHASE_OF_HIV_LIFE_CYCLE	0.432273
		REACTOME_ACTIVATION_OF_BH3_ONLY_PROTEINS	0.432273
		REACTOME_SIGNALING_BY_EGFR_IN_CANCER	0.438773
		PID_MYC_ACTIV_PATHWAY	0.438958
		REACTOME_REGULATION_OF_MRNA_STABILITY_BY_PROTEINS_THAT_BIND_AU_RICH_ELEMENTS	0.438958
		REACTOME_APOPTOSIS	0.443557
		PID_SYNDECAN_2_PATHWAY	0.453346
		PID_TAP63_PATHWAY	0.459232
		KEGG_ANTIGEN_PROCESSING_AND_PRESENTATION	0.4709
		BIOCARTA_IL3_PATHWAY	0.4709
		REACTOME_INFLAMMASOMES	0.4709
		REACTOME_SIGNALING_BY_SCF_KIT	0.490998
		REACTOME_IMMUNOREGULATORY_INTERACTIONS_BETWEEN_A_LYMPHOID_AND_A_NON_LYMPHOID_CELL	0.503008
		KEGG_DRUG_METABOLISM_OTHER_ENZYMES	0.505959
		SIG_CD40PATHWAYMAP	0.505959
		REACTOME_PYRUVATE_METABOLISM_AND_CITRIC_ACID_TCA_CYCLE	0.505959
		PID_NFKAPPAB_ATYPICAL_PATHWAY	0.506287
		REACTOME_REGULATION_OF_KIT_SIGNALING	0.506287
		REACTOME_SIGNALING_BY_FGFR1_FUSION_MUTANTS	0.506287
		REACTOME_SYNTHESIS_AND_INTERCONVERSION_OF_NUCLEOTIDE_DI_AND_TRIPHOSPHATES	0.506287
		BIOCARTA_FMLP_PATHWAY	0.531375
		KEGG_GLYCOSAMINOGLYCAN_BIOSYNTHESIS_CHONDROITIN_SULFATE	0.546711
		KEGG_NICOTINATE_AND_NICOTINAMIDE_METABOLISM	0.546711
		BIOCARTA_HCMV_PATHWAY	0.546711
		BIOCARTA_CCR5_PATHWAY	0.546711
		BIOCARTA_41BB_PATHWAY	0.546711
		PID_SYNDECAN_3_PATHWAY	0.546711
		KEGG_ACUTE_MYELOID_LEUKEMIA	0.582255
		ST_GA13_PATHWAY	0.584273
		PID_ERBB4_PATHWAY	0.584273
		REACTOME_TRANSLATION	0.588367
		KEGG_GAP_JUNCTION	0.588795
		BIOCARTA_STATHMIN_PATHWAY	0.588795
		PID_PDGFRB_PATHWAY	0.60331
		REACTOME_NUCLEAR_SIGNALING_BY_ERBB4	0.609556
		PID_HDAC_CLASSI_PATHWAY	0.618583
		PID_MYC_REPRESS_PATHWAY	0.618583
		REACTOME_GENERIC_TRANSCRIPTION_PATHWAY	0.618583
		BIOCARTA_ATM_PATHWAY	0.621007
		BIOCARTA_EPO_PATHWAY	0.621007
		BIOCARTA_TH1TH2_PATHWAY	0.621007
		REACTOME_GPCR_DOWNSTREAM_SIGNALING	0.621007
		REACTOME_PYRIMIDINE_METABOLISM	0.621007
		PID_TCR_PATHWAY	0.629046
		PID_CD8_TCR_DOWNSTREAM_PATHWAY	0.629046
		KEGG_PROTEASOME	0.652746
		PID_UPA_UPAR_PATHWAY	0.652746
		REACTOME_SIGNALING_BY_FGFR_MUTANTS	0.652746
		REACTOME_ANTIGEN_PRESENTATION_FOLDING_ASSEMBLY_AND_PEPTIDE_LOADING_OF_CLASS_I_MHC	0.661313
		KEGG_P53_SIGNALING_PATHWAY	0.671959
		PID_LYSOPHOSPHOLIPID_PATHWAY	0.671959
		REACTOME_SLC_MEDIATED_TRANSMEMBRANE_TRANSPORT	0.682992
		KEGG_BLADDER_CANCER	0.699476
		BIOCARTA_AKT_PATHWAY	0.699476
		BIOCARTA_BIOPEPTIDES_PATHWAY	0.699476
		PID_S1P_S1P1_PATHWAY	0.699476
		REACTOME_CROSS_PRESENTATION_OF_SOLUBLE_EXOGENOUS_ANTIGENS_ENDOSOMES	0.699476
		REACTOME_CDK_MEDIATED_PHOSPHORYLATION_AND_REMOVAL_OF_CDC6	0.699476
		REACTOME_AUTODEGRADATION_OF_THE_E3_UBIQUITIN_LIGASE_COP1	0.699476
		REACTOME_FACTORS_INVOLVED_IN_MEGAKARYOCYTE_DEVELOPMENT_AND_PLATELET_PRODUCTION	0.699565
		KEGG_VIRAL_MYOCARDITIS	0.722672
		BIOCARTA_IL2_PATHWAY	0.722672
		BIOCARTA_IL6_PATHWAY	0.722672
		PID_INTEGRIN_CS_PATHWAY	0.722672
		PID_A6B1_A6B4_INTEGRIN_PATHWAY	0.722672
		PID_LYMPH_ANGIOGENESIS_PATHWAY	0.722672
		REACTOME_P53_INDEPENDENT_G1_S_DNA_DAMAGE_CHECKPOINT	0.722672
		REACTOME_BASIGIN_INTERACTIONS	0.722672
		BIOCARTA_TCR_PATHWAY	0.747551
		REACTOME_RESPIRATORY_ELECTRON_TRANSPORT_ATP_SYNTHESIS_BY_CHEMIOSMOTIC_COUPLING_AND_HEAT_PRODUCTION_BY_UNCOUPLING_PROTEINS_	0.756434
		KEGG_AUTOIMMUNE_THYROID_DISEASE	0.756585
		BIOCARTA_CASPASE_PATHWAY	0.756585
		BIOCARTA_RAS_PATHWAY	0.756585
		PID_SYNDECAN_1_PATHWAY	0.756585
		REACTOME_KERATAN_SULFATE_BIOSYNTHESIS	0.756585
		REACTOME_REGULATION_OF_ORNITHINE_DECARBOXYLASE_ODC	0.756585
		REACTOME_MITOTIC_G2_G2_M_PHASES	0.756585
		REACTOME_MITOTIC_PROMETAPHASE	0.756585
		REACTOME_SCF_BETA_TRCP_MEDIATED_DEGRADATION_OF_EMI1	0.756585
		REACTOME_POTASSIUM_CHANNELS	0.756585
		KEGG_PROGESTERONE_MEDIATED_OOCYTE_MATURATION	0.75719
		REACTOME_BETA_DEFENSINS	0.76251
		REACTOME_PURINE_CATABOLISM	0.76251
		REACTOME_INTEGRATION_OF_PROVIRUS	0.76251
		KEGG_PENTOSE_PHOSPHATE_PATHWAY	0.767485
		KEGG_GALACTOSE_METABOLISM	0.767485
		KEGG_ARGININE_AND_PROLINE_METABOLISM	0.767485
		KEGG_ECM_RECEPTOR_INTERACTION	0.767485
		KEGG_TIGHT_JUNCTION	0.767485
		PID_FOXO_PATHWAY	0.767485
		PID_AJDISS_2PATHWAY	0.767485
		REACTOME_GENERATION_OF_SECOND_MESSENGER_MOLECULES	0.767485
		PID_DELTA_NP63_PATHWAY	0.792831
		REACTOME_MAP_KINASE_ACTIVATION_IN_TLR_CASCADE	0.792831
		KEGG_NEUROACTIVE_LIGAND_RECEPTOR_INTERACTION	0.799395
		REACTOME_MEIOSIS	0.799395
		KEGG_PORPHYRIN_AND_CHLOROPHYLL_METABOLISM	0.799921
		BIOCARTA_RACCYCD_PATHWAY	0.799921
		BIOCARTA_VIP_PATHWAY	0.799921
		REACTOME_P53_DEPENDENT_G1_DNA_DAMAGE_RESPONSE	0.810383
		REACTOME_AUTODEGRADATION_OF_CDH1_BY_CDH1_APC_C	0.810383
		KEGG_ASTHMA	0.81109
		BIOCARTA_GSK3_PATHWAY	0.81109
		BIOCARTA_MAPK_PATHWAY	0.81109
		ST_IL_13_PATHWAY	0.81109
		ST_INTERLEUKIN_4_PATHWAY	0.81109
		PID_TRAIL_PATHWAY	0.81109
		PID_CD8_TCR_PATHWAY	0.81109
		PID_VEGFR1_PATHWAY	0.81109
		REACTOME_ANTIGEN_ACTIVATES_B_CELL_RECEPTOR_LEADING_TO_GENERATION_OF_SECOND_MESSENGERS	0.81109
		REACTOME_STEROID_HORMONES	0.81109
		REACTOME_CDT1_ASSOCIATION_WITH_THE_CDC6_ORC_ORIGIN_COMPLEX	0.81109
		REACTOME_PURINE_METABOLISM	0.81109
		REACTOME_SCFSKP2_MEDIATED_DEGRADATION_OF_P27_P21	0.81109
		REACTOME_INTRINSIC_PATHWAY_FOR_APOPTOSIS	0.81109
		KEGG_FOCAL_ADHESION	0.824728
		REACTOME_GLYCOSAMINOGLYCAN_METABOLISM	0.826836
		PID_PTP1B_PATHWAY	0.837182
		ST_GAQ_PATHWAY	0.837868
		PID_INTEGRIN2_PATHWAY	0.837868
		REACTOME_SIGNALLING_TO_RAS	0.837868
		REACTOME_LATENT_INFECTION_OF_HOMO_SAPIENS_WITH_MYCOBACTERIUM_TUBERCULOSIS	0.837868
		REACTOME_KERATAN_SULFATE_KERATIN_METABOLISM	0.837868
		PID_CASPASE_PATHWAY	0.853559
		REACTOME_REGULATION_OF_APOPTOSIS	0.853559
		SA_FAS_SIGNALING	0.867897
		REACTOME_TRAF6_MEDIATED_IRF7_ACTIVATION_IN_TLR7_8_OR_9_SIGNALING	0.867897
		REACTOME_CHROMOSOME_MAINTENANCE	0.877211
		BIOCARTA_NFAT_PATHWAY	0.909304
		REACTOME_METABOLISM_OF_PROTEINS	0.909389
		REACTOME_ANTIGEN_PROCESSING_UBIQUITINATION_PROTEASOME_DEGRADATION	0.916143
		KEGG_SPLICEOSOME	0.922727
		KEGG_CARDIAC_MUSCLE_CONTRACTION	0.922727
		KEGG_VASCULAR_SMOOTH_MUSCLE_CONTRACTION	0.922727
		BIOCARTA_FAS_PATHWAY	0.922727
		BIOCARTA_TCAPOPTOSIS_PATHWAY	0.922727
		BIOCARTA_EIF2_PATHWAY	0.922727
		ST_JAK_STAT_PATHWAY	0.922727
		ST_TYPE_I_INTERFERON_PATHWAY	0.922727
		PID_IL2_STAT5_PATHWAY	0.922727
		REACTOME_MEMBRANE_TRAFFICKING	0.922727
		REACTOME_SRP_DEPENDENT_COTRANSLATIONAL_PROTEIN_TARGETING_TO_MEMBRANE	0.922727
		REACTOME_INTEGRATION_OF_ENERGY_METABOLISM	0.922727
		REACTOME_GLUCONEOGENESIS	0.922727
		REACTOME_RECRUITMENT_OF_MITOTIC_CENTROSOME_PROTEINS_AND_COMPLEXES	0.922727
		REACTOME_GPVI_MEDIATED_ACTIVATION_CASCADE	0.922727
		REACTOME_RNA_POL_II_PRE_TRANSCRIPTION_EVENTS	0.922727
		REACTOME_HIV_LIFE_CYCLE	0.922727
		REACTOME_NONSENSE_MEDIATED_DECAY_ENHANCED_BY_THE_EXON_JUNCTION_COMPLEX	0.922727
		KEGG_VALINE_LEUCINE_AND_ISOLEUCINE_BIOSYNTHESIS	0.923684
		KEGG_GLYCEROPHOSPHOLIPID_METABOLISM	0.923684
		KEGG_LIMONENE_AND_PINENE_DEGRADATION	0.923684
		KEGG_MAPK_SIGNALING_PATHWAY	0.923684
		KEGG_LONG_TERM_POTENTIATION	0.923684
		KEGG_LONG_TERM_DEPRESSION	0.923684
		KEGG_OLFACTORY_TRANSDUCTION	0.923684
		KEGG_GLIOMA	0.923684
		BIOCARTA_EGF_PATHWAY	0.923684
		BIOCARTA_MONOCYTE_PATHWAY	0.923684
		ST_ERK1_ERK2_MAPK_PATHWAY	0.923684
		SA_PROGRAMMED_CELL_DEATH	0.923684
		PID_INTEGRIN4_PATHWAY	0.923684
		PID_P38_GAMMA_DELTA_PATHWAY	0.923684
		REACTOME_METABOLISM_OF_STEROID_HORMONES_AND_VITAMINS_A_AND_D	0.923684
		REACTOME_ANDROGEN_BIOSYNTHESIS	0.923684
		REACTOME_HYALURONAN_UPTAKE_AND_DEGRADATION	0.923684
		REACTOME_SIGNALING_BY_ACTIVATED_POINT_MUTANTS_OF_FGFR1	0.923684
		REACTOME_SIGNALING_BY_FGFR3_MUTANTS	0.923684
		REACTOME_PLATELET_ADHESION_TO_EXPOSED_COLLAGEN	0.923684
		REACTOME_REGULATED_PROTEOLYSIS_OF_P75NTR	0.923684
		REACTOME_NCAM_SIGNALING_FOR_NEURITE_OUT_GROWTH	0.923684
		REACTOME_REGULATION_OF_INSULIN_SECRETION_BY_ACETYLCHOLINE	0.923684
		REACTOME_FACILITATIVE_NA_INDEPENDENT_GLUCOSE_TRANSPORTERS	0.923684
		REACTOME_ADVANCED_GLYCOSYLATION_ENDPRODUCT_RECEPTOR_SIGNALING	0.923684
		REACTOME_CYTOSOLIC_SULFONATION_OF_SMALL_MOLECULES	0.923684
		REACTOME_FGFR4_LIGAND_BINDING_AND_ACTIVATION	0.923684
		NABA_ECM_AFFILIATED	0.923684
		BIOCARTA_PDGF_PATHWAY	0.924376
		PID_IL8_CXCR2_PATHWAY	0.924376
		REACTOME_P75_NTR_RECEPTOR_MEDIATED_SIGNALLING	0.92467
		KEGG_ASCORBATE_AND_ALDARATE_METABOLISM	0.953403
		KEGG_GLYOXYLATE_AND_DICARBOXYLATE_METABOLISM	0.953403
		KEGG_FC_EPSILON_RI_SIGNALING_PATHWAY	0.953403
		KEGG_HYPERTROPHIC_CARDIOMYOPATHY_HCM	0.953403
		BIOCARTA_BLYMPHOCYTE_PATHWAY	0.953403
		BIOCARTA_SET_PATHWAY	0.953403
		BIOCARTA_TCRA_PATHWAY	0.953403
		PID_ARF6_PATHWAY	0.953403
		PID_IL2_PI3K_PATHWAY	0.953403
		PID_IL12_STAT4_PATHWAY	0.953403
		REACTOME_RECYCLING_OF_BILE_ACIDS_AND_SALTS	0.953403
		REACTOME_TETRAHYDROBIOPTERIN_BH4_SYNTHESIS_RECYCLING_SALVAGE_AND_REGULATION	0.953403
		REACTOME_DEFENSINS	0.953403
		REACTOME_REVERSIBLE_HYDRATION_OF_CARBON_DIOXIDE	0.953403
		REACTOME_REGULATION_OF_PYRUVATE_DEHYDROGENASE_PDH_COMPLEX	0.953403
		REACTOME_TRANSLOCATION_OF_ZAP_70_TO_IMMUNOLOGICAL_SYNAPSE	0.953403
		REACTOME_TRANSPORT_OF_INORGANIC_CATIONS_ANIONS_AND_AMINO_ACIDS_OLIGOPEPTIDES	0.953403
		REACTOME_TRANSPORT_OF_ORGANIC_ANIONS	0.953403
		REACTOME_EARLY_PHASE_OF_HIV_LIFE_CYCLE	0.953403
		REACTOME_THE_NLRP3_INFLAMMASOME	0.953403
		REACTOME_FGFR2C_LIGAND_BINDING_AND_ACTIVATION	0.953403
		KEGG_PYRIMIDINE_METABOLISM	0.961804
		REACTOME_RESPONSE_TO_ELEVATED_PLATELET_CYTOSOLIC_CA2_	0.961804
		REACTOME_EXTRACELLULAR_MATRIX_ORGANIZATION	0.973681
		PID_ERBB1_RECEPTOR_PROXIMAL_PATHWAY	0.981956
		KEGG_ALZHEIMERS_DISEASE	0.985645
		BIOCARTA_ASBCELL_PATHWAY	0.985645
		BIOCARTA_CBL_PATHWAY	0.985645
		BIOCARTA_FIBRINOLYSIS_PATHWAY	0.985645
		BIOCARTA_ARENRF2_PATHWAY	0.985645
		BIOCARTA_TALL1_PATHWAY	0.985645
		REACTOME_PHOSPHORYLATION_OF_CD3_AND_TCR_ZETA_CHAINS	0.985645
		REACTOME_ACTIVATION_OF_RAC	0.985645
		REACTOME_METAL_ION_SLC_TRANSPORTERS	0.985645
		REACTOME_FGFR1_LIGAND_BINDING_AND_ACTIVATION	0.985645
		KEGG_LYSINE_DEGRADATION	0.993851
		KEGG_GLYCOSPHINGOLIPID_BIOSYNTHESIS_GLOBO_SERIES	0.993851
		KEGG_GLYCOSPHINGOLIPID_BIOSYNTHESIS_GANGLIO_SERIES	0.993851
		KEGG_ONE_CARBON_POOL_BY_FOLATE	0.993851
		BIOCARTA_ACE2_PATHWAY	0.993851
		BIOCARTA_CTL_PATHWAY	0.993851
		BIOCARTA_D4GDI_PATHWAY	0.993851
		BIOCARTA_HIF_PATHWAY	0.993851
		BIOCARTA_DREAM_PATHWAY	0.993851
		PID_FAS_PATHWAY	0.993851
		PID_TCR_JNK_PATHWAY	0.993851
		PID_ERBB_NETWORK_PATHWAY	0.993851
		REACTOME_TERMINATION_OF_O_GLYCAN_BIOSYNTHESIS	0.993851
		REACTOME_CELL_SURFACE_INTERACTIONS_AT_THE_VASCULAR_WALL	0.993851
		REACTOME_SIGNALLING_TO_ERKS	0.993851
		REACTOME_ACYL_CHAIN_REMODELLING_OF_PI	0.993851
		REACTOME_HYALURONAN_METABOLISM	0.993851
		REACTOME_CHONDROITIN_SULFATE_DERMATAN_SULFATE_METABOLISM	0.993851
		REACTOME_XENOBIOTICS	0.993851
		REACTOME_NRIF_SIGNALS_CELL_DEATH_FROM_THE_NUCLEUS	0.993851
		REACTOME_CRMPS_IN_SEMA3A_SIGNALING	0.993851
		REACTOME_SEMA3A_PAK_DEPENDENT_AXON_REPULSION	0.993851
		REACTOME_DCC_MEDIATED_ATTRACTIVE_SIGNALING	0.993851
		REACTOME_SYNTHESIS_OF_SUBSTRATES_IN_N_GLYCAN_BIOSYTHESIS	0.993851
		REACTOME_DESTABILIZATION_OF_MRNA_BY_TRISTETRAPROLIN_TTP	0.993851
		KEGG_CITRATE_CYCLE_TCA_CYCLE	1
		KEGG_PENTOSE_AND_GLUCURONATE_INTERCONVERSIONS	1
		KEGG_FATTY_ACID_METABOLISM	1
		KEGG_STEROID_BIOSYNTHESIS	1
		KEGG_PRIMARY_BILE_ACID_BIOSYNTHESIS	1
		KEGG_STEROID_HORMONE_BIOSYNTHESIS	1
		KEGG_OXIDATIVE_PHOSPHORYLATION	1
		KEGG_PURINE_METABOLISM	1
		KEGG_ALANINE_ASPARTATE_AND_GLUTAMATE_METABOLISM	1
		KEGG_GLYCINE_SERINE_AND_THREONINE_METABOLISM	1
		KEGG_CYSTEINE_AND_METHIONINE_METABOLISM	1
		KEGG_VALINE_LEUCINE_AND_ISOLEUCINE_DEGRADATION	1
		KEGG_HISTIDINE_METABOLISM	1
		KEGG_TYROSINE_METABOLISM	1
		KEGG_PHENYLALANINE_METABOLISM	1
		KEGG_BETA_ALANINE_METABOLISM	1
		KEGG_TAURINE_AND_HYPOTAURINE_METABOLISM	1
		KEGG_SELENOAMINO_ACID_METABOLISM	1
		KEGG_GLUTATHIONE_METABOLISM	1
		KEGG_STARCH_AND_SUCROSE_METABOLISM	1
		KEGG_N_GLYCAN_BIOSYNTHESIS	1
		KEGG_OTHER_GLYCAN_DEGRADATION	1
		KEGG_O_GLYCAN_BIOSYNTHESIS	1
		KEGG_AMINO_SUGAR_AND_NUCLEOTIDE_SUGAR_METABOLISM	1
		KEGG_GLYCOSAMINOGLYCAN_DEGRADATION	1
		KEGG_GLYCOSAMINOGLYCAN_BIOSYNTHESIS_HEPARAN_SULFATE	1
		KEGG_GLYCEROLIPID_METABOLISM	1
		KEGG_INOSITOL_PHOSPHATE_METABOLISM	1
		KEGG_GLYCOSYLPHOSPHATIDYLINOSITOL_GPI_ANCHOR_BIOSYNTHESIS	1
		KEGG_ETHER_LIPID_METABOLISM	1
		KEGG_ARACHIDONIC_ACID_METABOLISM	1
		KEGG_LINOLEIC_ACID_METABOLISM	1
		KEGG_ALPHA_LINOLENIC_ACID_METABOLISM	1
		KEGG_SPHINGOLIPID_METABOLISM	1
		KEGG_GLYCOSPHINGOLIPID_BIOSYNTHESIS_LACTO_AND_NEOLACTO_SERIES	1
		KEGG_PYRUVATE_METABOLISM	1
		KEGG_PROPANOATE_METABOLISM	1
		KEGG_BUTANOATE_METABOLISM	1
		KEGG_RIBOFLAVIN_METABOLISM	1
		KEGG_RETINOL_METABOLISM	1
		KEGG_TERPENOID_BACKBONE_BIOSYNTHESIS	1
		KEGG_NITROGEN_METABOLISM	1
		KEGG_SULFUR_METABOLISM	1
		KEGG_AMINOACYL_TRNA_BIOSYNTHESIS	1
		KEGG_METABOLISM_OF_XENOBIOTICS_BY_CYTOCHROME_P450	1
		KEGG_DRUG_METABOLISM_CYTOCHROME_P450	1
		KEGG_BIOSYNTHESIS_OF_UNSATURATED_FATTY_ACIDS	1
		KEGG_ABC_TRANSPORTERS	1
		KEGG_RIBOSOME	1
		KEGG_RNA_DEGRADATION	1
		KEGG_RNA_POLYMERASE	1
		KEGG_BASAL_TRANSCRIPTION_FACTORS	1
		KEGG_DNA_REPLICATION	1
		KEGG_PROTEIN_EXPORT	1
		KEGG_PPAR_SIGNALING_PATHWAY	1
		KEGG_BASE_EXCISION_REPAIR	1
		KEGG_NUCLEOTIDE_EXCISION_REPAIR	1
		KEGG_MISMATCH_REPAIR	1
		KEGG_HOMOLOGOUS_RECOMBINATION	1
		KEGG_NON_HOMOLOGOUS_END_JOINING	1
		KEGG_ERBB_SIGNALING_PATHWAY	1
		KEGG_CALCIUM_SIGNALING_PATHWAY	1
		KEGG_PHOSPHATIDYLINOSITOL_SIGNALING_SYSTEM	1
		KEGG_UBIQUITIN_MEDIATED_PROTEOLYSIS	1
		KEGG_SNARE_INTERACTIONS_IN_VESICULAR_TRANSPORT	1
		KEGG_REGULATION_OF_AUTOPHAGY	1
		KEGG_LYSOSOME	1
		KEGG_ENDOCYTOSIS	1
		KEGG_PEROXISOME	1
		KEGG_MTOR_SIGNALING_PATHWAY	1
		KEGG_WNT_SIGNALING_PATHWAY	1
		KEGG_DORSO_VENTRAL_AXIS_FORMATION	1
		KEGG_NOTCH_SIGNALING_PATHWAY	1
		KEGG_HEDGEHOG_SIGNALING_PATHWAY	1
		KEGG_TGF_BETA_SIGNALING_PATHWAY	1
		KEGG_AXON_GUIDANCE	1
		KEGG_VEGF_SIGNALING_PATHWAY	1
		KEGG_CELL_ADHESION_MOLECULES_CAMS	1
		KEGG_ADHERENS_JUNCTION	1
		KEGG_COMPLEMENT_AND_COAGULATION_CASCADES	1
		KEGG_RENIN_ANGIOTENSIN_SYSTEM	1
		KEGG_FC_GAMMA_R_MEDIATED_PHAGOCYTOSIS	1
		KEGG_LEUKOCYTE_TRANSENDOTHELIAL_MIGRATION	1
		KEGG_CIRCADIAN_RHYTHM_MAMMAL	1
		KEGG_NEUROTROPHIN_SIGNALING_PATHWAY	1
		KEGG_TASTE_TRANSDUCTION	1
		KEGG_REGULATION_OF_ACTIN_CYTOSKELETON	1
		KEGG_INSULIN_SIGNALING_PATHWAY	1
		KEGG_GNRH_SIGNALING_PATHWAY	1
		KEGG_MELANOGENESIS	1
		KEGG_MATURITY_ONSET_DIABETES_OF_THE_YOUNG	1
		KEGG_ALDOSTERONE_REGULATED_SODIUM_REABSORPTION	1
		KEGG_VASOPRESSIN_REGULATED_WATER_REABSORPTION	1
		KEGG_PROXIMAL_TUBULE_BICARBONATE_RECLAMATION	1
		KEGG_PARKINSONS_DISEASE	1
		KEGG_HUNTINGTONS_DISEASE	1
		KEGG_VIBRIO_CHOLERAE_INFECTION	1
		KEGG_PATHOGENIC_ESCHERICHIA_COLI_INFECTION	1
		KEGG_COLORECTAL_CANCER	1
		KEGG_RENAL_CELL_CARCINOMA	1
		KEGG_ENDOMETRIAL_CANCER	1
		KEGG_PROSTATE_CANCER	1
		KEGG_THYROID_CANCER	1
		KEGG_BASAL_CELL_CARCINOMA	1
		KEGG_MELANOMA	1
		KEGG_CHRONIC_MYELOID_LEUKEMIA	1
		KEGG_NON_SMALL_CELL_LUNG_CANCER	1
		KEGG_ARRHYTHMOGENIC_RIGHT_VENTRICULAR_CARDIOMYOPATHY_ARVC	1
		KEGG_DILATED_CARDIOMYOPATHY	1
		BIOCARTA_NO1_PATHWAY	1
		BIOCARTA_CSK_PATHWAY	1
		BIOCARTA_SRCRPTP_PATHWAY	1
		BIOCARTA_AMI_PATHWAY	1
		BIOCARTA_ARAP_PATHWAY	1
		BIOCARTA_AGR_PATHWAY	1
		BIOCARTA_AKAP95_PATHWAY	1
		BIOCARTA_ALK_PATHWAY	1
		BIOCARTA_AT1R_PATHWAY	1
		BIOCARTA_DNAFRAGMENT_PATHWAY	1
		BIOCARTA_CHEMICAL_PATHWAY	1
		BIOCARTA_SPPA_PATHWAY	1
		BIOCARTA_AGPCR_PATHWAY	1
		BIOCARTA_BCELLSURVIVAL_PATHWAY	1
		BIOCARTA_BCR_PATHWAY	1
		BIOCARTA_NEUROTRANSMITTERS_PATHWAY	1
		BIOCARTA_CACAM_PATHWAY	1
		BIOCARTA_CARM_ER_PATHWAY	1
		BIOCARTA_CCR3_PATHWAY	1
		BIOCARTA_MCM_PATHWAY	1
		BIOCARTA_G1_PATHWAY	1
		BIOCARTA_G2_PATHWAY	1
		BIOCARTA_CELL2CELL_PATHWAY	1
		BIOCARTA_CERAMIDE_PATHWAY	1
		BIOCARTA_CLASSIC_PATHWAY	1
		BIOCARTA_COMP_PATHWAY	1
		BIOCARTA_VDR_PATHWAY	1
		BIOCARTA_HDAC_PATHWAY	1
		BIOCARTA_GCR_PATHWAY	1
		BIOCARTA_CTCF_PATHWAY	1
		BIOCARTA_CXCR4_PATHWAY	1
		BIOCARTA_CELLCYCLE_PATHWAY	1
		BIOCARTA_CFTR_PATHWAY	1
		BIOCARTA_P35ALZHEIMERS_PATHWAY	1
		BIOCARTA_MTA3_PATHWAY	1
		BIOCARTA_SKP2E2F_PATHWAY	1
		BIOCARTA_CALCINEURIN_PATHWAY	1
		BIOCARTA_ETC_PATHWAY	1
		BIOCARTA_NDKDYNAMIN_PATHWAY	1
		BIOCARTA_EPHA4_PATHWAY	1
		BIOCARTA_ECM_PATHWAY	1
		BIOCARTA_ERK_PATHWAY	1
		BIOCARTA_EIF_PATHWAY	1
		BIOCARTA_EXTRINSIC_PATHWAY	1
		BIOCARTA_FCER1_PATHWAY	1
		BIOCARTA_FEEDER_PATHWAY	1
		BIOCARTA_GABA_PATHWAY	1
		BIOCARTA_GATA3_PATHWAY	1
		BIOCARTA_GLYCOLYSIS_PATHWAY	1
		BIOCARTA_AHSP_PATHWAY	1
		BIOCARTA_SALMONELLA_PATHWAY	1
		BIOCARTA_MPR_PATHWAY	1
		BIOCARTA_P53HYPOXIA_PATHWAY	1
		BIOCARTA_IGF1_PATHWAY	1
		BIOCARTA_IL4_PATHWAY	1
		BIOCARTA_INSULIN_PATHWAY	1
		BIOCARTA_INTEGRIN_PATHWAY	1
		BIOCARTA_INTRINSIC_PATHWAY	1
		BIOCARTA_LECTIN_PATHWAY	1
		BIOCARTA_PYK2_PATHWAY	1
		BIOCARTA_EGFR_SMRTE_PATHWAY	1
		BIOCARTA_MCALPAIN_PATHWAY	1
		BIOCARTA_ETS_PATHWAY	1
		BIOCARTA_MTOR_PATHWAY	1
		BIOCARTA_IGF1R_PATHWAY	1
		BIOCARTA_PITX2_PATHWAY	1
		BIOCARTA_NGF_PATHWAY	1
		BIOCARTA_NOS1_PATHWAY	1
		BIOCARTA_RARRXR_PATHWAY	1
		BIOCARTA_NUCLEARRS_PATHWAY	1
		BIOCARTA_P38MAPK_PATHWAY	1
		BIOCARTA_P53_PATHWAY	1
		BIOCARTA_PTDINS_PATHWAY	1
		BIOCARTA_PLCE_PATHWAY	1
		BIOCARTA_EDG1_PATHWAY	1
		BIOCARTA_CDK5_PATHWAY	1
		BIOCARTA_MYOSIN_PATHWAY	1
		BIOCARTA_PLATELETAPP_PATHWAY	1
		BIOCARTA_PS1_PATHWAY	1
		BIOCARTA_PROTEASOME_PATHWAY	1
		BIOCARTA_AKAPCENTROSOME_PATHWAY	1
		BIOCARTA_PTEN_PATHWAY	1
		BIOCARTA_RAB_PATHWAY	1
		BIOCARTA_RAC1_PATHWAY	1
		BIOCARTA_NKCELLS_PATHWAY	1
		BIOCARTA_RB_PATHWAY	1
		BIOCARTA_CHREBP2_PATHWAY	1
		BIOCARTA_BAD_PATHWAY	1
		BIOCARTA_CK1_PATHWAY	1
		BIOCARTA_EIF4_PATHWAY	1
		BIOCARTA_P27_PATHWAY	1
		BIOCARTA_PGC1A_PATHWAY	1
		BIOCARTA_LEPTIN_PATHWAY	1
		BIOCARTA_RHO_PATHWAY	1
		BIOCARTA_AKAP13_PATHWAY	1
		BIOCARTA_ATRBRCA_PATHWAY	1
		BIOCARTA_HER2_PATHWAY	1
		BIOCARTA_ERK5_PATHWAY	1
		BIOCARTA_MAL_PATHWAY	1
		BIOCARTA_MEF2D_PATHWAY	1
		BIOCARTA_MITOCHONDRIA_PATHWAY	1
		BIOCARTA_ACH_PATHWAY	1
		BIOCARTA_PARKIN_PATHWAY	1
		BIOCARTA_CDC42RAC_PATHWAY	1
		BIOCARTA_RANMS_PATHWAY	1
		BIOCARTA_BARR_MAPK_PATHWAY	1
		BIOCARTA_TOB1_PATHWAY	1
		BIOCARTA_BARRESTIN_SRC_PATHWAY	1
		BIOCARTA_MET_PATHWAY	1
		BIOCARTA_GPCR_PATHWAY	1
		BIOCARTA_IGF1MTOR_PATHWAY	1
		BIOCARTA_SHH_PATHWAY	1
		BIOCARTA_PTC1_PATHWAY	1
		BIOCARTA_SPRY_PATHWAY	1
		BIOCARTA_BARRESTIN_PATHWAY	1
		BIOCARTA_TEL_PATHWAY	1
		BIOCARTA_TGFB_PATHWAY	1
		BIOCARTA_KREB_PATHWAY	1
		BIOCARTA_CTLA4_PATHWAY	1
		BIOCARTA_LONGEVITY_PATHWAY	1
		BIOCARTA_SARS_PATHWAY	1
		BIOCARTA_PAR1_PATHWAY	1
		BIOCARTA_TNFR1_PATHWAY	1
		BIOCARTA_CREB_PATHWAY	1
		BIOCARTA_CARM1_PATHWAY	1
		BIOCARTA_TFF_PATHWAY	1
		BIOCARTA_TRKA_PATHWAY	1
		BIOCARTA_ARF_PATHWAY	1
		BIOCARTA_UCALPAIN_PATHWAY	1
		BIOCARTA_VEGF_PATHWAY	1
		BIOCARTA_VITCB_PATHWAY	1
		BIOCARTA_WNT_PATHWAY	1
		BIOCARTA_ACTINY_PATHWAY	1
		ST_WNT_CA2_CYCLIC_GMP_PATHWAY	1
		ST_DIFFERENTIATION_PATHWAY_IN_PC12_CELLS	1
		SA_B_CELL_RECEPTOR_COMPLEXES	1
		SIG_PIP3_SIGNALING_IN_CARDIAC_MYOCTES	1
		SA_CASPASE_CASCADE	1
		ST_GA12_PATHWAY	1
		ST_G_ALPHA_S_PATHWAY	1
		ST_G_ALPHA_I_PATHWAY	1
		SIG_CHEMOTAXIS	1
		ST_P38_MAPK_PATHWAY	1
		SIG_IL4RECEPTOR_IN_B_LYPHOCYTES	1
		WNT_SIGNALING	1
		SIG_REGULATION_OF_THE_ACTIN_CYTOSKELETON_BY_RHO_GTPASES	1
		ST_GRANULE_CELL_SURVIVAL_PATHWAY	1
		ST_ADRENERGIC	1
		ST_INTEGRIN_SIGNALING_PATHWAY	1
		SA_G1_AND_S_PHASES	1
		SIG_INSULIN_RECEPTOR_PATHWAY_IN_CARDIAC_MYOCYTES	1
		ST_PAC1_RECEPTOR_PATHWAY	1
		SIG_PIP3_SIGNALING_IN_B_LYMPHOCYTES	1
		SIG_BCR_SIGNALING_PATHWAY	1
		SA_G2_AND_M_PHASES	1
		ST_WNT_BETA_CATENIN_PATHWAY	1
		ST_JNK_MAPK_PATHWAY	1
		ST_MYOCYTE_AD_PATHWAY	1
		SA_PTEN_PATHWAY	1
		SA_REG_CASCADE_OF_CYCLIN_EXPR	1
		SA_TRKA_RECEPTOR	1
		ST_PHOSPHOINOSITIDE_3_KINASE_PATHWAY	1
		PID_FANCONI_PATHWAY	1
		PID_SMAD2_3NUCLEAR_PATHWAY	1
		PID_FCER1_PATHWAY	1
		PID_ENDOTHELIN_PATHWAY	1
		PID_PRL_SIGNALING_EVENTS_PATHWAY	1
		PID_RHOA_PATHWAY	1
		PID_AURORA_B_PATHWAY	1
		PID_INSULIN_PATHWAY	1
		PID_NOTCH_PATHWAY	1
		PID_P73PATHWAY	1
		PID_P38_MKK3_6PATHWAY	1
		PID_WNT_NONCANONICAL_PATHWAY	1
		PID_HDAC_CLASSII_PATHWAY	1
		PID_BETA_CATENIN_DEG_PATHWAY	1
		PID_HDAC_CLASSIII_PATHWAY	1
		PID_GLYPICAN_1PATHWAY	1
		PID_E2F_PATHWAY	1
		PID_ER_NONGENOMIC_PATHWAY	1
		PID_DNA_PK_PATHWAY	1
		PID_ATR_PATHWAY	1
		PID_MET_PATHWAY	1
		PID_S1P_S1P3_PATHWAY	1
		PID_LPA4_PATHWAY	1
		PID_AR_PATHWAY	1
		PID_EPHB_FWD_PATHWAY	1
		PID_S1P_S1P4_PATHWAY	1
		PID_ARF6_TRAFFICKING_PATHWAY	1
		PID_RHOA_REG_PATHWAY	1
		PID_REELIN_PATHWAY	1
		PID_PS1_PATHWAY	1
		PID_ILK_PATHWAY	1
		PID_NECTIN_PATHWAY	1
		PID_WNT_SIGNALING_PATHWAY	1
		PID_CDC42_PATHWAY	1
		PID_RET_PATHWAY	1
		PID_CDC42_REG_PATHWAY	1
		PID_ATM_PATHWAY	1
		PID_LKB1_PATHWAY	1
		PID_WNT_CANONICAL_PATHWAY	1
		PID_CIRCADIAN_PATHWAY	1
		PID_TXA2PATHWAY	1
		PID_TELOMERASE_PATHWAY	1
		PID_HNF3B_PATHWAY	1
		PID_NETRIN_PATHWAY	1
		PID_NFAT_3PATHWAY	1
		PID_CONE_PATHWAY	1
		PID_ERB_GENOMIC_PATHWAY	1
		PID_ARF6_DOWNSTREAM_PATHWAY	1
		PID_MTOR_4PATHWAY	1
		PID_IGF1_PATHWAY	1
		PID_PLK1_PATHWAY	1
		PID_TCR_RAS_PATHWAY	1
		PID_THROMBIN_PAR4_PATHWAY	1
		PID_MYC_PATHWAY	1
		PID_RANBP2_PATHWAY	1
		PID_PI3KCI_PATHWAY	1
		PID_AR_TF_PATHWAY	1
		PID_S1P_META_PATHWAY	1
		PID_ECADHERIN_NASCENT_AJ_PATHWAY	1
		PID_AVB3_INTEGRIN_PATHWAY	1
		PID_RXR_VDR_PATHWAY	1
		PID_LIS1_PATHWAY	1
		PID_ERBB1_DOWNSTREAM_PATHWAY	1
		PID_ERBB2_ERBB3_PATHWAY	1
		PID_FOXM1_PATHWAY	1
		PID_EPHA_FWDPATHWAY	1
		PID_HIF1A_PATHWAY	1
		PID_BMP_PATHWAY	1
		PID_ECADHERIN_KERATINOCYTE_PATHWAY	1
		PID_ALK1_PATHWAY	1
		PID_TRKR_PATHWAY	1
		PID_NEPHRIN_NEPH1_PATHWAY	1
		PID_CMYB_PATHWAY	1
		PID_P38_MK2_PATHWAY	1
		PID_ERA_GENOMIC_PATHWAY	1
		PID_ALK2_PATHWAY	1
		PID_RHODOPSIN_PATHWAY	1
		PID_PDGFRA_PATHWAY	1
		PID_RETINOIC_ACID_PATHWAY	1
		PID_HEDGEHOG_2PATHWAY	1
		PID_AR_NONGENOMIC_PATHWAY	1
		PID_ERBB1_INTERNALIZATION_PATHWAY	1
		PID_HEDGEHOG_GLI_PATHWAY	1
		PID_BETA_CATENIN_NUC_PATHWAY	1
		PID_SMAD2_3PATHWAY	1
		PID_P38_ALPHA_BETA_DOWNSTREAM_PATHWAY	1
		PID_ECADHERIN_STABILIZATION_PATHWAY	1
		PID_VEGFR1_2_PATHWAY	1
		PID_THROMBIN_PAR1_PATHWAY	1
		PID_RAC1_REG_PATHWAY	1
		PID_AURORA_A_PATHWAY	1
		PID_ARF_3PATHWAY	1
		PID_INSULIN_GLUCOSE_PATHWAY	1
		PID_PI3KCI_AKT_PATHWAY	1
		PID_IL8_CXCR1_PATHWAY	1
		PID_EPHRINB_REV_PATHWAY	1
		PID_BARD1_PATHWAY	1
		PID_P53_REGULATION_PATHWAY	1
		PID_NCADHERIN_PATHWAY	1
		PID_S1P_S1P2_PATHWAY	1
		PID_RAS_PATHWAY	1
		PID_MAPK_TRK_PATHWAY	1
		PID_PI3K_PLC_TRK_PATHWAY	1
		PID_EPHA2_FWD_PATHWAY	1
		PID_ALPHA_SYNUCLEIN_PATHWAY	1
		PID_INTEGRIN_A4B1_PATHWAY	1
		PID_RAC1_PATHWAY	1
		PID_RB_1PATHWAY	1
		PID_FAK_PATHWAY	1
		PID_HNF3A_PATHWAY	1
		PID_TGFBR_PATHWAY	1
		PID_HES_HEY_PATHWAY	1
		REACTOME_GLYCOGEN_BREAKDOWN_GLYCOGENOLYSIS	1
		REACTOME_RNA_POL_III_TRANSCRIPTION_INITIATION_FROM_TYPE_2_PROMOTER	1
		REACTOME_INHIBITION_OF_THE_PROTEOLYTIC_ACTIVITY_OF_APC_C_REQUIRED_FOR_THE_ONSET_OF_ANAPHASE_BY_MITOTIC_SPINDLE_CHECKPOINT_COMPONENTS	1
		REACTOME_PTM_GAMMA_CARBOXYLATION_HYPUSINE_FORMATION_AND_ARYLSULFATASE_ACTIVATION	1
		REACTOME_APOPTOTIC_CLEAVAGE_OF_CELLULAR_PROTEINS	1
		REACTOME_RNA_POL_I_TRANSCRIPTION_TERMINATION	1
		REACTOME_FORMATION_OF_THE_TERNARY_COMPLEX_AND_SUBSEQUENTLY_THE_43S_COMPLEX	1
		REACTOME_ACTIVATION_OF_THE_PRE_REPLICATIVE_COMPLEX	1
		REACTOME_PROCESSING_OF_INTRONLESS_PRE_MRNAS	1
		REACTOME_GAP_JUNCTION_DEGRADATION	1
		REACTOME_BASE_EXCISION_REPAIR	1
		REACTOME_BILE_ACID_AND_BILE_SALT_METABOLISM	1
		REACTOME_SYNTHESIS_OF_BILE_ACIDS_AND_BILE_SALTS_VIA_7ALPHA_HYDROXYCHOLESTEROL	1
		REACTOME_SIGNALING_BY_RHO_GTPASES	1
		REACTOME_SIGNALING_BY_WNT	1
		REACTOME_METABOLISM_OF_NON_CODING_RNA	1
		REACTOME_SYNTHESIS_OF_BILE_ACIDS_AND_BILE_SALTS_VIA_24_HYDROXYCHOLESTEROL	1
		REACTOME_SYNTHESIS_OF_BILE_ACIDS_AND_BILE_SALTS	1
		REACTOME_SIGNALLING_BY_NGF	1
		REACTOME_CTNNB1_PHOSPHORYLATION_CASCADE	1
		REACTOME_INSULIN_RECEPTOR_RECYCLING	1
		REACTOME_COPI_MEDIATED_TRANSPORT	1
		REACTOME_NEF_MEDIATED_DOWNREGULATION_OF_MHC_CLASS_I_COMPLEX_CELL_SURFACE_EXPRESSION	1
		REACTOME_DEVELOPMENTAL_BIOLOGY	1
		REACTOME_SIGNALING_BY_NODAL	1
		REACTOME_DAG_AND_IP3_SIGNALING	1
		REACTOME_SPRY_REGULATION_OF_FGF_SIGNALING	1
		REACTOME_TCA_CYCLE_AND_RESPIRATORY_ELECTRON_TRANSPORT	1
		REACTOME_BMAL1_CLOCK_NPAS2_ACTIVATES_CIRCADIAN_EXPRESSION	1
		REACTOME_CELL_CELL_COMMUNICATION	1
		REACTOME_ABCA_TRANSPORTERS_IN_LIPID_HOMEOSTASIS	1
		REACTOME_NEGATIVE_REGULATION_OF_FGFR_SIGNALING	1
		REACTOME_G0_AND_EARLY_G1	1
		REACTOME_NEF_MEDIATES_DOWN_MODULATION_OF_CELL_SURFACE_RECEPTORS_BY_RECRUITING_THEM_TO_CLATHRIN_ADAPTERS	1
		REACTOME_ACTIVATED_AMPK_STIMULATES_FATTY_ACID_OXIDATION_IN_MUSCLE	1
		REACTOME_VITAMIN_B5_PANTOTHENATE_METABOLISM	1
		REACTOME_BOTULINUM_NEUROTOXICITY	1
		REACTOME_METABOLISM_OF_VITAMINS_AND_COFACTORS	1
		REACTOME_TRANS_GOLGI_NETWORK_VESICLE_BUDDING	1
		REACTOME_PROTEOLYTIC_CLEAVAGE_OF_SNARE_COMPLEX_PROTEINS	1
		REACTOME_RESOLUTION_OF_AP_SITES_VIA_THE_MULTIPLE_NUCLEOTIDE_PATCH_REPLACEMENT_PATHWAY	1
		REACTOME_GAMMA_CARBOXYLATION_TRANSPORT_AND_AMINO_TERMINAL_CLEAVAGE_OF_PROTEINS	1
		REACTOME_CELL_CYCLE	1
		REACTOME_SIGNALING_BY_ERBB4	1
		REACTOME_ORC1_REMOVAL_FROM_CHROMATIN	1
		REACTOME_O_LINKED_GLYCOSYLATION_OF_MUCINS	1
		REACTOME_SULFUR_AMINO_ACID_METABOLISM	1
		REACTOME_DOWNREGULATION_OF_ERBB2_ERBB3_SIGNALING	1
		REACTOME_SIGNALING_BY_ERBB2	1
		REACTOME_SPHINGOLIPID_DE_NOVO_BIOSYNTHESIS	1
		REACTOME_SIGNALING_BY_CONSTITUTIVELY_ACTIVE_EGFR	1
		REACTOME_GRB2_EVENTS_IN_ERBB2_SIGNALING	1
		REACTOME_MEMBRANE_BINDING_AND_TARGETTING_OF_GAG_PROTEINS	1
		REACTOME_PI3K_EVENTS_IN_ERBB4_SIGNALING	1
		REACTOME_SHC1_EVENTS_IN_ERBB4_SIGNALING	1
		REACTOME_PI3K_EVENTS_IN_ERBB2_SIGNALING	1
		REACTOME_GLYCOSPHINGOLIPID_METABOLISM	1
		REACTOME_PPARA_ACTIVATES_GENE_EXPRESSION	1
		REACTOME_ASSOCIATION_OF_LICENSING_FACTORS_WITH_THE_PRE_REPLICATIVE_COMPLEX	1
		REACTOME_PRE_NOTCH_TRANSCRIPTION_AND_TRANSLATION	1
		REACTOME_MITOCHONDRIAL_PROTEIN_IMPORT	1
		REACTOME_SIGNALING_BY_HIPPO	1
		REACTOME_ACTIVATED_NOTCH1_TRANSMITS_SIGNAL_TO_THE_NUCLEUS	1
		REACTOME_SIGNALING_BY_NOTCH4	1
		REACTOME_RORA_ACTIVATES_CIRCADIAN_EXPRESSION	1
		REACTOME_REGULATION_OF_COMPLEMENT_CASCADE	1
		REACTOME_YAP1_AND_WWTR1_TAZ_STIMULATED_GENE_EXPRESSION	1
		REACTOME_SIGNALING_BY_NOTCH2	1
		REACTOME_PRE_NOTCH_EXPRESSION_AND_PROCESSING	1
		REACTOME_NOTCH1_INTRACELLULAR_DOMAIN_REGULATES_TRANSCRIPTION	1
		REACTOME_CIRCADIAN_REPRESSION_OF_EXPRESSION_BY_REV_ERBA	1
		REACTOME_PRE_NOTCH_PROCESSING_IN_GOLGI	1
		REACTOME_SIGNALING_BY_NOTCH1	1
		REACTOME_SIGNALING_BY_NOTCH3	1
		REACTOME_TRIGLYCERIDE_BIOSYNTHESIS	1
		REACTOME_INSULIN_RECEPTOR_SIGNALLING_CASCADE	1
		REACTOME_ARMS_MEDIATED_ACTIVATION	1
		REACTOME_PROLONGED_ERK_ACTIVATION_EVENTS	1
		REACTOME_SIGNALING_BY_BMP	1
		REACTOME_NGF_SIGNALLING_VIA_TRKA_FROM_THE_PLASMA_MEMBRANE	1
		REACTOME_TGF_BETA_RECEPTOR_SIGNALING_IN_EMT_EPITHELIAL_TO_MESENCHYMAL_TRANSITION	1
		REACTOME_DOWNREGULATION_OF_TGF_BETA_RECEPTOR_SIGNALING	1
		REACTOME_COLLAGEN_FORMATION	1
		REACTOME_SMAD2_SMAD3_SMAD4_HETEROTRIMER_REGULATES_TRANSCRIPTION	1
		REACTOME_SIGNALING_BY_FGFR_IN_DISEASE	1
		REACTOME_HS_GAG_DEGRADATION	1
		REACTOME_SYNTHESIS_OF_PIPS_AT_THE_EARLY_ENDOSOME_MEMBRANE	1
		REACTOME_SIGNALLING_TO_P38_VIA_RIT_AND_RIN	1
		REACTOME_REGULATION_OF_HYPOXIA_INDUCIBLE_FACTOR_HIF_BY_OXYGEN	1
		REACTOME_ACYL_CHAIN_REMODELLING_OF_PC	1
		REACTOME_SYNTHESIS_OF_PIPS_AT_THE_GOLGI_MEMBRANE	1
		REACTOME_TGF_BETA_RECEPTOR_SIGNALING_ACTIVATES_SMADS	1
		REACTOME_ACTIVATED_POINT_MUTANTS_OF_FGFR2	1
		REACTOME_PHOSPHOLIPID_METABOLISM	1
		REACTOME_CS_DS_DEGRADATION	1
		REACTOME_SYNTHESIS_OF_PA	1
		REACTOME_OXYGEN_DEPENDENT_PROLINE_HYDROXYLATION_OF_HYPOXIA_INDUCIBLE_FACTOR_ALPHA	1
		REACTOME_SYNTHESIS_OF_PIPS_AT_THE_LATE_ENDOSOME_MEMBRANE	1
		REACTOME_SYNTHESIS_OF_PE	1
		REACTOME_GASTRIN_CREB_SIGNALLING_PATHWAY_VIA_PKC_AND_MAPK	1
		REACTOME_CHONDROITIN_SULFATE_BIOSYNTHESIS	1
		REACTOME_SYNTHESIS_OF_PIPS_AT_THE_PLASMA_MEMBRANE	1
		REACTOME_THE_ACTIVATION_OF_ARYLSULFATASES	1
		REACTOME_TRANSCRIPTIONAL_ACTIVITY_OF_SMAD2_SMAD3_SMAD4_HETEROTRIMER	1
		REACTOME_DOWNREGULATION_OF_SMAD2_3_SMAD4_TRANSCRIPTIONAL_ACTIVITY	1
		REACTOME_ALPHA_LINOLENIC_ACID_ALA_METABOLISM	1
		REACTOME_PI_METABOLISM	1
		REACTOME_ABACAVIR_TRANSPORT_AND_METABOLISM	1
		REACTOME_SYNTHESIS_OF_PC	1
		REACTOME_HS_GAG_BIOSYNTHESIS	1
		REACTOME_APOPTOSIS_INDUCED_DNA_FRAGMENTATION	1
		REACTOME_KERATAN_SULFATE_DEGRADATION	1
		REACTOME_HEPARAN_SULFATE_HEPARIN_HS_GAG_METABOLISM	1
		REACTOME_ACYL_CHAIN_REMODELLING_OF_PG	1
		REACTOME_ACYL_CHAIN_REMODELLING_OF_PE	1
		REACTOME_ACYL_CHAIN_REMODELLING_OF_PS	1
		REACTOME_MHC_CLASS_II_ANTIGEN_PRESENTATION	1
		REACTOME_GLYCEROPHOSPHOLIPID_BIOSYNTHESIS	1
		REACTOME_A_TETRASACCHARIDE_LINKER_SEQUENCE_IS_REQUIRED_FOR_GAG_SYNTHESIS	1
		REACTOME_ENOS_ACTIVATION_AND_REGULATION	1
		REACTOME_MICRORNA_MIRNA_BIOGENESIS	1
		REACTOME_NUCLEAR_EVENTS_KINASE_AND_TRANSCRIPTION_FACTOR_ACTIVATION	1
		REACTOME_RETROGRADE_NEUROTROPHIN_SIGNALLING	1
		REACTOME_ERKS_ARE_INACTIVATED	1
		REACTOME_NEGATIVE_REGULATION_OF_THE_PI3K_AKT_NETWORK	1
		REACTOME_PI3K_AKT_ACTIVATION	1
		REACTOME_REGULATORY_RNA_PATHWAYS	1
		REACTOME_EGFR_DOWNREGULATION	1
		REACTOME_PECAM1_INTERACTIONS	1
		REACTOME_AKT_PHOSPHORYLATES_TARGETS_IN_THE_CYTOSOL	1
		REACTOME_GAB1_SIGNALOSOME	1
		REACTOME_SHC1_EVENTS_IN_EGFR_SIGNALING	1
		REACTOME_ACTIVATION_OF_THE_MRNA_UPON_BINDING_OF_THE_CAP_BINDING_COMPLEX_AND_EIFS_AND_SUBSEQUENT_BINDING_TO_43S	1
		REACTOME_GLUTAMATE_NEUROTRANSMITTER_RELEASE_CYCLE	1
		REACTOME_ERK_MAPK_TARGETS	1
		REACTOME_TIE2_SIGNALING	1
		REACTOME_TRANSPORT_OF_MATURE_TRANSCRIPT_TO_CYTOPLASM	1
		REACTOME_METABOLISM_OF_AMINO_ACIDS_AND_DERIVATIVES	1
		REACTOME_FATTY_ACYL_COA_BIOSYNTHESIS	1
		REACTOME_E2F_ENABLED_INHIBITION_OF_PRE_REPLICATION_COMPLEX_FORMATION	1
		REACTOME_BIOLOGICAL_OXIDATIONS	1
		REACTOME_CASPASE_MEDIATED_CLEAVAGE_OF_CYTOSKELETAL_PROTEINS	1
		REACTOME_INTEGRIN_CELL_SURFACE_INTERACTIONS	1
		REACTOME_CYTOCHROME_P450_ARRANGED_BY_SUBSTRATE_TYPE	1
		REACTOME_BASE_FREE_SUGAR_PHOSPHATE_REMOVAL_VIA_THE_SINGLE_NUCLEOTIDE_REPLACEMENT_PATHWAY	1
		REACTOME_APOPTOTIC_CLEAVAGE_OF_CELL_ADHESION_PROTEINS	1
		REACTOME_HDL_MEDIATED_LIPID_TRANSPORT	1
		REACTOME_NRAGE_SIGNALS_DEATH_THROUGH_JNK	1
		REACTOME_SLBP_DEPENDENT_PROCESSING_OF_REPLICATION_DEPENDENT_HISTONE_PRE_MRNAS	1
		REACTOME_REGULATION_OF_BETA_CELL_DEVELOPMENT	1
		REACTOME_PHASE1_FUNCTIONALIZATION_OF_COMPOUNDS	1
		REACTOME_RNA_POL_III_TRANSCRIPTION	1
		REACTOME_CELL_DEATH_SIGNALLING_VIA_NRAGE_NRIF_AND_NADE	1
		REACTOME_NEUROTRANSMITTER_RELEASE_CYCLE	1
		REACTOME_AMINO_ACID_TRANSPORT_ACROSS_THE_PLASMA_MEMBRANE	1
		REACTOME_ENDOGENOUS_STEROLS	1
		REACTOME_REGULATION_OF_GENE_EXPRESSION_IN_BETA_CELLS	1
		REACTOME_PROCESSIVE_SYNTHESIS_ON_THE_LAGGING_STRAND	1
		REACTOME_PEPTIDE_CHAIN_ELONGATION	1
		REACTOME_COMMON_PATHWAY	1
		REACTOME_MRNA_CAPPING	1
		REACTOME_MITOCHONDRIAL_FATTY_ACID_BETA_OXIDATION	1
		REACTOME_METABOLISM_OF_POLYAMINES	1
		REACTOME_NOTCH_HLH_TRANSCRIPTION_PATHWAY	1
		REACTOME_DOPAMINE_NEUROTRANSMITTER_RELEASE_CYCLE	1
		REACTOME_OPIOID_SIGNALLING	1
		REACTOME_MITOCHONDRIAL_TRNA_AMINOACYLATION	1
		REACTOME_CYTOSOLIC_TRNA_AMINOACYLATION	1
		REACTOME_CA_DEPENDENT_EVENTS	1
		REACTOME_ACETYLCHOLINE_NEUROTRANSMITTER_RELEASE_CYCLE	1
		REACTOME_ADENYLATE_CYCLASE_ACTIVATING_PATHWAY	1
		REACTOME_ADENYLATE_CYCLASE_INHIBITORY_PATHWAY	1
		REACTOME_DARPP_32_EVENTS	1
		REACTOME_LOSS_OF_NLP_FROM_MITOTIC_CENTROSOMES	1
		REACTOME_CELL_CYCLE_CHECKPOINTS	1
		REACTOME_DIABETES_PATHWAYS	1
		REACTOME_P130CAS_LINKAGE_TO_MAPK_SIGNALING_FOR_INTEGRINS	1
		REACTOME_GLYCOPROTEIN_HORMONES	1
		REACTOME_NOREPINEPHRINE_NEUROTRANSMITTER_RELEASE_CYCLE	1
		REACTOME_PLC_BETA_MEDIATED_EVENTS	1
		REACTOME_REGULATION_OF_INSULIN_LIKE_GROWTH_FACTOR_IGF_ACTIVITY_BY_INSULIN_LIKE_GROWTH_FACTOR_BINDING_PROTEINS_IGFBPS	1
		REACTOME_GRB2_SOS_PROVIDES_LINKAGE_TO_MAPK_SIGNALING_FOR_INTERGRINS_	1
		REACTOME_PEPTIDE_HORMONE_BIOSYNTHESIS	1
		REACTOME_G_PROTEIN_ACTIVATION	1
		REACTOME_ACETYLCHOLINE_BINDING_AND_DOWNSTREAM_EVENTS	1
		REACTOME_ABC_FAMILY_PROTEINS_MEDIATED_TRANSPORT	1
		REACTOME_TRNA_AMINOACYLATION	1
		REACTOME_OLFACTORY_SIGNALING_PATHWAY	1
		REACTOME_PKA_MEDIATED_PHOSPHORYLATION_OF_CREB	1
		REACTOME_RECRUITMENT_OF_NUMA_TO_MITOTIC_CENTROSOMES	1
		REACTOME_AMINE_DERIVED_HORMONES	1
		REACTOME_TRANSMEMBRANE_TRANSPORT_OF_SMALL_MOLECULES	1
		REACTOME_INTEGRIN_ALPHAIIB_BETA3_SIGNALING	1
		REACTOME_NUCLEAR_RECEPTOR_TRANSCRIPTION_PATHWAY	1
		REACTOME_INSULIN_SYNTHESIS_AND_PROCESSING	1
		REACTOME_CYCLIN_E_ASSOCIATED_EVENTS_DURING_G1_S_TRANSITION_	1
		REACTOME_HOMOLOGOUS_RECOMBINATION_REPAIR_OF_REPLICATION_INDEPENDENT_DOUBLE_STRAND_BREAKS	1
		REACTOME_G1_PHASE	1
		REACTOME_ELEVATION_OF_CYTOSOLIC_CA2_LEVELS	1
		REACTOME_TRANSCRIPTION_COUPLED_NER_TC_NER	1
		REACTOME_RNA_POL_II_TRANSCRIPTION_PRE_INITIATION_AND_PROMOTER_OPENING	1
		REACTOME_GLUCAGON_SIGNALING_IN_METABOLIC_REGULATION	1
		REACTOME_SIGNALING_BY_PDGF	1
		REACTOME_ASSOCIATION_OF_TRIC_CCT_WITH_TARGET_PROTEINS_DURING_BIOSYNTHESIS	1
		REACTOME_PREFOLDIN_MEDIATED_TRANSFER_OF_SUBSTRATE_TO_CCT_TRIC	1
		REACTOME_HORMONE_LIGAND_BINDING_RECEPTORS	1
		REACTOME_PROTEIN_FOLDING	1
		REACTOME_FORMATION_OF_TUBULIN_FOLDING_INTERMEDIATES_BY_CCT_TRIC	1
		REACTOME_PEROXISOMAL_LIPID_METABOLISM	1
		REACTOME_POST_CHAPERONIN_TUBULIN_FOLDING_PATHWAY	1
		REACTOME_STRIATED_MUSCLE_CONTRACTION	1
		REACTOME_AMINE_LIGAND_BINDING_RECEPTORS	1
		REACTOME_DOWNSTREAM_SIGNAL_TRANSDUCTION	1
		REACTOME_MUSCLE_CONTRACTION	1
		REACTOME_SEROTONIN_RECEPTORS	1
		REACTOME_CDC6_ASSOCIATION_WITH_THE_ORC_ORIGIN_COMPLEX	1
		REACTOME_M_G1_TRANSITION	1
		REACTOME_MRNA_SPLICING_MINOR_PATHWAY	1
		REACTOME_3_UTR_MEDIATED_TRANSLATIONAL_REGULATION	1
		REACTOME_PROCESSING_OF_CAPPED_INTRONLESS_PRE_MRNA	1
		REACTOME_PURINE_RIBONUCLEOSIDE_MONOPHOSPHATE_BIOSYNTHESIS	1
		REACTOME_G1_S_TRANSITION	1
		REACTOME_CITRIC_ACID_CYCLE_TCA_CYCLE	1
		REACTOME_TRANSCRIPTION	1
		REACTOME_POL_SWITCHING	1
		REACTOME_NUCLEOTIDE_EXCISION_REPAIR	1
		REACTOME_REGULATION_OF_THE_FANCONI_ANEMIA_PATHWAY	1
		REACTOME_AXON_GUIDANCE	1
		REACTOME_ACTIVATION_OF_CHAPERONE_GENES_BY_XBP1S	1
		REACTOME_REGULATION_OF_INSULIN_SECRETION_BY_GLUCAGON_LIKE_PEPTIDE1	1
		REACTOME_G_ALPHA_Q_SIGNALLING_EVENTS	1
		REACTOME_P2Y_RECEPTORS	1
		REACTOME_TRAFFICKING_OF_AMPA_RECEPTORS	1
		REACTOME_NCAM1_INTERACTIONS	1
		REACTOME_CLASS_C_3_METABOTROPIC_GLUTAMATE_PHEROMONE_RECEPTORS	1
		REACTOME_REGULATION_OF_INSULIN_SECRETION	1
		REACTOME_INHIBITION_OF_INSULIN_SECRETION_BY_ADRENALINE_NORADRENALINE	1
		REACTOME_NUCLEOTIDE_LIKE_PURINERGIC_RECEPTORS	1
		REACTOME_ACTIVATION_OF_CHAPERONES_BY_ATF6_ALPHA	1
		REACTOME_TRANSPORT_OF_MATURE_MRNA_DERIVED_FROM_AN_INTRONLESS_TRANSCRIPT	1
		REACTOME_EICOSANOID_LIGAND_BINDING_RECEPTORS	1
		REACTOME_UNFOLDED_PROTEIN_RESPONSE	1
		REACTOME_CLASS_B_2_SECRETIN_FAMILY_RECEPTORS	1
		REACTOME_GLUCAGON_TYPE_LIGAND_RECEPTORS	1
		REACTOME_G_ALPHA1213_SIGNALLING_EVENTS	1
		REACTOME_FANCONI_ANEMIA_PATHWAY	1
		REACTOME_TRAFFICKING_OF_GLUR2_CONTAINING_AMPA_RECEPTORS	1
		REACTOME_ACTIVATION_OF_CHAPERONE_GENES_BY_ATF6_ALPHA	1
		REACTOME_PROSTANOID_LIGAND_RECEPTORS	1
		REACTOME_OPSINS	1
		REACTOME_FORMATION_OF_RNA_POL_II_ELONGATION_COMPLEX_	1
		REACTOME_MRNA_3_END_PROCESSING	1
		REACTOME_POST_TRANSLATIONAL_MODIFICATION_SYNTHESIS_OF_GPI_ANCHORED_PROTEINS	1
		REACTOME_CYCLIN_A_B1_ASSOCIATED_EVENTS_DURING_G2_M_TRANSITION	1
		REACTOME_ELONGATION_ARREST_AND_RECOVERY	1
		REACTOME_ADP_SIGNALLING_THROUGH_P2RY1	1
		REACTOME_G_BETA_GAMMA_SIGNALLING_THROUGH_PLC_BETA	1
		REACTOME_CD28_CO_STIMULATION	1
		REACTOME_SYNTHESIS_SECRETION_AND_DEACYLATION_OF_GHRELIN	1
		REACTOME_ADHERENS_JUNCTIONS_INTERACTIONS	1
		REACTOME_OTHER_SEMAPHORIN_INTERACTIONS	1
		REACTOME_CD28_DEPENDENT_VAV1_PATHWAY	1
		REACTOME_LYSOSOME_VESICLE_BIOGENESIS	1
		REACTOME_G_BETA_GAMMA_SIGNALLING_THROUGH_PI3KGAMMA	1
		REACTOME_SPHINGOLIPID_METABOLISM	1
		REACTOME_PD1_SIGNALING	1
		REACTOME_G_ALPHA_S_SIGNALLING_EVENTS	1
		REACTOME_CELL_CELL_JUNCTION_ORGANIZATION	1
		REACTOME_G_ALPHA_Z_SIGNALLING_EVENTS	1
		REACTOME_COSTIMULATION_BY_THE_CD28_FAMILY	1
		REACTOME_SIGNALING_BY_ROBO_RECEPTOR	1
		REACTOME_CD28_DEPENDENT_PI3K_AKT_SIGNALING	1
		REACTOME_TIGHT_JUNCTION_INTERACTIONS	1
		REACTOME_G_PROTEIN_BETA_GAMMA_SIGNALLING	1
		REACTOME_GOLGI_ASSOCIATED_VESICLE_BIOGENESIS	1
		REACTOME_CTLA4_INHIBITORY_SIGNALING	1
		REACTOME_FORMATION_OF_TRANSCRIPTION_COUPLED_NER_TC_NER_REPAIR_COMPLEX	1
		REACTOME_AMINO_ACID_AND_OLIGOPEPTIDE_SLC_TRANSPORTERS	1
		REACTOME_BRANCHED_CHAIN_AMINO_ACID_CATABOLISM	1
		REACTOME_REPAIR_SYNTHESIS_FOR_GAP_FILLING_BY_DNA_POL_IN_TC_NER	1
		REACTOME_RECEPTOR_LIGAND_BINDING_INITIATES_THE_SECOND_PROTEOLYTIC_CLEAVAGE_OF_NOTCH_RECEPTOR	1
		REACTOME_SYNTHESIS_OF_DNA	1
		REACTOME_NA_CL_DEPENDENT_NEUROTRANSMITTER_TRANSPORTERS	1
		REACTOME_FORMATION_OF_FIBRIN_CLOT_CLOTTING_CASCADE	1
		REACTOME_DEADENYLATION_OF_MRNA	1
		REACTOME_MRNA_DECAY_BY_5_TO_3_EXORIBONUCLEASE	1
		REACTOME_SIGNAL_AMPLIFICATION	1
		REACTOME_ZINC_TRANSPORTERS	1
		REACTOME_DOUBLE_STRAND_BREAK_REPAIR	1
		REACTOME_RAS_ACTIVATION_UOPN_CA2_INFUX_THROUGH_NMDA_RECEPTOR	1
		REACTOME_SMOOTH_MUSCLE_CONTRACTION	1
		REACTOME_ACTIVATION_OF_NMDA_RECEPTOR_UPON_GLUTAMATE_BINDING_AND_POSTSYNAPTIC_EVENTS	1
		REACTOME_CREB_PHOSPHORYLATION_THROUGH_THE_ACTIVATION_OF_RAS	1
		REACTOME_POST_NMDA_RECEPTOR_ACTIVATION_EVENTS	1
		REACTOME_UNBLOCKING_OF_NMDA_RECEPTOR_GLUTAMATE_BINDING_AND_ACTIVATION	1
		REACTOME_METABOLISM_OF_MRNA	1
		REACTOME_MRNA_DECAY_BY_3_TO_5_EXORIBONUCLEASE	1
		REACTOME_DEADENYLATION_DEPENDENT_MRNA_DECAY	1
		REACTOME_CREB_PHOSPHORYLATION_THROUGH_THE_ACTIVATION_OF_CAMKII	1
		REACTOME_THROMBOXANE_SIGNALLING_THROUGH_TP_RECEPTOR	1
		REACTOME_CELL_EXTRACELLULAR_MATRIX_INTERACTIONS	1
		REACTOME_ADP_SIGNALLING_THROUGH_P2RY12	1
		REACTOME_CELL_JUNCTION_ORGANIZATION	1
		REACTOME_AMINE_COMPOUND_SLC_TRANSPORTERS	1
		REACTOME_GLUCOSE_TRANSPORT	1
		REACTOME_FRS2_MEDIATED_CASCADE	1
		REACTOME_METABOLISM_OF_RNA	1
		REACTOME_MITOTIC_G1_G1_S_PHASES	1
		REACTOME_PI_3K_CASCADE	1
		REACTOME_DOWNSTREAM_SIGNALING_OF_ACTIVATED_FGFR	1
		REACTOME_REGULATION_OF_MITOTIC_CELL_CYCLE	1
		REACTOME_REGULATION_OF_AMPK_ACTIVITY_VIA_LKB1	1
		REACTOME_MITOTIC_M_M_G1_PHASES	1
		REACTOME_MYOGENESIS	1
		REACTOME_PHOSPHOLIPASE_C_MEDIATED_CASCADE	1
		REACTOME_ACTIVATION_OF_KAINATE_RECEPTORS_UPON_GLUTAMATE_BINDING	1
		REACTOME_IONOTROPIC_ACTIVITY_OF_KAINATE_RECEPTORS	1
		REACTOME_ACTIVATION_OF_THE_AP1_FAMILY_OF_TRANSCRIPTION_FACTORS	1
		REACTOME_MAPK_TARGETS_NUCLEAR_EVENTS_MEDIATED_BY_MAP_KINASES	1
		REACTOME_SHC_MEDIATED_CASCADE	1
		REACTOME_THROMBIN_SIGNALLING_THROUGH_PROTEINASE_ACTIVATED_RECEPTORS_PARS	1
		REACTOME_ENERGY_DEPENDENT_REGULATION_OF_MTOR_BY_LKB1_AMPK	1
		REACTOME_REGULATION_OF_RHEB_GTPASE_ACTIVITY_BY_AMPK	1
		REACTOME_EFFECTS_OF_PIP2_HYDROLYSIS	1
		REACTOME_ROLE_OF_DCC_IN_REGULATING_APOPTOSIS	1
		REACTOME_POST_TRANSLATIONAL_PROTEIN_MODIFICATION	1
		REACTOME_L1CAM_INTERACTIONS	1
		REACTOME_ROLE_OF_SECOND_MESSENGERS_IN_NETRIN1_SIGNALING	1
		REACTOME_NETRIN1_SIGNALING	1
		REACTOME_METABOLISM_OF_LIPIDS_AND_LIPOPROTEINS	1
		REACTOME_INTERACTION_BETWEEN_L1_AND_ANKYRINS	1
		REACTOME_SIGNAL_TRANSDUCTION_BY_L1	1
		REACTOME_FATTY_ACID_TRIACYLGLYCEROL_AND_KETONE_BODY_METABOLISM	1
		REACTOME_TRANSPORT_OF_VITAMINS_NUCLEOSIDES_AND_RELATED_MOLECULES	1
		REACTOME_HIGHLY_CALCIUM_PERMEABLE_POSTSYNAPTIC_NICOTINIC_ACETYLCHOLINE_RECEPTORS	1
		REACTOME_PRESYNAPTIC_NICOTINIC_ACETYLCHOLINE_RECEPTORS	1
		REACTOME_ORGANIC_CATION_ANION_ZWITTERION_TRANSPORT	1
		REACTOME_RECYCLING_PATHWAY_OF_L1	1
		REACTOME_RESPIRATORY_ELECTRON_TRANSPORT	1
		REACTOME_ASPARAGINE_N_LINKED_GLYCOSYLATION	1
		REACTOME_ASSEMBLY_OF_THE_PRE_REPLICATIVE_COMPLEX	1
		REACTOME_BIOSYNTHESIS_OF_THE_N_GLYCAN_PRECURSOR_DOLICHOL_LIPID_LINKED_OLIGOSACCHARIDE_LLO_AND_TRANSFER_TO_A_NASCENT_PROTEIN	1
		REACTOME_GLOBAL_GENOMIC_NER_GG_NER	1
		REACTOME_CGMP_EFFECTS	1
		REACTOME_REGULATION_OF_SIGNALING_BY_CBL	1
		REACTOME_AMINO_ACID_SYNTHESIS_AND_INTERCONVERSION_TRANSAMINATION	1
		REACTOME_CALNEXIN_CALRETICULIN_CYCLE	1
		REACTOME_SYNTHESIS_SECRETION_AND_INACTIVATION_OF_GIP	1
		REACTOME_PASSIVE_TRANSPORT_BY_AQUAPORINS	1
		REACTOME_NEPHRIN_INTERACTIONS	1
		REACTOME_NITRIC_OXIDE_STIMULATES_GUANYLATE_CYCLASE	1
		REACTOME_PLATELET_HOMEOSTASIS	1
		REACTOME_N_GLYCAN_TRIMMING_IN_THE_ER_AND_CALNEXIN_CALRETICULIN_CYCLE	1
		REACTOME_PLATELET_SENSITIZATION_BY_LDL	1
		REACTOME_AQUAPORIN_MEDIATED_TRANSPORT	1
		REACTOME_RAP1_SIGNALLING	1
		REACTOME_PLATELET_CALCIUM_HOMEOSTASIS	1
		REACTOME_SIGNAL_REGULATORY_PROTEIN_SIRP_FAMILY_INTERACTIONS	1
		REACTOME_PROSTACYCLIN_SIGNALLING_THROUGH_PROSTACYCLIN_RECEPTOR	1
		REACTOME_GABA_SYNTHESIS_RELEASE_REUPTAKE_AND_DEGRADATION	1
		REACTOME_INCRETIN_SYNTHESIS_SECRETION_AND_INACTIVATION	1
		REACTOME_SYNTHESIS_SECRETION_AND_INACTIVATION_OF_GLP1	1
		REACTOME_REGULATION_OF_WATER_BALANCE_BY_RENAL_AQUAPORINS	1
		REACTOME_DESTABILIZATION_OF_MRNA_BY_BRF1	1
		REACTOME_IRAK1_RECRUITS_IKK_COMPLEX	1
		REACTOME_CIRCADIAN_CLOCK	1
		REACTOME_GABA_A_RECEPTOR_ACTIVATION	1
		REACTOME_INHIBITION_OF_VOLTAGE_GATED_CA2_CHANNELS_VIA_GBETA_GAMMA_SUBUNITS	1
		REACTOME_IRAK2_MEDIATED_ACTIVATION_OF_TAK1_COMPLEX_UPON_TLR7_8_OR_9_STIMULATION	1
		REACTOME_GABA_B_RECEPTOR_ACTIVATION	1
		REACTOME_DESTABILIZATION_OF_MRNA_BY_KSRP	1
		REACTOME_TRANSPORT_TO_THE_GOLGI_AND_SUBSEQUENT_MODIFICATION	1
		REACTOME_N_GLYCAN_ANTENNAE_ELONGATION	1
		REACTOME_ION_TRANSPORT_BY_P_TYPE_ATPASES	1
		REACTOME_GABA_RECEPTOR_ACTIVATION	1
		REACTOME_KINESINS	1
		REACTOME_N_GLYCAN_ANTENNAE_ELONGATION_IN_THE_MEDIAL_TRANS_GOLGI	1
		REACTOME_TRANSFERRIN_ENDOCYTOSIS_AND_RECYCLING	1
		REACTOME_DSCAM_INTERACTIONS	1
		REACTOME_ION_CHANNEL_TRANSPORT	1
		REACTOME_LIGAND_GATED_ION_CHANNEL_TRANSPORT	1
		REACTOME_FORMATION_OF_INCISION_COMPLEX_IN_GG_NER	1
		REACTOME_TRANSCRIPTIONAL_REGULATION_OF_WHITE_ADIPOCYTE_DIFFERENTIATION	1
		REACTOME_ENDOSOMAL_SORTING_COMPLEX_REQUIRED_FOR_TRANSPORT_ESCRT	1
		REACTOME_PLATELET_AGGREGATION_PLUG_FORMATION	1
		REACTOME_SIGNALING_BY_NOTCH	1
		REACTOME_LAGGING_STRAND_SYNTHESIS	1
		REACTOME_INTRINSIC_PATHWAY	1
		REACTOME_INHIBITION_OF_REPLICATION_INITIATION_OF_DAMAGED_DNA_BY_RB1_E2F1	1
		REACTOME_ETHANOL_OXIDATION	1
		REACTOME_SYNTHESIS_OF_VERY_LONG_CHAIN_FATTY_ACYL_COAS	1
		REACTOME_DNA_REPLICATION	1
		REACTOME_CLEAVAGE_OF_GROWING_TRANSCRIPT_IN_THE_TERMINATION_REGION_	1
		REACTOME_PKB_MEDIATED_EVENTS	1
		REACTOME_E2F_MEDIATED_REGULATION_OF_DNA_REPLICATION	1
		REACTOME_METABOLISM_OF_CARBOHYDRATES	1
		REACTOME_HORMONE_SENSITIVE_LIPASE_HSL_MEDIATED_TRIACYLGLYCEROL_HYDROLYSIS	1
		REACTOME_SIGNALING_BY_INSULIN_RECEPTOR	1
		REACTOME_SIGNAL_ATTENUATION	1
		REACTOME_SOS_MEDIATED_SIGNALLING	1
		REACTOME_RNA_POL_III_TRANSCRIPTION_INITIATION_FROM_TYPE_3_PROMOTER	1
		REACTOME_LIPID_DIGESTION_MOBILIZATION_AND_TRANSPORT	1
		REACTOME_INFLUENZA_LIFE_CYCLE	1
		REACTOME_INFLUENZA_VIRAL_RNA_TRANSCRIPTION_AND_REPLICATION	1
		REACTOME_NEP_NS2_INTERACTS_WITH_THE_CELLULAR_EXPORT_MACHINERY	1
		REACTOME_HIV_INFECTION	1
		REACTOME_TRANSPORT_OF_RIBONUCLEOPROTEINS_INTO_THE_HOST_NUCLEUS	1
		REACTOME_ABORTIVE_ELONGATION_OF_HIV1_TRANSCRIPT_IN_THE_ABSENCE_OF_TAT	1
		REACTOME_HOST_INTERACTIONS_OF_HIV_FACTORS	1
		REACTOME_RNA_POL_III_TRANSCRIPTION_TERMINATION	1
		REACTOME_FORMATION_OF_THE_HIV1_EARLY_ELONGATION_COMPLEX	1
		REACTOME_RAF_MAP_KINASE_CASCADE	1
		REACTOME_VIRAL_MESSENGER_RNA_SYNTHESIS	1
		REACTOME_SHC_MEDIATED_SIGNALLING	1
		REACTOME_INTERACTIONS_OF_VPR_WITH_HOST_CELLULAR_PROTEINS	1
		REACTOME_FORMATION_OF_ATP_BY_CHEMIOSMOTIC_COUPLING	1
		REACTOME_APC_C_CDH1_MEDIATED_DEGRADATION_OF_CDC20_AND_OTHER_APC_C_CDH1_TARGETED_PROTEINS_IN_LATE_MITOSIS_EARLY_G1	1
		REACTOME_ACTIVATION_OF_ATR_IN_RESPONSE_TO_REPLICATION_STRESS	1
		REACTOME_UNWINDING_OF_DNA	1
		REACTOME_APC_C_CDC20_MEDIATED_DEGRADATION_OF_MITOTIC_PROTEINS	1
		REACTOME_GLUCURONIDATION	1
		REACTOME_REGULATION_OF_GLUCOKINASE_BY_GLUCOKINASE_REGULATORY_PROTEIN	1
		REACTOME_APC_C_CDC20_MEDIATED_DEGRADATION_OF_CYCLIN_B	1
		REACTOME_LIPOPROTEIN_METABOLISM	1
		REACTOME_G1_S_SPECIFIC_TRANSCRIPTION	1
		REACTOME_THE_ROLE_OF_NEF_IN_HIV1_REPLICATION_AND_DISEASE_PATHOGENESIS	1
		REACTOME_CHYLOMICRON_MEDIATED_LIPID_TRANSPORT	1
		REACTOME_SIGNALING_BY_TGF_BETA_RECEPTOR_COMPLEX	1
		REACTOME_CONVERSION_FROM_APC_C_CDC20_TO_APC_C_CDH1_IN_LATE_ANAPHASE	1
		REACTOME_BINDING_AND_ENTRY_OF_HIV_VIRION	1
		REACTOME_PHOSPHORYLATION_OF_THE_APC_C	1
		REACTOME_GLUTATHIONE_CONJUGATION	1
		REACTOME_COMPLEMENT_CASCADE	1
		REACTOME_PHASE_II_CONJUGATION	1
		REACTOME_MTORC1_MEDIATED_SIGNALLING	1
		REACTOME_GLUCOSE_METABOLISM	1
		REACTOME_RNA_POL_III_CHAIN_ELONGATION	1
		REACTOME_VOLTAGE_GATED_POTASSIUM_CHANNELS	1
		REACTOME_PIP3_ACTIVATES_AKT_SIGNALING	1
		REACTOME_TANDEM_PORE_DOMAIN_POTASSIUM_CHANNELS	1
		REACTOME_INWARDLY_RECTIFYING_K_CHANNELS	1
		REACTOME_PLATELET_ACTIVATION_SIGNALING_AND_AGGREGATION	1
		REACTOME_REMOVAL_OF_THE_FLAP_INTERMEDIATE_FROM_THE_C_STRAND	1
		REACTOME_CREATION_OF_C4_AND_C2_ACTIVATORS	1
		REACTOME_APC_CDC20_MEDIATED_DEGRADATION_OF_NEK2A	1
		REACTOME_INITIAL_TRIGGERING_OF_COMPLEMENT	1
		REACTOME_EXTENSION_OF_TELOMERES	1
		REACTOME_G2_M_CHECKPOINTS	1
		REACTOME_G2_M_DNA_DAMAGE_CHECKPOINT	1
		REACTOME_S_PHASE	1
		REACTOME_DNA_STRAND_ELONGATION	1
		REACTOME_RESOLUTION_OF_AP_SITES_VIA_THE_SINGLE_NUCLEOTIDE_REPLACEMENT_PATHWAY	1
		REACTOME_FGFR_LIGAND_BINDING_AND_ACTIVATION	1
		REACTOME_CHOLESTEROL_BIOSYNTHESIS	1
		REACTOME_GAP_JUNCTION_TRAFFICKING	1
		REACTOME_METABOLISM_OF_PORPHYRINS	1
		REACTOME_SIGNALING_BY_FGFR	1
		REACTOME_DIGESTION_OF_DIETARY_CARBOHYDRATE	1
		REACTOME_GAP_JUNCTION_ASSEMBLY	1
		REACTOME_SYNTHESIS_OF_GLYCOSYLPHOSPHATIDYLINOSITOL_GPI	1
		REACTOME_RNA_POL_I_TRANSCRIPTION_INITIATION	1
		REACTOME_PI3K_CASCADE	1
		REACTOME_APOPTOTIC_EXECUTION_PHASE	1
		REACTOME_SHC_RELATED_EVENTS	1
		NABA_COLLAGENS	1
		NABA_ECM_GLYCOPROTEINS	1
		NABA_PROTEOGLYCANS	1
		NABA_CORE_MATRISOME	1
		NABA_BASEMENT_MEMBRANES	1

## Sheet: Supplementary Table 3
Hallmark gene set	Hallmark erichment p-value after Benjamini-Hochberg adjustment	Canonical pathway	Pathway enrichment p-value after Benjamini-Hochberg adjustment
HALLMARK_ADIPOGENESIS	4.45777e-06	PID_INTEGRIN3_PATHWAY	0.0168828
HALLMARK_ESTROGEN_RESPONSE_EARLY	5.19622e-06	REACTOME_METABOLISM_OF_LIPIDS_AND_LIPOPROTEINS	0.0168828
HALLMARK_ESTROGEN_RESPONSE_LATE	0.000199983	REACTOME_BIOLOGICAL_OXIDATIONS	0.042432
HALLMARK_XENOBIOTIC_METABOLISM	0.000869064	KEGG_SULFUR_METABOLISM	0.0535203
HALLMARK_ANDROGEN_RESPONSE	0.00184276	REACTOME_PASSIVE_TRANSPORT_BY_AQUAPORINS	0.0535203
HALLMARK_EPITHELIAL_MESENCHYMAL_TRANSITION	0.00184276	KEGG_P53_SIGNALING_PATHWAY	0.0812704
HALLMARK_FATTY_ACID_METABOLISM	0.00184276	NABA_CORE_MATRISOME	0.0812704
HALLMARK_BILE_ACID_METABOLISM	0.00184276	REACTOME_REGULATION_OF_COMPLEMENT_CASCADE	0.0825715
HALLMARK_P53_PATHWAY	0.00392873	KEGG_PRIMARY_BILE_ACID_BIOSYNTHESIS	0.0963692
HALLMARK_UV_RESPONSE_DN	0.00392873	KEGG_TRYPTOPHAN_METABOLISM	0.0963692
HALLMARK_CHOLESTEROL_HOMEOSTASIS	0.00636411	KEGG_BUTANOATE_METABOLISM	0.0963692
HALLMARK_COAGULATION	0.0190897	KEGG_PROXIMAL_TUBULE_BICARBONATE_RECLAMATION	0.0963692
HALLMARK_ANGIOGENESIS	0.0382444	REACTOME_FATTY_ACID_TRIACYLGLYCEROL_AND_KETONE_BODY_METABOLISM	0.0963692
HALLMARK_REACTIVE_OXIGEN_SPECIES_PATHWAY	0.087885	NABA_MATRISOME	0.0963692
HALLMARK_INTERFERON_ALPHA_RESPONSE	0.253964	KEGG_GLUTATHIONE_METABOLISM	0.102862
HALLMARK_HEME_METABOLISM	0.253964	KEGG_ARACHIDONIC_ACID_METABOLISM	0.102862
HALLMARK_NOTCH_SIGNALING	0.266448	KEGG_METABOLISM_OF_XENOBIOTICS_BY_CYTOCHROME_P450	0.102862
HALLMARK_TNFA_SIGNALING_VIA_NFKB	0.313931	BIOCARTA_CELLCYCLE_PATHWAY	0.102862
HALLMARK_HYPOXIA	0.313931	PID_INTEGRIN1_PATHWAY	0.10746
HALLMARK_MTORC1_SIGNALING	0.313931	REACTOME_TRANSMEMBRANE_TRANSPORT_OF_SMALL_MOLECULES	0.10746
HALLMARK_IL2_STAT5_SIGNALING	0.369562	NABA_ECM_GLYCOPROTEINS	0.10746
HALLMARK_PEROXISOME	0.38022	REACTOME_METABOLISM_OF_RNA	0.125909
HALLMARK_KRAS_SIGNALING_DN	0.38022	REACTOME_SYNTHESIS_OF_BILE_ACIDS_AND_BILE_SALTS	0.131001
HALLMARK_UNFOLDED_PROTEIN_RESPONSE	0.382712	REACTOME_COMPLEMENT_CASCADE	0.131001
HALLMARK_UV_RESPONSE_UP	0.382712	KEGG_NEUROACTIVE_LIGAND_RECEPTOR_INTERACTION	0.141638
HALLMARK_INTERFERON_GAMMA_RESPONSE	0.411613	PID_HNF3A_PATHWAY	0.147045
HALLMARK_MYC_TARGETS_V1	0.411613	KEGG_BIOSYNTHESIS_OF_UNSATURATED_FATTY_ACIDS	0.14787
HALLMARK_APOPTOSIS	0.500907	KEGG_VALINE_LEUCINE_AND_ISOLEUCINE_DEGRADATION	0.150348
HALLMARK_MYOGENESIS	0.542148	REACTOME_AQUAPORIN_MEDIATED_TRANSPORT	0.150348
HALLMARK_ALLOGRAFT_REJECTION	0.542148	KEGG_PEROXISOME	0.154859
HALLMARK_SPERMATOGENESIS	0.542148	REACTOME_ACYL_CHAIN_REMODELLING_OF_PC	0.160737
HALLMARK_TGF_BETA_SIGNALING	0.699405	REACTOME_ION_TRANSPORT_BY_P_TYPE_ATPASES	0.160737
HALLMARK_MITOTIC_SPINDLE	0.739467	BIOCARTA_VITCB_PATHWAY	0.189097
HALLMARK_IL6_JAK_STAT3_SIGNALING	0.739467	REACTOME_INTEGRIN_CELL_SURFACE_INTERACTIONS	0.189097
HALLMARK_COMPLEMENT	0.739467	REACTOME_CYTOSOLIC_SULFONATION_OF_SMALL_MOLECULES	0.189097
HALLMARK_E2F_TARGETS	0.739467	KEGG_PPAR_SIGNALING_PATHWAY	0.192254
HALLMARK_INFLAMMATORY_RESPONSE	0.739467	REACTOME_PHASE1_FUNCTIONALIZATION_OF_COMPOUNDS	0.192254
HALLMARK_KRAS_SIGNALING_UP	0.739467	BIOCARTA_AMI_PATHWAY	0.195159
HALLMARK_APICAL_SURFACE	0.809885	REACTOME_GPCR_DOWNSTREAM_SIGNALING	0.195159
HALLMARK_PROTEIN_SECRETION	0.973121	REACTOME_PHASE_II_CONJUGATION	0.195159
HALLMARK_G2M_CHECKPOINT	0.985204	REACTOME_ADAPTIVE_IMMUNE_SYSTEM	0.195159
HALLMARK_APICAL_JUNCTION	0.985204	KEGG_PYRUVATE_METABOLISM	0.211799
HALLMARK_GLYCOLYSIS	0.985204	REACTOME_SYNTHESIS_OF_PA	0.211799
HALLMARK_WNT_BETA_CATENIN_SIGNALING	1	PID_RB_1PATHWAY	0.21342
HALLMARK_DNA_REPAIR	1	KEGG_GLYCEROPHOSPHOLIPID_METABOLISM	0.227951
HALLMARK_HEDGEHOG_SIGNALING	1	REACTOME_SYNTHESIS_OF_BILE_ACIDS_AND_BILE_SALTS_VIA_7ALPHA_HYDROXYCHOLESTEROL	0.244247
HALLMARK_PI3K_AKT_MTOR_SIGNALING	1	REACTOME_ACYL_CHAIN_REMODELLING_OF_PS	0.244247
HALLMARK_MYC_TARGETS_V2	1	REACTOME_REGULATION_OF_WATER_BALANCE_BY_RENAL_AQUAPORINS	0.244325
HALLMARK_OXIDATIVE_PHOSPHORYLATION	1	BIOCARTA_INTRINSIC_PATHWAY	0.244464
HALLMARK_PANCREAS_BETA_CELLS	1	REACTOME_CLASS_A1_RHODOPSIN_LIKE_RECEPTORS	0.244464
		REACTOME_TRANSCRIPTIONAL_REGULATION_OF_WHITE_ADIPOCYTE_DIFFERENTIATION	0.244464
		KEGG_LYSINE_DEGRADATION	0.261402
		BIOCARTA_ACE2_PATHWAY	0.261402
		REACTOME_BILE_ACID_AND_BILE_SALT_METABOLISM	0.261402
		REACTOME_ACYL_CHAIN_REMODELLING_OF_PG	0.261402
		REACTOME_METABOLISM_OF_MRNA	0.261402
		REACTOME_APC_C_CDC20_MEDIATED_DEGRADATION_OF_CYCLIN_B	0.261402
		KEGG_FATTY_ACID_METABOLISM	0.285649
		BIOCARTA_PLATELETAPP_PATHWAY	0.304716
		KEGG_ETHER_LIPID_METABOLISM	0.321518
		REACTOME_HIV_INFECTION	0.339593
		REACTOME_GLUTAMATE_NEUROTRANSMITTER_RELEASE_CYCLE	0.347075
		REACTOME_AMINO_ACID_SYNTHESIS_AND_INTERCONVERSION_TRANSAMINATION	0.347075
		KEGG_STEROID_HORMONE_BIOSYNTHESIS	0.347794
		PID_AVB3_INTEGRIN_PATHWAY	0.347794
		REACTOME_PPARA_ACTIVATES_GENE_EXPRESSION	0.366346
		KEGG_STEROID_BIOSYNTHESIS	0.38509
		REACTOME_GLUTATHIONE_CONJUGATION	0.38509
		PID_PLK1_PATHWAY	0.3964
		PID_SYNDECAN_1_PATHWAY	0.427861
		REACTOME_ACYL_CHAIN_REMODELLING_OF_PE	0.429748
		REACTOME_PEROXISOMAL_LIPID_METABOLISM	0.429748
		KEGG_ECM_RECEPTOR_INTERACTION	0.443778
		PID_NFAT_TFPATHWAY	0.443778
		REACTOME_ETHANOL_OXIDATION	0.443778
		REACTOME_G2_M_DNA_DAMAGE_CHECKPOINT	0.443778
		NABA_BASEMENT_MEMBRANES	0.456431
		KEGG_TGF_BETA_SIGNALING_PATHWAY	0.477868
		WNT_SIGNALING	0.477868
		REACTOME_DEVELOPMENTAL_BIOLOGY	0.480322
		REACTOME_NEUROTRANSMITTER_RELEASE_CYCLE	0.480322
		NABA_COLLAGENS	0.480322
		NABA_ECM_REGULATORS	0.480322
		KEGG_DRUG_METABOLISM_CYTOCHROME_P450	0.506787
		KEGG_CHEMOKINE_SIGNALING_PATHWAY	0.506787
		REACTOME_COLLAGEN_FORMATION	0.506787
		REACTOME_RECRUITMENT_OF_NUMA_TO_MITOTIC_CENTROSOMES	0.506787
		REACTOME_ION_CHANNEL_TRANSPORT	0.506787
		REACTOME_HIV_LIFE_CYCLE	0.506787
		REACTOME_ANTIGEN_PROCESSING_UBIQUITINATION_PROTEASOME_DEGRADATION	0.506787
		REACTOME_IMMUNE_SYSTEM	0.506853
		PID_FRA_PATHWAY	0.508659
		REACTOME_SIGNALING_BY_THE_B_CELL_RECEPTOR_BCR	0.508659
		REACTOME_CHOLESTEROL_BIOSYNTHESIS	0.508659
		REACTOME_CYTOKINE_SIGNALING_IN_IMMUNE_SYSTEM	0.520873
		REACTOME_E2F_ENABLED_INHIBITION_OF_PRE_REPLICATION_COMPLEX_FORMATION	0.573529
		REACTOME_SIGNALING_BY_GPCR	0.606119
		REACTOME_YAP1_AND_WWTR1_TAZ_STIMULATED_GENE_EXPRESSION	0.618113
		REACTOME_BASIGIN_INTERACTIONS	0.618113
		PID_FOXM1_PATHWAY	0.621272
		KEGG_TOLL_LIKE_RECEPTOR_SIGNALING_PATHWAY	0.661829
		PID_ECADHERIN_STABILIZATION_PATHWAY	0.661829
		REACTOME_LATE_PHASE_OF_HIV_LIFE_CYCLE	0.661829
		REACTOME_NCAM1_INTERACTIONS	0.702811
		KEGG_LINOLEIC_ACID_METABOLISM	0.718986
		PID_WNT_SIGNALING_PATHWAY	0.718986
		BIOCARTA_SRCRPTP_PATHWAY	0.73513
		BIOCARTA_PTC1_PATHWAY	0.73513
		REACTOME_TRANSPORT_OF_ORGANIC_ANIONS	0.73513
		REACTOME_METABOLISM_OF_PROTEINS	0.741711
		REACTOME_EXTRACELLULAR_MATRIX_ORGANIZATION	0.743042
		PID_HNF3B_PATHWAY	0.75249
		REACTOME_GOLGI_ASSOCIATED_VESICLE_BIOGENESIS	0.75249
		KEGG_RETINOL_METABOLISM	0.775695
		BIOCARTA_AKAP95_PATHWAY	0.775695
		BIOCARTA_EDG1_PATHWAY	0.775695
		PID_ALK1_PATHWAY	0.775695
		REACTOME_GLYCEROPHOSPHOLIPID_BIOSYNTHESIS	0.775695
		REACTOME_CYTOCHROME_P450_ARRANGED_BY_SUBSTRATE_TYPE	0.775695
		REACTOME_SIGNALING_BY_PDGF	0.775695
		REACTOME_PHOSPHORYLATION_OF_THE_APC_C	0.775695
		KEGG_ALANINE_ASPARTATE_AND_GLUTAMATE_METABOLISM	0.791078
		KEGG_PROPANOATE_METABOLISM	0.791078
		KEGG_ERBB_SIGNALING_PATHWAY	0.791078
		REACTOME_METABOLISM_OF_VITAMINS_AND_COFACTORS	0.791078
		REACTOME_DOWNSTREAM_SIGNALING_EVENTS_OF_B_CELL_RECEPTOR_BCR	0.791078
		REACTOME_TRIGLYCERIDE_BIOSYNTHESIS	0.791078
		REACTOME_CELL_SURFACE_INTERACTIONS_AT_THE_VASCULAR_WALL	0.791078
		REACTOME_SYNTHESIS_OF_DNA	0.791078
		REACTOME_INFLUENZA_LIFE_CYCLE	0.791078
		BIOCARTA_RB_PATHWAY	0.802108
		REACTOME_ACYL_CHAIN_REMODELLING_OF_PI	0.802108
		REACTOME_XENOBIOTICS	0.802108
		REACTOME_MITOCHONDRIAL_FATTY_ACID_BETA_OXIDATION	0.802108
		REACTOME_REGULATION_OF_IFNG_SIGNALING	0.802108
		PID_TCR_CALCIUM_PATHWAY	0.80912
		REACTOME_CELL_JUNCTION_ORGANIZATION	0.80912
		REACTOME_NCAM_SIGNALING_FOR_NEURITE_OUT_GROWTH	0.844725
		PID_DELTA_NP63_PATHWAY	0.856116
		PID_SYNDECAN_4_PATHWAY	0.85998
		KEGG_ALPHA_LINOLENIC_ACID_METABOLISM	0.874721
		REACTOME_APOPTOSIS	0.896946
		KEGG_COMPLEMENT_AND_COAGULATION_CASCADES	0.901509
		PID_RETINOIC_ACID_PATHWAY	0.904682
		REACTOME_TRANS_GOLGI_NETWORK_VESICLE_BUDDING	0.925226
		REACTOME_MITOCHONDRIAL_TRNA_AMINOACYLATION	0.945214
		REACTOME_CYCLIN_A_B1_ASSOCIATED_EVENTS_DURING_G2_M_TRANSITION	0.945214
		NABA_MATRISOME_ASSOCIATED	0.963411
		PID_MYC_ACTIV_PATHWAY	0.997402
		KEGG_GLYCOLYSIS_GLUCONEOGENESIS	1
		KEGG_CITRATE_CYCLE_TCA_CYCLE	1
		KEGG_PENTOSE_PHOSPHATE_PATHWAY	1
		KEGG_PENTOSE_AND_GLUCURONATE_INTERCONVERSIONS	1
		KEGG_FRUCTOSE_AND_MANNOSE_METABOLISM	1
		KEGG_GALACTOSE_METABOLISM	1
		KEGG_ASCORBATE_AND_ALDARATE_METABOLISM	1
		KEGG_OXIDATIVE_PHOSPHORYLATION	1
		KEGG_PURINE_METABOLISM	1
		KEGG_PYRIMIDINE_METABOLISM	1
		KEGG_GLYCINE_SERINE_AND_THREONINE_METABOLISM	1
		KEGG_CYSTEINE_AND_METHIONINE_METABOLISM	1
		KEGG_VALINE_LEUCINE_AND_ISOLEUCINE_BIOSYNTHESIS	1
		KEGG_ARGININE_AND_PROLINE_METABOLISM	1
		KEGG_HISTIDINE_METABOLISM	1
		KEGG_TYROSINE_METABOLISM	1
		KEGG_PHENYLALANINE_METABOLISM	1
		KEGG_BETA_ALANINE_METABOLISM	1
		KEGG_TAURINE_AND_HYPOTAURINE_METABOLISM	1
		KEGG_SELENOAMINO_ACID_METABOLISM	1
		KEGG_STARCH_AND_SUCROSE_METABOLISM	1
		KEGG_N_GLYCAN_BIOSYNTHESIS	1
		KEGG_OTHER_GLYCAN_DEGRADATION	1
		KEGG_O_GLYCAN_BIOSYNTHESIS	1
		KEGG_AMINO_SUGAR_AND_NUCLEOTIDE_SUGAR_METABOLISM	1
		KEGG_GLYCOSAMINOGLYCAN_DEGRADATION	1
		KEGG_GLYCOSAMINOGLYCAN_BIOSYNTHESIS_CHONDROITIN_SULFATE	1
		KEGG_GLYCOSAMINOGLYCAN_BIOSYNTHESIS_KERATAN_SULFATE	1
		KEGG_GLYCOSAMINOGLYCAN_BIOSYNTHESIS_HEPARAN_SULFATE	1
		KEGG_GLYCEROLIPID_METABOLISM	1
		KEGG_INOSITOL_PHOSPHATE_METABOLISM	1
		KEGG_GLYCOSYLPHOSPHATIDYLINOSITOL_GPI_ANCHOR_BIOSYNTHESIS	1
		KEGG_SPHINGOLIPID_METABOLISM	1
		KEGG_GLYCOSPHINGOLIPID_BIOSYNTHESIS_LACTO_AND_NEOLACTO_SERIES	1
		KEGG_GLYCOSPHINGOLIPID_BIOSYNTHESIS_GLOBO_SERIES	1
		KEGG_GLYCOSPHINGOLIPID_BIOSYNTHESIS_GANGLIO_SERIES	1
		KEGG_GLYOXYLATE_AND_DICARBOXYLATE_METABOLISM	1
		KEGG_ONE_CARBON_POOL_BY_FOLATE	1
		KEGG_RIBOFLAVIN_METABOLISM	1
		KEGG_NICOTINATE_AND_NICOTINAMIDE_METABOLISM	1
		KEGG_PANTOTHENATE_AND_COA_BIOSYNTHESIS	1
		KEGG_FOLATE_BIOSYNTHESIS	1
		KEGG_PORPHYRIN_AND_CHLOROPHYLL_METABOLISM	1
		KEGG_TERPENOID_BACKBONE_BIOSYNTHESIS	1
		KEGG_LIMONENE_AND_PINENE_DEGRADATION	1
		KEGG_NITROGEN_METABOLISM	1
		KEGG_AMINOACYL_TRNA_BIOSYNTHESIS	1
		KEGG_DRUG_METABOLISM_OTHER_ENZYMES	1
		KEGG_ABC_TRANSPORTERS	1
		KEGG_RIBOSOME	1
		KEGG_RNA_DEGRADATION	1
		KEGG_RNA_POLYMERASE	1
		KEGG_BASAL_TRANSCRIPTION_FACTORS	1
		KEGG_DNA_REPLICATION	1
		KEGG_SPLICEOSOME	1
		KEGG_PROTEASOME	1
		KEGG_PROTEIN_EXPORT	1
		KEGG_BASE_EXCISION_REPAIR	1
		KEGG_NUCLEOTIDE_EXCISION_REPAIR	1
		KEGG_MISMATCH_REPAIR	1
		KEGG_HOMOLOGOUS_RECOMBINATION	1
		KEGG_NON_HOMOLOGOUS_END_JOINING	1
		KEGG_MAPK_SIGNALING_PATHWAY	1
		KEGG_CALCIUM_SIGNALING_PATHWAY	1
		KEGG_CYTOKINE_CYTOKINE_RECEPTOR_INTERACTION	1
		KEGG_PHOSPHATIDYLINOSITOL_SIGNALING_SYSTEM	1
		KEGG_CELL_CYCLE	1
		KEGG_OOCYTE_MEIOSIS	1
		KEGG_UBIQUITIN_MEDIATED_PROTEOLYSIS	1
		KEGG_SNARE_INTERACTIONS_IN_VESICULAR_TRANSPORT	1
		KEGG_REGULATION_OF_AUTOPHAGY	1
		KEGG_LYSOSOME	1
		KEGG_ENDOCYTOSIS	1
		KEGG_MTOR_SIGNALING_PATHWAY	1
		KEGG_APOPTOSIS	1
		KEGG_CARDIAC_MUSCLE_CONTRACTION	1
		KEGG_VASCULAR_SMOOTH_MUSCLE_CONTRACTION	1
		KEGG_WNT_SIGNALING_PATHWAY	1
		KEGG_DORSO_VENTRAL_AXIS_FORMATION	1
		KEGG_NOTCH_SIGNALING_PATHWAY	1
		KEGG_HEDGEHOG_SIGNALING_PATHWAY	1
		KEGG_AXON_GUIDANCE	1
		KEGG_VEGF_SIGNALING_PATHWAY	1
		KEGG_FOCAL_ADHESION	1
		KEGG_CELL_ADHESION_MOLECULES_CAMS	1
		KEGG_ADHERENS_JUNCTION	1
		KEGG_TIGHT_JUNCTION	1
		KEGG_GAP_JUNCTION	1
		KEGG_ANTIGEN_PROCESSING_AND_PRESENTATION	1
		KEGG_RENIN_ANGIOTENSIN_SYSTEM	1
		KEGG_NOD_LIKE_RECEPTOR_SIGNALING_PATHWAY	1
		KEGG_RIG_I_LIKE_RECEPTOR_SIGNALING_PATHWAY	1
		KEGG_CYTOSOLIC_DNA_SENSING_PATHWAY	1
		KEGG_JAK_STAT_SIGNALING_PATHWAY	1
		KEGG_HEMATOPOIETIC_CELL_LINEAGE	1
		KEGG_NATURAL_KILLER_CELL_MEDIATED_CYTOTOXICITY	1
		KEGG_T_CELL_RECEPTOR_SIGNALING_PATHWAY	1
		KEGG_B_CELL_RECEPTOR_SIGNALING_PATHWAY	1
		KEGG_FC_EPSILON_RI_SIGNALING_PATHWAY	1
		KEGG_FC_GAMMA_R_MEDIATED_PHAGOCYTOSIS	1
		KEGG_LEUKOCYTE_TRANSENDOTHELIAL_MIGRATION	1
		KEGG_INTESTINAL_IMMUNE_NETWORK_FOR_IGA_PRODUCTION	1
		KEGG_CIRCADIAN_RHYTHM_MAMMAL	1
		KEGG_LONG_TERM_POTENTIATION	1
		KEGG_NEUROTROPHIN_SIGNALING_PATHWAY	1
		KEGG_LONG_TERM_DEPRESSION	1
		KEGG_OLFACTORY_TRANSDUCTION	1
		KEGG_TASTE_TRANSDUCTION	1
		KEGG_REGULATION_OF_ACTIN_CYTOSKELETON	1
		KEGG_INSULIN_SIGNALING_PATHWAY	1
		KEGG_GNRH_SIGNALING_PATHWAY	1
		KEGG_PROGESTERONE_MEDIATED_OOCYTE_MATURATION	1
		KEGG_MELANOGENESIS	1
		KEGG_ADIPOCYTOKINE_SIGNALING_PATHWAY	1
		KEGG_TYPE_II_DIABETES_MELLITUS	1
		KEGG_TYPE_I_DIABETES_MELLITUS	1
		KEGG_MATURITY_ONSET_DIABETES_OF_THE_YOUNG	1
		KEGG_ALDOSTERONE_REGULATED_SODIUM_REABSORPTION	1
		KEGG_VASOPRESSIN_REGULATED_WATER_REABSORPTION	1
		KEGG_ALZHEIMERS_DISEASE	1
		KEGG_PARKINSONS_DISEASE	1
		KEGG_AMYOTROPHIC_LATERAL_SCLEROSIS_ALS	1
		KEGG_HUNTINGTONS_DISEASE	1
		KEGG_PRION_DISEASES	1
		KEGG_VIBRIO_CHOLERAE_INFECTION	1
		KEGG_EPITHELIAL_CELL_SIGNALING_IN_HELICOBACTER_PYLORI_INFECTION	1
		KEGG_PATHOGENIC_ESCHERICHIA_COLI_INFECTION	1
		KEGG_LEISHMANIA_INFECTION	1
		KEGG_PATHWAYS_IN_CANCER	1
		KEGG_COLORECTAL_CANCER	1
		KEGG_RENAL_CELL_CARCINOMA	1
		KEGG_PANCREATIC_CANCER	1
		KEGG_ENDOMETRIAL_CANCER	1
		KEGG_GLIOMA	1
		KEGG_PROSTATE_CANCER	1
		KEGG_THYROID_CANCER	1
		KEGG_BASAL_CELL_CARCINOMA	1
		KEGG_MELANOMA	1
		KEGG_BLADDER_CANCER	1
		KEGG_CHRONIC_MYELOID_LEUKEMIA	1
		KEGG_ACUTE_MYELOID_LEUKEMIA	1
		KEGG_SMALL_CELL_LUNG_CANCER	1
		KEGG_NON_SMALL_CELL_LUNG_CANCER	1
		KEGG_ASTHMA	1
		KEGG_AUTOIMMUNE_THYROID_DISEASE	1
		KEGG_SYSTEMIC_LUPUS_ERYTHEMATOSUS	1
		KEGG_ALLOGRAFT_REJECTION	1
		KEGG_GRAFT_VERSUS_HOST_DISEASE	1
		KEGG_PRIMARY_IMMUNODEFICIENCY	1
		KEGG_HYPERTROPHIC_CARDIOMYOPATHY_HCM	1
		KEGG_ARRHYTHMOGENIC_RIGHT_VENTRICULAR_CARDIOMYOPATHY_ARVC	1
		KEGG_DILATED_CARDIOMYOPATHY	1
		KEGG_VIRAL_MYOCARDITIS	1
		BIOCARTA_RELA_PATHWAY	1
		BIOCARTA_NO1_PATHWAY	1
		BIOCARTA_CSK_PATHWAY	1
		BIOCARTA_GRANULOCYTES_PATHWAY	1
		BIOCARTA_LYM_PATHWAY	1
		BIOCARTA_ARAP_PATHWAY	1
		BIOCARTA_AGR_PATHWAY	1
		BIOCARTA_AKT_PATHWAY	1
		BIOCARTA_ALK_PATHWAY	1
		BIOCARTA_AT1R_PATHWAY	1
		BIOCARTA_ASBCELL_PATHWAY	1
		BIOCARTA_DNAFRAGMENT_PATHWAY	1
		BIOCARTA_CHEMICAL_PATHWAY	1
		BIOCARTA_SPPA_PATHWAY	1
		BIOCARTA_ATM_PATHWAY	1
		BIOCARTA_AGPCR_PATHWAY	1
		BIOCARTA_BCELLSURVIVAL_PATHWAY	1
		BIOCARTA_BLYMPHOCYTE_PATHWAY	1
		BIOCARTA_BCR_PATHWAY	1
		BIOCARTA_BIOPEPTIDES_PATHWAY	1
		BIOCARTA_NEUROTRANSMITTERS_PATHWAY	1
		BIOCARTA_RANKL_PATHWAY	1
		BIOCARTA_CACAM_PATHWAY	1
		BIOCARTA_CDMAC_PATHWAY	1
		BIOCARTA_CARM_ER_PATHWAY	1
		BIOCARTA_CASPASE_PATHWAY	1
		BIOCARTA_CBL_PATHWAY	1
		BIOCARTA_CCR3_PATHWAY	1
		BIOCARTA_CD40_PATHWAY	1
		BIOCARTA_MCM_PATHWAY	1
		BIOCARTA_G1_PATHWAY	1
		BIOCARTA_G2_PATHWAY	1
		BIOCARTA_CELL2CELL_PATHWAY	1
		BIOCARTA_LAIR_PATHWAY	1
		BIOCARTA_CERAMIDE_PATHWAY	1
		BIOCARTA_TID_PATHWAY	1
		BIOCARTA_CLASSIC_PATHWAY	1
		BIOCARTA_COMP_PATHWAY	1
		BIOCARTA_VDR_PATHWAY	1
		BIOCARTA_HDAC_PATHWAY	1
		BIOCARTA_GCR_PATHWAY	1
		BIOCARTA_CTCF_PATHWAY	1
		BIOCARTA_CTL_PATHWAY	1
		BIOCARTA_CXCR4_PATHWAY	1
		BIOCARTA_CFTR_PATHWAY	1
		BIOCARTA_CYTOKINE_PATHWAY	1
		BIOCARTA_INFLAM_PATHWAY	1
		BIOCARTA_D4GDI_PATHWAY	1
		BIOCARTA_DC_PATHWAY	1
		BIOCARTA_P35ALZHEIMERS_PATHWAY	1
		BIOCARTA_RNA_PATHWAY	1
		BIOCARTA_MTA3_PATHWAY	1
		BIOCARTA_SKP2E2F_PATHWAY	1
		BIOCARTA_CALCINEURIN_PATHWAY	1
		BIOCARTA_EGF_PATHWAY	1
		BIOCARTA_ETC_PATHWAY	1
		BIOCARTA_NDKDYNAMIN_PATHWAY	1
		BIOCARTA_EPHA4_PATHWAY	1
		BIOCARTA_EPO_PATHWAY	1
		BIOCARTA_ECM_PATHWAY	1
		BIOCARTA_ERK_PATHWAY	1
		BIOCARTA_ERYTH_PATHWAY	1
		BIOCARTA_EPONFKB_PATHWAY	1
		BIOCARTA_EIF_PATHWAY	1
		BIOCARTA_EXTRINSIC_PATHWAY	1
		BIOCARTA_FAS_PATHWAY	1
		BIOCARTA_FCER1_PATHWAY	1
		BIOCARTA_FEEDER_PATHWAY	1
		BIOCARTA_FIBRINOLYSIS_PATHWAY	1
		BIOCARTA_FMLP_PATHWAY	1
		BIOCARTA_FREE_PATHWAY	1
		BIOCARTA_GABA_PATHWAY	1
		BIOCARTA_GATA3_PATHWAY	1
		BIOCARTA_GLYCOLYSIS_PATHWAY	1
		BIOCARTA_SET_PATHWAY	1
		BIOCARTA_GH_PATHWAY	1
		BIOCARTA_AHSP_PATHWAY	1
		BIOCARTA_TCAPOPTOSIS_PATHWAY	1
		BIOCARTA_HIVNEF_PATHWAY	1
		BIOCARTA_SALMONELLA_PATHWAY	1
		BIOCARTA_MPR_PATHWAY	1
		BIOCARTA_HCMV_PATHWAY	1
		BIOCARTA_P53HYPOXIA_PATHWAY	1
		BIOCARTA_HIF_PATHWAY	1
		BIOCARTA_IGF1_PATHWAY	1
		BIOCARTA_IL17_PATHWAY	1
		BIOCARTA_IL2_PATHWAY	1
		BIOCARTA_IL3_PATHWAY	1
		BIOCARTA_IL4_PATHWAY	1
		BIOCARTA_IL5_PATHWAY	1
		BIOCARTA_IL6_PATHWAY	1
		BIOCARTA_IL10_PATHWAY	1
		BIOCARTA_IL12_PATHWAY	1
		BIOCARTA_IL2RB_PATHWAY	1
		BIOCARTA_IL22BP_PATHWAY	1
		BIOCARTA_IL7_PATHWAY	1
		BIOCARTA_GSK3_PATHWAY	1
		BIOCARTA_DEATH_PATHWAY	1
		BIOCARTA_RACCYCD_PATHWAY	1
		BIOCARTA_GLEEVEC_PATHWAY	1
		BIOCARTA_INSULIN_PATHWAY	1
		BIOCARTA_INTEGRIN_PATHWAY	1
		BIOCARTA_KERATINOCYTE_PATHWAY	1
		BIOCARTA_TCRA_PATHWAY	1
		BIOCARTA_LECTIN_PATHWAY	1
		BIOCARTA_PYK2_PATHWAY	1
		BIOCARTA_EGFR_SMRTE_PATHWAY	1
		BIOCARTA_MAPK_PATHWAY	1
		BIOCARTA_MCALPAIN_PATHWAY	1
		BIOCARTA_PPARA_PATHWAY	1
		BIOCARTA_ETS_PATHWAY	1
		BIOCARTA_MONOCYTE_PATHWAY	1
		BIOCARTA_MTOR_PATHWAY	1
		BIOCARTA_IGF1R_PATHWAY	1
		BIOCARTA_PITX2_PATHWAY	1
		BIOCARTA_NGF_PATHWAY	1
		BIOCARTA_VIP_PATHWAY	1
		BIOCARTA_NFAT_PATHWAY	1
		BIOCARTA_NTHI_PATHWAY	1
		BIOCARTA_NFKB_PATHWAY	1
		BIOCARTA_NOS1_PATHWAY	1
		BIOCARTA_NO2IL12_PATHWAY	1
		BIOCARTA_RARRXR_PATHWAY	1
		BIOCARTA_NUCLEARRS_PATHWAY	1
		BIOCARTA_ARENRF2_PATHWAY	1
		BIOCARTA_P38MAPK_PATHWAY	1
		BIOCARTA_P53_PATHWAY	1
		BIOCARTA_PDGF_PATHWAY	1
		BIOCARTA_CCR5_PATHWAY	1
		BIOCARTA_PTDINS_PATHWAY	1
		BIOCARTA_PLCE_PATHWAY	1
		BIOCARTA_CDK5_PATHWAY	1
		BIOCARTA_MYOSIN_PATHWAY	1
		BIOCARTA_PS1_PATHWAY	1
		BIOCARTA_PROTEASOME_PATHWAY	1
		BIOCARTA_AKAPCENTROSOME_PATHWAY	1
		BIOCARTA_PTEN_PATHWAY	1
		BIOCARTA_RAB_PATHWAY	1
		BIOCARTA_RAC1_PATHWAY	1
		BIOCARTA_RAS_PATHWAY	1
		BIOCARTA_NKCELLS_PATHWAY	1
		BIOCARTA_CHREBP2_PATHWAY	1
		BIOCARTA_BAD_PATHWAY	1
		BIOCARTA_CK1_PATHWAY	1
		BIOCARTA_EIF2_PATHWAY	1
		BIOCARTA_EIF4_PATHWAY	1
		BIOCARTA_STEM_PATHWAY	1
		BIOCARTA_P27_PATHWAY	1
		BIOCARTA_PGC1A_PATHWAY	1
		BIOCARTA_PML_PATHWAY	1
		BIOCARTA_DREAM_PATHWAY	1
		BIOCARTA_LEPTIN_PATHWAY	1
		BIOCARTA_RHO_PATHWAY	1
		BIOCARTA_AKAP13_PATHWAY	1
		BIOCARTA_ATRBRCA_PATHWAY	1
		BIOCARTA_CARDIACEGF_PATHWAY	1
		BIOCARTA_HER2_PATHWAY	1
		BIOCARTA_ERK5_PATHWAY	1
		BIOCARTA_MAL_PATHWAY	1
		BIOCARTA_MEF2D_PATHWAY	1
		BIOCARTA_MITOCHONDRIA_PATHWAY	1
		BIOCARTA_ACH_PATHWAY	1
		BIOCARTA_PARKIN_PATHWAY	1
		BIOCARTA_CDC42RAC_PATHWAY	1
		BIOCARTA_RANMS_PATHWAY	1
		BIOCARTA_BARR_MAPK_PATHWAY	1
		BIOCARTA_TOB1_PATHWAY	1
		BIOCARTA_BARRESTIN_SRC_PATHWAY	1
		BIOCARTA_NKT_PATHWAY	1
		BIOCARTA_IL1R_PATHWAY	1
		BIOCARTA_MET_PATHWAY	1
		BIOCARTA_GPCR_PATHWAY	1
		BIOCARTA_IGF1MTOR_PATHWAY	1
		BIOCARTA_SODD_PATHWAY	1
		BIOCARTA_SHH_PATHWAY	1
		BIOCARTA_SPRY_PATHWAY	1
		BIOCARTA_BARRESTIN_PATHWAY	1
		BIOCARTA_STATHMIN_PATHWAY	1
		BIOCARTA_HSP27_PATHWAY	1
		BIOCARTA_TCR_PATHWAY	1
		BIOCARTA_TCYTOTOXIC_PATHWAY	1
		BIOCARTA_THELPER_PATHWAY	1
		BIOCARTA_TALL1_PATHWAY	1
		BIOCARTA_TEL_PATHWAY	1
		BIOCARTA_TGFB_PATHWAY	1
		BIOCARTA_TH1TH2_PATHWAY	1
		BIOCARTA_41BB_PATHWAY	1
		BIOCARTA_KREB_PATHWAY	1
		BIOCARTA_CTLA4_PATHWAY	1
		BIOCARTA_LONGEVITY_PATHWAY	1
		BIOCARTA_SARS_PATHWAY	1
		BIOCARTA_PAR1_PATHWAY	1
		BIOCARTA_STRESS_PATHWAY	1
		BIOCARTA_TNFR1_PATHWAY	1
		BIOCARTA_TNFR2_PATHWAY	1
		BIOCARTA_TOLL_PATHWAY	1
		BIOCARTA_TPO_PATHWAY	1
		BIOCARTA_CREB_PATHWAY	1
		BIOCARTA_CARM1_PATHWAY	1
		BIOCARTA_TFF_PATHWAY	1
		BIOCARTA_TRKA_PATHWAY	1
		BIOCARTA_ARF_PATHWAY	1
		BIOCARTA_UCALPAIN_PATHWAY	1
		BIOCARTA_VEGF_PATHWAY	1
		BIOCARTA_WNT_PATHWAY	1
		BIOCARTA_ACTINY_PATHWAY	1
		ST_INTERFERON_GAMMA_PATHWAY	1
		ST_WNT_CA2_CYCLIC_GMP_PATHWAY	1
		ST_DIFFERENTIATION_PATHWAY_IN_PC12_CELLS	1
		ST_TUMOR_NECROSIS_FACTOR_PATHWAY	1
		SA_B_CELL_RECEPTOR_COMPLEXES	1
		ST_ERK1_ERK2_MAPK_PATHWAY	1
		SIG_CD40PATHWAYMAP	1
		SIG_PIP3_SIGNALING_IN_CARDIAC_MYOCTES	1
		SA_CASPASE_CASCADE	1
		ST_GA12_PATHWAY	1
		ST_G_ALPHA_S_PATHWAY	1
		ST_G_ALPHA_I_PATHWAY	1
		SIG_CHEMOTAXIS	1
		ST_IL_13_PATHWAY	1
		ST_P38_MAPK_PATHWAY	1
		SIG_IL4RECEPTOR_IN_B_LYPHOCYTES	1
		ST_JAK_STAT_PATHWAY	1
		SIG_REGULATION_OF_THE_ACTIN_CYTOSKELETON_BY_RHO_GTPASES	1
		ST_GRANULE_CELL_SURVIVAL_PATHWAY	1
		ST_ADRENERGIC	1
		ST_INTEGRIN_SIGNALING_PATHWAY	1
		ST_GAQ_PATHWAY	1
		ST_GA13_PATHWAY	1
		ST_STAT3_PATHWAY	1
		SA_FAS_SIGNALING	1
		SA_G1_AND_S_PHASES	1
		SIG_INSULIN_RECEPTOR_PATHWAY_IN_CARDIAC_MYOCYTES	1
		ST_T_CELL_SIGNAL_TRANSDUCTION	1
		ST_TYPE_I_INTERFERON_PATHWAY	1
		ST_PAC1_RECEPTOR_PATHWAY	1
		SIG_PIP3_SIGNALING_IN_B_LYMPHOCYTES	1
		SIG_BCR_SIGNALING_PATHWAY	1
		SA_G2_AND_M_PHASES	1
		ST_B_CELL_ANTIGEN_RECEPTOR	1
		ST_INTERLEUKIN_4_PATHWAY	1
		ST_WNT_BETA_CATENIN_PATHWAY	1
		SA_MMP_CYTOKINE_CONNECTION	1
		ST_JNK_MAPK_PATHWAY	1
		SA_PROGRAMMED_CELL_DEATH	1
		ST_FAS_SIGNALING_PATHWAY	1
		ST_MYOCYTE_AD_PATHWAY	1
		SA_PTEN_PATHWAY	1
		SA_REG_CASCADE_OF_CYCLIN_EXPR	1
		SA_TRKA_RECEPTOR	1
		ST_PHOSPHOINOSITIDE_3_KINASE_PATHWAY	1
		PID_FANCONI_PATHWAY	1
		PID_SMAD2_3NUCLEAR_PATHWAY	1
		PID_FCER1_PATHWAY	1
		PID_ENDOTHELIN_PATHWAY	1
		PID_BCR_5PATHWAY	1
		PID_PRL_SIGNALING_EVENTS_PATHWAY	1
		PID_RHOA_PATHWAY	1
		PID_ERBB4_PATHWAY	1
		PID_AURORA_B_PATHWAY	1
		PID_LYSOPHOSPHOLIPID_PATHWAY	1
		PID_INSULIN_PATHWAY	1
		PID_NOTCH_PATHWAY	1
		PID_P73PATHWAY	1
		PID_P38_MKK3_6PATHWAY	1
		PID_GMCSF_PATHWAY	1
		PID_WNT_NONCANONICAL_PATHWAY	1
		PID_NFKAPPAB_ATYPICAL_PATHWAY	1
		PID_IL4_2PATHWAY	1
		PID_HDAC_CLASSII_PATHWAY	1
		PID_BETA_CATENIN_DEG_PATHWAY	1
		PID_HDAC_CLASSIII_PATHWAY	1
		PID_GLYPICAN_1PATHWAY	1
		PID_TCR_PATHWAY	1
		PID_IL27_PATHWAY	1
		PID_NFKAPPAB_CANONICAL_PATHWAY	1
		PID_E2F_PATHWAY	1
		PID_ER_NONGENOMIC_PATHWAY	1
		PID_DNA_PK_PATHWAY	1
		PID_HIF2PATHWAY	1
		PID_CD40_PATHWAY	1
		PID_ATR_PATHWAY	1
		PID_INTEGRIN_CS_PATHWAY	1
		PID_MET_PATHWAY	1
		PID_PTP1B_PATHWAY	1
		PID_IL12_2PATHWAY	1
		PID_S1P_S1P3_PATHWAY	1
		PID_LPA4_PATHWAY	1
		PID_AR_PATHWAY	1
		PID_EPHB_FWD_PATHWAY	1
		PID_AVB3_OPN_PATHWAY	1
		PID_S1P_S1P4_PATHWAY	1
		PID_ARF6_TRAFFICKING_PATHWAY	1
		PID_RHOA_REG_PATHWAY	1
		PID_REELIN_PATHWAY	1
		PID_PS1_PATHWAY	1
		PID_ILK_PATHWAY	1
		PID_NECTIN_PATHWAY	1
		PID_P38_ALPHA_BETA_PATHWAY	1
		PID_TRAIL_PATHWAY	1
		PID_CDC42_PATHWAY	1
		PID_RET_PATHWAY	1
		PID_CDC42_REG_PATHWAY	1
		PID_ATM_PATHWAY	1
		PID_ARF6_PATHWAY	1
		PID_LKB1_PATHWAY	1
		PID_CD8_TCR_PATHWAY	1
		PID_WNT_CANONICAL_PATHWAY	1
		PID_TCPTP_PATHWAY	1
		PID_ANGIOPOIETIN_RECEPTOR_PATHWAY	1
		PID_FAS_PATHWAY	1
		PID_CIRCADIAN_PATHWAY	1
		PID_TXA2PATHWAY	1
		PID_SHP2_PATHWAY	1
		PID_HDAC_CLASSI_PATHWAY	1
		PID_S1P_S1P1_PATHWAY	1
		PID_TELOMERASE_PATHWAY	1
		PID_NETRIN_PATHWAY	1
		PID_IL1_PATHWAY	1
		PID_NFAT_3PATHWAY	1
		PID_REG_GR_PATHWAY	1
		PID_CONE_PATHWAY	1
		PID_INTEGRIN_A9B1_PATHWAY	1
		PID_ERB_GENOMIC_PATHWAY	1
		PID_ARF6_DOWNSTREAM_PATHWAY	1
		PID_MTOR_4PATHWAY	1
		PID_IL2_1PATHWAY	1
		PID_CXCR4_PATHWAY	1
		PID_IGF1_PATHWAY	1
		PID_ERBB1_RECEPTOR_PROXIMAL_PATHWAY	1
		PID_TNF_PATHWAY	1
		PID_TCR_RAS_PATHWAY	1
		PID_IL5_PATHWAY	1
		PID_FOXO_PATHWAY	1
		PID_VEGF_VEGFR_PATHWAY	1
		PID_THROMBIN_PAR4_PATHWAY	1
		PID_MYC_PATHWAY	1
		PID_RANBP2_PATHWAY	1
		PID_PI3KCI_PATHWAY	1
		PID_AJDISS_2PATHWAY	1
		PID_IL2_PI3K_PATHWAY	1
		PID_CERAMIDE_PATHWAY	1
		PID_P53_DOWNSTREAM_PATHWAY	1
		PID_AR_TF_PATHWAY	1
		PID_P75_NTR_PATHWAY	1
		PID_S1P_META_PATHWAY	1
		PID_ECADHERIN_NASCENT_AJ_PATHWAY	1
		PID_INTEGRIN4_PATHWAY	1
		PID_AMB2_NEUTROPHILS_PATHWAY	1
		PID_IFNG_PATHWAY	1
		PID_RXR_VDR_PATHWAY	1
		PID_LIS1_PATHWAY	1
		PID_ERBB1_DOWNSTREAM_PATHWAY	1
		PID_ATF2_PATHWAY	1
		PID_AP1_PATHWAY	1
		PID_INTEGRIN2_PATHWAY	1
		PID_UPA_UPAR_PATHWAY	1
		PID_ERBB2_ERBB3_PATHWAY	1
		PID_EPHA_FWDPATHWAY	1
		PID_HIF1A_PATHWAY	1
		PID_BMP_PATHWAY	1
		PID_IL3_PATHWAY	1
		PID_IL6_7_PATHWAY	1
		PID_ECADHERIN_KERATINOCYTE_PATHWAY	1
		PID_PDGFRB_PATHWAY	1
		PID_TRKR_PATHWAY	1
		PID_TCR_JNK_PATHWAY	1
		PID_NEPHRIN_NEPH1_PATHWAY	1
		PID_CMYB_PATHWAY	1
		PID_IL23_PATHWAY	1
		PID_HIV_NEF_PATHWAY	1
		PID_P38_MK2_PATHWAY	1
		PID_ERA_GENOMIC_PATHWAY	1
		PID_ERBB_NETWORK_PATHWAY	1
		PID_ALK2_PATHWAY	1
		PID_RHODOPSIN_PATHWAY	1
		PID_PDGFRA_PATHWAY	1
		PID_P38_GAMMA_DELTA_PATHWAY	1
		PID_IL8_CXCR2_PATHWAY	1
		PID_HEDGEHOG_2PATHWAY	1
		PID_INTEGRIN5_PATHWAY	1
		PID_AR_NONGENOMIC_PATHWAY	1
		PID_ERBB1_INTERNALIZATION_PATHWAY	1
		PID_HEDGEHOG_GLI_PATHWAY	1
		PID_CASPASE_PATHWAY	1
		PID_CXCR3_PATHWAY	1
		PID_BETA_CATENIN_NUC_PATHWAY	1
		PID_VEGFR1_PATHWAY	1
		PID_SMAD2_3PATHWAY	1
		PID_P38_ALPHA_BETA_DOWNSTREAM_PATHWAY	1
		PID_KIT_PATHWAY	1
		PID_EPO_PATHWAY	1
		PID_IL2_STAT5_PATHWAY	1
		PID_VEGFR1_2_PATHWAY	1
		PID_THROMBIN_PAR1_PATHWAY	1
		PID_A6B1_A6B4_INTEGRIN_PATHWAY	1
		PID_SYNDECAN_2_PATHWAY	1
		PID_RAC1_REG_PATHWAY	1
		PID_AURORA_A_PATHWAY	1
		PID_ARF_3PATHWAY	1
		PID_INSULIN_GLUCOSE_PATHWAY	1
		PID_PI3KCI_AKT_PATHWAY	1
		PID_SYNDECAN_3_PATHWAY	1
		PID_IL8_CXCR1_PATHWAY	1
		PID_MYC_REPRESS_PATHWAY	1
		PID_HIF1_TFPATHWAY	1
		PID_TAP63_PATHWAY	1
		PID_EPHRINB_REV_PATHWAY	1
		PID_BARD1_PATHWAY	1
		PID_P53_REGULATION_PATHWAY	1
		PID_TOLL_ENDOGENOUS_PATHWAY	1
		PID_NCADHERIN_PATHWAY	1
		PID_ANTHRAX_PATHWAY	1
		PID_S1P_S1P2_PATHWAY	1
		PID_RAS_PATHWAY	1
		PID_MAPK_TRK_PATHWAY	1
		PID_PI3K_PLC_TRK_PATHWAY	1
		PID_CD8_TCR_DOWNSTREAM_PATHWAY	1
		PID_EPHA2_FWD_PATHWAY	1
		PID_LYMPH_ANGIOGENESIS_PATHWAY	1
		PID_ALPHA_SYNUCLEIN_PATHWAY	1
		PID_FGF_PATHWAY	1
		PID_INTEGRIN_A4B1_PATHWAY	1
		PID_RAC1_PATHWAY	1
		PID_FAK_PATHWAY	1
		PID_TGFBR_PATHWAY	1
		PID_HES_HEY_PATHWAY	1
		PID_IL12_STAT4_PATHWAY	1
		REACTOME_GLYCOGEN_BREAKDOWN_GLYCOGENOLYSIS	1
		REACTOME_TRANSLATION	1
		REACTOME_PYRIMIDINE_CATABOLISM	1
		REACTOME_RNA_POL_III_TRANSCRIPTION_INITIATION_FROM_TYPE_2_PROMOTER	1
		REACTOME_INHIBITION_OF_THE_PROTEOLYTIC_ACTIVITY_OF_APC_C_REQUIRED_FOR_THE_ONSET_OF_ANAPHASE_BY_MITOTIC_SPINDLE_CHECKPOINT_COMPONENTS	1
		REACTOME_PYRUVATE_METABOLISM_AND_CITRIC_ACID_TCA_CYCLE	1
		REACTOME_EXTRINSIC_PATHWAY_FOR_APOPTOSIS	1
		REACTOME_PTM_GAMMA_CARBOXYLATION_HYPUSINE_FORMATION_AND_ARYLSULFATASE_ACTIVATION	1
		REACTOME_APOPTOTIC_CLEAVAGE_OF_CELLULAR_PROTEINS	1
		REACTOME_RNA_POL_I_TRANSCRIPTION_TERMINATION	1
		REACTOME_FORMATION_OF_THE_TERNARY_COMPLEX_AND_SUBSEQUENTLY_THE_43S_COMPLEX	1
		REACTOME_ACTIVATION_OF_THE_PRE_REPLICATIVE_COMPLEX	1
		REACTOME_PROCESSING_OF_INTRONLESS_PRE_MRNAS	1
		REACTOME_GAP_JUNCTION_DEGRADATION	1
		REACTOME_BASE_EXCISION_REPAIR	1
		REACTOME_RECYCLING_OF_BILE_ACIDS_AND_SALTS	1
		REACTOME_SIGNALING_BY_RHO_GTPASES	1
		REACTOME_SIGNALING_BY_WNT	1
		REACTOME_METABOLISM_OF_NON_CODING_RNA	1
		REACTOME_SYNTHESIS_OF_BILE_ACIDS_AND_BILE_SALTS_VIA_24_HYDROXYCHOLESTEROL	1
		REACTOME_METABOLISM_OF_STEROID_HORMONES_AND_VITAMINS_A_AND_D	1
		REACTOME_ANDROGEN_BIOSYNTHESIS	1
		REACTOME_SIGNALLING_BY_NGF	1
		REACTOME_CTNNB1_PHOSPHORYLATION_CASCADE	1
		REACTOME_INSULIN_RECEPTOR_RECYCLING	1
		REACTOME_COPI_MEDIATED_TRANSPORT	1
		REACTOME_NEF_MEDIATED_DOWNREGULATION_OF_MHC_CLASS_I_COMPLEX_CELL_SURFACE_EXPRESSION	1
		REACTOME_SIGNALING_BY_SCF_KIT	1
		REACTOME_CROSS_PRESENTATION_OF_SOLUBLE_EXOGENOUS_ANTIGENS_ENDOSOMES	1
		REACTOME_SIGNALING_BY_NODAL	1
		REACTOME_DAG_AND_IP3_SIGNALING	1
		REACTOME_SPRY_REGULATION_OF_FGF_SIGNALING	1
		REACTOME_TCA_CYCLE_AND_RESPIRATORY_ELECTRON_TRANSPORT	1
		REACTOME_BMAL1_CLOCK_NPAS2_ACTIVATES_CIRCADIAN_EXPRESSION	1
		REACTOME_ANTIGEN_PROCESSING_CROSS_PRESENTATION	1
		REACTOME_GROWTH_HORMONE_RECEPTOR_SIGNALING	1
		REACTOME_TRIF_MEDIATED_TLR3_SIGNALING	1
		REACTOME_CELL_CELL_COMMUNICATION	1
		REACTOME_ABCA_TRANSPORTERS_IN_LIPID_HOMEOSTASIS	1
		REACTOME_ENDOSOMAL_VACUOLAR_PATHWAY	1
		REACTOME_TETRAHYDROBIOPTERIN_BH4_SYNTHESIS_RECYCLING_SALVAGE_AND_REGULATION	1
		REACTOME_ER_PHAGOSOME_PATHWAY	1
		REACTOME_MEIOSIS	1
		REACTOME_NEGATIVE_REGULATION_OF_FGFR_SIGNALING	1
		REACTOME_G0_AND_EARLY_G1	1
		REACTOME_REGULATION_OF_KIT_SIGNALING	1
		REACTOME_MEMBRANE_TRAFFICKING	1
		REACTOME_NEF_MEDIATES_DOWN_MODULATION_OF_CELL_SURFACE_RECEPTORS_BY_RECRUITING_THEM_TO_CLATHRIN_ADAPTERS	1
		REACTOME_IMMUNOREGULATORY_INTERACTIONS_BETWEEN_A_LYMPHOID_AND_A_NON_LYMPHOID_CELL	1
		REACTOME_ACTIVATED_AMPK_STIMULATES_FATTY_ACID_OXIDATION_IN_MUSCLE	1
		REACTOME_VITAMIN_B5_PANTOTHENATE_METABOLISM	1
		REACTOME_BOTULINUM_NEUROTOXICITY	1
		REACTOME_PROTEOLYTIC_CLEAVAGE_OF_SNARE_COMPLEX_PROTEINS	1
		REACTOME_RESOLUTION_OF_AP_SITES_VIA_THE_MULTIPLE_NUCLEOTIDE_PATCH_REPLACEMENT_PATHWAY	1
		REACTOME_GAMMA_CARBOXYLATION_TRANSPORT_AND_AMINO_TERMINAL_CLEAVAGE_OF_PROTEINS	1
		REACTOME_IL_7_SIGNALING	1
		REACTOME_CELL_CYCLE	1
		REACTOME_SIGNALING_BY_ERBB4	1
		REACTOME_ORC1_REMOVAL_FROM_CHROMATIN	1
		REACTOME_O_LINKED_GLYCOSYLATION_OF_MUCINS	1
		REACTOME_SULFUR_AMINO_ACID_METABOLISM	1
		REACTOME_DOWNREGULATION_OF_ERBB2_ERBB3_SIGNALING	1
		REACTOME_ANTIVIRAL_MECHANISM_BY_IFN_STIMULATED_GENES	1
		REACTOME_PROLACTIN_RECEPTOR_SIGNALING	1
		REACTOME_SIGNALING_BY_ERBB2	1
		REACTOME_SPHINGOLIPID_DE_NOVO_BIOSYNTHESIS	1
		REACTOME_TERMINATION_OF_O_GLYCAN_BIOSYNTHESIS	1
		REACTOME_DEFENSINS	1
		REACTOME_SIGNALING_BY_CONSTITUTIVELY_ACTIVE_EGFR	1
		REACTOME_GRB2_EVENTS_IN_ERBB2_SIGNALING	1
		REACTOME_SIGNALING_BY_EGFR_IN_CANCER	1
		REACTOME_MEMBRANE_BINDING_AND_TARGETTING_OF_GAG_PROTEINS	1
		REACTOME_BETA_DEFENSINS	1
		REACTOME_SRP_DEPENDENT_COTRANSLATIONAL_PROTEIN_TARGETING_TO_MEMBRANE	1
		REACTOME_PI3K_EVENTS_IN_ERBB4_SIGNALING	1
		REACTOME_SHC1_EVENTS_IN_ERBB4_SIGNALING	1
		REACTOME_PI3K_EVENTS_IN_ERBB2_SIGNALING	1
		REACTOME_NUCLEAR_SIGNALING_BY_ERBB4	1
		REACTOME_GLYCOSPHINGOLIPID_METABOLISM	1
		REACTOME_ASSOCIATION_OF_LICENSING_FACTORS_WITH_THE_PRE_REPLICATIVE_COMPLEX	1
		REACTOME_RIP_MEDIATED_NFKB_ACTIVATION_VIA_DAI	1
		REACTOME_PRE_NOTCH_TRANSCRIPTION_AND_TRANSLATION	1
		REACTOME_DEGRADATION_OF_THE_EXTRACELLULAR_MATRIX	1
		REACTOME_MITOCHONDRIAL_PROTEIN_IMPORT	1
		REACTOME_SIGNALING_BY_HIPPO	1
		REACTOME_ACTIVATED_NOTCH1_TRANSMITS_SIGNAL_TO_THE_NUCLEUS	1
		REACTOME_TRAFFICKING_AND_PROCESSING_OF_ENDOSOMAL_TLR	1
		REACTOME_SIGNALING_BY_NOTCH4	1
		REACTOME_ACTIVATION_OF_NF_KAPPAB_IN_B_CELLS	1
		REACTOME_RORA_ACTIVATES_CIRCADIAN_EXPRESSION	1
		REACTOME_ANTIGEN_ACTIVATES_B_CELL_RECEPTOR_LEADING_TO_GENERATION_OF_SECOND_MESSENGERS	1
		REACTOME_SIGNALING_BY_NOTCH2	1
		REACTOME_PRE_NOTCH_EXPRESSION_AND_PROCESSING	1
		REACTOME_NOTCH1_INTRACELLULAR_DOMAIN_REGULATES_TRANSCRIPTION	1
		REACTOME_CIRCADIAN_REPRESSION_OF_EXPRESSION_BY_REV_ERBA	1
		REACTOME_PRE_NOTCH_PROCESSING_IN_GOLGI	1
		REACTOME_SIGNALING_BY_NOTCH1	1
		REACTOME_SIGNALING_BY_NOTCH3	1
		REACTOME_INSULIN_RECEPTOR_SIGNALLING_CASCADE	1
		REACTOME_ARMS_MEDIATED_ACTIVATION	1
		REACTOME_PROLONGED_ERK_ACTIVATION_EVENTS	1
		REACTOME_SIGNALLING_TO_RAS	1
		REACTOME_SIGNALING_BY_BMP	1
		REACTOME_NGF_SIGNALLING_VIA_TRKA_FROM_THE_PLASMA_MEMBRANE	1
		REACTOME_SIGNALLING_TO_ERKS	1
		REACTOME_P38MAPK_EVENTS	1
		REACTOME_TGF_BETA_RECEPTOR_SIGNALING_IN_EMT_EPITHELIAL_TO_MESENCHYMAL_TRANSITION	1
		REACTOME_DOWNREGULATION_OF_TGF_BETA_RECEPTOR_SIGNALING	1
		REACTOME_SMAD2_SMAD3_SMAD4_HETEROTRIMER_REGULATES_TRANSCRIPTION	1
		REACTOME_SIGNALING_BY_FGFR_IN_DISEASE	1
		REACTOME_HS_GAG_DEGRADATION	1
		REACTOME_SYNTHESIS_OF_PIPS_AT_THE_EARLY_ENDOSOME_MEMBRANE	1
		REACTOME_SIGNALLING_TO_P38_VIA_RIT_AND_RIN	1
		REACTOME_P53_INDEPENDENT_G1_S_DNA_DAMAGE_CHECKPOINT	1
		REACTOME_REGULATION_OF_HYPOXIA_INDUCIBLE_FACTOR_HIF_BY_OXYGEN	1
		REACTOME_SYNTHESIS_OF_PIPS_AT_THE_GOLGI_MEMBRANE	1
		REACTOME_TGF_BETA_RECEPTOR_SIGNALING_ACTIVATES_SMADS	1
		REACTOME_ACTIVATED_POINT_MUTANTS_OF_FGFR2	1
		REACTOME_PHOSPHOLIPID_METABOLISM	1
		REACTOME_CS_DS_DEGRADATION	1
		REACTOME_OXYGEN_DEPENDENT_PROLINE_HYDROXYLATION_OF_HYPOXIA_INDUCIBLE_FACTOR_ALPHA	1
		REACTOME_SYNTHESIS_OF_PIPS_AT_THE_LATE_ENDOSOME_MEMBRANE	1
		REACTOME_SYNTHESIS_OF_PE	1
		REACTOME_GASTRIN_CREB_SIGNALLING_PATHWAY_VIA_PKC_AND_MAPK	1
		REACTOME_CHONDROITIN_SULFATE_BIOSYNTHESIS	1
		REACTOME_HYALURONAN_UPTAKE_AND_DEGRADATION	1
		REACTOME_SIGNALING_BY_FGFR1_MUTANTS	1
		REACTOME_SYNTHESIS_OF_PIPS_AT_THE_PLASMA_MEMBRANE	1
		REACTOME_THE_ACTIVATION_OF_ARYLSULFATASES	1
		REACTOME_TRANSCRIPTIONAL_ACTIVITY_OF_SMAD2_SMAD3_SMAD4_HETEROTRIMER	1
		REACTOME_HYALURONAN_METABOLISM	1
		REACTOME_DOWNREGULATION_OF_SMAD2_3_SMAD4_TRANSCRIPTIONAL_ACTIVITY	1
		REACTOME_KERATAN_SULFATE_BIOSYNTHESIS	1
		REACTOME_REVERSIBLE_HYDRATION_OF_CARBON_DIOXIDE	1
		REACTOME_SIGNALING_BY_FGFR1_FUSION_MUTANTS	1
		REACTOME_ALPHA_LINOLENIC_ACID_ALA_METABOLISM	1
		REACTOME_SIGNALING_BY_ACTIVATED_POINT_MUTANTS_OF_FGFR1	1
		REACTOME_PI_METABOLISM	1
		REACTOME_ABACAVIR_TRANSPORT_AND_METABOLISM	1
		REACTOME_CHONDROITIN_SULFATE_DERMATAN_SULFATE_METABOLISM	1
		REACTOME_LATENT_INFECTION_OF_HOMO_SAPIENS_WITH_MYCOBACTERIUM_TUBERCULOSIS	1
		REACTOME_SYNTHESIS_OF_PC	1
		REACTOME_HS_GAG_BIOSYNTHESIS	1
		REACTOME_SIGNALING_BY_FGFR3_MUTANTS	1
		REACTOME_KERATAN_SULFATE_KERATIN_METABOLISM	1
		REACTOME_APOPTOSIS_INDUCED_DNA_FRAGMENTATION	1
		REACTOME_KERATAN_SULFATE_DEGRADATION	1
		REACTOME_HEPARAN_SULFATE_HEPARIN_HS_GAG_METABOLISM	1
		REACTOME_GLYCOSAMINOGLYCAN_METABOLISM	1
		REACTOME_SIGNALING_BY_FGFR_MUTANTS	1
		REACTOME_MHC_CLASS_II_ANTIGEN_PRESENTATION	1
		REACTOME_A_TETRASACCHARIDE_LINKER_SEQUENCE_IS_REQUIRED_FOR_GAG_SYNTHESIS	1
		REACTOME_CDK_MEDIATED_PHOSPHORYLATION_AND_REMOVAL_OF_CDC6	1
		REACTOME_PLATELET_ADHESION_TO_EXPOSED_COLLAGEN	1
		REACTOME_VEGF_LIGAND_RECEPTOR_INTERACTIONS	1
		REACTOME_ENOS_ACTIVATION_AND_REGULATION	1
		REACTOME_MICRORNA_MIRNA_BIOGENESIS	1
		REACTOME_NUCLEAR_EVENTS_KINASE_AND_TRANSCRIPTION_FACTOR_ACTIVATION	1
		REACTOME_RETROGRADE_NEUROTROPHIN_SIGNALLING	1
		REACTOME_ERKS_ARE_INACTIVATED	1
		REACTOME_NEGATIVE_REGULATION_OF_THE_PI3K_AKT_NETWORK	1
		REACTOME_PI3K_AKT_ACTIVATION	1
		REACTOME_REGULATORY_RNA_PATHWAYS	1
		REACTOME_EGFR_DOWNREGULATION	1
		REACTOME_PROCESSING_OF_CAPPED_INTRON_CONTAINING_PRE_MRNA	1
		REACTOME_PECAM1_INTERACTIONS	1
		REACTOME_TCR_SIGNALING	1
		REACTOME_REGULATION_OF_PYRUVATE_DEHYDROGENASE_PDH_COMPLEX	1
		REACTOME_DOWNSTREAM_TCR_SIGNALING	1
		REACTOME_AKT_PHOSPHORYLATES_TARGETS_IN_THE_CYTOSOL	1
		REACTOME_GAB1_SIGNALOSOME	1
		REACTOME_SHC1_EVENTS_IN_EGFR_SIGNALING	1
		REACTOME_ACTIVATION_OF_THE_MRNA_UPON_BINDING_OF_THE_CAP_BINDING_COMPLEX_AND_EIFS_AND_SUBSEQUENT_BINDING_TO_43S	1
		REACTOME_PHOSPHORYLATION_OF_CD3_AND_TCR_ZETA_CHAINS	1
		REACTOME_TRANSLOCATION_OF_ZAP_70_TO_IMMUNOLOGICAL_SYNAPSE	1
		REACTOME_ERK_MAPK_TARGETS	1
		REACTOME_TIE2_SIGNALING	1
		REACTOME_GENERATION_OF_SECOND_MESSENGER_MOLECULES	1
		REACTOME_GENERIC_TRANSCRIPTION_PATHWAY	1
		REACTOME_RESPONSE_TO_ELEVATED_PLATELET_CYTOSOLIC_CA2_	1
		REACTOME_TRANSPORT_OF_MATURE_TRANSCRIPT_TO_CYTOPLASM	1
		REACTOME_METABOLISM_OF_AMINO_ACIDS_AND_DERIVATIVES	1
		REACTOME_RNA_POL_I_TRANSCRIPTION	1
		REACTOME_FATTY_ACYL_COA_BIOSYNTHESIS	1
		REACTOME_P75NTR_RECRUITS_SIGNALLING_COMPLEXES	1
		REACTOME_REGULATED_PROTEOLYSIS_OF_P75NTR	1
		REACTOME_TRANSMISSION_ACROSS_CHEMICAL_SYNAPSES	1
		REACTOME_P75NTR_SIGNALS_VIA_NFKB	1
		REACTOME_CASPASE_MEDIATED_CLEAVAGE_OF_CYTOSKELETAL_PROTEINS	1
		REACTOME_REGULATION_OF_ORNITHINE_DECARBOXYLASE_ODC	1
		REACTOME_BASE_FREE_SUGAR_PHOSPHATE_REMOVAL_VIA_THE_SINGLE_NUCLEOTIDE_REPLACEMENT_PATHWAY	1
		REACTOME_APOPTOTIC_CLEAVAGE_OF_CELL_ADHESION_PROTEINS	1
		REACTOME_HDL_MEDIATED_LIPID_TRANSPORT	1
		REACTOME_NRAGE_SIGNALS_DEATH_THROUGH_JNK	1
		REACTOME_SLBP_DEPENDENT_PROCESSING_OF_REPLICATION_DEPENDENT_HISTONE_PRE_MRNAS	1
		REACTOME_NRIF_SIGNALS_CELL_DEATH_FROM_THE_NUCLEUS	1
		REACTOME_REGULATION_OF_APOPTOSIS	1
		REACTOME_RNA_POL_II_TRANSCRIPTION	1
		REACTOME_NEURONAL_SYSTEM	1
		REACTOME_NFKB_IS_ACTIVATED_AND_SIGNALS_SURVIVAL	1
		REACTOME_REGULATION_OF_BETA_CELL_DEVELOPMENT	1
		REACTOME_RNA_POL_III_TRANSCRIPTION	1
		REACTOME_CELL_DEATH_SIGNALLING_VIA_NRAGE_NRIF_AND_NADE	1
		REACTOME_P75_NTR_RECEPTOR_MEDIATED_SIGNALLING	1
		REACTOME_AMINO_ACID_TRANSPORT_ACROSS_THE_PLASMA_MEMBRANE	1
		REACTOME_ENDOGENOUS_STEROLS	1
		REACTOME_REGULATION_OF_GENE_EXPRESSION_IN_BETA_CELLS	1
		REACTOME_GLYCOLYSIS	1
		REACTOME_PROCESSIVE_SYNTHESIS_ON_THE_LAGGING_STRAND	1
		REACTOME_PEPTIDE_CHAIN_ELONGATION	1
		REACTOME_COMMON_PATHWAY	1
		REACTOME_MRNA_CAPPING	1
		REACTOME_PEPTIDE_LIGAND_BINDING_RECEPTORS	1
		REACTOME_METABOLISM_OF_POLYAMINES	1
		REACTOME_NOTCH_HLH_TRANSCRIPTION_PATHWAY	1
		REACTOME_INTEGRATION_OF_ENERGY_METABOLISM	1
		REACTOME_CELL_CYCLE_MITOTIC	1
		REACTOME_GLUCONEOGENESIS	1
		REACTOME_DOPAMINE_NEUROTRANSMITTER_RELEASE_CYCLE	1
		REACTOME_OPIOID_SIGNALLING	1
		REACTOME_RECRUITMENT_OF_MITOTIC_CENTROSOME_PROTEINS_AND_COMPLEXES	1
		REACTOME_CYTOSOLIC_TRNA_AMINOACYLATION	1
		REACTOME_CA_DEPENDENT_EVENTS	1
		REACTOME_ACETYLCHOLINE_NEUROTRANSMITTER_RELEASE_CYCLE	1
		REACTOME_ADENYLATE_CYCLASE_ACTIVATING_PATHWAY	1
		REACTOME_ADENYLATE_CYCLASE_INHIBITORY_PATHWAY	1
		REACTOME_DARPP_32_EVENTS	1
		REACTOME_CHEMOKINE_RECEPTORS_BIND_CHEMOKINES	1
		REACTOME_LOSS_OF_NLP_FROM_MITOTIC_CENTROSOMES	1
		REACTOME_NEUROTRANSMITTER_RECEPTOR_BINDING_AND_DOWNSTREAM_TRANSMISSION_IN_THE_POSTSYNAPTIC_CELL	1
		REACTOME_CELL_CYCLE_CHECKPOINTS	1
		REACTOME_DIABETES_PATHWAYS	1
		REACTOME_P130CAS_LINKAGE_TO_MAPK_SIGNALING_FOR_INTEGRINS	1
		REACTOME_GLYCOPROTEIN_HORMONES	1
		REACTOME_NOREPINEPHRINE_NEUROTRANSMITTER_RELEASE_CYCLE	1
		REACTOME_PLC_BETA_MEDIATED_EVENTS	1
		REACTOME_REGULATION_OF_INSULIN_LIKE_GROWTH_FACTOR_IGF_ACTIVITY_BY_INSULIN_LIKE_GROWTH_FACTOR_BINDING_PROTEINS_IGFBPS	1
		REACTOME_GRB2_SOS_PROVIDES_LINKAGE_TO_MAPK_SIGNALING_FOR_INTERGRINS_	1
		REACTOME_PEPTIDE_HORMONE_BIOSYNTHESIS	1
		REACTOME_G_PROTEIN_ACTIVATION	1
		REACTOME_ACETYLCHOLINE_BINDING_AND_DOWNSTREAM_EVENTS	1
		REACTOME_ABC_FAMILY_PROTEINS_MEDIATED_TRANSPORT	1
		REACTOME_TRNA_AMINOACYLATION	1
		REACTOME_OLFACTORY_SIGNALING_PATHWAY	1
		REACTOME_STEROID_HORMONES	1
		REACTOME_PKA_MEDIATED_PHOSPHORYLATION_OF_CREB	1
		REACTOME_AMINE_DERIVED_HORMONES	1
		REACTOME_INTEGRIN_ALPHAIIB_BETA3_SIGNALING	1
		REACTOME_NUCLEAR_RECEPTOR_TRANSCRIPTION_PATHWAY	1
		REACTOME_INSULIN_SYNTHESIS_AND_PROCESSING	1
		REACTOME_CYCLIN_E_ASSOCIATED_EVENTS_DURING_G1_S_TRANSITION_	1
		REACTOME_HOMOLOGOUS_RECOMBINATION_REPAIR_OF_REPLICATION_INDEPENDENT_DOUBLE_STRAND_BREAKS	1
		REACTOME_G1_PHASE	1
		REACTOME_ELEVATION_OF_CYTOSOLIC_CA2_LEVELS	1
		REACTOME_P53_DEPENDENT_G1_DNA_DAMAGE_RESPONSE	1
		REACTOME_TRANSCRIPTION_COUPLED_NER_TC_NER	1
		REACTOME_RNA_POL_II_TRANSCRIPTION_PRE_INITIATION_AND_PROMOTER_OPENING	1
		REACTOME_GLUCAGON_SIGNALING_IN_METABOLIC_REGULATION	1
		REACTOME_MRNA_PROCESSING	1
		REACTOME_ASSOCIATION_OF_TRIC_CCT_WITH_TARGET_PROTEINS_DURING_BIOSYNTHESIS	1
		REACTOME_PREFOLDIN_MEDIATED_TRANSFER_OF_SUBSTRATE_TO_CCT_TRIC	1
		REACTOME_HORMONE_LIGAND_BINDING_RECEPTORS	1
		REACTOME_GPVI_MEDIATED_ACTIVATION_CASCADE	1
		REACTOME_PROTEIN_FOLDING	1
		REACTOME_FORMATION_OF_TUBULIN_FOLDING_INTERMEDIATES_BY_CCT_TRIC	1
		REACTOME_POST_CHAPERONIN_TUBULIN_FOLDING_PATHWAY	1
		REACTOME_STRIATED_MUSCLE_CONTRACTION	1
		REACTOME_METABOLISM_OF_NUCLEOTIDES	1
		REACTOME_AMINE_LIGAND_BINDING_RECEPTORS	1
		REACTOME_DOWNSTREAM_SIGNAL_TRANSDUCTION	1
		REACTOME_MUSCLE_CONTRACTION	1
		REACTOME_SEROTONIN_RECEPTORS	1
		REACTOME_CDC6_ASSOCIATION_WITH_THE_ORC_ORIGIN_COMPLEX	1
		REACTOME_M_G1_TRANSITION	1
		REACTOME_MRNA_SPLICING	1
		REACTOME_MRNA_SPLICING_MINOR_PATHWAY	1
		REACTOME_3_UTR_MEDIATED_TRANSLATIONAL_REGULATION	1
		REACTOME_PROCESSING_OF_CAPPED_INTRONLESS_PRE_MRNA	1
		REACTOME_PURINE_RIBONUCLEOSIDE_MONOPHOSPHATE_BIOSYNTHESIS	1
		REACTOME_G1_S_TRANSITION	1
		REACTOME_CITRIC_ACID_CYCLE_TCA_CYCLE	1
		REACTOME_TRANSCRIPTION	1
		REACTOME_POL_SWITCHING	1
		REACTOME_NUCLEOTIDE_EXCISION_REPAIR	1
		REACTOME_REGULATION_OF_THE_FANCONI_ANEMIA_PATHWAY	1
		REACTOME_AXON_GUIDANCE	1
		REACTOME_ACTIVATION_OF_CHAPERONE_GENES_BY_XBP1S	1
		REACTOME_REGULATION_OF_INSULIN_SECRETION_BY_GLUCAGON_LIKE_PEPTIDE1	1
		REACTOME_PERK_REGULATED_GENE_EXPRESSION	1
		REACTOME_G_ALPHA_Q_SIGNALLING_EVENTS	1
		REACTOME_P2Y_RECEPTORS	1
		REACTOME_TRAFFICKING_OF_AMPA_RECEPTORS	1
		REACTOME_CLASS_C_3_METABOTROPIC_GLUTAMATE_PHEROMONE_RECEPTORS	1
		REACTOME_REGULATION_OF_INSULIN_SECRETION	1
		REACTOME_INHIBITION_OF_INSULIN_SECRETION_BY_ADRENALINE_NORADRENALINE	1
		REACTOME_NUCLEOTIDE_LIKE_PURINERGIC_RECEPTORS	1
		REACTOME_ACTIVATION_OF_CHAPERONES_BY_ATF6_ALPHA	1
		REACTOME_TRANSPORT_OF_MATURE_MRNA_DERIVED_FROM_AN_INTRONLESS_TRANSCRIPT	1
		REACTOME_EICOSANOID_LIGAND_BINDING_RECEPTORS	1
		REACTOME_ACTIVATION_OF_GENES_BY_ATF4	1
		REACTOME_UNFOLDED_PROTEIN_RESPONSE	1
		REACTOME_CLASS_B_2_SECRETIN_FAMILY_RECEPTORS	1
		REACTOME_GLUCAGON_TYPE_LIGAND_RECEPTORS	1
		REACTOME_REGULATION_OF_INSULIN_SECRETION_BY_ACETYLCHOLINE	1
		REACTOME_G_ALPHA1213_SIGNALLING_EVENTS	1
		REACTOME_FANCONI_ANEMIA_PATHWAY	1
		REACTOME_TRAFFICKING_OF_GLUR2_CONTAINING_AMPA_RECEPTORS	1
		REACTOME_ACTIVATION_OF_CHAPERONE_GENES_BY_ATF6_ALPHA	1
		REACTOME_PROSTANOID_LIGAND_RECEPTORS	1
		REACTOME_OPSINS	1
		REACTOME_FORMATION_OF_RNA_POL_II_ELONGATION_COMPLEX_	1
		REACTOME_MRNA_3_END_PROCESSING	1
		REACTOME_POST_TRANSLATIONAL_MODIFICATION_SYNTHESIS_OF_GPI_ANCHORED_PROTEINS	1
		REACTOME_ELONGATION_ARREST_AND_RECOVERY	1
		REACTOME_SLC_MEDIATED_TRANSMEMBRANE_TRANSPORT	1
		REACTOME_ADP_SIGNALLING_THROUGH_P2RY1	1
		REACTOME_G_BETA_GAMMA_SIGNALLING_THROUGH_PLC_BETA	1
		REACTOME_CD28_CO_STIMULATION	1
		REACTOME_SYNTHESIS_SECRETION_AND_DEACYLATION_OF_GHRELIN	1
		REACTOME_ADHERENS_JUNCTIONS_INTERACTIONS	1
		REACTOME_CRMPS_IN_SEMA3A_SIGNALING	1
		REACTOME_OTHER_SEMAPHORIN_INTERACTIONS	1
		REACTOME_ACTIVATION_OF_RAC	1
		REACTOME_PURINE_SALVAGE	1
		REACTOME_G_ALPHA_I_SIGNALLING_EVENTS	1
		REACTOME_SEMA3A_PAK_DEPENDENT_AXON_REPULSION	1
		REACTOME_CD28_DEPENDENT_VAV1_PATHWAY	1
		REACTOME_SEMA4D_IN_SEMAPHORIN_SIGNALING	1
		REACTOME_SEMAPHORIN_INTERACTIONS	1
		REACTOME_SEMA4D_INDUCED_CELL_MIGRATION_AND_GROWTH_CONE_COLLAPSE	1
		REACTOME_SEMA3A_PLEXIN_REPULSION_SIGNALING_BY_INHIBITING_INTEGRIN_ADHESION	1
		REACTOME_LYSOSOME_VESICLE_BIOGENESIS	1
		REACTOME_G_BETA_GAMMA_SIGNALLING_THROUGH_PI3KGAMMA	1
		REACTOME_TRANSPORT_OF_GLUCOSE_AND_OTHER_SUGARS_BILE_SALTS_AND_ORGANIC_ACIDS_METAL_IONS_AND_AMINE_COMPOUNDS	1
		REACTOME_SPHINGOLIPID_METABOLISM	1
		REACTOME_PD1_SIGNALING	1
		REACTOME_G_ALPHA_S_SIGNALLING_EVENTS	1
		REACTOME_CELL_CELL_JUNCTION_ORGANIZATION	1
		REACTOME_G_ALPHA_Z_SIGNALLING_EVENTS	1
		REACTOME_FACILITATIVE_NA_INDEPENDENT_GLUCOSE_TRANSPORTERS	1
		REACTOME_COSTIMULATION_BY_THE_CD28_FAMILY	1
		REACTOME_SIGNALING_BY_ROBO_RECEPTOR	1
		REACTOME_CD28_DEPENDENT_PI3K_AKT_SIGNALING	1
		REACTOME_TIGHT_JUNCTION_INTERACTIONS	1
		REACTOME_G_PROTEIN_BETA_GAMMA_SIGNALLING	1
		REACTOME_TRANSPORT_OF_INORGANIC_CATIONS_ANIONS_AND_AMINO_ACIDS_OLIGOPEPTIDES	1
		REACTOME_CTLA4_INHIBITORY_SIGNALING	1
		REACTOME_FORMATION_OF_TRANSCRIPTION_COUPLED_NER_TC_NER_REPAIR_COMPLEX	1
		REACTOME_AMINO_ACID_AND_OLIGOPEPTIDE_SLC_TRANSPORTERS	1
		REACTOME_CDT1_ASSOCIATION_WITH_THE_CDC6_ORC_ORIGIN_COMPLEX	1
		REACTOME_BRANCHED_CHAIN_AMINO_ACID_CATABOLISM	1
		REACTOME_REPAIR_SYNTHESIS_FOR_GAP_FILLING_BY_DNA_POL_IN_TC_NER	1
		REACTOME_RECEPTOR_LIGAND_BINDING_INITIATES_THE_SECOND_PROTEOLYTIC_CLEAVAGE_OF_NOTCH_RECEPTOR	1
		REACTOME_NA_CL_DEPENDENT_NEUROTRANSMITTER_TRANSPORTERS	1
		REACTOME_FORMATION_OF_FIBRIN_CLOT_CLOTTING_CASCADE	1
		REACTOME_DEADENYLATION_OF_MRNA	1
		REACTOME_MRNA_DECAY_BY_5_TO_3_EXORIBONUCLEASE	1
		REACTOME_SIGNAL_AMPLIFICATION	1
		REACTOME_ZINC_TRANSPORTERS	1
		REACTOME_DOUBLE_STRAND_BREAK_REPAIR	1
		REACTOME_RAS_ACTIVATION_UOPN_CA2_INFUX_THROUGH_NMDA_RECEPTOR	1
		REACTOME_METAL_ION_SLC_TRANSPORTERS	1
		REACTOME_AUTODEGRADATION_OF_THE_E3_UBIQUITIN_LIGASE_COP1	1
		REACTOME_SMOOTH_MUSCLE_CONTRACTION	1
		REACTOME_ACTIVATION_OF_NMDA_RECEPTOR_UPON_GLUTAMATE_BINDING_AND_POSTSYNAPTIC_EVENTS	1
		REACTOME_CREB_PHOSPHORYLATION_THROUGH_THE_ACTIVATION_OF_RAS	1
		REACTOME_POST_NMDA_RECEPTOR_ACTIVATION_EVENTS	1
		REACTOME_UNBLOCKING_OF_NMDA_RECEPTOR_GLUTAMATE_BINDING_AND_ACTIVATION	1
		REACTOME_MRNA_DECAY_BY_3_TO_5_EXORIBONUCLEASE	1
		REACTOME_BILE_SALT_AND_ORGANIC_ANION_SLC_TRANSPORTERS	1
		REACTOME_DEADENYLATION_DEPENDENT_MRNA_DECAY	1
		REACTOME_CREB_PHOSPHORYLATION_THROUGH_THE_ACTIVATION_OF_CAMKII	1
		REACTOME_THROMBOXANE_SIGNALLING_THROUGH_TP_RECEPTOR	1
		REACTOME_CELL_EXTRACELLULAR_MATRIX_INTERACTIONS	1
		REACTOME_ADP_SIGNALLING_THROUGH_P2RY12	1
		REACTOME_AMINE_COMPOUND_SLC_TRANSPORTERS	1
		REACTOME_PYRUVATE_METABOLISM	1
		REACTOME_PURINE_CATABOLISM	1
		REACTOME_GLUCOSE_TRANSPORT	1
		REACTOME_FRS2_MEDIATED_CASCADE	1
		REACTOME_MITOTIC_G1_G1_S_PHASES	1
		REACTOME_PI_3K_CASCADE	1
		REACTOME_DOWNSTREAM_SIGNALING_OF_ACTIVATED_FGFR	1
		REACTOME_REGULATION_OF_MITOTIC_CELL_CYCLE	1
		REACTOME_TAK1_ACTIVATES_NFKB_BY_PHOSPHORYLATION_AND_ACTIVATION_OF_IKKS_COMPLEX	1
		REACTOME_REGULATION_OF_AMPK_ACTIVITY_VIA_LKB1	1
		REACTOME_MITOTIC_M_M_G1_PHASES	1
		REACTOME_MYOGENESIS	1
		REACTOME_MAP_KINASE_ACTIVATION_IN_TLR_CASCADE	1
		REACTOME_PHOSPHOLIPASE_C_MEDIATED_CASCADE	1
		REACTOME_ACTIVATION_OF_KAINATE_RECEPTORS_UPON_GLUTAMATE_BINDING	1
		REACTOME_IONOTROPIC_ACTIVITY_OF_KAINATE_RECEPTORS	1
		REACTOME_ACTIVATION_OF_THE_AP1_FAMILY_OF_TRANSCRIPTION_FACTORS	1
		REACTOME_MAPK_TARGETS_NUCLEAR_EVENTS_MEDIATED_BY_MAP_KINASES	1
		REACTOME_SYNTHESIS_AND_INTERCONVERSION_OF_NUCLEOTIDE_DI_AND_TRIPHOSPHATES	1
		REACTOME_GPCR_LIGAND_BINDING	1
		REACTOME_RNA_POL_I_RNA_POL_III_AND_MITOCHONDRIAL_TRANSCRIPTION	1
		REACTOME_JNK_C_JUN_KINASES_PHOSPHORYLATION_AND_ACTIVATION_MEDIATED_BY_ACTIVATED_HUMAN_TAK1	1
		REACTOME_SHC_MEDIATED_CASCADE	1
		REACTOME_THROMBIN_SIGNALLING_THROUGH_PROTEINASE_ACTIVATED_RECEPTORS_PARS	1
		REACTOME_ENERGY_DEPENDENT_REGULATION_OF_MTOR_BY_LKB1_AMPK	1
		REACTOME_MITOTIC_G2_G2_M_PHASES	1
		REACTOME_REGULATION_OF_RHEB_GTPASE_ACTIVITY_BY_AMPK	1
		REACTOME_ACTIVATED_TAK1_MEDIATES_P38_MAPK_ACTIVATION	1
		REACTOME_DNA_REPAIR	1
		REACTOME_EFFECTS_OF_PIP2_HYDROLYSIS	1
		REACTOME_RNA_POL_II_PRE_TRANSCRIPTION_EVENTS	1
		REACTOME_ROLE_OF_DCC_IN_REGULATING_APOPTOSIS	1
		REACTOME_POST_TRANSLATIONAL_PROTEIN_MODIFICATION	1
		REACTOME_CHROMOSOME_MAINTENANCE	1
		REACTOME_DEPOSITION_OF_NEW_CENPA_CONTAINING_NUCLEOSOMES_AT_THE_CENTROMERE	1
		REACTOME_L1CAM_INTERACTIONS	1
		REACTOME_ROLE_OF_SECOND_MESSENGERS_IN_NETRIN1_SIGNALING	1
		REACTOME_SIGNALING_BY_ILS	1
		REACTOME_NETRIN1_SIGNALING	1
		REACTOME_INTERACTION_BETWEEN_L1_AND_ANKYRINS	1
		REACTOME_SIGNAL_TRANSDUCTION_BY_L1	1
		REACTOME_TRANSPORT_OF_VITAMINS_NUCLEOSIDES_AND_RELATED_MOLECULES	1
		REACTOME_HIGHLY_CALCIUM_PERMEABLE_POSTSYNAPTIC_NICOTINIC_ACETYLCHOLINE_RECEPTORS	1
		REACTOME_RNA_POL_I_PROMOTER_OPENING	1
		REACTOME_PRESYNAPTIC_NICOTINIC_ACETYLCHOLINE_RECEPTORS	1
		REACTOME_ORGANIC_CATION_ANION_ZWITTERION_TRANSPORT	1
		REACTOME_DCC_MEDIATED_ATTRACTIVE_SIGNALING	1
		REACTOME_RECYCLING_PATHWAY_OF_L1	1
		REACTOME_SYNTHESIS_OF_SUBSTRATES_IN_N_GLYCAN_BIOSYTHESIS	1
		REACTOME_RESPIRATORY_ELECTRON_TRANSPORT	1
		REACTOME_ASPARAGINE_N_LINKED_GLYCOSYLATION	1
		REACTOME_ASSEMBLY_OF_THE_PRE_REPLICATIVE_COMPLEX	1
		REACTOME_BIOSYNTHESIS_OF_THE_N_GLYCAN_PRECURSOR_DOLICHOL_LIPID_LINKED_OLIGOSACCHARIDE_LLO_AND_TRANSFER_TO_A_NASCENT_PROTEIN	1
		REACTOME_IL1_SIGNALING	1
		REACTOME_GLOBAL_GENOMIC_NER_GG_NER	1
		REACTOME_CGMP_EFFECTS	1
		REACTOME_REGULATION_OF_SIGNALING_BY_CBL	1
		REACTOME_CALNEXIN_CALRETICULIN_CYCLE	1
		REACTOME_SYNTHESIS_SECRETION_AND_INACTIVATION_OF_GIP	1
		REACTOME_NEPHRIN_INTERACTIONS	1
		REACTOME_IL_3_5_AND_GM_CSF_SIGNALING	1
		REACTOME_NITRIC_OXIDE_STIMULATES_GUANYLATE_CYCLASE	1
		REACTOME_PLATELET_HOMEOSTASIS	1
		REACTOME_N_GLYCAN_TRIMMING_IN_THE_ER_AND_CALNEXIN_CALRETICULIN_CYCLE	1
		REACTOME_PLATELET_SENSITIZATION_BY_LDL	1
		REACTOME_IL_RECEPTOR_SHC_SIGNALING	1
		REACTOME_RAP1_SIGNALLING	1
		REACTOME_PLATELET_CALCIUM_HOMEOSTASIS	1
		REACTOME_SIGNAL_REGULATORY_PROTEIN_SIRP_FAMILY_INTERACTIONS	1
		REACTOME_PROSTACYCLIN_SIGNALLING_THROUGH_PROSTACYCLIN_RECEPTOR	1
		REACTOME_GABA_SYNTHESIS_RELEASE_REUPTAKE_AND_DEGRADATION	1
		REACTOME_INCRETIN_SYNTHESIS_SECRETION_AND_INACTIVATION	1
		REACTOME_SYNTHESIS_SECRETION_AND_INACTIVATION_OF_GLP1	1
		REACTOME_DESTABILIZATION_OF_MRNA_BY_BRF1	1
		REACTOME_IRAK1_RECRUITS_IKK_COMPLEX	1
		REACTOME_TRAF6_MEDIATED_IRF7_ACTIVATION	1
		REACTOME_CIRCADIAN_CLOCK	1
		REACTOME_TRAF6_MEDIATED_NFKB_ACTIVATION	1
		REACTOME_FACTORS_INVOLVED_IN_MEGAKARYOCYTE_DEVELOPMENT_AND_PLATELET_PRODUCTION	1
		REACTOME_GABA_A_RECEPTOR_ACTIVATION	1
		REACTOME_REGULATION_OF_MRNA_STABILITY_BY_PROTEINS_THAT_BIND_AU_RICH_ELEMENTS	1
		REACTOME_INHIBITION_OF_VOLTAGE_GATED_CA2_CHANNELS_VIA_GBETA_GAMMA_SUBUNITS	1
		REACTOME_IRAK2_MEDIATED_ACTIVATION_OF_TAK1_COMPLEX_UPON_TLR7_8_OR_9_STIMULATION	1
		REACTOME_TRAF6_MEDIATED_INDUCTION_OF_NFKB_AND_MAP_KINASES_UPON_TLR7_8_OR_9_ACTIVATION	1
		REACTOME_TRAF3_DEPENDENT_IRF_ACTIVATION_PATHWAY	1
		REACTOME_GABA_B_RECEPTOR_ACTIVATION	1
		REACTOME_NFKB_ACTIVATION_THROUGH_FADD_RIP1_PATHWAY_MEDIATED_BY_CASPASE_8_AND10	1
		REACTOME_DESTABILIZATION_OF_MRNA_BY_KSRP	1
		REACTOME_TRANSPORT_TO_THE_GOLGI_AND_SUBSEQUENT_MODIFICATION	1
		REACTOME_IRON_UPTAKE_AND_TRANSPORT	1
		REACTOME_DESTABILIZATION_OF_MRNA_BY_TRISTETRAPROLIN_TTP	1
		REACTOME_INTERFERON_GAMMA_SIGNALING	1
		REACTOME_N_GLYCAN_ANTENNAE_ELONGATION	1
		REACTOME_TRAF6_MEDIATED_IRF7_ACTIVATION_IN_TLR7_8_OR_9_SIGNALING	1
		REACTOME_ACTIVATION_OF_IRF3_IRF7_MEDIATED_BY_TBK1_IKK_EPSILON	1
		REACTOME_INTERFERON_ALPHA_BETA_SIGNALING	1
		REACTOME_ADVANCED_GLYCOSYLATION_ENDPRODUCT_RECEPTOR_SIGNALING	1
		REACTOME_GABA_RECEPTOR_ACTIVATION	1
		REACTOME_KINESINS	1
		REACTOME_N_GLYCAN_ANTENNAE_ELONGATION_IN_THE_MEDIAL_TRANS_GOLGI	1
		REACTOME_REGULATION_OF_IFNA_SIGNALING	1
		REACTOME_INTERFERON_SIGNALING	1
		REACTOME_NEGATIVE_REGULATORS_OF_RIG_I_MDA5_SIGNALING	1
		REACTOME_NFKB_AND_MAP_KINASES_ACTIVATION_MEDIATED_BY_TLR4_SIGNALING_REPERTOIRE	1
		REACTOME_TRANSFERRIN_ENDOCYTOSIS_AND_RECYCLING	1
		REACTOME_DSCAM_INTERACTIONS	1
		REACTOME_DESTABILIZATION_OF_MRNA_BY_AUF1_HNRNP_D0	1
		REACTOME_TRAF6_MEDIATED_INDUCTION_OF_TAK1_COMPLEX	1
		REACTOME_RIG_I_MDA5_MEDIATED_INDUCTION_OF_IFN_ALPHA_BETA_PATHWAYS	1
		REACTOME_IKK_COMPLEX_RECRUITMENT_MEDIATED_BY_RIP1	1
		REACTOME_LIGAND_GATED_ION_CHANNEL_TRANSPORT	1
		REACTOME_FORMATION_OF_INCISION_COMPLEX_IN_GG_NER	1
		REACTOME_ENDOSOMAL_SORTING_COMPLEX_REQUIRED_FOR_TRANSPORT_ESCRT	1
		REACTOME_MEIOTIC_RECOMBINATION	1
		REACTOME_IL_2_SIGNALING	1
		REACTOME_IL_6_SIGNALING	1
		REACTOME_PLATELET_AGGREGATION_PLUG_FORMATION	1
		REACTOME_SIGNALING_BY_NOTCH	1
		REACTOME_LAGGING_STRAND_SYNTHESIS	1
		REACTOME_INTRINSIC_PATHWAY	1
		REACTOME_INHIBITION_OF_REPLICATION_INITIATION_OF_DAMAGED_DNA_BY_RB1_E2F1	1
		REACTOME_SYNTHESIS_OF_VERY_LONG_CHAIN_FATTY_ACYL_COAS	1
		REACTOME_DNA_REPLICATION	1
		REACTOME_CLEAVAGE_OF_GROWING_TRANSCRIPT_IN_THE_TERMINATION_REGION_	1
		REACTOME_PKB_MEDIATED_EVENTS	1
		REACTOME_E2F_MEDIATED_REGULATION_OF_DNA_REPLICATION	1
		REACTOME_METABOLISM_OF_CARBOHYDRATES	1
		REACTOME_HORMONE_SENSITIVE_LIPASE_HSL_MEDIATED_TRIACYLGLYCEROL_HYDROLYSIS	1
		REACTOME_SIGNALING_BY_INSULIN_RECEPTOR	1
		REACTOME_SIGNAL_ATTENUATION	1
		REACTOME_PURINE_METABOLISM	1
		REACTOME_SOS_MEDIATED_SIGNALLING	1
		REACTOME_RNA_POL_III_TRANSCRIPTION_INITIATION_FROM_TYPE_3_PROMOTER	1
		REACTOME_LIPID_DIGESTION_MOBILIZATION_AND_TRANSPORT	1
		REACTOME_HEMOSTASIS	1
		REACTOME_INFLUENZA_VIRAL_RNA_TRANSCRIPTION_AND_REPLICATION	1
		REACTOME_NEP_NS2_INTERACTS_WITH_THE_CELLULAR_EXPORT_MACHINERY	1
		REACTOME_TRANSPORT_OF_RIBONUCLEOPROTEINS_INTO_THE_HOST_NUCLEUS	1
		REACTOME_ABORTIVE_ELONGATION_OF_HIV1_TRANSCRIPT_IN_THE_ABSENCE_OF_TAT	1
		REACTOME_EARLY_PHASE_OF_HIV_LIFE_CYCLE	1
		REACTOME_HOST_INTERACTIONS_OF_HIV_FACTORS	1
		REACTOME_RNA_POL_III_TRANSCRIPTION_TERMINATION	1
		REACTOME_RESPIRATORY_ELECTRON_TRANSPORT_ATP_SYNTHESIS_BY_CHEMIOSMOTIC_COUPLING_AND_HEAT_PRODUCTION_BY_UNCOUPLING_PROTEINS_	1
		REACTOME_FORMATION_OF_THE_HIV1_EARLY_ELONGATION_COMPLEX	1
		REACTOME_RAF_MAP_KINASE_CASCADE	1
		REACTOME_VIRAL_MESSENGER_RNA_SYNTHESIS	1
		REACTOME_SHC_MEDIATED_SIGNALLING	1
		REACTOME_INTERACTIONS_OF_VPR_WITH_HOST_CELLULAR_PROTEINS	1
		REACTOME_FORMATION_OF_ATP_BY_CHEMIOSMOTIC_COUPLING	1
		REACTOME_APC_C_CDH1_MEDIATED_DEGRADATION_OF_CDC20_AND_OTHER_APC_C_CDH1_TARGETED_PROTEINS_IN_LATE_MITOSIS_EARLY_G1	1
		REACTOME_ACTIVATION_OF_ATR_IN_RESPONSE_TO_REPLICATION_STRESS	1
		REACTOME_UNWINDING_OF_DNA	1
		REACTOME_APC_C_CDC20_MEDIATED_DEGRADATION_OF_MITOTIC_PROTEINS	1
		REACTOME_GLUCURONIDATION	1
		REACTOME_AUTODEGRADATION_OF_CDH1_BY_CDH1_APC_C	1
		REACTOME_MYD88_MAL_CASCADE_INITIATED_ON_PLASMA_MEMBRANE	1
		REACTOME_INNATE_IMMUNE_SYSTEM	1
		REACTOME_REGULATION_OF_GLUCOKINASE_BY_GLUCOKINASE_REGULATORY_PROTEIN	1
		REACTOME_MITOTIC_PROMETAPHASE	1
		REACTOME_SCF_BETA_TRCP_MEDIATED_DEGRADATION_OF_EMI1	1
		REACTOME_LIPOPROTEIN_METABOLISM	1
		REACTOME_G1_S_SPECIFIC_TRANSCRIPTION	1
		REACTOME_THE_ROLE_OF_NEF_IN_HIV1_REPLICATION_AND_DISEASE_PATHOGENESIS	1
		REACTOME_CHYLOMICRON_MEDIATED_LIPID_TRANSPORT	1
		REACTOME_SIGNALING_BY_TGF_BETA_RECEPTOR_COMPLEX	1
		REACTOME_CONVERSION_FROM_APC_C_CDC20_TO_APC_C_CDH1_IN_LATE_ANAPHASE	1
		REACTOME_ACTIVATED_TLR4_SIGNALLING	1
		REACTOME_BINDING_AND_ENTRY_OF_HIV_VIRION	1
		REACTOME_INTEGRATION_OF_PROVIRUS	1
		REACTOME_MTORC1_MEDIATED_SIGNALLING	1
		REACTOME_TOLL_RECEPTOR_CASCADES	1
		REACTOME_ACTIVATION_OF_BH3_ONLY_PROTEINS	1
		REACTOME_GLUCOSE_METABOLISM	1
		REACTOME_RNA_POL_III_CHAIN_ELONGATION	1
		REACTOME_VOLTAGE_GATED_POTASSIUM_CHANNELS	1
		REACTOME_NOD1_2_SIGNALING_PATHWAY	1
		REACTOME_MEIOTIC_SYNAPSIS	1
		REACTOME_ANTIGEN_PRESENTATION_FOLDING_ASSEMBLY_AND_PEPTIDE_LOADING_OF_CLASS_I_MHC	1
		REACTOME_THE_NLRP3_INFLAMMASOME	1
		REACTOME_CLASS_I_MHC_MEDIATED_ANTIGEN_PROCESSING_PRESENTATION	1
		REACTOME_NONSENSE_MEDIATED_DECAY_ENHANCED_BY_THE_EXON_JUNCTION_COMPLEX	1
		REACTOME_PIP3_ACTIVATES_AKT_SIGNALING	1
		REACTOME_TANDEM_PORE_DOMAIN_POTASSIUM_CHANNELS	1
		REACTOME_INFLAMMASOMES	1
		REACTOME_POTASSIUM_CHANNELS	1
		REACTOME_NUCLEOTIDE_BINDING_DOMAIN_LEUCINE_RICH_REPEAT_CONTAINING_RECEPTOR_NLR_SIGNALING_PATHWAYS	1
		REACTOME_INWARDLY_RECTIFYING_K_CHANNELS	1
		REACTOME_AMYLOIDS	1
		REACTOME_PACKAGING_OF_TELOMERE_ENDS	1
		REACTOME_TELOMERE_MAINTENANCE	1
		REACTOME_PLATELET_ACTIVATION_SIGNALING_AND_AGGREGATION	1
		REACTOME_REMOVAL_OF_THE_FLAP_INTERMEDIATE_FROM_THE_C_STRAND	1
		REACTOME_CREATION_OF_C4_AND_C2_ACTIVATORS	1
		REACTOME_APC_CDC20_MEDIATED_DEGRADATION_OF_NEK2A	1
		REACTOME_INITIAL_TRIGGERING_OF_COMPLEMENT	1
		REACTOME_EXTENSION_OF_TELOMERES	1
		REACTOME_G2_M_CHECKPOINTS	1
		REACTOME_S_PHASE	1
		REACTOME_SCFSKP2_MEDIATED_DEGRADATION_OF_P27_P21	1
		REACTOME_TRYPTOPHAN_CATABOLISM	1
		REACTOME_DNA_STRAND_ELONGATION	1
		REACTOME_RESOLUTION_OF_AP_SITES_VIA_THE_SINGLE_NUCLEOTIDE_REPLACEMENT_PATHWAY	1
		REACTOME_FGFR_LIGAND_BINDING_AND_ACTIVATION	1
		REACTOME_APOBEC3G_MEDIATED_RESISTANCE_TO_HIV1_INFECTION	1
		REACTOME_GAP_JUNCTION_TRAFFICKING	1
		REACTOME_FGFR2C_LIGAND_BINDING_AND_ACTIVATION	1
		REACTOME_METABOLISM_OF_PORPHYRINS	1
		REACTOME_FGFR4_LIGAND_BINDING_AND_ACTIVATION	1
		REACTOME_VIF_MEDIATED_DEGRADATION_OF_APOBEC3G	1
		REACTOME_SIGNALING_BY_FGFR	1
		REACTOME_DIGESTION_OF_DIETARY_CARBOHYDRATE	1
		REACTOME_FGFR1_LIGAND_BINDING_AND_ACTIVATION	1
		REACTOME_GAP_JUNCTION_ASSEMBLY	1
		REACTOME_SYNTHESIS_OF_GLYCOSYLPHOSPHATIDYLINOSITOL_GPI	1
		REACTOME_RNA_POL_I_TRANSCRIPTION_INITIATION	1
		REACTOME_PYRIMIDINE_METABOLISM	1
		REACTOME_INTRINSIC_PATHWAY_FOR_APOPTOSIS	1
		REACTOME_PI3K_CASCADE	1
		REACTOME_APOPTOTIC_EXECUTION_PHASE	1
		REACTOME_SHC_RELATED_EVENTS	1
		NABA_ECM_AFFILIATED	1
		NABA_PROTEOGLYCANS	1
		NABA_SECRETED_FACTORS	1

## Sheet: Supplementary Table 4
Genes differentially expressed by ATII cells exposed to MSCs
Entrez gene	Gene symbol	Description	Mean expression CytoMix	Mean expression CytoMix and MSCs	Log fold change	Fold change	P-value unadjusted	P-value adjusted
5270	SERPINE2	serpin family E member 2 [Source:HGNC Symbol;Acc:HGNC:8951]	5.53	9.87	4.34	20.3	0.0041	0.0224
4319	MMP10	matrix metallopeptidase 10 [Source:HGNC Symbol;Acc:HGNC:7156]	5.55	9.86	4.31	19.8	0.000993	0.0098
10631	POSTN	periostin [Source:HGNC Symbol;Acc:HGNC:16953]	3.79	7.93	4.14	17.6	0.0109	0.0401
7045	TGFBI	transforming growth factor beta induced [Source:HGNC Symbol;Acc:HGNC:11771]	6.54	10.2	3.64	12.4	0.000257	0.00475
1649	DDIT3	DNA damage inducible transcript 3 [Source:HGNC Symbol;Acc:HGNC:2726]	6.97	9.97	3.01	8.04	2.66e-08	0.000163
1490	CTGF	connective tissue growth factor [Source:HGNC Symbol;Acc:HGNC:2500]	5.31	8.18	2.87	7.32	0.00351	0.0205
4616	GADD45B	growth arrest and DNA damage inducible beta [Source:HGNC Symbol;Acc:HGNC:4096]	6.87	9.6	2.73	6.63	9.49e-07	0.000298
8900	CCNA1	cyclin A1 [Source:HGNC Symbol;Acc:HGNC:1577]	4.27	6.92	2.64	6.25	0.00157	0.013
6439	SFTPB	surfactant protein B [Source:HGNC Symbol;Acc:HGNC:10801]	8.69	11.3	2.64	6.25	0.00105	0.0102
5017	OVOL1	ovo like transcriptional repressor 1 [Source:HGNC Symbol;Acc:HGNC:8525]	4.45	7.07	2.62	6.17	0.00123	0.0112
1410	CRYAB	crystallin alpha B [Source:HGNC Symbol;Acc:HGNC:2389]	5.84	8.41	2.57	5.96	0.000527	0.00688
51129	ANGPTL4	angiopoietin like 4 [Source:HGNC Symbol;Acc:HGNC:16039]	5.93	8.51	2.57	5.95	8e-05	0.00252
1195	CLK1	CDC like kinase 1 [Source:HGNC Symbol;Acc:HGNC:2068]	6.38	8.89	2.51	5.7	2.41e-05	0.00135
4015	LOX	lysyl oxidase [Source:HGNC Symbol;Acc:HGNC:6664]	7.83	10.3	2.51	5.7	0.00199	0.0149
8351	NA	NA	4.13	6.63	2.51	5.68	0.00237	0.0164
4504	MT3	metallothionein 3 [Source:HGNC Symbol;Acc:HGNC:7408]	5.88	8.32	2.45	5.45	0.0015	0.0126
283	ANG	angiogenin [Source:HGNC Symbol;Acc:HGNC:483]	6.84	9.23	2.39	5.25	3.26e-06	0.000525
107984659	NA	NA	6.48	8.83	2.36	5.12	4.23e-07	0.000247
1510	CTSE	cathepsin E [Source:HGNC Symbol;Acc:HGNC:2530]	8.22	10.6	2.34	5.06	0.00556	0.0269
5225	PGC	progastricsin [Source:HGNC Symbol;Acc:HGNC:8890]	6.24	8.54	2.3	4.93	0.000499	0.00669
3434	IFIT1	interferon induced protein with tetratricopeptide repeats 1 [Source:HGNC Symbol;Acc:HGNC:5407]	7.35	9.64	2.3	4.91	0.000309	0.0052
1028	CDKN1C	cyclin dependent kinase inhibitor 1C [Source:HGNC Symbol;Acc:HGNC:1786]	6.54	8.84	2.29	4.9	3.61e-05	0.00159
3310	HSPA6	heat shock protein family A (Hsp70) member 6 [Source:HGNC Symbol;Acc:HGNC:5239]	5.76	8.05	2.29	4.9	0.000519	0.00683
6515	SLC2A3	solute carrier family 2 member 3 [Source:HGNC Symbol;Acc:HGNC:11007]	7.62	9.91	2.29	4.9	0.00359	0.0207
5806	PTX3	pentraxin 3 [Source:HGNC Symbol;Acc:HGNC:9692]	5.71	7.99	2.29	4.87	0.00567	0.0272
3280	HES1	hes family bHLH transcription factor 1 [Source:HGNC Symbol;Acc:HGNC:5192]	5.88	8.15	2.27	4.82	0.000381	0.00585
2353	FOS	Fos proto-oncogene, AP-1 transcription factor subunit [Source:HGNC Symbol;Acc:HGNC:3796]	4.46	6.71	2.25	4.77	0.000616	0.00748
3006	HIST1H1C	histone cluster 1 H1 family member c [Source:HGNC Symbol;Acc:HGNC:4716]	7.94	10.2	2.25	4.75	1.15e-05	0.000926
5376	PMP22	peripheral myelin protein 22 [Source:HGNC Symbol;Acc:HGNC:9118]	6.7	8.94	2.24	4.71	0.00228	0.016
57018	CCNL1	cyclin L1 [Source:HGNC Symbol;Acc:HGNC:20569]	7.71	9.93	2.23	4.68	4.87e-05	0.00193
9582	APOBEC3B	apolipoprotein B mRNA editing enzyme catalytic subunit 3B [Source:HGNC Symbol;Acc:HGNC:17352]	7.53	9.71	2.18	4.53	0.01	0.0382
6440	SFTPC	surfactant protein C [Source:HGNC Symbol;Acc:HGNC:10802]	9.41	11.6	2.16	4.48	0.0081	0.0336
4814	NINJ1	ninjurin 1 [Source:HGNC Symbol;Acc:HGNC:7824]	9.86	12	2.15	4.43	3.42e-06	0.000525
23608	MKRN1	makorin ring finger protein 1 [Source:HGNC Symbol;Acc:HGNC:7112]	8.38	10.5	2.11	4.31	2.06e-06	0.000442
8553	BHLHE40	basic helix-loop-helix family member e40 [Source:HGNC Symbol;Acc:HGNC:1046]	8.1	10.1	2.05	4.14	2e-07	0.000184
10672	GNA13	G protein subunit alpha 13 [Source:HGNC Symbol;Acc:HGNC:4381]	4.23	6.27	2.04	4.1	3.02e-05	0.00148
7078	TIMP3	TIMP metallopeptidase inhibitor 3 [Source:HGNC Symbol;Acc:HGNC:11822]	4.87	6.86	1.99	3.97	0.000581	0.00725
11197	WIF1	WNT inhibitory factor 1 [Source:HGNC Symbol;Acc:HGNC:18081]	4.13	6.08	1.96	3.88	0.00239	0.0164
10912	GADD45G	growth arrest and DNA damage inducible gamma [Source:HGNC Symbol;Acc:HGNC:4097]	5.07	7	1.93	3.81	2.39e-05	0.00135
4053	LTBP2	latent transforming growth factor beta binding protein 2 [Source:HGNC Symbol;Acc:HGNC:6715]	5.19	7.11	1.92	3.78	0.000735	0.00823
3909	LAMA3	laminin subunit alpha 3 [Source:HGNC Symbol;Acc:HGNC:6483]	4.58	6.48	1.91	3.75	0.000588	0.00728
26471	NUPR1	nuclear protein 1, transcriptional regulator [Source:HGNC Symbol;Acc:HGNC:29990]	10.7	12.6	1.9	3.72	5.2e-07	0.000266
10106	CTDSP2	CTD small phosphatase 2 [Source:HGNC Symbol;Acc:HGNC:17077]	8.21	10.1	1.84	3.58	4.43e-05	0.00184
6001	RGS10	regulator of G protein signaling 10 [Source:HGNC Symbol;Acc:HGNC:9992]	7.21	9.01	1.8	3.48	0.00309	0.0191
1475	CSTA	cystatin A [Source:HGNC Symbol;Acc:HGNC:2481]	7.11	8.88	1.78	3.43	0.00437	0.0234
5157	PDGFRL	platelet derived growth factor receptor like [Source:HGNC Symbol;Acc:HGNC:8805]	5.95	7.73	1.78	3.43	0.0111	0.0405
50486	G0S2	G0/G1 switch 2 [Source:HGNC Symbol;Acc:HGNC:30229]	9.62	11.4	1.76	3.39	0.00875	0.0352
9572	NR1D1	nuclear receptor subfamily 1 group D member 1 [Source:HGNC Symbol;Acc:HGNC:7962]	7.06	8.81	1.75	3.37	1.76e-07	0.000184
200315	APOBEC3A	apolipoprotein B mRNA editing enzyme catalytic subunit 3A [Source:HGNC Symbol;Acc:HGNC:17343]	8.81	10.6	1.75	3.36	0.00973	0.0375
1594	CYP27B1	cytochrome P450 family 27 subfamily B member 1 [Source:HGNC Symbol;Acc:HGNC:2606]	6.39	8.12	1.73	3.31	0.00273	0.0176
6038	RNASE4	ribonuclease A family member 4 [Source:HGNC Symbol;Acc:HGNC:10047]	7.89	9.61	1.72	3.29	1.05e-05	0.000879
54800	KLHL24	kelch like family member 24 [Source:HGNC Symbol;Acc:HGNC:25947]	6.83	8.53	1.7	3.25	0.00122	0.0112
8638	OASL	2'-5'-oligoadenylate synthetase like [Source:HGNC Symbol;Acc:HGNC:8090]	6.78	8.48	1.69	3.24	4.3e-06	0.000544
9530	BAG4	BCL2 associated athanogene 4 [Source:HGNC Symbol;Acc:HGNC:940]	4.12	5.8	1.68	3.2	0.00261	0.0172
29995	LMCD1	LIM and cysteine rich domains 1 [Source:HGNC Symbol;Acc:HGNC:6633]	5.38	7.05	1.67	3.19	0.00506	0.0255
23215	PRRC2C	proline rich coiled-coil 2C [Source:HGNC Symbol;Acc:HGNC:24903]	7.39	9.07	1.67	3.19	0.000374	0.00576
3489	IGFBP6	insulin like growth factor binding protein 6 [Source:HGNC Symbol;Acc:HGNC:5475]	6.07	7.73	1.66	3.16	0.0118	0.0419
6095	RORA	RAR related orphan receptor A [Source:HGNC Symbol;Acc:HGNC:10258]	7	8.66	1.66	3.16	0.000112	0.003
5265	SERPINA1	serpin family A member 1 [Source:HGNC Symbol;Acc:HGNC:8941]	9.76	11.4	1.64	3.11	0.00258	0.0172
3486	IGFBP3	insulin like growth factor binding protein 3 [Source:HGNC Symbol;Acc:HGNC:5472]	9.65	11.3	1.61	3.05	0.00585	0.0277
79018	GID4	GID complex subunit 4 homolog [Source:HGNC Symbol;Acc:HGNC:28453]	5.12	6.7	1.58	2.99	0.000248	0.00468
51191	HERC5	HECT and RLD domain containing E3 ubiquitin protein ligase 5 [Source:HGNC Symbol;Acc:HGNC:24368]	5.82	7.4	1.58	2.98	0.000834	0.00896
9590	AKAP12	A-kinase anchoring protein 12 [Source:HGNC Symbol;Acc:HGNC:370]	6.32	7.9	1.57	2.98	0.00444	0.0236
10123	ARL4C	ADP ribosylation factor like GTPase 4C [Source:HGNC Symbol;Acc:HGNC:698]	6.36	7.92	1.57	2.97	0.000963	0.00972
54344	DPM3	dolichyl-phosphate mannosyltransferase subunit 3 [Source:HGNC Symbol;Acc:HGNC:3007]	6.88	8.45	1.57	2.97	4.94e-06	0.000588
3398	ID2	inhibitor of DNA binding 2, HLH protein [Source:HGNC Symbol;Acc:HGNC:5361]	8.77	10.3	1.55	2.93	0.000667	0.00774
3918	LAMC2	laminin subunit gamma 2 [Source:HGNC Symbol;Acc:HGNC:6493]	8.18	9.72	1.54	2.91	0.00032	0.00533
56605	ERO1B	endoplasmic reticulum oxidoreductase 1 beta [Source:HGNC Symbol;Acc:HGNC:14355]	4.79	6.32	1.53	2.89	0.0108	0.0399
57035	RSRP1	arginine and serine rich protein 1 [Source:HGNC Symbol;Acc:HGNC:25234]	5.24	6.77	1.53	2.89	0.000151	0.0036
4501	MT1X	metallothionein 1X [Source:HGNC Symbol;Acc:HGNC:7405]	10	11.6	1.53	2.88	0.006	0.028
64078	SLC28A3	solute carrier family 28 member 3 [Source:HGNC Symbol;Acc:HGNC:16484]	5.65	7.18	1.53	2.88	0.00328	0.0198
2335	FN1	fibronectin 1 [Source:HGNC Symbol;Acc:HGNC:3778]	8.74	10.3	1.52	2.87	0.0115	0.0413
4322	MMP13	matrix metallopeptidase 13 [Source:HGNC Symbol;Acc:HGNC:7159]	3.88	5.4	1.52	2.87	0.0132	0.0449
6004	RGS16	regulator of G protein signaling 16 [Source:HGNC Symbol;Acc:HGNC:9997]	5.84	7.34	1.5	2.83	0.00143	0.0123
10581	IFITM2	interferon induced transmembrane protein 2 [Source:HGNC Symbol;Acc:HGNC:5413]	9.89	11.4	1.5	2.82	0.000188	0.00405
56944	OLFML3	olfactomedin like 3 [Source:HGNC Symbol;Acc:HGNC:24956]	4.4	5.89	1.49	2.81	0.000474	0.00651
106480890	NA	NA	6.4	7.89	1.49	2.8	7.27e-05	0.00242
55209	SETD5	SET domain containing 5 [Source:HGNC Symbol;Acc:HGNC:25566]	7.28	8.76	1.48	2.79	0.000663	0.00774
79625	NDNF	neuron derived neurotrophic factor [Source:HGNC Symbol;Acc:HGNC:26256]	6.08	7.55	1.47	2.77	0.0114	0.0412
3956	LGALS1	galectin 1 [Source:HGNC Symbol;Acc:HGNC:6561]	10.9	12.3	1.47	2.76	0.00914	0.0361
81606	LBH	limb bud and heart development [Source:HGNC Symbol;Acc:HGNC:29532]	6.79	8.25	1.46	2.76	0.00848	0.0345
283131	NEAT1	nuclear paraspeckle assembly transcript 1 (non-protein coding) [Source:HGNC Symbol;Acc:HGNC:30815]	4.37	5.83	1.46	2.75	0.00901	0.0357
3005	H1F0	H1 histone family member 0 [Source:HGNC Symbol;Acc:HGNC:4714]	9.13	10.6	1.46	2.74	6.79e-07	0.000268
5292	PIM1	Pim-1 proto-oncogene, serine/threonine kinase [Source:HGNC Symbol;Acc:HGNC:8986]	7.84	9.29	1.45	2.74	0.000705	0.00803
6322	SCML1	sex comb on midleg like 1 (Drosophila) [Source:HGNC Symbol;Acc:HGNC:10580]	6.07	7.52	1.45	2.73	0.00287	0.0182
12	SERPINA3	serpin family A member 3 [Source:HGNC Symbol;Acc:HGNC:16]	5.76	7.21	1.45	2.73	5.26e-05	0.00199
3487	IGFBP4	insulin like growth factor binding protein 4 [Source:HGNC Symbol;Acc:HGNC:5473]	6.17	7.6	1.44	2.71	0.00337	0.0201
57466	SCAF4	SR-related CTD associated factor 4 [Source:HGNC Symbol;Acc:HGNC:19304]	5.91	7.34	1.44	2.7	0.0026	0.0172
3212	HOXB2	homeobox B2 [Source:HGNC Symbol;Acc:HGNC:5113]	6.02	7.44	1.43	2.69	0.000148	0.00356
1474	CST6	cystatin E/M [Source:HGNC Symbol;Acc:HGNC:2478]	8.56	9.98	1.42	2.68	0.000631	0.00754
1284	COL4A2	collagen type IV alpha 2 chain [Source:HGNC Symbol;Acc:HGNC:2203]	4.61	6.03	1.42	2.67	0.0117	0.0416
81618	ITM2C	integral membrane protein 2C [Source:HGNC Symbol;Acc:HGNC:6175]	6.42	7.83	1.41	2.66	0.000854	0.00904
5652	PRSS8	protease, serine 8 [Source:HGNC Symbol;Acc:HGNC:9491]	9.04	10.4	1.41	2.66	0.00378	0.0214
4783	NFIL3	nuclear factor, interleukin 3 regulated [Source:HGNC Symbol;Acc:HGNC:7787]	7.67	9.08	1.41	2.65	0.000575	0.00721
3202	HOXA5	homeobox A5 [Source:HGNC Symbol;Acc:HGNC:5106]	4.17	5.57	1.4	2.64	0.0078	0.0328
1831	TSC22D3	TSC22 domain family member 3 [Source:HGNC Symbol;Acc:HGNC:3051]	7.19	8.58	1.39	2.63	8.38e-05	0.00259
6535	SLC6A8	solute carrier family 6 member 8 [Source:HGNC Symbol;Acc:HGNC:11055]	5.03	6.42	1.39	2.61	0.0109	0.0401
177	AGER	advanced glycosylation end-product specific receptor [Source:HGNC Symbol;Acc:HGNC:320]	4.84	6.22	1.38	2.61	0.00139	0.0121
1978	EIF4EBP1	eukaryotic translation initiation factor 4E binding protein 1 [Source:HGNC Symbol;Acc:HGNC:3288]	7.14	8.52	1.38	2.61	0.000152	0.00362
8543	LMO4	LIM domain only 4 [Source:HGNC Symbol;Acc:HGNC:6644]	7.38	8.76	1.38	2.6	0.00202	0.015
23562	CLDN14	claudin 14 [Source:HGNC Symbol;Acc:HGNC:2035]	4.23	5.6	1.38	2.59	0.00449	0.0238
23213	SULF1	sulfatase 1 [Source:HGNC Symbol;Acc:HGNC:20391]	5.21	6.57	1.36	2.57	0.0138	0.0462
1910	EDNRB	endothelin receptor type B [Source:HGNC Symbol;Acc:HGNC:3180]	6.51	7.86	1.35	2.55	0.013	0.0446
2669	GEM	GTP binding protein overexpressed in skeletal muscle [Source:HGNC Symbol;Acc:HGNC:4234]	7.31	8.66	1.35	2.55	0.0106	0.0394
6338	SCNN1B	sodium channel epithelial 1 beta subunit [Source:HGNC Symbol;Acc:HGNC:10600]	4.83	6.18	1.35	2.55	4.06e-05	0.00172
2309	FOXO3	forkhead box O3 [Source:HGNC Symbol;Acc:HGNC:3821]	8.84	10.2	1.35	2.54	0.000113	0.00303
3012	HIST1H2AE	histone cluster 1 H2A family member e [Source:HGNC Symbol;Acc:HGNC:4724]	3.93	5.27	1.34	2.54	0.0117	0.0417
3621	ING1	inhibitor of growth family member 1 [Source:HGNC Symbol;Acc:HGNC:6062]	6.04	7.37	1.34	2.53	7.08e-05	0.00237
55975	KLHL7	kelch like family member 7 [Source:HGNC Symbol;Acc:HGNC:15646]	7.74	9.08	1.34	2.53	0.000142	0.00345
9990	SLC12A6	solute carrier family 12 member 6 [Source:HGNC Symbol;Acc:HGNC:10914]	4.61	5.95	1.34	2.53	0.00589	0.0277
123872	DNAAF1	dynein axonemal assembly factor 1 [Source:HGNC Symbol;Acc:HGNC:30539]	4.83	6.16	1.33	2.51	0.00395	0.022
1263	PLK3	polo like kinase 3 [Source:HGNC Symbol;Acc:HGNC:2154]	5.48	6.81	1.33	2.51	0.00538	0.0263
10397	NDRG1	N-myc downstream regulated 1 [Source:HGNC Symbol;Acc:HGNC:7679]	10.2	11.6	1.32	2.5	0.00366	0.021
8545	CGGBP1	CGG triplet repeat binding protein 1 [Source:HGNC Symbol;Acc:HGNC:1888]	8.05	9.36	1.31	2.48	0.000173	0.00387
58494	JAM2	junctional adhesion molecule 2 [Source:HGNC Symbol;Acc:HGNC:14686]	4.65	5.96	1.3	2.47	0.00691	0.0306
28683	NA	NA	6.49	7.79	1.3	2.46	0.000479	0.00657
10395	DLC1	DLC1 Rho GTPase activating protein [Source:HGNC Symbol;Acc:HGNC:2897]	6.64	7.93	1.29	2.45	0.000546	0.00702
4929	NR4A2	nuclear receptor subfamily 4 group A member 2 [Source:HGNC Symbol;Acc:HGNC:7981]	5.98	7.27	1.29	2.45	0.00256	0.0171
684	BST2	bone marrow stromal cell antigen 2 [Source:HGNC Symbol;Acc:HGNC:1119]	7.69	8.97	1.29	2.44	6.26e-05	0.0022
9254	CACNA2D2	calcium voltage-gated channel auxiliary subunit alpha2delta 2 [Source:HGNC Symbol;Acc:HGNC:1400]	5.74	7.03	1.29	2.44	0.00324	0.0196
113791	PIK3IP1	phosphoinositide-3-kinase interacting protein 1 [Source:HGNC Symbol;Acc:HGNC:24942]	7.8	9.08	1.29	2.44	0.00017	0.00384
90362	FAM110B	family with sequence similarity 110 member B [Source:HGNC Symbol;Acc:HGNC:28587]	4.5	5.78	1.28	2.44	0.00195	0.0147
3490	IGFBP7	insulin like growth factor binding protein 7 [Source:HGNC Symbol;Acc:HGNC:5476]	9.85	11.1	1.28	2.43	0.00545	0.0265
5090	PBX3	PBX homeobox 3 [Source:HGNC Symbol;Acc:HGNC:8634]	5.65	6.92	1.27	2.42	0.000354	0.00557
10250	SRRM1	serine and arginine repetitive matrix 1 [Source:HGNC Symbol;Acc:HGNC:16638]	7.97	9.24	1.27	2.41	0.00122	0.0112
627	BDNF	brain derived neurotrophic factor [Source:HGNC Symbol;Acc:HGNC:1033]	3.62	4.88	1.26	2.4	0.00837	0.0343
3485	IGFBP2	insulin like growth factor binding protein 2 [Source:HGNC Symbol;Acc:HGNC:5471]	5.1	6.37	1.26	2.4	0.00126	0.0115
247	ALOX15B	arachidonate 15-lipoxygenase, type B [Source:HGNC Symbol;Acc:HGNC:434]	7.08	8.34	1.26	2.39	0.00405	0.0222
7378	UPP1	uridine phosphorylase 1 [Source:HGNC Symbol;Acc:HGNC:12576]	8.87	10.1	1.26	2.39	0.00884	0.0354
2013	EMP2	epithelial membrane protein 2 [Source:HGNC Symbol;Acc:HGNC:3334]	9.22	10.5	1.24	2.36	0.000534	0.00692
2877	GPX2	glutathione peroxidase 2 [Source:HGNC Symbol;Acc:HGNC:4554]	5.76	7	1.24	2.36	0.00845	0.0345
2348	FOLR1	folate receptor 1 [Source:HGNC Symbol;Acc:HGNC:3791]	7.09	8.32	1.24	2.35	0.0102	0.0387
55603	FAM46A	family with sequence similarity 46 member A [Source:HGNC Symbol;Acc:HGNC:18345]	8.61	9.85	1.23	2.35	4.02e-06	0.000536
8971	H1FX	H1 histone family member X [Source:HGNC Symbol;Acc:HGNC:4722]	7.77	9	1.23	2.35	0.000382	0.00585
673	BRAF	B-Raf proto-oncogene, serine/threonine kinase [Source:HGNC Symbol;Acc:HGNC:1097]	6.11	7.34	1.23	2.34	1.54e-05	0.00106
3148	HMGB2	high mobility group box 2 [Source:HGNC Symbol;Acc:HGNC:5000]	8.42	9.64	1.22	2.33	2.64e-06	0.000463
10964	IFI44L	interferon induced protein 44 like [Source:HGNC Symbol;Acc:HGNC:17817]	9.27	10.5	1.22	2.33	0.0022	0.0157
28727	NA	NA	6.35	7.56	1.21	2.32	0.00087	0.00914
2803	GOLGA4	golgin A4 [Source:HGNC Symbol;Acc:HGNC:4427]	6.94	8.13	1.2	2.29	0.000837	0.00896
5187	PER1	period circadian clock 1 [Source:HGNC Symbol;Acc:HGNC:8845]	5.98	7.18	1.2	2.29	1.38e-05	0.00105
79618	HMBOX1	homeobox containing 1 [Source:HGNC Symbol;Acc:HGNC:26137]	7.42	8.61	1.19	2.29	0.000102	0.00287
54985	HCFC1R1	host cell factor C1 regulator 1 [Source:HGNC Symbol;Acc:HGNC:21198]	6.36	7.54	1.19	2.27	0.000828	0.00895
5947	RBP1	retinol binding protein 1 [Source:HGNC Symbol;Acc:HGNC:9919]	5.34	6.52	1.18	2.27	0.00068	0.00784
57396	CLK4	CDC like kinase 4 [Source:HGNC Symbol;Acc:HGNC:13659]	6.07	7.25	1.18	2.26	0.00027	0.00486
9249	DHRS3	dehydrogenase/reductase 3 [Source:HGNC Symbol;Acc:HGNC:17693]	7.42	8.6	1.18	2.26	4.71e-05	0.0019
54541	DDIT4	DNA damage inducible transcript 4 [Source:HGNC Symbol;Acc:HGNC:24944]	9.23	10.4	1.17	2.25	0.00872	0.0351
56649	TMPRSS4	transmembrane protease, serine 4 [Source:HGNC Symbol;Acc:HGNC:11878]	6.02	7.19	1.17	2.24	0.0136	0.0459
10365	KLF2	Kruppel like factor 2 [Source:HGNC Symbol;Acc:HGNC:6347]	5.79	6.96	1.16	2.24	1.98e-05	0.00121
65109	UPF3B	UPF3B, regulator of nonsense mediated mRNA decay [Source:HGNC Symbol;Acc:HGNC:20439]	4.62	5.78	1.16	2.24	0.00149	0.0125
6046	BRD2	bromodomain containing 2 [Source:HGNC Symbol;Acc:HGNC:1103]	8.24	9.39	1.15	2.23	0.000432	0.00621
51026	GOLT1B	golgi transport 1B [Source:HGNC Symbol;Acc:HGNC:20175]	9.18	10.3	1.15	2.22	6.48e-05	0.00225
3164	NR4A1	nuclear receptor subfamily 4 group A member 1 [Source:HGNC Symbol;Acc:HGNC:7980]	5.24	6.4	1.15	2.22	0.000188	0.00405
4925	NUCB2	nucleobindin 2 [Source:HGNC Symbol;Acc:HGNC:8044]	8.39	9.54	1.15	2.22	0.00338	0.0201
80176	SPSB1	splA/ryanodine receptor domain and SOCS box containing 1 [Source:HGNC Symbol;Acc:HGNC:30628]	7.76	8.91	1.15	2.22	0.000473	0.00651
7706	TRIM25	tripartite motif containing 25 [Source:HGNC Symbol;Acc:HGNC:12932]	5.83	6.98	1.15	2.21	0.00663	0.0299
54855	FAM46C	family with sequence similarity 46 member C [Source:HGNC Symbol;Acc:HGNC:24712]	4.35	5.49	1.14	2.21	0.000492	0.00667
6676	SPAG4	sperm associated antigen 4 [Source:HGNC Symbol;Acc:HGNC:11214]	5.93	7.07	1.14	2.21	0.00775	0.0327
8614	STC2	stanniocalcin 2 [Source:HGNC Symbol;Acc:HGNC:11374]	4.35	5.49	1.14	2.21	0.0139	0.0465
3309	HSPA5	heat shock protein family A (Hsp70) member 5 [Source:HGNC Symbol;Acc:HGNC:5238]	11.1	12.2	1.14	2.2	3.16e-05	0.0015
9636	ISG15	ISG15 ubiquitin-like modifier [Source:HGNC Symbol;Acc:HGNC:4053]	11.4	12.5	1.14	2.2	6.57e-05	0.00226
53827	FXYD5	FXYD domain containing ion transport regulator 5 [Source:HGNC Symbol;Acc:HGNC:4029]	7.81	8.94	1.13	2.2	0.000445	0.0063
392305	NA	NA	4.39	5.51	1.12	2.18	0.000172	0.00386
10407	SPAG11B	sperm associated antigen 11B [Source:HGNC Symbol;Acc:HGNC:14534]	3.62	4.74	1.12	2.17	0.00568	0.0272
1556	CYP2B7P	cytochrome P450 family 2 subfamily B member 7, pseudogene [Source:HGNC Symbol;Acc:HGNC:2616]	5.63	6.74	1.11	2.16	5.28e-05	0.00199
9094	UNC119	unc-119 lipid binding chaperone [Source:HGNC Symbol;Acc:HGNC:12565]	6.94	8.05	1.11	2.16	5.04e-05	0.00197
7538	ZFP36	ZFP36 ring finger protein [Source:HGNC Symbol;Acc:HGNC:12862]	8.77	9.88	1.11	2.16	0.00178	0.0139
945	CD33	CD33 molecule [Source:HGNC Symbol;Acc:HGNC:1659]	4.35	5.45	1.1	2.14	0.00341	0.0202
2331	FMOD	fibromodulin [Source:HGNC Symbol;Acc:HGNC:3774]	5.68	6.78	1.1	2.14	0.000332	0.00542
4061	LY6E	lymphocyte antigen 6 family member E [Source:HGNC Symbol;Acc:HGNC:6727]	7.42	8.52	1.1	2.14	6.45e-05	0.00225
10628	TXNIP	thioredoxin interacting protein [Source:HGNC Symbol;Acc:HGNC:16952]	9.43	10.5	1.1	2.14	0.000192	0.0041
3872	KRT17	keratin 17 [Source:HGNC Symbol;Acc:HGNC:6427]	9.41	10.5	1.09	2.14	0.000693	0.00794
51526	OSER1	oxidative stress responsive serine rich 1 [Source:HGNC Symbol;Acc:HGNC:16105]	7.4	8.48	1.08	2.12	8.61e-05	0.00261
10301	DLEU1	deleted in lymphocytic leukemia 1 (non-protein coding) [Source:HGNC Symbol;Acc:HGNC:13747]	5.77	6.85	1.08	2.11	0.000637	0.00758
3755	KCNG1	potassium voltage-gated channel modifier subfamily G member 1 [Source:HGNC Symbol;Acc:HGNC:6248]	3.82	4.9	1.08	2.11	0.0116	0.0416
3895	KTN1	kinectin 1 [Source:HGNC Symbol;Acc:HGNC:6467]	9.11	10.2	1.08	2.11	0.000611	0.00747
55679	LIMS2	LIM zinc finger domain containing 2 [Source:HGNC Symbol;Acc:HGNC:16084]	5.48	6.56	1.08	2.11	2.25e-05	0.00129
25819	NOCT	nocturnin [Source:HGNC Symbol;Acc:HGNC:14254]	5.24	6.31	1.08	2.11	0.0086	0.0348
6520	SLC3A2	solute carrier family 3 member 2 [Source:HGNC Symbol;Acc:HGNC:11026]	8.28	9.36	1.08	2.11	0.000491	0.00667
2801	GOLGA2	golgin A2 [Source:HGNC Symbol;Acc:HGNC:4425]	6.22	7.3	1.07	2.11	0.0016	0.0131
65117	RSRC2	arginine and serine rich coiled-coil 2 [Source:HGNC Symbol;Acc:HGNC:30559]	7.85	8.92	1.07	2.1	0.000574	0.00721
2687	GGT5	gamma-glutamyltransferase 5 [Source:HGNC Symbol;Acc:HGNC:4260]	4.85	5.92	1.06	2.09	0.00192	0.0146
56675	NRIP3	nuclear receptor interacting protein 3 [Source:HGNC Symbol;Acc:HGNC:1167]	7.51	8.57	1.06	2.09	0.0109	0.04
55758	RCOR3	REST corepressor 3 [Source:HGNC Symbol;Acc:HGNC:25594]	4.67	5.74	1.06	2.09	0.00223	0.0158
1491	CTH	cystathionine gamma-lyase [Source:HGNC Symbol;Acc:HGNC:2501]	6.27	7.33	1.06	2.08	0.00802	0.0334
8349	HIST2H2BE	histone cluster 2 H2B family member e [Source:HGNC Symbol;Acc:HGNC:4760]	7.07	8.13	1.06	2.08	0.013	0.0446
11277	TREX1	three prime repair exonuclease 1 [Source:HGNC Symbol;Acc:HGNC:12269]	7.95	9.01	1.06	2.08	0.000153	0.00362
1462	VCAN	versican [Source:HGNC Symbol;Acc:HGNC:2464]	3.81	4.86	1.06	2.08	0.00953	0.037
55249	YY1AP1	YY1 associated protein 1 [Source:HGNC Symbol;Acc:HGNC:30935]	7.3	8.36	1.06	2.08	0.00383	0.0215
9262	STK17B	serine/threonine kinase 17b [Source:HGNC Symbol;Acc:HGNC:11396]	5.8	6.85	1.05	2.08	0.00116	0.0109
9127	P2RX6	purinergic receptor P2X 6 [Source:HGNC Symbol;Acc:HGNC:8538]	4.21	5.26	1.05	2.07	0.00877	0.0352
23524	SRRM2	serine/arginine repetitive matrix 2 [Source:HGNC Symbol;Acc:HGNC:16639]	5.85	6.9	1.05	2.07	0.000503	0.00671
7175	TPR	translocated promoter region, nuclear basket protein [Source:HGNC Symbol;Acc:HGNC:12017]	6.43	7.48	1.05	2.07	0.00895	0.0356
60681	FKBP10	FK506 binding protein 10 [Source:HGNC Symbol;Acc:HGNC:18169]	4.93	5.98	1.05	2.06	0.00124	0.0113
56886	UGGT1	UDP-glucose glycoprotein glucosyltransferase 1 [Source:HGNC Symbol;Acc:HGNC:15663]	5.89	6.94	1.05	2.06	0.000661	0.00774
165	AEBP1	AE binding protein 1 [Source:HGNC Symbol;Acc:HGNC:303]	5.74	6.78	1.04	2.06	0.00722	0.0314
8444	DYRK3	dual specificity tyrosine phosphorylation regulated kinase 3 [Source:HGNC Symbol;Acc:HGNC:3094]	7.19	8.23	1.04	2.06	7.55e-05	0.00245
56965	PARP6	poly(ADP-ribose) polymerase family member 6 [Source:HGNC Symbol;Acc:HGNC:26921]	7.98	9.02	1.04	2.06	0.00053	0.0069
55339	WDR33	WD repeat domain 33 [Source:HGNC Symbol;Acc:HGNC:25651]	3.74	4.78	1.04	2.05	0.00757	0.0323
3306	HSPA2	heat shock protein family A (Hsp70) member 2 [Source:HGNC Symbol;Acc:HGNC:5235]	5.82	6.85	1.03	2.05	0.000838	0.00896
3726	JUNB	JunB proto-oncogene, AP-1 transcription factor subunit [Source:HGNC Symbol;Acc:HGNC:6205]	7.44	8.47	1.03	2.05	0.0018	0.014
283876	LINC00921	long intergenic non-protein coding RNA 921 [Source:HGNC Symbol;Acc:HGNC:26830]	5.58	6.61	1.03	2.05	0.000152	0.00362
9902	MRC2	mannose receptor C type 2 [Source:HGNC Symbol;Acc:HGNC:16875]	7.13	8.16	1.03	2.05	0.00131	0.0116
50854	C6orf48	chromosome 6 open reading frame 48 [Source:HGNC Symbol;Acc:HGNC:19078]	9.51	10.5	1.03	2.04	0.00143	0.0123
2650	GCNT1	glucosaminyl (N-acetyl) transferase 1, core 2 [Source:HGNC Symbol;Acc:HGNC:4203]	5.32	6.35	1.03	2.04	0.000712	0.0081
7472	WNT2	Wnt family member 2 [Source:HGNC Symbol;Acc:HGNC:12780]	4.72	5.74	1.03	2.04	0.00288	0.0182
100126791	EGOT	eosinophil granule ontogeny transcript (non-protein coding) [Source:HGNC Symbol;Acc:HGNC:37129]	5.63	6.65	1.02	2.03	0.000134	0.0033
53826	FXYD6	FXYD domain containing ion transport regulator 6 [Source:HGNC Symbol;Acc:HGNC:4030]	5.91	6.93	1.02	2.03	0.00404	0.0222
3868	KRT16	keratin 16 [Source:HGNC Symbol;Acc:HGNC:6423]	4.12	5.15	1.02	2.03	0.00189	0.0145
3854	KRT6B	keratin 6B [Source:HGNC Symbol;Acc:HGNC:6444]	4.8	5.82	1.02	2.03	0.000571	0.00721
259173	ALS2CL	ALS2 C-terminal like [Source:HGNC Symbol;Acc:HGNC:20605]	6.44	7.46	1.02	2.02	6.06e-05	0.00217
140101	NA	NA	5.86	6.88	1.02	2.02	0.00055	0.00705
64218	SEMA4A	semaphorin 4A [Source:HGNC Symbol;Acc:HGNC:10729]	6.64	7.66	1.02	2.02	0.000181	0.00396
5465	PPARA	peroxisome proliferator activated receptor alpha [Source:HGNC Symbol;Acc:HGNC:9232]	4.09	5.1	1.01	2.02	0.000299	0.00511
6429	SRSF4	serine and arginine rich splicing factor 4 [Source:HGNC Symbol;Acc:HGNC:10786]	7.79	8.79	1.01	2.01	2.15e-05	0.00126
51317	PHF21A	PHD finger protein 21A [Source:HGNC Symbol;Acc:HGNC:24156]	6.41	7.41	1	2.01	0.000905	0.00934
858	CAV2	caveolin 2 [Source:HGNC Symbol;Acc:HGNC:1528]	9.66	8.65	-1	0.499	0.000792	0.00866
1117	CHI3L2	chitinase 3 like 2 [Source:HGNC Symbol;Acc:HGNC:1933]	9.16	8.16	-1	0.499	0.00965	0.0374
57498	KIDINS220	kinase D interacting substrate 220 [Source:HGNC Symbol;Acc:HGNC:29508]	7.52	6.52	-1	0.499	0.00337	0.0201
4676	NAP1L4	nucleosome assembly protein 1 like 4 [Source:HGNC Symbol;Acc:HGNC:7640]	7.4	6.39	-1	0.499	9.06e-05	0.00269
79717	PPCS	phosphopantothenoylcysteine synthetase [Source:HGNC Symbol;Acc:HGNC:25686]	8.78	7.78	-1	0.499	0.0021	0.0153
5048	PAFAH1B1	platelet activating factor acetylhydrolase 1b regulatory subunit 1 [Source:HGNC Symbol;Acc:HGNC:8574]	7.19	6.18	-1	0.498	1.2e-05	0.000948
55034	MOCOS	molybdenum cofactor sulfurase [Source:HGNC Symbol;Acc:HGNC:18234]	6.55	5.54	-1.01	0.498	0.00766	0.0325
27068	PPA2	pyrophosphatase (inorganic) 2 [Source:HGNC Symbol;Acc:HGNC:28883]	10.2	9.23	-1.01	0.498	0.002	0.0149
26135	SERBP1	SERPINE1 mRNA binding protein 1 [Source:HGNC Symbol;Acc:HGNC:17860]	9.3	8.29	-1.01	0.498	0.000329	0.00539
80208	SPG11	SPG11, spatacsin vesicle trafficking associated [Source:HGNC Symbol;Acc:HGNC:11226]	8.27	7.26	-1.01	0.498	0.00197	0.0148
66008	TRAK2	trafficking kinesin protein 2 [Source:HGNC Symbol;Acc:HGNC:13206]	7.76	6.75	-1.01	0.498	0.00401	0.0222
79882	ZC3H14	zinc finger CCCH-type containing 14 [Source:HGNC Symbol;Acc:HGNC:20509]	6.49	5.49	-1.01	0.498	5.27e-05	0.00199
3065	HDAC1	histone deacetylase 1 [Source:HGNC Symbol;Acc:HGNC:4852]	7.75	6.74	-1.01	0.497	0.00116	0.0109
4682	NUBP1	nucleotide binding protein 1 [Source:HGNC Symbol;Acc:HGNC:8041]	7.11	6.1	-1.01	0.497	0.00905	0.0359
58495	OVOL2	ovo like zinc finger 2 [Source:HGNC Symbol;Acc:HGNC:15804]	6.57	5.56	-1.01	0.497	0.00348	0.0204
5300	PIN1	peptidylprolyl cis/trans isomerase, NIMA-interacting 1 [Source:HGNC Symbol;Acc:HGNC:8988]	7.4	6.39	-1.01	0.497	0.000343	0.00548
5704	PSMC4	proteasome 26S subunit, ATPase 4 [Source:HGNC Symbol;Acc:HGNC:9551]	9.01	8	-1.01	0.497	2.36e-05	0.00134
7259	TSPYL1	TSPY like 1 [Source:HGNC Symbol;Acc:HGNC:12382]	10.9	9.89	-1.01	0.497	0.000108	0.00293
11062	DUS4L	dihydrouridine synthase 4 like [Source:HGNC Symbol;Acc:HGNC:21517]	5.72	4.71	-1.01	0.496	0.000649	0.00768
29094	LGALSL	galectin like [Source:HGNC Symbol;Acc:HGNC:25012]	7.26	6.25	-1.01	0.496	0.0108	0.0399
9054	NFS1	NFS1, cysteine desulfurase [Source:HGNC Symbol;Acc:HGNC:15910]	7.99	6.98	-1.01	0.496	0.00155	0.0129
81892	SLIRP	SRA stem-loop interacting RNA binding protein [Source:HGNC Symbol;Acc:HGNC:20495]	10.8	9.81	-1.01	0.496	0.000648	0.00768
55832	CAND1	cullin associated and neddylation dissociated 1 [Source:HGNC Symbol;Acc:HGNC:30688]	7.81	6.79	-1.01	0.495	0.000332	0.00542
51306	FAM13B	family with sequence similarity 13 member B [Source:HGNC Symbol;Acc:HGNC:1335]	6.35	5.34	-1.01	0.495	0.00796	0.0332
9562	MINPP1	multiple inositol-polyphosphate phosphatase 1 [Source:HGNC Symbol;Acc:HGNC:7102]	7.88	6.87	-1.01	0.495	0.00108	0.0103
4708	NDUFB2	NADH:ubiquinone oxidoreductase subunit B2 [Source:HGNC Symbol;Acc:HGNC:7697]	10.7	9.65	-1.01	0.495	0.000321	0.00533
27292	DIMT1	DIM1 dimethyladenosine transferase 1 homolog [Source:HGNC Symbol;Acc:HGNC:30217]	8.73	7.71	-1.02	0.495	0.00661	0.0299
55153	SDAD1	SDA1 domain containing 1 [Source:HGNC Symbol;Acc:HGNC:25537]	5.83	4.82	-1.02	0.495	0.00142	0.0123
116984	ARAP2	ArfGAP with RhoGAP domain, ankyrin repeat and PH domain 2 [Source:HGNC Symbol;Acc:HGNC:16924]	7.4	6.38	-1.02	0.494	0.0058	0.0275
1965	EIF2S1	eukaryotic translation initiation factor 2 subunit alpha [Source:HGNC Symbol;Acc:HGNC:3265]	8.71	7.69	-1.02	0.494	0.0137	0.0462
3169	FOXA1	forkhead box A1 [Source:HGNC Symbol;Acc:HGNC:5021]	9.7	8.68	-1.02	0.494	0.00521	0.026
4116	MAGOH	mago homolog, exon junction complex core component [Source:HGNC Symbol;Acc:HGNC:6815]	8.48	7.46	-1.02	0.494	0.00818	0.0338
79892	MCMBP	minichromosome maintenance complex binding protein [Source:HGNC Symbol;Acc:HGNC:25782]	6.25	5.24	-1.02	0.494	3.77e-05	0.00164
54995	OXSM	3-oxoacyl-ACP synthase, mitochondrial [Source:HGNC Symbol;Acc:HGNC:26063]	7.05	6.03	-1.02	0.494	0.00502	0.0254
30849	PIK3R4	phosphoinositide-3-kinase regulatory subunit 4 [Source:HGNC Symbol;Acc:HGNC:8982]	7.46	6.44	-1.02	0.494	0.000977	0.00975
5965	RECQL	RecQ like helicase [Source:HGNC Symbol;Acc:HGNC:9948]	8.16	7.14	-1.02	0.494	0.000293	0.00504
29901	SAC3D1	SAC3 domain containing 1 [Source:HGNC Symbol;Acc:HGNC:30179]	6.65	5.63	-1.02	0.494	0.000474	0.00651
26521	TIMM8B	translocase of inner mitochondrial membrane 8 homolog B [Source:HGNC Symbol;Acc:HGNC:11818]	9.63	8.61	-1.02	0.494	0.000128	0.00324
80775	TMEM177	transmembrane protein 177 [Source:HGNC Symbol;Acc:HGNC:28143]	5.37	4.35	-1.02	0.494	6.71e-05	0.00228
8458	TTF2	transcription termination factor 2 [Source:HGNC Symbol;Acc:HGNC:12398]	4.82	3.8	-1.02	0.494	0.00157	0.013
8697	CDC23	cell division cycle 23 [Source:HGNC Symbol;Acc:HGNC:1724]	7.4	6.38	-1.02	0.493	3.51e-05	0.00157
79959	CEP76	centrosomal protein 76 [Source:HGNC Symbol;Acc:HGNC:25727]	5.87	4.85	-1.02	0.493	0.000297	0.0051
55425	GPALPP1	GPALPP motifs containing 1 [Source:HGNC Symbol;Acc:HGNC:20298]	5.29	4.27	-1.02	0.493	0.000888	0.00924
79582	SPAG16	sperm associated antigen 16 [Source:HGNC Symbol;Acc:HGNC:23225]	6.34	5.32	-1.02	0.493	0.000265	0.00482
8853	ASAP2	ArfGAP with SH3 domain, ankyrin repeat and PH domain 2 [Source:HGNC Symbol;Acc:HGNC:2721]	7.66	6.64	-1.02	0.492	0.00162	0.0132
23406	COTL1	coactosin like F-actin binding protein 1 [Source:HGNC Symbol;Acc:HGNC:18304]	9.61	8.59	-1.02	0.492	5.17e-05	0.00199
1398	CRK	CRK proto-oncogene, adaptor protein [Source:HGNC Symbol;Acc:HGNC:2362]	8.71	7.68	-1.02	0.492	0.000921	0.00946
23412	COMMD3	COMM domain containing 3 [Source:HGNC Symbol;Acc:HGNC:23332]	8.86	7.84	-1.03	0.491	3.17e-05	0.0015
9980	DOPEY2	dopey family member 2 [Source:HGNC Symbol;Acc:HGNC:1291]	5.95	4.92	-1.03	0.491	6.49e-05	0.00225
23658	LSM5	LSM5 homolog, U6 small nuclear RNA and mRNA degradation associated [Source:HGNC Symbol;Acc:HGNC:17162]	5.96	4.93	-1.03	0.491	1.65e-05	0.00108
4642	MYO1D	myosin ID [Source:HGNC Symbol;Acc:HGNC:7598]	6.91	5.88	-1.03	0.491	0.00099	0.00979
23212	RRS1	ribosome biogenesis regulator homolog [Source:HGNC Symbol;Acc:HGNC:17083]	7.41	6.39	-1.03	0.491	0.0031	0.0191
8467	SMARCA5	SWI/SNF related, matrix associated, actin dependent regulator of chromatin, subfamily a, member 5 [Source:HGNC Symbol;Acc:HGNC:11101]	8.66	7.64	-1.03	0.491	0.00796	0.0332
6723	SRM	spermidine synthase [Source:HGNC Symbol;Acc:HGNC:11296]	6.84	5.81	-1.03	0.491	0.0112	0.0407
7353	UFD1	ubiquitin recognition factor in ER associated degradation 1 [Source:HGNC Symbol;Acc:HGNC:12520]	10.1	9.11	-1.03	0.491	0.00185	0.0142
836	CASP3	caspase 3 [Source:HGNC Symbol;Acc:HGNC:1504]	8.44	7.41	-1.03	0.49	0.00043	0.00621
64398	MPP5	membrane palmitoylated protein 5 [Source:HGNC Symbol;Acc:HGNC:18669]	6.76	5.74	-1.03	0.49	0.00329	0.0198
51373	MRPS17	mitochondrial ribosomal protein S17 [Source:HGNC Symbol;Acc:HGNC:14047]	8.17	7.14	-1.03	0.49	0.00163	0.0132
55171	TBCCD1	TBCC domain containing 1 [Source:HGNC Symbol;Acc:HGNC:25546]	5.69	4.67	-1.03	0.49	0.00294	0.0184
9830	TRIM14	tripartite motif containing 14 [Source:HGNC Symbol;Acc:HGNC:16283]	7.6	6.57	-1.03	0.49	2.81e-05	0.00147
27340	UTP20	UTP20, small subunit processome component [Source:HGNC Symbol;Acc:HGNC:17897]	6.25	5.22	-1.03	0.49	0.000876	0.00917
54465	ETAA1	ETAA1, ATR kinase activator [Source:HGNC Symbol;Acc:HGNC:24648]	5.68	4.65	-1.03	0.489	0.000585	0.00727
10827	FAM114A2	family with sequence similarity 114 member A2 [Source:HGNC Symbol;Acc:HGNC:1333]	6.19	5.16	-1.03	0.489	0.000925	0.00947
26235	FBXL4	F-box and leucine rich repeat protein 4 [Source:HGNC Symbol;Acc:HGNC:13601]	7.3	6.26	-1.03	0.489	0.00183	0.0142
22841	RAB11FIP2	RAB11 family interacting protein 2 [Source:HGNC Symbol;Acc:HGNC:29152]	6.95	5.92	-1.03	0.489	0.000268	0.00485
51768	TM7SF3	transmembrane 7 superfamily member 3 [Source:HGNC Symbol;Acc:HGNC:23049]	5.62	4.59	-1.03	0.489	0.00179	0.014
27034	ACAD8	acyl-CoA dehydrogenase family member 8 [Source:HGNC Symbol;Acc:HGNC:87]	5.81	4.78	-1.03	0.488	0.00015	0.0036
79591	C10orf76	chromosome 10 open reading frame 76 [Source:HGNC Symbol;Acc:HGNC:25788]	5.5	4.46	-1.03	0.488	5.19e-06	0.0006
8743	TNFSF10	TNF superfamily member 10 [Source:HGNC Symbol;Acc:HGNC:11925]	12.2	11.2	-1.03	0.488	0.000284	0.00496
9716	AQR	aquarius intron-binding spliceosomal factor [Source:HGNC Symbol;Acc:HGNC:29513]	7.6	6.56	-1.04	0.488	0.00887	0.0354
79876	UBA5	ubiquitin like modifier activating enzyme 5 [Source:HGNC Symbol;Acc:HGNC:23230]	6.3	5.27	-1.04	0.488	0.00368	0.021
498	ATP5A1	ATP synthase, H+ transporting, mitochondrial F1 complex, alpha subunit 1, cardiac muscle [Source:HGNC Symbol;Acc:HGNC:823]	11.7	10.6	-1.04	0.487	0.00137	0.0121
54431	DNAJC10	DnaJ heat shock protein family (Hsp40) member C10 [Source:HGNC Symbol;Acc:HGNC:24637]	7.39	6.35	-1.04	0.487	0.00102	0.00996
2710	GK	glycerol kinase [Source:HGNC Symbol;Acc:HGNC:4289]	9.44	8.4	-1.04	0.487	9.92e-05	0.00284
9443	MED7	mediator complex subunit 7 [Source:HGNC Symbol;Acc:HGNC:2378]	7.49	6.45	-1.04	0.487	0.000215	0.00435
55239	OGFOD1	2-oxoglutarate and iron dependent oxygenase domain containing 1 [Source:HGNC Symbol;Acc:HGNC:25585]	6.63	5.6	-1.04	0.487	0.00392	0.0219
8239	USP9X	ubiquitin specific peptidase 9, X-linked [Source:HGNC Symbol;Acc:HGNC:12632]	8.93	7.89	-1.04	0.487	1.44e-05	0.00106
9183	ZW10	zw10 kinetochore protein [Source:HGNC Symbol;Acc:HGNC:13194]	7.45	6.41	-1.04	0.487	0.00757	0.0323
1778	DYNC1H1	dynein cytoplasmic 1 heavy chain 1 [Source:HGNC Symbol;Acc:HGNC:2961]	8.46	7.42	-1.04	0.486	0.0126	0.0438
2963	GTF2F2	general transcription factor IIF subunit 2 [Source:HGNC Symbol;Acc:HGNC:4653]	6.5	5.46	-1.04	0.486	0.00646	0.0295
23095	KIF1B	kinesin family member 1B [Source:HGNC Symbol;Acc:HGNC:16636]	6.79	5.75	-1.04	0.486	0.0102	0.0386
6182	MRPL12	mitochondrial ribosomal protein L12 [Source:HGNC Symbol;Acc:HGNC:10378]	8.35	7.31	-1.04	0.486	0.000205	0.00423
28973	MRPS18B	mitochondrial ribosomal protein S18B [Source:HGNC Symbol;Acc:HGNC:14516]	7.93	6.89	-1.04	0.486	0.0146	0.0479
4726	NDUFS6	NADH:ubiquinone oxidoreductase subunit S6 [Source:HGNC Symbol;Acc:HGNC:7713]	10.1	9.06	-1.04	0.486	0.000164	0.00379
55695	NSUN5	NOP2/Sun RNA methyltransferase family member 5 [Source:HGNC Symbol;Acc:HGNC:16385]	8.03	6.99	-1.04	0.486	0.000829	0.00895
9141	PDCD5	programmed cell death 5 [Source:HGNC Symbol;Acc:HGNC:8764]	8.51	7.47	-1.04	0.486	8.31e-05	0.00258
5955	RCN2	reticulocalbin 2 [Source:HGNC Symbol;Acc:HGNC:9935]	9.47	8.43	-1.04	0.486	0.00118	0.0109
80145	THOC7	THO complex 7 [Source:HGNC Symbol;Acc:HGNC:29874]	10.2	9.14	-1.04	0.486	0.00866	0.035
26057	ANKRD17	ankyrin repeat domain 17 [Source:HGNC Symbol;Acc:HGNC:23575]	6.27	5.22	-1.04	0.485	0.000719	0.00815
5245	PHB	prohibitin [Source:HGNC Symbol;Acc:HGNC:8912]	8.44	7.4	-1.04	0.485	0.00376	0.0213
5682	PSMA1	proteasome subunit alpha 1 [Source:HGNC Symbol;Acc:HGNC:9530]	12.3	11.2	-1.04	0.485	0.00187	0.0144
51002	TPRKB	TP53RK binding protein [Source:HGNC Symbol;Acc:HGNC:24259]	8.41	7.37	-1.04	0.485	0.0018	0.014
1153	CIRBP	cold inducible RNA binding protein [Source:HGNC Symbol;Acc:HGNC:1982]	9.37	8.32	-1.05	0.485	0.00458	0.0241
10330	CNPY2	canopy FGF signaling regulator 2 [Source:HGNC Symbol;Acc:HGNC:13529]	9.46	8.41	-1.05	0.485	0.00023	0.00451
7260	EIPR1	EARP complex and GARP complex interacting protein 1 [Source:HGNC Symbol;Acc:HGNC:12383]	7.43	6.38	-1.05	0.484	0.000268	0.00485
9439	MED23	mediator complex subunit 23 [Source:HGNC Symbol;Acc:HGNC:2372]	7.66	6.61	-1.05	0.484	0.013	0.0446
4698	NDUFA5	NADH:ubiquinone oxidoreductase subunit A5 [Source:HGNC Symbol;Acc:HGNC:7688]	8.87	7.82	-1.05	0.484	0.000354	0.00557
10654	PMVK	phosphomevalonate kinase [Source:HGNC Symbol;Acc:HGNC:9141]	7.26	6.21	-1.05	0.484	0.00503	0.0254
23075	SWAP70	SWAP switching B-cell complex subunit 70 [Source:HGNC Symbol;Acc:HGNC:17070]	8.42	7.37	-1.05	0.484	0.00787	0.0331
10001	MED6	mediator complex subunit 6 [Source:HGNC Symbol;Acc:HGNC:19970]	7.22	6.17	-1.05	0.483	0.000268	0.00485
27347	STK39	serine/threonine kinase 39 [Source:HGNC Symbol;Acc:HGNC:17717]	8.52	7.47	-1.05	0.483	0.00556	0.0269
22875	ENPP4	ectonucleotide pyrophosphatase/phosphodiesterase 4 (putative) [Source:HGNC Symbol;Acc:HGNC:3359]	7.34	6.28	-1.05	0.482	0.0122	0.043
55770	EXOC2	exocyst complex component 2 [Source:HGNC Symbol;Acc:HGNC:24968]	5.88	4.82	-1.05	0.482	0.0124	0.0434
8790	FPGT	fucose-1-phosphate guanylyltransferase [Source:HGNC Symbol;Acc:HGNC:3825]	5.63	4.57	-1.05	0.482	0.000173	0.00387
4720	NDUFS2	NADH:ubiquinone oxidoreductase core subunit S2 [Source:HGNC Symbol;Acc:HGNC:7708]	9.68	8.63	-1.05	0.482	0.000489	0.00667
54434	SSH1	slingshot protein phosphatase 1 [Source:HGNC Symbol;Acc:HGNC:30579]	7.07	6.01	-1.05	0.482	0.000493	0.00667
60493	FASTKD5	FAST kinase domains 5 [Source:HGNC Symbol;Acc:HGNC:25790]	8.07	7.01	-1.05	0.481	5.22e-05	0.00199
54952	TRNAU1AP	tRNA selenocysteine 1 associated protein 1 [Source:HGNC Symbol;Acc:HGNC:30813]	7.29	6.23	-1.05	0.481	2.45e-05	0.00135
1718	DHCR24	24-dehydrocholesterol reductase [Source:HGNC Symbol;Acc:HGNC:2859]	9.19	8.13	-1.06	0.48	0.0125	0.0436
8726	EED	embryonic ectoderm development [Source:HGNC Symbol;Acc:HGNC:3188]	8.13	7.07	-1.06	0.48	5.36e-06	0.000608
11234	HPS5	HPS5, biogenesis of lysosomal organelles complex 2 subunit 2 [Source:HGNC Symbol;Acc:HGNC:17022]	7.85	6.79	-1.06	0.48	0.00602	0.0281
262	AMD1	adenosylmethionine decarboxylase 1 [Source:HGNC Symbol;Acc:HGNC:457]	8.85	7.79	-1.06	0.479	0.0127	0.0439
80321	CEP70	centrosomal protein 70 [Source:HGNC Symbol;Acc:HGNC:29972]	6.07	5	-1.06	0.479	0.00035	0.00554
8507	ENC1	ectodermal-neural cortex 1 [Source:HGNC Symbol;Acc:HGNC:3345]	6.67	5.61	-1.06	0.479	0.000566	0.00719
80273	GRPEL1	GrpE like 1, mitochondrial [Source:HGNC Symbol;Acc:HGNC:19696]	9.11	8.05	-1.06	0.479	0.000805	0.00876
57470	LRRC47	leucine rich repeat containing 47 [Source:HGNC Symbol;Acc:HGNC:29207]	8.63	7.57	-1.06	0.479	0.00355	0.0206
4292	MLH1	mutL homolog 1 [Source:HGNC Symbol;Acc:HGNC:7127]	7.61	6.55	-1.06	0.479	0.0026	0.0172
6431	SRSF6	serine and arginine rich splicing factor 6 [Source:HGNC Symbol;Acc:HGNC:10788]	7.55	6.48	-1.06	0.479	0.00165	0.0132
7726	TRIM26	tripartite motif containing 26 [Source:HGNC Symbol;Acc:HGNC:12962]	7.06	6	-1.06	0.479	0.00101	0.00991
7582	ZNF33B	zinc finger protein 33B [Source:HGNC Symbol;Acc:HGNC:13097]	5.02	3.96	-1.06	0.479	0.000132	0.0033
81688	C6orf62	chromosome 6 open reading frame 62 [Source:HGNC Symbol;Acc:HGNC:20998]	8.19	7.12	-1.06	0.478	0.000106	0.0029
80736	SLC44A4	solute carrier family 44 member 4 [Source:HGNC Symbol;Acc:HGNC:13941]	7.75	6.69	-1.06	0.478	0.000662	0.00774
6596	HLTF	helicase like transcription factor [Source:HGNC Symbol;Acc:HGNC:11099]	6.82	5.75	-1.07	0.478	0.0148	0.0483
3658	IREB2	iron responsive element binding protein 2 [Source:HGNC Symbol;Acc:HGNC:6115]	5	3.93	-1.07	0.477	4.25e-06	0.000543
57107	PDSS2	decaprenyl diphosphate synthase subunit 2 [Source:HGNC Symbol;Acc:HGNC:23041]	6.89	5.82	-1.07	0.477	0.00365	0.021
23064	SETX	senataxin [Source:HGNC Symbol;Acc:HGNC:445]	7.33	6.26	-1.07	0.477	3.84e-06	0.000536
9238	TBRG4	transforming growth factor beta regulator 4 [Source:HGNC Symbol;Acc:HGNC:17443]	6.74	5.67	-1.07	0.477	0.000162	0.00376
53373	TPCN1	two pore segment channel 1 [Source:HGNC Symbol;Acc:HGNC:18182]	7.39	6.32	-1.07	0.477	0.000342	0.00548
57418	WDR18	WD repeat domain 18 [Source:HGNC Symbol;Acc:HGNC:17956]	6.69	5.62	-1.07	0.477	0.00844	0.0345
22834	ZNF652	zinc finger protein 652 [Source:HGNC Symbol;Acc:HGNC:29147]	5.48	4.42	-1.07	0.477	0.0121	0.0428
63926	ANKEF1	ankyrin repeat and EF-hand domain containing 1 [Source:HGNC Symbol;Acc:HGNC:15803]	5	3.93	-1.07	0.476	0.000999	0.00983
23271	CAMSAP2	calmodulin regulated spectrin associated protein family member 2 [Source:HGNC Symbol;Acc:HGNC:29188]	7.12	6.05	-1.07	0.476	7.33e-05	0.00242
515	ATP5F1	ATP synthase, H+ transporting, mitochondrial Fo complex subunit B1 [Source:HGNC Symbol;Acc:HGNC:840]	11.2	10.2	-1.07	0.475	0.00083	0.00895
54955	C1orf109	chromosome 1 open reading frame 109 [Source:HGNC Symbol;Acc:HGNC:26039]	6.36	5.29	-1.07	0.475	0.00205	0.0151
4615	MYD88	myeloid differentiation primary response 88 [Source:HGNC Symbol;Acc:HGNC:7562]	10.6	9.49	-1.07	0.475	0.000968	0.00973
23376	UFL1	UFM1 specific ligase 1 [Source:HGNC Symbol;Acc:HGNC:23039]	7.76	6.69	-1.07	0.475	0.0021	0.0153
55100	WDR70	WD repeat domain 70 [Source:HGNC Symbol;Acc:HGNC:25495]	6.96	5.89	-1.07	0.475	0.000119	0.00311
10201	NME6	NME/NM23 nucleoside diphosphate kinase 6 [Source:HGNC Symbol;Acc:HGNC:20567]	6.68	5.61	-1.08	0.475	0.000923	0.00946
79670	ZCCHC6	zinc finger CCHC-type containing 6 [Source:HGNC Symbol;Acc:HGNC:25817]	7.73	6.65	-1.08	0.475	0.000395	0.00593
51454	GULP1	GULP, engulfment adaptor PTB domain containing 1 [Source:HGNC Symbol;Acc:HGNC:18649]	8.27	7.19	-1.08	0.474	0.00509	0.0256
90861	JPT2	Jupiter microtubule associated homolog 2 [Source:HGNC Symbol;Acc:HGNC:14137]	7.53	6.45	-1.08	0.474	2.95e-05	0.00148
64318	NOC3L	NOC3 like DNA replication regulator [Source:HGNC Symbol;Acc:HGNC:24034]	6.72	5.65	-1.08	0.474	0.00943	0.0368
5796	PTPRK	protein tyrosine phosphatase, receptor type K [Source:HGNC Symbol;Acc:HGNC:9674]	10.3	9.18	-1.08	0.474	0.00158	0.013
6903	TBCC	tubulin folding cofactor C [Source:HGNC Symbol;Acc:HGNC:11580]	8.22	7.14	-1.08	0.474	0.000256	0.00475
166647	ADGRA3	adhesion G protein-coupled receptor A3 [Source:HGNC Symbol;Acc:HGNC:13839]	5.56	4.48	-1.08	0.473	0.013	0.0446
51433	ANAPC5	anaphase promoting complex subunit 5 [Source:HGNC Symbol;Acc:HGNC:15713]	7.75	6.67	-1.08	0.473	0.000292	0.00503
5717	PSMD11	proteasome 26S subunit, non-ATPase 11 [Source:HGNC Symbol;Acc:HGNC:9556]	7.55	6.47	-1.08	0.473	2.18e-05	0.00126
60559	SPCS3	signal peptidase complex subunit 3 [Source:HGNC Symbol;Acc:HGNC:26212]	8.82	7.74	-1.08	0.473	0.000944	0.00959
54863	TOR4A	torsin family 4 member A [Source:HGNC Symbol;Acc:HGNC:25981]	7.88	6.8	-1.08	0.473	0.000231	0.00451
7443	VRK1	vaccinia related kinase 1 [Source:HGNC Symbol;Acc:HGNC:12718]	5.15	4.07	-1.08	0.473	0.000167	0.00382
2059	EPS8	epidermal growth factor receptor pathway substrate 8 [Source:HGNC Symbol;Acc:HGNC:3420]	10.2	9.08	-1.08	0.472	0.00703	0.0309
55756	INTS9	integrator complex subunit 9 [Source:HGNC Symbol;Acc:HGNC:25592]	5.48	4.39	-1.08	0.472	8.5e-05	0.0026
889	KRIT1	KRIT1, ankyrin repeat containing [Source:HGNC Symbol;Acc:HGNC:1573]	5.67	4.59	-1.08	0.472	2.49e-05	0.00136
53371	NUP54	nucleoporin 54 [Source:HGNC Symbol;Acc:HGNC:17359]	8.86	7.78	-1.08	0.472	0.000983	0.00976
8417	STX7	syntaxin 7 [Source:HGNC Symbol;Acc:HGNC:11442]	8.14	7.05	-1.08	0.472	0.00144	0.0124
7752	ZNF200	zinc finger protein 200 [Source:HGNC Symbol;Acc:HGNC:12993]	5.47	4.38	-1.08	0.472	0.000163	0.00376
8930	MBD4	methyl-CpG binding domain 4, DNA glycosylase [Source:HGNC Symbol;Acc:HGNC:6919]	7.94	6.85	-1.09	0.471	0.000217	0.00438
4534	MTM1	myotubularin 1 [Source:HGNC Symbol;Acc:HGNC:7448]	5.28	4.2	-1.09	0.471	7.81e-05	0.00249
10621	POLR3F	RNA polymerase III subunit F [Source:HGNC Symbol;Acc:HGNC:15763]	5.35	4.27	-1.09	0.471	0.00025	0.0047
5861	RAB1A	RAB1A, member RAS oncogene family [Source:HGNC Symbol;Acc:HGNC:9758]	8.96	7.87	-1.09	0.471	0.000426	0.00618
27289	RND1	Rho family GTPase 1 [Source:HGNC Symbol;Acc:HGNC:18314]	10.9	9.77	-1.09	0.471	0.0147	0.0481
11196	SEC23IP	SEC23 interacting protein [Source:HGNC Symbol;Acc:HGNC:17018]	7.06	5.98	-1.09	0.471	5.2e-05	0.00199
54802	TRIT1	tRNA isopentenyltransferase 1 [Source:HGNC Symbol;Acc:HGNC:20286]	6.58	5.5	-1.09	0.471	0.000657	0.00772
79020	C7orf25	chromosome 7 open reading frame 25 [Source:HGNC Symbol;Acc:HGNC:21703]	5.24	4.15	-1.09	0.47	0.000442	0.00629
124583	CANT1	calcium activated nucleotidase 1 [Source:HGNC Symbol;Acc:HGNC:19721]	8.88	7.79	-1.09	0.47	5.97e-05	0.00215
23326	USP22	ubiquitin specific peptidase 22 [Source:HGNC Symbol;Acc:HGNC:12621]	8.99	7.9	-1.09	0.47	0.000238	0.00457
9532	BAG2	BCL2 associated athanogene 2 [Source:HGNC Symbol;Acc:HGNC:938]	5.43	4.34	-1.09	0.469	0.00215	0.0155
51287	COA4	cytochrome c oxidase assembly factor 4 homolog [Source:HGNC Symbol;Acc:HGNC:24604]	8.82	7.73	-1.09	0.469	0.000406	0.00601
1736	DKC1	dyskerin pseudouridine synthase 1 [Source:HGNC Symbol;Acc:HGNC:2890]	7.61	6.52	-1.09	0.469	0.00107	0.0103
7978	MTERF1	mitochondrial transcription termination factor 1 [Source:HGNC Symbol;Acc:HGNC:21463]	6.29	5.2	-1.09	0.469	0.00034	0.00546
728344	NA	NA	5.79	4.7	-1.09	0.469	0.000427	0.00618
64897	C12orf43	chromosome 12 open reading frame 43 [Source:HGNC Symbol;Acc:HGNC:25719]	6.07	4.98	-1.09	0.468	0.000734	0.00823
9896	FIG4	FIG4 phosphoinositide 5-phosphatase [Source:HGNC Symbol;Acc:HGNC:16873]	7.4	6.3	-1.1	0.468	0.00446	0.0237
23366	KIAA0895	KIAA0895 [Source:HGNC Symbol;Acc:HGNC:22206]	4.76	3.66	-1.1	0.468	0.00133	0.0118
54948	MRPL16	mitochondrial ribosomal protein L16 [Source:HGNC Symbol;Acc:HGNC:14476]	8.13	7.03	-1.1	0.468	7.89e-05	0.00249
11311	VPS45	vacuolar protein sorting 45 homolog [Source:HGNC Symbol;Acc:HGNC:14579]	6.96	5.86	-1.1	0.468	0.00316	0.0193
1193	CLIC2	chloride intracellular channel 2 [Source:HGNC Symbol;Acc:HGNC:2063]	9.61	8.51	-1.1	0.467	0.00511	0.0256
1376	CPT2	carnitine palmitoyltransferase 2 [Source:HGNC Symbol;Acc:HGNC:2330]	6.77	5.67	-1.1	0.467	0.000198	0.00416
6605	SMARCE1	SWI/SNF related, matrix associated, actin dependent regulator of chromatin, subfamily e, member 1 [Source:HGNC Symbol;Acc:HGNC:11109]	8.83	7.73	-1.1	0.467	0.00747	0.032
56993	TOMM22	translocase of outer mitochondrial membrane 22 [Source:HGNC Symbol;Acc:HGNC:18002]	8.09	6.99	-1.1	0.467	0.000338	0.00546
327	APEH	acylaminoacyl-peptide hydrolase [Source:HGNC Symbol;Acc:HGNC:586]	7.41	6.3	-1.1	0.466	0.000624	0.00749
79577	CDC73	cell division cycle 73 [Source:HGNC Symbol;Acc:HGNC:16783]	7.99	6.89	-1.1	0.466	0.00519	0.026
8446	DUSP11	dual specificity phosphatase 11 [Source:HGNC Symbol;Acc:HGNC:3066]	8.82	7.72	-1.1	0.466	2.4e-05	0.00135
25801	GCA	grancalcin [Source:HGNC Symbol;Acc:HGNC:15990]	8.19	7.09	-1.1	0.466	0.00217	0.0156
8605	PLA2G4C	phospholipase A2 group IVC [Source:HGNC Symbol;Acc:HGNC:9037]	6.38	5.28	-1.1	0.466	0.00865	0.0349
7336	UBE2V2	ubiquitin conjugating enzyme E2 V2 [Source:HGNC Symbol;Acc:HGNC:12495]	9.45	8.35	-1.1	0.466	6.14e-05	0.00218
23325	WASHC4	WASH complex subunit 4 [Source:HGNC Symbol;Acc:HGNC:29174]	8.78	7.67	-1.1	0.466	3.24e-05	0.00151
54838	WBP1L	WW domain binding protein 1 like [Source:HGNC Symbol;Acc:HGNC:23510]	7.95	6.85	-1.1	0.466	0.000613	0.00747
55624	POMGNT1	protein O-linked mannose N-acetylglucosaminyltransferase 1 (beta 1,2-) [Source:HGNC Symbol;Acc:HGNC:19139]	7.36	6.26	-1.11	0.464	0.000508	0.00674
79029	SPATA5L1	spermatogenesis associated 5 like 1 [Source:HGNC Symbol;Acc:HGNC:28762]	6.93	5.82	-1.11	0.464	0.00295	0.0185
7520	XRCC5	X-ray repair cross complementing 5 [Source:HGNC Symbol;Acc:HGNC:12833]	9.72	8.61	-1.11	0.464	0.00117	0.0109
2582	GALE	UDP-galactose-4-epimerase [Source:HGNC Symbol;Acc:HGNC:4116]	8.7	7.58	-1.11	0.462	0.00133	0.0118
64747	MFSD1	major facilitator superfamily domain containing 1 [Source:HGNC Symbol;Acc:HGNC:25874]	9.84	8.72	-1.11	0.462	0.000336	0.00545
7110	TMF1	TATA element modulatory factor 1 [Source:HGNC Symbol;Acc:HGNC:11870]	7.3	6.19	-1.12	0.462	0.00279	0.0178
7168	TPM1	tropomyosin 1 [Source:HGNC Symbol;Acc:HGNC:12010]	9.9	8.79	-1.12	0.462	0.000268	0.00485
27063	ANKRD1	ankyrin repeat domain 1 [Source:HGNC Symbol;Acc:HGNC:15819]	9.78	8.67	-1.12	0.461	0.00294	0.0184
55435	AP1AR	adaptor related protein complex 1 associated regulatory protein [Source:HGNC Symbol;Acc:HGNC:28808]	6.73	5.62	-1.12	0.461	0.000403	0.006
2110	ETFDH	electron transfer flavoprotein dehydrogenase [Source:HGNC Symbol;Acc:HGNC:3483]	5.81	4.69	-1.12	0.461	0.000603	0.0074
7855	FZD5	frizzled class receptor 5 [Source:HGNC Symbol;Acc:HGNC:4043]	7.9	6.78	-1.12	0.461	0.000395	0.00593
2806	GOT2	glutamic-oxaloacetic transaminase 2 [Source:HGNC Symbol;Acc:HGNC:4433]	9.41	8.3	-1.12	0.461	0.000286	0.00497
5586	PKN2	protein kinase N2 [Source:HGNC Symbol;Acc:HGNC:9406]	8.39	7.28	-1.12	0.461	0.00237	0.0164
23683	PRKD3	protein kinase D3 [Source:HGNC Symbol;Acc:HGNC:9408]	7.11	5.99	-1.12	0.461	2.2e-05	0.00127
5705	PSMC5	proteasome 26S subunit, ATPase 5 [Source:HGNC Symbol;Acc:HGNC:9552]	9.36	8.24	-1.12	0.461	0.00255	0.0171
112611	RWDD2A	RWD domain containing 2A [Source:HGNC Symbol;Acc:HGNC:21385]	5.86	4.74	-1.12	0.461	0.000668	0.00774
8539	API5	apoptosis inhibitor 5 [Source:HGNC Symbol;Acc:HGNC:594]	6.62	5.49	-1.12	0.46	0.00278	0.0178
638	BIK	BCL2 interacting killer [Source:HGNC Symbol;Acc:HGNC:1051]	7.73	6.61	-1.12	0.46	0.000395	0.00593
23344	ESYT1	extended synaptotagmin 1 [Source:HGNC Symbol;Acc:HGNC:29534]	8.68	7.56	-1.12	0.46	1.98e-05	0.00121
29960	MRM2	mitochondrial rRNA methyltransferase 2 [Source:HGNC Symbol;Acc:HGNC:16352]	7.24	6.12	-1.12	0.46	0.007	0.0308
23137	SMC5	structural maintenance of chromosomes 5 [Source:HGNC Symbol;Acc:HGNC:20465]	6.38	5.26	-1.12	0.46	0.00246	0.0166
51643	TMBIM4	transmembrane BAX inhibitor motif containing 4 [Source:HGNC Symbol;Acc:HGNC:24257]	9.52	8.4	-1.12	0.46	0.000347	0.00552
64844	2017-03-07	membrane associated ring-CH-type finger 7 [Source:HGNC Symbol;Acc:HGNC:17393]	8.65	7.52	-1.12	0.459	1.52e-05	0.00106
4331	MNAT1	MNAT1, CDK activating kinase assembly factor [Source:HGNC Symbol;Acc:HGNC:7181]	7	5.88	-1.12	0.459	0.00279	0.0178
5499	PPP1CA	protein phosphatase 1 catalytic subunit alpha [Source:HGNC Symbol;Acc:HGNC:9281]	9.5	8.37	-1.12	0.459	0.000195	0.00412
9919	SEC16A	SEC16 homolog A, endoplasmic reticulum export factor [Source:HGNC Symbol;Acc:HGNC:29006]	7.42	6.29	-1.12	0.459	0.00976	0.0376
253461	ZBTB38	zinc finger and BTB domain containing 38 [Source:HGNC Symbol;Acc:HGNC:26636]	8.36	7.24	-1.12	0.459	0.00186	0.0143
51561	IL23A	interleukin 23 subunit alpha [Source:HGNC Symbol;Acc:HGNC:15488]	10.4	9.31	-1.13	0.459	0.00891	0.0355
840	CASP7	caspase 7 [Source:HGNC Symbol;Acc:HGNC:1508]	8.51	7.38	-1.13	0.458	1.52e-05	0.00106
9692	KIAA0391	KIAA0391 [Source:HGNC Symbol;Acc:HGNC:19958]	7.76	6.64	-1.13	0.458	0.000244	0.00465
54851	ANKRD49	ankyrin repeat domain 49 [Source:HGNC Symbol;Acc:HGNC:25970]	7.27	6.14	-1.13	0.457	0.000409	0.00604
8915	BCL10	B-cell CLL/lymphoma 10 [Source:HGNC Symbol;Acc:HGNC:989]	11	9.83	-1.13	0.457	3.18e-06	0.000525
54205	CYCS	cytochrome c, somatic [Source:HGNC Symbol;Acc:HGNC:19986]	10.8	9.68	-1.13	0.457	0.0024	0.0165
51106	TFB1M	transcription factor B1, mitochondrial [Source:HGNC Symbol;Acc:HGNC:17037]	7.29	6.16	-1.13	0.457	0.000956	0.00967
3655	ITGA6	integrin subunit alpha 6 [Source:HGNC Symbol;Acc:HGNC:6142]	7.35	6.22	-1.13	0.456	0.000107	0.00292
5469	MED1	mediator complex subunit 1 [Source:HGNC Symbol;Acc:HGNC:9234]	7.47	6.33	-1.13	0.456	0.000161	0.00374
55161	TMEM33	transmembrane protein 33 [Source:HGNC Symbol;Acc:HGNC:25541]	7.97	6.84	-1.13	0.456	2.99e-05	0.00148
55284	UBE2W	ubiquitin conjugating enzyme E2 W [Source:HGNC Symbol;Acc:HGNC:25616]	7.27	6.14	-1.13	0.456	0.00256	0.0171
93973	ACTR8	ARP8 actin related protein 8 homolog [Source:HGNC Symbol;Acc:HGNC:14672]	5.37	4.23	-1.14	0.455	2.38e-06	0.000462
1519	CTSO	cathepsin O [Source:HGNC Symbol;Acc:HGNC:2542]	9.27	8.13	-1.14	0.455	0.00266	0.0174
10419	PRMT5	protein arginine methyltransferase 5 [Source:HGNC Symbol;Acc:HGNC:10894]	9.04	7.9	-1.14	0.455	0.00137	0.012
29110	TBK1	TANK binding kinase 1 [Source:HGNC Symbol;Acc:HGNC:11584]	8.57	7.43	-1.14	0.455	0.000408	0.00603
79746	ECHDC3	enoyl-CoA hydratase domain containing 3 [Source:HGNC Symbol;Acc:HGNC:23489]	7.59	6.45	-1.14	0.454	0.0148	0.0483
3632	INPP5A	inositol polyphosphate-5-phosphatase A [Source:HGNC Symbol;Acc:HGNC:6076]	8.15	7.01	-1.14	0.454	0.0016	0.013
54778	RNF111	ring finger protein 111 [Source:HGNC Symbol;Acc:HGNC:17384]	8.17	7.03	-1.14	0.454	0.000251	0.00471
55623	THUMPD1	THUMP domain containing 1 [Source:HGNC Symbol;Acc:HGNC:23807]	8.47	7.33	-1.14	0.454	7.58e-05	0.00245
2739	GLO1	glyoxalase I [Source:HGNC Symbol;Acc:HGNC:4323]	10.2	9.02	-1.14	0.453	0.000544	0.007
6814	STXBP3	syntaxin binding protein 3 [Source:HGNC Symbol;Acc:HGNC:11446]	9.01	7.87	-1.14	0.453	8.52e-05	0.0026
9015	TAF1A	TATA-box binding protein associated factor, RNA polymerase I subunit A [Source:HGNC Symbol;Acc:HGNC:11532]	5.76	4.61	-1.14	0.453	0.00233	0.0162
64216	TFB2M	transcription factor B2, mitochondrial [Source:HGNC Symbol;Acc:HGNC:18559]	7.02	5.88	-1.14	0.453	9.22e-05	0.00271
55847	CISD1	CDGSH iron sulfur domain 1 [Source:HGNC Symbol;Acc:HGNC:30880]	10.4	9.22	-1.15	0.451	0.00761	0.0324
22796	COG2	component of oligomeric golgi complex 2 [Source:HGNC Symbol;Acc:HGNC:6546]	6.71	5.57	-1.15	0.451	0.000178	0.00393
79568	MAIP1	matrix AAA peptidase interacting protein 1 [Source:HGNC Symbol;Acc:HGNC:26198]	9.04	7.89	-1.15	0.451	4.76e-05	0.00191
5707	PSMD1	proteasome 26S subunit, non-ATPase 1 [Source:HGNC Symbol;Acc:HGNC:9554]	9.28	8.13	-1.15	0.451	0.000239	0.00458
54878	DPP8	dipeptidyl peptidase 8 [Source:HGNC Symbol;Acc:HGNC:16490]	9	7.85	-1.15	0.45	0.00454	0.0239
8487	GEMIN2	gem nuclear organelle associated protein 2 [Source:HGNC Symbol;Acc:HGNC:10884]	6.33	5.18	-1.15	0.45	4.62e-05	0.00188
51650	MRPS33	mitochondrial ribosomal protein S33 [Source:HGNC Symbol;Acc:HGNC:16634]	9.01	7.86	-1.15	0.45	0.000983	0.00976
26133	TRPC4AP	transient receptor potential cation channel subfamily C member 4 associated protein [Source:HGNC Symbol;Acc:HGNC:16181]	6.85	5.69	-1.15	0.45	0.000265	0.00482
79077	DCTPP1	dCTP pyrophosphatase 1 [Source:HGNC Symbol;Acc:HGNC:28777]	8.96	7.81	-1.15	0.449	0.00475	0.0246
55601	DDX60	DExD/H-box helicase 60 [Source:HGNC Symbol;Acc:HGNC:25942]	9.65	8.5	-1.15	0.449	0.0062	0.0286
55168	MRPS18A	mitochondrial ribosomal protein S18A [Source:HGNC Symbol;Acc:HGNC:14515]	7.79	6.64	-1.15	0.449	0.00387	0.0217
54981	NMRK1	nicotinamide riboside kinase 1 [Source:HGNC Symbol;Acc:HGNC:26057]	8.74	7.59	-1.15	0.449	9.06e-05	0.00269
705	BYSL	bystin like [Source:HGNC Symbol;Acc:HGNC:1157]	5.81	4.65	-1.16	0.448	0.000977	0.00975
55958	KLHL9	kelch like family member 9 [Source:HGNC Symbol;Acc:HGNC:18732]	7.27	6.11	-1.16	0.448	0.000665	0.00774
399979	SNX19	sorting nexin 19 [Source:HGNC Symbol;Acc:HGNC:21532]	6.78	5.62	-1.16	0.448	0.000884	0.00921
7247	TSN	translin [Source:HGNC Symbol;Acc:HGNC:12379]	7.15	5.99	-1.16	0.448	1.56e-05	0.00106
8615	USO1	USO1 vesicle transport factor [Source:HGNC Symbol;Acc:HGNC:30904]	8.23	7.08	-1.16	0.448	0.00149	0.0126
55717	WDR11	WD repeat domain 11 [Source:HGNC Symbol;Acc:HGNC:13831]	8.93	7.77	-1.16	0.448	0.00146	0.0125
86	ACTL6A	actin like 6A [Source:HGNC Symbol;Acc:HGNC:24124]	7.94	6.78	-1.16	0.447	0.00241	0.0165
10020	GNE	glucosamine (UDP-N-acetyl)-2-epimerase/N-acetylmannosamine kinase [Source:HGNC Symbol;Acc:HGNC:23657]	6.38	5.21	-1.16	0.447	0.00472	0.0245
10866	HCP5	HLA complex P5 (non-protein coding) [Source:HGNC Symbol;Acc:HGNC:21659]	8.52	7.36	-1.16	0.447	0.00158	0.013
51701	NLK	nemo like kinase [Source:HGNC Symbol;Acc:HGNC:29858]	6.5	5.33	-1.16	0.447	0.000233	0.00451
7411	VBP1	VHL binding protein 1 [Source:HGNC Symbol;Acc:HGNC:12662]	9.54	8.38	-1.16	0.447	0.00216	0.0156
23023	TMCC1	transmembrane and coiled-coil domain family 1 [Source:HGNC Symbol;Acc:HGNC:29116]	6.6	5.43	-1.16	0.446	8.2e-05	0.00255
9724	UTP14C	UTP14C, small subunit processome component [Source:HGNC Symbol;Acc:HGNC:20321]	7.12	5.95	-1.16	0.446	0.00574	0.0273
830	CAPZA2	capping actin protein of muscle Z-line alpha subunit 2 [Source:HGNC Symbol;Acc:HGNC:1490]	10.4	9.2	-1.17	0.446	1.42e-06	0.00037
55313	CPPED1	calcineurin like phosphoesterase domain containing 1 [Source:HGNC Symbol;Acc:HGNC:25632]	4.81	3.65	-1.17	0.446	3.04e-05	0.00148
2023	ENO1	enolase 1 [Source:HGNC Symbol;Acc:HGNC:3350]	12.6	11.4	-1.17	0.446	0.00121	0.0111
6787	NEK4	NIMA related kinase 4 [Source:HGNC Symbol;Acc:HGNC:11399]	7.81	6.64	-1.17	0.446	0.00605	0.0282
26190	FBXW2	F-box and WD repeat domain containing 2 [Source:HGNC Symbol;Acc:HGNC:13608]	7.47	6.3	-1.17	0.445	0.00405	0.0222
81839	VANGL1	VANGL planar cell polarity protein 1 [Source:HGNC Symbol;Acc:HGNC:15512]	5.09	3.92	-1.17	0.445	4.57e-05	0.00187
892	CCNC	cyclin C [Source:HGNC Symbol;Acc:HGNC:1581]	11.1	9.93	-1.17	0.444	0.000772	0.00851
1948	EFNB2	ephrin B2 [Source:HGNC Symbol;Acc:HGNC:3227]	6.56	5.39	-1.17	0.444	0.00597	0.028
23515	MORC3	MORC family CW-type zinc finger 3 [Source:HGNC Symbol;Acc:HGNC:23572]	9.17	8	-1.17	0.444	2.49e-05	0.00136
23286	WWC1	WW and C2 domain containing 1 [Source:HGNC Symbol;Acc:HGNC:29435]	6.97	5.8	-1.17	0.444	0.000468	0.00648
55148	UBR7	ubiquitin protein ligase E3 component n-recognin 7 (putative) [Source:HGNC Symbol;Acc:HGNC:20344]	6.18	5.01	-1.18	0.443	0.0113	0.0409
11056	DDX52	DExD-box helicase 52 [Source:HGNC Symbol;Acc:HGNC:20038]	5.5	4.32	-1.18	0.442	9.92e-05	0.00284
69	NA	NA	9.02	7.84	-1.18	0.442	0.0022	0.0157
9581	PREPL	prolyl endopeptidase-like [Source:HGNC Symbol;Acc:HGNC:30228]	6.29	5.11	-1.18	0.442	1.69e-05	0.00109
58477	SRPRB	SRP receptor beta subunit [Source:HGNC Symbol;Acc:HGNC:24085]	8.66	7.48	-1.18	0.442	0.00146	0.0125
6426	SRSF1	serine and arginine rich splicing factor 1 [Source:HGNC Symbol;Acc:HGNC:10780]	7.21	6.04	-1.18	0.442	0.00127	0.0115
55540	IL17RB	interleukin 17 receptor B [Source:HGNC Symbol;Acc:HGNC:18015]	7.07	5.88	-1.18	0.441	0.00365	0.021
28998	MRPL13	mitochondrial ribosomal protein L13 [Source:HGNC Symbol;Acc:HGNC:14278]	8.94	7.76	-1.18	0.441	0.000931	0.00949
29789	OLA1	Obg like ATPase 1 [Source:HGNC Symbol;Acc:HGNC:28833]	10.7	9.48	-1.18	0.441	0.000254	0.00474
55781	RIOK2	RIO kinase 2 [Source:HGNC Symbol;Acc:HGNC:18999]	8.11	6.93	-1.18	0.441	0.00827	0.0341
10772	SRSF10	serine and arginine rich splicing factor 10 [Source:HGNC Symbol;Acc:HGNC:16713]	7.99	6.81	-1.18	0.441	0.00323	0.0196
6741	SSB	Sjogren syndrome antigen B [Source:HGNC Symbol;Acc:HGNC:11316]	8.32	7.14	-1.18	0.441	0.00189	0.0144
26517	TIMM13	translocase of inner mitochondrial membrane 13 [Source:HGNC Symbol;Acc:HGNC:11816]	8.57	7.39	-1.18	0.441	0.000501	0.0067
11146	GLMN	glomulin, FKBP associated protein [Source:HGNC Symbol;Acc:HGNC:14373]	5.41	4.23	-1.18	0.44	0.00463	0.0242
10464	PIBF1	progesterone immunomodulatory binding factor 1 [Source:HGNC Symbol;Acc:HGNC:23352]	5.32	4.13	-1.18	0.44	5.69e-05	0.00209
51728	POLR3K	RNA polymerase III subunit K [Source:HGNC Symbol;Acc:HGNC:14121]	7.18	5.99	-1.18	0.44	0.00435	0.0233
55907	CMAS	cytidine monophosphate N-acetylneuraminic acid synthetase [Source:HGNC Symbol;Acc:HGNC:18290]	6.87	5.68	-1.19	0.44	0.000901	0.00932
7866	IFRD2	interferon related developmental regulator 2 [Source:HGNC Symbol;Acc:HGNC:5457]	7.85	6.66	-1.19	0.439	0.000181	0.00396
8073	PTP4A2	protein tyrosine phosphatase type IVA, member 2 [Source:HGNC Symbol;Acc:HGNC:9635]	11	9.8	-1.19	0.439	0.00591	0.0278
8934	RAB29	RAB29, member RAS oncogene family [Source:HGNC Symbol;Acc:HGNC:9789]	7.4	6.21	-1.19	0.439	0.000168	0.00382
22954	TRIM32	tripartite motif containing 32 [Source:HGNC Symbol;Acc:HGNC:16380]	6.64	5.45	-1.19	0.439	0.00113	0.0107
9559	VPS26A	VPS26, retromer complex component A [Source:HGNC Symbol;Acc:HGNC:12711]	10.5	9.31	-1.19	0.439	1.83e-05	0.00115
10782	ZNF274	zinc finger protein 274 [Source:HGNC Symbol;Acc:HGNC:13068]	6.89	5.7	-1.19	0.439	0.00299	0.0187
1024	CDK8	cyclin dependent kinase 8 [Source:HGNC Symbol;Acc:HGNC:1779]	7.93	6.74	-1.19	0.438	0.000127	0.00323
55027	HEATR3	HEAT repeat containing 3 [Source:HGNC Symbol;Acc:HGNC:26087]	5.25	4.05	-1.19	0.438	0.000957	0.00967
11183	MAP4K5	mitogen-activated protein kinase kinase kinase kinase 5 [Source:HGNC Symbol;Acc:HGNC:6867]	7.45	6.26	-1.19	0.438	0.000107	0.00291
10329	TMEM5	transmembrane protein 5 [Source:HGNC Symbol;Acc:HGNC:13530]	5.64	4.45	-1.19	0.438	0.000233	0.00451
10137	RBM12	RNA binding motif protein 12 [Source:HGNC Symbol;Acc:HGNC:9898]	6.81	5.61	-1.19	0.437	5.43e-05	0.00204
60561	RINT1	RAD50 interactor 1 [Source:HGNC Symbol;Acc:HGNC:21876]	7.2	6	-1.19	0.437	0.00145	0.0124
55905	RNF114	ring finger protein 114 [Source:HGNC Symbol;Acc:HGNC:13094]	9.92	8.72	-1.19	0.437	0.000225	0.00446
55008	HERC6	HECT and RLD domain containing E3 ubiquitin protein ligase family member 6 [Source:HGNC Symbol;Acc:HGNC:26072]	9.2	8	-1.2	0.437	0.00452	0.0239
23032	USP33	ubiquitin specific peptidase 33 [Source:HGNC Symbol;Acc:HGNC:20059]	7.72	6.52	-1.2	0.437	0.000126	0.00322
79135	APOO	apolipoprotein O [Source:HGNC Symbol;Acc:HGNC:28727]	8.77	7.57	-1.2	0.435	4.18e-05	0.00177
23234	DNAJC9	DnaJ heat shock protein family (Hsp40) member C9 [Source:HGNC Symbol;Acc:HGNC:19123]	7.18	5.98	-1.2	0.435	0.000207	0.00423
54502	RBM47	RNA binding motif protein 47 [Source:HGNC Symbol;Acc:HGNC:30358]	10.3	9.14	-1.2	0.435	0.000732	0.00823
8601	RGS20	regulator of G protein signaling 20 [Source:HGNC Symbol;Acc:HGNC:14600]	6.22	5.01	-1.2	0.435	0.00584	0.0276
23673	STX12	syntaxin 12 [Source:HGNC Symbol;Acc:HGNC:11430]	9.59	8.39	-1.2	0.435	2.12e-05	0.00126
151011	2017-09-10	septin 10 [Source:HGNC Symbol;Acc:HGNC:14349]	7.06	5.86	-1.2	0.434	8.67e-05	0.00261
55252	ASXL2	additional sex combs like 2, transcriptional regulator [Source:HGNC Symbol;Acc:HGNC:23805]	7.53	6.32	-1.2	0.434	0.00378	0.0214
55332	DRAM1	DNA damage regulated autophagy modulator 1 [Source:HGNC Symbol;Acc:HGNC:25645]	9.91	8.7	-1.2	0.434	0.0131	0.0447
22976	PAXIP1	PAX interacting protein 1 [Source:HGNC Symbol;Acc:HGNC:8624]	5.96	4.76	-1.21	0.434	0.000377	0.00579
7514	XPO1	exportin 1 [Source:HGNC Symbol;Acc:HGNC:12825]	10.1	8.9	-1.21	0.434	3.33e-05	0.00153
11130	ZWINT	ZW10 interacting kinetochore protein [Source:HGNC Symbol;Acc:HGNC:13195]	6.07	4.87	-1.21	0.434	0.000209	0.00427
10575	CCT4	chaperonin containing TCP1 subunit 4 [Source:HGNC Symbol;Acc:HGNC:1617]	10.9	9.74	-1.21	0.433	0.000532	0.00691
8939	FUBP3	far upstream element binding protein 3 [Source:HGNC Symbol;Acc:HGNC:4005]	8.48	7.27	-1.21	0.433	0.000133	0.0033
51031	GLOD4	glyoxalase domain containing 4 [Source:HGNC Symbol;Acc:HGNC:14111]	7.46	6.25	-1.21	0.433	0.000315	0.00529
10434	LYPLA1	lysophospholipase I [Source:HGNC Symbol;Acc:HGNC:6737]	10.6	9.4	-1.21	0.433	0.000116	0.00305
55052	MRPL20	mitochondrial ribosomal protein L20 [Source:HGNC Symbol;Acc:HGNC:14478]	10.2	8.97	-1.21	0.433	0.000206	0.00423
79622	SNRNP25	small nuclear ribonucleoprotein U11/U12 subunit 25 [Source:HGNC Symbol;Acc:HGNC:14161]	7.2	5.99	-1.21	0.433	1.43e-05	0.00106
9097	USP14	ubiquitin specific peptidase 14 [Source:HGNC Symbol;Acc:HGNC:12612]	9.58	8.37	-1.21	0.433	4.08e-06	0.000536
10212	DDX39A	DExD-box helicase 39A [Source:HGNC Symbol;Acc:HGNC:17821]	7.26	6.05	-1.21	0.432	0.0105	0.0392
4830	NME1	NME/NM23 nucleoside diphosphate kinase 1 [Source:HGNC Symbol;Acc:HGNC:7849]	10.2	9.03	-1.21	0.432	0.000964	0.00972
79902	NUP85	nucleoporin 85 [Source:HGNC Symbol;Acc:HGNC:8734]	7.11	5.9	-1.21	0.432	1.05e-05	0.000879
81031	SLC2A10	solute carrier family 2 member 10 [Source:HGNC Symbol;Acc:HGNC:13444]	6.3	5.09	-1.21	0.432	0.00152	0.0128
57707	TLDC1	TBC/LysM-associated domain containing 1 [Source:HGNC Symbol;Acc:HGNC:29325]	6.25	5.03	-1.21	0.431	5.68e-06	0.000628
1660	DHX9	DExH-box helicase 9 [Source:HGNC Symbol;Acc:HGNC:2750]	6.32	5.1	-1.22	0.43	0.000347	0.00552
54919	DNAAF5	dynein axonemal assembly factor 5 [Source:HGNC Symbol;Acc:HGNC:26013]	7.92	6.7	-1.22	0.43	1e-05	0.000859
2060	EPS15	epidermal growth factor receptor pathway substrate 15 [Source:HGNC Symbol;Acc:HGNC:3419]	8.55	7.33	-1.22	0.43	0.00119	0.011
28985	MCTS1	MCTS1, re-initiation and release factor [Source:HGNC Symbol;Acc:HGNC:23357]	9.74	8.52	-1.22	0.43	0.00174	0.0137
23165	NUP205	nucleoporin 205 [Source:HGNC Symbol;Acc:HGNC:18658]	8.1	6.88	-1.22	0.43	0.00175	0.0137
10016	PDCD6	programmed cell death 6 [Source:HGNC Symbol;Acc:HGNC:8765]	8.45	7.23	-1.22	0.43	0.000602	0.0074
5546	PRCC	papillary renal cell carcinoma (translocation-associated) [Source:HGNC Symbol;Acc:HGNC:9343]	5.79	4.57	-1.22	0.43	0.000383	0.00586
26750	RPS6KC1	ribosomal protein S6 kinase C1 [Source:HGNC Symbol;Acc:HGNC:10439]	7.15	5.93	-1.22	0.43	0.00274	0.0177
54433	GAR1	GAR1 ribonucleoprotein [Source:HGNC Symbol;Acc:HGNC:14264]	8.31	7.09	-1.22	0.429	0.00742	0.0319
55827	DCAF6	DDB1 and CUL4 associated factor 6 [Source:HGNC Symbol;Acc:HGNC:30002]	8.51	7.28	-1.22	0.428	7.44e-05	0.00243
51388	NIP7	NIP7, nucleolar pre-rRNA processing protein [Source:HGNC Symbol;Acc:HGNC:24328]	8.17	6.95	-1.22	0.428	2.15e-05	0.00126
874	CBR3	carbonyl reductase 3 [Source:HGNC Symbol;Acc:HGNC:1549]	8.43	7.2	-1.23	0.427	0.00279	0.0178
51805	COQ3	coenzyme Q3, methyltransferase [Source:HGNC Symbol;Acc:HGNC:18175]	6.75	5.52	-1.23	0.427	0.00371	0.0211
64430	PCNX4	pecanex homolog 4 [Source:HGNC Symbol;Acc:HGNC:20349]	5.51	4.29	-1.23	0.427	0.000474	0.00651
54664	TMEM106B	transmembrane protein 106B [Source:HGNC Symbol;Acc:HGNC:22407]	9.41	8.18	-1.23	0.427	0.00151	0.0127
23197	FAF2	Fas associated factor family member 2 [Source:HGNC Symbol;Acc:HGNC:24666]	8.33	7.1	-1.23	0.426	1.55e-05	0.00106
9373	PLAA	phospholipase A2 activating protein [Source:HGNC Symbol;Acc:HGNC:9043]	7.18	5.95	-1.23	0.426	1.51e-05	0.00106
22836	RHOBTB3	Rho related BTB domain containing 3 [Source:HGNC Symbol;Acc:HGNC:18757]	7.09	5.85	-1.23	0.426	0.00113	0.0107
7205	TRIP6	thyroid hormone receptor interactor 6 [Source:HGNC Symbol;Acc:HGNC:12311]	7.62	6.39	-1.23	0.426	0.000155	0.00366
10574	CCT7	chaperonin containing TCP1 subunit 7 [Source:HGNC Symbol;Acc:HGNC:1622]	9.72	8.49	-1.23	0.425	0.00156	0.0129
4300	MLLT3	MLLT3, super elongation complex subunit [Source:HGNC Symbol;Acc:HGNC:7136]	6.63	5.39	-1.23	0.425	0.0005	0.0067
23536	ADAT1	adenosine deaminase, tRNA specific 1 [Source:HGNC Symbol;Acc:HGNC:228]	6.22	4.98	-1.24	0.425	0.000902	0.00932
3613	IMPA2	inositol monophosphatase 2 [Source:HGNC Symbol;Acc:HGNC:6051]	8.58	7.35	-1.24	0.424	0.00465	0.0243
55703	POLR3B	RNA polymerase III subunit B [Source:HGNC Symbol;Acc:HGNC:30348]	6.63	5.39	-1.24	0.424	8.48e-05	0.0026
85363	TRIM5	tripartite motif containing 5 [Source:HGNC Symbol;Acc:HGNC:16276]	8.08	6.84	-1.24	0.424	0.00671	0.0301
57194	ATP10A	ATPase phospholipid transporting 10A (putative) [Source:HGNC Symbol;Acc:HGNC:13542]	6.82	5.58	-1.24	0.423	0.00188	0.0144
2071	ERCC3	ERCC excision repair 3, TFIIH core complex helicase subunit [Source:HGNC Symbol;Acc:HGNC:3435]	6.29	5.05	-1.24	0.423	7.15e-05	0.00239
7529	YWHAB	tyrosine 3-monooxygenase/tryptophan 5-monooxygenase activation protein beta [Source:HGNC Symbol;Acc:HGNC:12849]	11.1	9.86	-1.24	0.423	0.00113	0.0107
55145	THAP1	THAP domain containing 1 [Source:HGNC Symbol;Acc:HGNC:20856]	6.61	5.37	-1.24	0.422	3.42e-05	0.00155
57509	MTUS1	microtubule associated scaffold protein 1 [Source:HGNC Symbol;Acc:HGNC:29789]	8.25	7.01	-1.25	0.422	0.0038	0.0215
51651	PTRH2	peptidyl-tRNA hydrolase 2 [Source:HGNC Symbol;Acc:HGNC:24265]	8.95	7.7	-1.25	0.422	0.000292	0.00503
9886	RHOBTB1	Rho related BTB domain containing 1 [Source:HGNC Symbol;Acc:HGNC:18738]	5.12	3.88	-1.25	0.422	0.000116	0.00305
5987	TRIM27	tripartite motif containing 27 [Source:HGNC Symbol;Acc:HGNC:9975]	7.75	6.5	-1.25	0.422	2.83e-05	0.00147
9520	NPEPPS	aminopeptidase puromycin sensitive [Source:HGNC Symbol;Acc:HGNC:7900]	9.02	7.77	-1.25	0.421	1.2e-05	0.000948
28951	TRIB2	tribbles pseudokinase 2 [Source:HGNC Symbol;Acc:HGNC:30809]	7.6	6.35	-1.25	0.421	0.0052	0.026
51421	AMOTL2	angiomotin like 2 [Source:HGNC Symbol;Acc:HGNC:17812]	9.27	8.02	-1.25	0.42	0.0088	0.0353
22978	NT5C2	5'-nucleotidase, cytosolic II [Source:HGNC Symbol;Acc:HGNC:8022]	10.2	8.9	-1.25	0.42	4.15e-06	0.000536
390	RND3	Rho family GTPase 3 [Source:HGNC Symbol;Acc:HGNC:671]	12.6	11.3	-1.25	0.42	0.013	0.0446
31	ACACA	acetyl-CoA carboxylase alpha [Source:HGNC Symbol;Acc:HGNC:84]	7.63	6.38	-1.25	0.419	0.000249	0.0047
10197	PSME3	proteasome activator subunit 3 [Source:HGNC Symbol;Acc:HGNC:9570]	7.62	6.37	-1.25	0.419	0.000208	0.00424
7327	UBE2G2	ubiquitin conjugating enzyme E2 G2 [Source:HGNC Symbol;Acc:HGNC:12483]	6.88	5.63	-1.25	0.419	3.03e-05	0.00148
51118	UTP11	UTP11, small subunit processome component [Source:HGNC Symbol;Acc:HGNC:24329]	8.95	7.69	-1.25	0.419	0.000567	0.00719
55279	ZNF654	zinc finger protein 654 [Source:HGNC Symbol;Acc:HGNC:25612]	6.8	5.55	-1.25	0.419	0.000343	0.00548
55909	BIN3	bridging integrator 3 [Source:HGNC Symbol;Acc:HGNC:1054]	7.42	6.17	-1.26	0.419	0.000106	0.00291
55763	EXOC1	exocyst complex component 1 [Source:HGNC Symbol;Acc:HGNC:30380]	8.58	7.33	-1.26	0.419	0.000228	0.0045
51735	RAPGEF6	Rap guanine nucleotide exchange factor 6 [Source:HGNC Symbol;Acc:HGNC:20655]	6.61	5.35	-1.26	0.419	3.57e-05	0.00158
54407	SLC38A2	solute carrier family 38 member 2 [Source:HGNC Symbol;Acc:HGNC:13448]	10.3	9.02	-1.26	0.417	0.0155	0.0498
63826	SRR	serine racemase [Source:HGNC Symbol;Acc:HGNC:14398]	6.14	4.88	-1.26	0.417	5.55e-05	0.00207
64149	C17orf75	chromosome 17 open reading frame 75 [Source:HGNC Symbol;Acc:HGNC:30173]	7.46	6.2	-1.27	0.416	0.000621	0.00749
8443	GNPAT	glyceronephosphate O-acyltransferase [Source:HGNC Symbol;Acc:HGNC:4416]	9.45	8.18	-1.27	0.416	0.00106	0.0103
2926	GRSF1	G-rich RNA sequence binding factor 1 [Source:HGNC Symbol;Acc:HGNC:4610]	8.17	6.91	-1.27	0.416	2.39e-06	0.000462
6674	SPAG1	sperm associated antigen 1 [Source:HGNC Symbol;Acc:HGNC:11212]	6.14	4.87	-1.27	0.416	0.00189	0.0144
57763	ANKRA2	ankyrin repeat family A member 2 [Source:HGNC Symbol;Acc:HGNC:13208]	8.41	7.14	-1.27	0.415	0.000257	0.00475
708	C1QBP	complement C1q binding protein [Source:HGNC Symbol;Acc:HGNC:1243]	10.4	9.13	-1.27	0.415	0.000527	0.00688
9652	TTC37	tetratricopeptide repeat domain 37 [Source:HGNC Symbol;Acc:HGNC:23639]	7.97	6.7	-1.27	0.415	0.00256	0.0171
25998	IBTK	inhibitor of Bruton tyrosine kinase [Source:HGNC Symbol;Acc:HGNC:17853]	9.31	8.04	-1.27	0.414	0.000668	0.00774
55930	MYO5C	myosin VC [Source:HGNC Symbol;Acc:HGNC:7604]	8.04	6.76	-1.27	0.414	0.00545	0.0265
10987	COPS5	COP9 signalosome subunit 5 [Source:HGNC Symbol;Acc:HGNC:2240]	9.5	8.23	-1.28	0.413	0.00148	0.0125
54148	MRPL39	mitochondrial ribosomal protein L39 [Source:HGNC Symbol;Acc:HGNC:14027]	8.82	7.54	-1.28	0.413	5.66e-05	0.00209
663	BNIP2	BCL2 interacting protein 2 [Source:HGNC Symbol;Acc:HGNC:1083]	8.65	7.37	-1.28	0.412	7.89e-05	0.00249
1969	EPHA2	EPH receptor A2 [Source:HGNC Symbol;Acc:HGNC:3386]	7.92	6.64	-1.28	0.412	0.00423	0.0229
5281	PIGF	phosphatidylinositol glycan anchor biosynthesis class F [Source:HGNC Symbol;Acc:HGNC:8962]	8.08	6.8	-1.28	0.412	0.0117	0.0418
90627	STARD13	StAR related lipid transfer domain containing 13 [Source:HGNC Symbol;Acc:HGNC:19164]	6.41	5.13	-1.28	0.412	3.48e-05	0.00156
64288	ZSCAN31	zinc finger and SCAN domain containing 31 [Source:HGNC Symbol;Acc:HGNC:14097]	5.64	4.37	-1.28	0.412	0.00037	0.00574
11215	AKAP11	A-kinase anchoring protein 11 [Source:HGNC Symbol;Acc:HGNC:369]	8	6.71	-1.28	0.411	9.78e-05	0.00283
1977	EIF4E	eukaryotic translation initiation factor 4E [Source:HGNC Symbol;Acc:HGNC:3287]	6.95	5.67	-1.28	0.411	2.42e-05	0.00135
9527	GOSR1	golgi SNAP receptor complex member 1 [Source:HGNC Symbol;Acc:HGNC:4430]	7.47	6.19	-1.28	0.411	2.52e-05	0.00136
2968	GTF2H4	general transcription factor IIH subunit 4 [Source:HGNC Symbol;Acc:HGNC:4658]	5.39	4.11	-1.28	0.411	7.43e-05	0.00243
3033	HADH	hydroxyacyl-CoA dehydrogenase [Source:HGNC Symbol;Acc:HGNC:4799]	7.73	6.45	-1.28	0.411	0.000941	0.00958
23424	TDRD7	tudor domain containing 7 [Source:HGNC Symbol;Acc:HGNC:30831]	8.38	7.09	-1.28	0.411	0.0031	0.0191
51375	SNX7	sorting nexin 7 [Source:HGNC Symbol;Acc:HGNC:14971]	9.39	8.1	-1.28	0.41	0.00605	0.0282
6347	CCL2	C-C motif chemokine ligand 2 [Source:HGNC Symbol;Acc:HGNC:10618]	13.5	12.2	-1.29	0.41	0.0131	0.0447
5264	PHYH	phytanoyl-CoA 2-hydroxylase [Source:HGNC Symbol;Acc:HGNC:8940]	8.45	7.16	-1.29	0.41	0.00349	0.0205
54665	RSBN1	round spermatid basic protein 1 [Source:HGNC Symbol;Acc:HGNC:25642]	7.07	5.79	-1.29	0.41	0.000586	0.00727
50485	SMARCAL1	SWI/SNF related, matrix associated, actin dependent regulator of chromatin, subfamily a like 1 [Source:HGNC Symbol;Acc:HGNC:11102]	7.47	6.19	-1.29	0.41	0.000164	0.00379
55120	FANCL	Fanconi anemia complementation group L [Source:HGNC Symbol;Acc:HGNC:20748]	6.85	5.56	-1.29	0.409	0.000126	0.00322
8690	JRKL	JRK like [Source:HGNC Symbol;Acc:HGNC:6200]	6.06	4.77	-1.29	0.409	0.000451	0.00634
9533	POLR1C	RNA polymerase I subunit C [Source:HGNC Symbol;Acc:HGNC:20194]	6.8	5.51	-1.29	0.409	0.0014	0.0122
8089	YEATS4	YEATS domain containing 4 [Source:HGNC Symbol;Acc:HGNC:24859]	5.75	4.46	-1.29	0.409	0.00157	0.013
23741	EID1	EP300 interacting inhibitor of differentiation 1 [Source:HGNC Symbol;Acc:HGNC:1191]	8.24	6.95	-1.29	0.408	0.00285	0.0181
3692	EIF6	eukaryotic translation initiation factor 6 [Source:HGNC Symbol;Acc:HGNC:6159]	10.3	8.99	-1.29	0.408	0.000791	0.00866
5860	QDPR	quinoid dihydropteridine reductase [Source:HGNC Symbol;Acc:HGNC:9752]	8.58	7.29	-1.29	0.408	0.00366	0.021
9711	RUBCN	RUN and cysteine rich domain containing beclin 1 interacting protein [Source:HGNC Symbol;Acc:HGNC:28991]	7.43	6.13	-1.29	0.408	8.33e-05	0.00258
54505	DHX29	DExH-box helicase 29 [Source:HGNC Symbol;Acc:HGNC:15815]	7.35	6.05	-1.3	0.407	0.000445	0.0063
6921	ELOC	elongin C [Source:HGNC Symbol;Acc:HGNC:11617]	8.9	7.61	-1.3	0.407	3.51e-05	0.00157
9801	MRPL19	mitochondrial ribosomal protein L19 [Source:HGNC Symbol;Acc:HGNC:14052]	9.01	7.71	-1.3	0.407	0.000605	0.0074
55251	PCMTD2	protein-L-isoaspartate (D-aspartate) O-methyltransferase domain containing 2 [Source:HGNC Symbol;Acc:HGNC:15882]	6.88	5.58	-1.3	0.407	0.000117	0.00306
10856	RUVBL2	RuvB like AAA ATPase 2 [Source:HGNC Symbol;Acc:HGNC:10475]	8.04	6.74	-1.3	0.407	0.000104	0.00288
22908	SACM1L	SAC1 like phosphatidylinositide phosphatase [Source:HGNC Symbol;Acc:HGNC:17059]	8.63	7.34	-1.3	0.407	0.00628	0.0289
6747	SSR3	signal sequence receptor subunit 3 [Source:HGNC Symbol;Acc:HGNC:11325]	7.03	5.73	-1.3	0.407	0.000577	0.00721
7716	VEZF1	vascular endothelial zinc finger 1 [Source:HGNC Symbol;Acc:HGNC:12949]	8.14	6.85	-1.3	0.407	0.00135	0.0119
2764	GMFB	glia maturation factor beta [Source:HGNC Symbol;Acc:HGNC:4373]	9.73	8.43	-1.3	0.406	0.00028	0.00494
3190	HNRNPK	heterogeneous nuclear ribonucleoprotein K [Source:HGNC Symbol;Acc:HGNC:5044]	11.7	10.4	-1.3	0.406	0.000175	0.0039
80013	MINDY3	MINDY lysine 48 deubiquitinase 3 [Source:HGNC Symbol;Acc:HGNC:23578]	6.61	5.31	-1.3	0.406	7.21e-06	0.00068
54700	RRN3	RRN3 homolog, RNA polymerase I transcription factor [Source:HGNC Symbol;Acc:HGNC:30346]	8.22	6.92	-1.3	0.406	1.48e-05	0.00106
8100	IFT88	intraflagellar transport 88 [Source:HGNC Symbol;Acc:HGNC:20606]	6.41	5.1	-1.31	0.404	0.000321	0.00533
92342	METTL18	methyltransferase like 18 [Source:HGNC Symbol;Acc:HGNC:28793]	5.98	4.67	-1.31	0.404	0.000356	0.00559
64759	TNS3	tensin 3 [Source:HGNC Symbol;Acc:HGNC:21616]	8.97	7.67	-1.31	0.404	0.000917	0.00943
51019	WASHC3	WASH complex subunit 3 [Source:HGNC Symbol;Acc:HGNC:24256]	9.07	7.76	-1.31	0.404	0.00569	0.0272
1984	EIF5A	eukaryotic translation initiation factor 5A [Source:HGNC Symbol;Acc:HGNC:3300]	10.1	8.84	-1.31	0.403	0.00208	0.0152
9929	JOSD1	Josephin domain containing 1 [Source:HGNC Symbol;Acc:HGNC:28953]	9.74	8.42	-1.31	0.403	3.07e-05	0.00148
79003	MIS12	MIS12, kinetochore complex component [Source:HGNC Symbol;Acc:HGNC:24967]	7.59	6.27	-1.32	0.402	0.000287	0.00498
23394	ADNP	activity dependent neuroprotector homeobox [Source:HGNC Symbol;Acc:HGNC:15766]	7.78	6.46	-1.32	0.401	3.48e-06	0.000525
51309	ARMCX1	armadillo repeat containing, X-linked 1 [Source:HGNC Symbol;Acc:HGNC:18073]	8.56	7.24	-1.32	0.401	0.00255	0.0171
22948	CCT5	chaperonin containing TCP1 subunit 5 [Source:HGNC Symbol;Acc:HGNC:1618]	10.4	9.12	-1.32	0.401	0.00117	0.0109
378708	CENPS	centromere protein S [Source:HGNC Symbol;Acc:HGNC:23163]	5.83	4.51	-1.32	0.401	1.36e-05	0.00104
23332	CLASP1	cytoplasmic linker associated protein 1 [Source:HGNC Symbol;Acc:HGNC:17088]	7.7	6.38	-1.32	0.401	2.47e-05	0.00136
9328	GTF3C5	general transcription factor IIIC subunit 5 [Source:HGNC Symbol;Acc:HGNC:4668]	6.43	5.11	-1.32	0.401	4.95e-05	0.00195
84549	MAK16	MAK16 homolog [Source:HGNC Symbol;Acc:HGNC:13703]	7.46	6.14	-1.32	0.401	0.000233	0.00451
4528	MTIF2	mitochondrial translational initiation factor 2 [Source:HGNC Symbol;Acc:HGNC:7441]	8.32	7	-1.32	0.401	0.00133	0.0118
5686	PSMA5	proteasome subunit alpha 5 [Source:HGNC Symbol;Acc:HGNC:9534]	10.4	9.1	-1.32	0.401	0.00109	0.0104
9184	BUB3	BUB3, mitotic checkpoint protein [Source:HGNC Symbol;Acc:HGNC:1151]	8.85	7.53	-1.32	0.4	8.97e-06	0.000786
8065	CUL5	cullin 5 [Source:HGNC Symbol;Acc:HGNC:2556]	7	5.68	-1.32	0.4	5.28e-05	0.00199
9538	EI24	EI24, autophagy associated transmembrane protein [Source:HGNC Symbol;Acc:HGNC:13276]	9.36	8.04	-1.32	0.4	0.000908	0.00936
9526	MPDU1	mannose-P-dolichol utilization defect 1 [Source:HGNC Symbol;Acc:HGNC:7207]	8.76	7.44	-1.32	0.4	0.0013	0.0116
9889	ZBED4	zinc finger BED-type containing 4 [Source:HGNC Symbol;Acc:HGNC:20721]	6.26	4.94	-1.32	0.399	5.99e-05	0.00215
23379	ICE1	interactor of little elongation complex ELL subunit 1 [Source:HGNC Symbol;Acc:HGNC:29154]	6.9	5.58	-1.33	0.399	6.12e-05	0.00217
51001	MTERF3	mitochondrial transcription termination factor 3 [Source:HGNC Symbol;Acc:HGNC:24258]	7.84	6.52	-1.33	0.399	0.0137	0.0462
56995	TULP4	tubby like protein 4 [Source:HGNC Symbol;Acc:HGNC:15530]	6.44	5.12	-1.33	0.398	4.5e-05	0.00186
306	ANXA3	annexin A3 [Source:HGNC Symbol;Acc:HGNC:541]	11.2	9.89	-1.33	0.397	0.00218	0.0156
526	ATP6V1B2	ATPase H+ transporting V1 subunit B2 [Source:HGNC Symbol;Acc:HGNC:854]	10.8	9.47	-1.33	0.397	0.0026	0.0172
3052	HCCS	holocytochrome c synthase [Source:HGNC Symbol;Acc:HGNC:4837]	8.46	7.13	-1.33	0.397	0.000175	0.0039
51155	JPT1	Jupiter microtubule associated homolog 1 [Source:HGNC Symbol;Acc:HGNC:14569]	9.65	8.32	-1.33	0.397	0.000326	0.00539
80723	SLC35G2	solute carrier family 35 member G2 [Source:HGNC Symbol;Acc:HGNC:28480]	6.4	5.07	-1.33	0.397	0.00277	0.0178
10617	STAMBP	STAM binding protein [Source:HGNC Symbol;Acc:HGNC:16950]	8.03	6.7	-1.33	0.397	0.000231	0.00451
23585	TMEM50A	transmembrane protein 50A [Source:HGNC Symbol;Acc:HGNC:30590]	9.54	8.21	-1.33	0.397	3.14e-05	0.0015
8895	CPNE3	copine 3 [Source:HGNC Symbol;Acc:HGNC:2316]	9.26	7.92	-1.34	0.395	2.82e-06	0.000488
23283	CSTF2T	cleavage stimulation factor subunit 2 tau variant [Source:HGNC Symbol;Acc:HGNC:17086]	6.07	4.73	-1.34	0.395	4.97e-05	0.00195
9842	PLEKHM1	pleckstrin homology and RUN domain containing M1 [Source:HGNC Symbol;Acc:HGNC:29017]	8.91	7.57	-1.34	0.395	6.54e-05	0.00225
23198	PSME4	proteasome activator subunit 4 [Source:HGNC Symbol;Acc:HGNC:20635]	8.04	6.7	-1.34	0.395	8.81e-06	0.000777
10778	ZNF271P	zinc finger protein 271, pseudogene [Source:HGNC Symbol;Acc:HGNC:13065]	6.35	5.01	-1.34	0.395	0.0144	0.0475
23172	ABRAXAS2	abraxas 2, BRISC complex subunit [Source:HGNC Symbol;Acc:HGNC:28975]	7.13	5.79	-1.34	0.394	8.36e-06	0.000754
3028	HSD17B10	hydroxysteroid 17-beta dehydrogenase 10 [Source:HGNC Symbol;Acc:HGNC:4800]	9.13	7.79	-1.35	0.393	0.000356	0.00558
23304	UBR2	ubiquitin protein ligase E3 component n-recognin 2 [Source:HGNC Symbol;Acc:HGNC:21289]	6.98	5.63	-1.35	0.393	0.000264	0.00482
57050	UTP3	UTP3, small subunit processome component [Source:HGNC Symbol;Acc:HGNC:24477]	8.1	6.75	-1.35	0.392	0.000247	0.00467
54872	PIGG	phosphatidylinositol glycan anchor biosynthesis class G [Source:HGNC Symbol;Acc:HGNC:25985]	7.32	5.97	-1.35	0.391	0.00062	0.00749
29071	C1GALT1C1	C1GALT1 specific chaperone 1 [Source:HGNC Symbol;Acc:HGNC:24338]	9.15	7.79	-1.36	0.391	5.16e-05	0.00199
2444	FRK	fyn related Src family tyrosine kinase [Source:HGNC Symbol;Acc:HGNC:3955]	5.67	4.32	-1.36	0.391	4.53e-05	0.00186
80204	FBXO11	F-box protein 11 [Source:HGNC Symbol;Acc:HGNC:13590]	7.5	6.14	-1.36	0.39	0.00253	0.017
254394	MCM9	minichromosome maintenance 9 homologous recombination repair factor [Source:HGNC Symbol;Acc:HGNC:21484]	5.79	4.43	-1.36	0.39	0.000201	0.00418
64943	NT5DC2	5'-nucleotidase domain containing 2 [Source:HGNC Symbol;Acc:HGNC:25717]	6.16	4.8	-1.36	0.39	0.000499	0.00669
8723	SNX4	sorting nexin 4 [Source:HGNC Symbol;Acc:HGNC:11175]	7.71	6.35	-1.36	0.39	1.86e-05	0.00116
54811	ZNF562	zinc finger protein 562 [Source:HGNC Symbol;Acc:HGNC:25950]	6.25	4.9	-1.36	0.39	2.81e-05	0.00147
64860	ARMCX5	armadillo repeat containing, X-linked 5 [Source:HGNC Symbol;Acc:HGNC:25772]	6.72	5.36	-1.36	0.389	8.89e-07	0.000287
79605	PGBD5	piggyBac transposable element derived 5 [Source:HGNC Symbol;Acc:HGNC:19405]	6.85	5.49	-1.36	0.389	0.0122	0.0428
51075	TMX2	thioredoxin related transmembrane protein 2 [Source:HGNC Symbol;Acc:HGNC:30739]	9.28	7.92	-1.36	0.389	0.000631	0.00754
6737	TRIM21	tripartite motif containing 21 [Source:HGNC Symbol;Acc:HGNC:11312]	7.58	6.22	-1.36	0.389	0.000308	0.0052
55720	TSR1	TSR1, ribosome maturation factor [Source:HGNC Symbol;Acc:HGNC:25542]	6.2	4.84	-1.36	0.389	6.1e-06	0.000656
2021	ENDOG	endonuclease G [Source:HGNC Symbol;Acc:HGNC:3346]	7.09	5.73	-1.36	0.388	0.00217	0.0156
55193	PBRM1	polybromo 1 [Source:HGNC Symbol;Acc:HGNC:30064]	7.77	6.41	-1.36	0.388	0.000102	0.00287
79888	LPCAT1	lysophosphatidylcholine acyltransferase 1 [Source:HGNC Symbol;Acc:HGNC:25718]	7.98	6.61	-1.37	0.387	0.00165	0.0133
26046	LTN1	listerin E3 ubiquitin protein ligase 1 [Source:HGNC Symbol;Acc:HGNC:13082]	8.01	6.63	-1.37	0.387	0.00285	0.0181
9521	EEF1E1	eukaryotic translation elongation factor 1 epsilon 1 [Source:HGNC Symbol;Acc:HGNC:3212]	8.54	7.16	-1.37	0.386	1.56e-05	0.00106
10531	PITRM1	pitrilysin metallopeptidase 1 [Source:HGNC Symbol;Acc:HGNC:17663]	8.39	7.01	-1.37	0.386	0.00497	0.0253
10346	TRIM22	tripartite motif containing 22 [Source:HGNC Symbol;Acc:HGNC:16379]	11	9.6	-1.37	0.386	0.000256	0.00475
22911	WDR47	WD repeat domain 47 [Source:HGNC Symbol;Acc:HGNC:29141]	7.71	6.34	-1.37	0.386	0.00147	0.0125
23300	ATMIN	ATM interactor [Source:HGNC Symbol;Acc:HGNC:29034]	7.9	6.52	-1.38	0.385	1.44e-05	0.00106
9870	AREL1	apoptosis resistant E3 ubiquitin protein ligase 1 [Source:HGNC Symbol;Acc:HGNC:20363]	7.86	6.48	-1.38	0.384	0.000865	0.0091
29880	ALG5	ALG5, dolichyl-phosphate beta-glucosyltransferase [Source:HGNC Symbol;Acc:HGNC:20266]	9.46	8.08	-1.38	0.383	3.64e-06	0.000531
56954	NIT2	nitrilase family member 2 [Source:HGNC Symbol;Acc:HGNC:29878]	9.56	8.17	-1.38	0.383	0.00211	0.0153
66036	MTMR9	myotubularin related protein 9 [Source:HGNC Symbol;Acc:HGNC:14596]	7.75	6.36	-1.39	0.383	3.86e-06	0.000536
55005	RMND1	required for meiotic nuclear division 1 homolog [Source:HGNC Symbol;Acc:HGNC:21176]	6.12	4.73	-1.39	0.383	0.000157	0.00367
375035	SFT2D2	SFT2 domain containing 2 [Source:HGNC Symbol;Acc:HGNC:25140]	8.44	7.05	-1.39	0.382	0.000282	0.00495
81539	SLC38A1	solute carrier family 38 member 1 [Source:HGNC Symbol;Acc:HGNC:13447]	8.65	7.26	-1.39	0.382	0.00752	0.0321
9529	BAG5	BCL2 associated athanogene 5 [Source:HGNC Symbol;Acc:HGNC:941]	8.11	6.72	-1.39	0.381	0.000169	0.00384
51719	CAB39	calcium binding protein 39 [Source:HGNC Symbol;Acc:HGNC:20292]	10.1	8.67	-1.39	0.381	3.05e-05	0.00148
81875	ISG20L2	interferon stimulated exonuclease gene 20 like 2 [Source:HGNC Symbol;Acc:HGNC:25745]	6.74	5.35	-1.39	0.381	0.000126	0.00322
5711	PSMD5	proteasome 26S subunit, non-ATPase 5 [Source:HGNC Symbol;Acc:HGNC:9563]	7.98	6.58	-1.39	0.381	9.61e-05	0.0028
23350	U2SURP	U2 snRNP associated SURP domain containing [Source:HGNC Symbol;Acc:HGNC:30855]	6.78	5.39	-1.39	0.381	1.96e-06	0.000437
10072	DPP3	dipeptidyl peptidase 3 [Source:HGNC Symbol;Acc:HGNC:3008]	7.34	5.94	-1.4	0.38	0.000445	0.0063
54842	MFSD6	major facilitator superfamily domain containing 6 [Source:HGNC Symbol;Acc:HGNC:24711]	6.31	4.92	-1.4	0.38	0.000195	0.00412
79053	ALG8	ALG8, alpha-1,3-glucosyltransferase [Source:HGNC Symbol;Acc:HGNC:23161]	7.87	6.47	-1.4	0.379	0.000416	0.00609
7290	HIRA	histone cell cycle regulator [Source:HGNC Symbol;Acc:HGNC:4916]	7.18	5.78	-1.4	0.379	8.03e-05	0.00252
3840	KPNA4	karyopherin subunit alpha 4 [Source:HGNC Symbol;Acc:HGNC:6397]	7.27	5.87	-1.4	0.379	0.00509	0.0256
10213	PSMD14	proteasome 26S subunit, non-ATPase 14 [Source:HGNC Symbol;Acc:HGNC:16889]	11.2	9.83	-1.4	0.379	3.79e-05	0.00164
9861	PSMD6	proteasome 26S subunit, non-ATPase 6 [Source:HGNC Symbol;Acc:HGNC:9564]	10	8.61	-1.4	0.379	9.04e-05	0.00269
81537	SGPP1	sphingosine-1-phosphate phosphatase 1 [Source:HGNC Symbol;Acc:HGNC:17720]	6.81	5.41	-1.4	0.379	0.000282	0.00495
3182	HNRNPAB	heterogeneous nuclear ribonucleoprotein A/B [Source:HGNC Symbol;Acc:HGNC:5034]	9.9	8.5	-1.4	0.378	0.00337	0.0201
29104	N6AMT1	N-6 adenine-specific DNA methyltransferase 1 (putative) [Source:HGNC Symbol;Acc:HGNC:16021]	5.7	4.3	-1.4	0.378	3e-05	0.00148
152559	PAQR3	progestin and adipoQ receptor family member 3 [Source:HGNC Symbol;Acc:HGNC:30130]	5.9	4.5	-1.4	0.378	0.000703	0.00802
23186	RCOR1	REST corepressor 1 [Source:HGNC Symbol;Acc:HGNC:17441]	8.2	6.8	-1.4	0.378	0.000405	0.00601
28978	TMEM14A	transmembrane protein 14A [Source:HGNC Symbol;Acc:HGNC:21076]	9.85	8.45	-1.4	0.378	0.00129	0.0116
1479	CSTF3	cleavage stimulation factor subunit 3 [Source:HGNC Symbol;Acc:HGNC:2485]	8.12	6.71	-1.41	0.377	2.62e-05	0.0014
285527	FRYL	FRY like transcription coactivator [Source:HGNC Symbol;Acc:HGNC:29127]	7.72	6.31	-1.41	0.377	8.55e-05	0.0026
23788	MTCH2	mitochondrial carrier 2 [Source:HGNC Symbol;Acc:HGNC:17587]	9.66	8.25	-1.41	0.377	1.44e-05	0.00106
5701	PSMC2	proteasome 26S subunit, ATPase 2 [Source:HGNC Symbol;Acc:HGNC:9548]	7.15	5.74	-1.41	0.377	0.000648	0.00768
55508	SLC35E3	solute carrier family 35 member E3 [Source:HGNC Symbol;Acc:HGNC:20864]	7.54	6.13	-1.41	0.376	1.62e-05	0.00108
3376	IARS	isoleucyl-tRNA synthetase [Source:HGNC Symbol;Acc:HGNC:5330]	9.39	7.97	-1.41	0.375	0.00568	0.0272
10463	SLC30A9	solute carrier family 30 member 9 [Source:HGNC Symbol;Acc:HGNC:1329]	8.82	7.4	-1.41	0.375	0.000457	0.00638
55364	IMPACT	impact RWD domain protein [Source:HGNC Symbol;Acc:HGNC:20387]	6.65	5.24	-1.42	0.375	0.000696	0.00796
80349	WDR61	WD repeat domain 61 [Source:HGNC Symbol;Acc:HGNC:30300]	8.09	6.67	-1.42	0.375	0.000114	0.00304
51703	ACSL5	acyl-CoA synthetase long chain family member 5 [Source:HGNC Symbol;Acc:HGNC:16526]	8.18	6.76	-1.42	0.374	0.000576	0.00721
8301	PICALM	phosphatidylinositol binding clathrin assembly protein [Source:HGNC Symbol;Acc:HGNC:15514]	7.64	6.22	-1.42	0.374	6.64e-06	0.000656
11182	SLC2A6	solute carrier family 2 member 6 [Source:HGNC Symbol;Acc:HGNC:11011]	8.04	6.62	-1.42	0.374	0.00286	0.0181
55236	UBA6	ubiquitin like modifier activating enzyme 6 [Source:HGNC Symbol;Acc:HGNC:25581]	7.59	6.17	-1.42	0.374	0.00184	0.0142
54521	WDR44	WD repeat domain 44 [Source:HGNC Symbol;Acc:HGNC:30512]	7.11	5.69	-1.42	0.374	0.000273	0.0049
51809	GALNT7	polypeptide N-acetylgalactosaminyltransferase 7 [Source:HGNC Symbol;Acc:HGNC:4129]	8.71	7.29	-1.42	0.373	0.00156	0.0129
7098	TLR3	toll like receptor 3 [Source:HGNC Symbol;Acc:HGNC:11849]	8.34	6.92	-1.42	0.373	0.0105	0.039
1407	CRY1	cryptochrome circadian clock 1 [Source:HGNC Symbol;Acc:HGNC:2384]	8.6	7.18	-1.43	0.372	0.000872	0.00914
7813	EVI5	ecotropic viral integration site 5 [Source:HGNC Symbol;Acc:HGNC:3501]	7.61	6.18	-1.43	0.372	8.13e-05	0.00254
3035	HARS	histidyl-tRNA synthetase [Source:HGNC Symbol;Acc:HGNC:4816]	8.63	7.21	-1.43	0.372	0.00458	0.0241
5096	PCCB	propionyl-CoA carboxylase beta subunit [Source:HGNC Symbol;Acc:HGNC:8654]	8.21	6.78	-1.43	0.372	0.00448	0.0238
26608	TBL2	transducin beta like 2 [Source:HGNC Symbol;Acc:HGNC:11586]	8.59	7.17	-1.43	0.372	7.39e-05	0.00243
348995	NUP43	nucleoporin 43 [Source:HGNC Symbol;Acc:HGNC:21182]	8.07	6.64	-1.43	0.371	2.8e-05	0.00147
51022	GLRX2	glutaredoxin 2 [Source:HGNC Symbol;Acc:HGNC:16065]	9.36	7.92	-1.43	0.37	5.04e-06	0.000595
79691	QTRT2	queuine tRNA-ribosyltransferase accessory subunit 2 [Source:HGNC Symbol;Acc:HGNC:25771]	5.7	4.27	-1.43	0.37	0.000106	0.0029
11137	PWP1	PWP1 homolog, endonuclein [Source:HGNC Symbol;Acc:HGNC:17015]	8.69	7.26	-1.44	0.37	0.000157	0.00367
57019	CIAPIN1	cytokine induced apoptosis inhibitor 1 [Source:HGNC Symbol;Acc:HGNC:28050]	7.52	6.08	-1.44	0.369	0.000525	0.00687
6632	SNRPD1	small nuclear ribonucleoprotein D1 polypeptide [Source:HGNC Symbol;Acc:HGNC:11158]	7.77	6.33	-1.44	0.369	2.88e-05	0.00147
9330	GTF3C3	general transcription factor IIIC subunit 3 [Source:HGNC Symbol;Acc:HGNC:4666]	7.49	6.05	-1.44	0.368	0.000721	0.00816
51601	LIPT1	lipoyltransferase 1 [Source:HGNC Symbol;Acc:HGNC:29569]	6.09	4.65	-1.44	0.368	4.71e-05	0.0019
4234	METTL1	methyltransferase like 1 [Source:HGNC Symbol;Acc:HGNC:7030]	6.88	5.44	-1.44	0.368	0.00197	0.0148
7257	TSNAX	translin associated factor X [Source:HGNC Symbol;Acc:HGNC:12380]	8.76	7.32	-1.44	0.368	0.00032	0.00533
57472	CNOT6	CCR4-NOT transcription complex subunit 6 [Source:HGNC Symbol;Acc:HGNC:14099]	7.82	6.38	-1.44	0.367	1.36e-06	0.000364
1147	CHUK	conserved helix-loop-helix ubiquitous kinase [Source:HGNC Symbol;Acc:HGNC:1974]	7.61	6.17	-1.45	0.367	0.00325	0.0196
1906	EDN1	endothelin 1 [Source:HGNC Symbol;Acc:HGNC:3176]	9.69	8.25	-1.45	0.367	1.65e-05	0.00108
5684	PSMA3	proteasome subunit alpha 3 [Source:HGNC Symbol;Acc:HGNC:9532]	11.2	9.71	-1.45	0.367	0.00221	0.0157
2395	FXN	frataxin [Source:HGNC Symbol;Acc:HGNC:3951]	5.23	3.78	-1.45	0.366	3.46e-05	0.00156
26136	TES	testin LIM domain protein [Source:HGNC Symbol;Acc:HGNC:14620]	9.53	8.08	-1.45	0.366	0.000975	0.00975
51377	UCHL5	ubiquitin C-terminal hydrolase L5 [Source:HGNC Symbol;Acc:HGNC:19678]	7.12	5.67	-1.45	0.366	0.000275	0.0049
6018	RLF	rearranged L-myc fusion [Source:HGNC Symbol;Acc:HGNC:10025]	7.71	6.25	-1.45	0.365	0.00603	0.0281
51011	FAHD2A	fumarylacetoacetate hydrolase domain containing 2A [Source:HGNC Symbol;Acc:HGNC:24252]	5.83	4.37	-1.46	0.365	0.000622	0.00749
113	ADCY7	adenylate cyclase 7 [Source:HGNC Symbol;Acc:HGNC:238]	6.82	5.36	-1.46	0.364	0.00173	0.0136
9946	CRYZL1	crystallin zeta like 1 [Source:HGNC Symbol;Acc:HGNC:2420]	6.44	4.98	-1.46	0.364	0.0011	0.0105
1655	DDX5	DEAD-box helicase 5 [Source:HGNC Symbol;Acc:HGNC:2746]	11.5	10	-1.46	0.364	3.44e-06	0.000525
5702	PSMC3	proteasome 26S subunit, ATPase 3 [Source:HGNC Symbol;Acc:HGNC:9549]	8.35	6.89	-1.46	0.364	0.000936	0.00954
4086	SMAD1	SMAD family member 1 [Source:HGNC Symbol;Acc:HGNC:6767]	7.35	5.89	-1.46	0.364	0.00891	0.0355
11103	KRR1	KRR1, small subunit processome component homolog [Source:HGNC Symbol;Acc:HGNC:5176]	7.38	5.92	-1.46	0.363	3.15e-06	0.000525
6873	TAF2	TATA-box binding protein associated factor 2 [Source:HGNC Symbol;Acc:HGNC:11536]	8.58	7.12	-1.46	0.363	5.84e-05	0.00213
55293	UEVLD	UEV and lactate/malate dehyrogenase domains [Source:HGNC Symbol;Acc:HGNC:30866]	6.85	5.39	-1.46	0.363	0.000235	0.00453
158	ADSL	adenylosuccinate lyase [Source:HGNC Symbol;Acc:HGNC:291]	8.53	7.07	-1.47	0.362	0.000387	0.00589
57003	CCDC47	coiled-coil domain containing 47 [Source:HGNC Symbol;Acc:HGNC:24856]	7.54	6.07	-1.47	0.361	0.000599	0.00738
8799	PEX11B	peroxisomal biogenesis factor 11 beta [Source:HGNC Symbol;Acc:HGNC:8853]	7.98	6.51	-1.47	0.361	0.000372	0.00574
22845	DOLK	dolichol kinase [Source:HGNC Symbol;Acc:HGNC:23406]	6.97	5.5	-1.47	0.36	0.00017	0.00384
80007	C10orf88	chromosome 10 open reading frame 88 [Source:HGNC Symbol;Acc:HGNC:25822]	6.13	4.66	-1.48	0.36	1.09e-05	0.000893
9759	HDAC4	histone deacetylase 4 [Source:HGNC Symbol;Acc:HGNC:14063]	5.63	4.16	-1.48	0.36	1.69e-05	0.00109
79572	ATP13A3	ATPase 13A3 [Source:HGNC Symbol;Acc:HGNC:24113]	8.77	7.3	-1.48	0.359	2.02e-05	0.00123
2287	FKBP3	FK506 binding protein 3 [Source:HGNC Symbol;Acc:HGNC:3719]	9.66	8.18	-1.48	0.359	0.00086	0.00908
80155	NAA15	N(alpha)-acetyltransferase 15, NatA auxiliary subunit [Source:HGNC Symbol;Acc:HGNC:30782]	7.94	6.46	-1.48	0.358	0.000426	0.00618
9949	AMMECR1	Alport syndrome, mental retardation, midface hypoplasia and elliptocytosis chromosomal region gene 1 [Source:HGNC Symbol;Acc:HGNC:467]	7.92	6.43	-1.49	0.357	0.000631	0.00754
27236	ARFIP1	ADP ribosylation factor interacting protein 1 [Source:HGNC Symbol;Acc:HGNC:21496]	7.09	5.6	-1.49	0.357	0.000316	0.00529
25940	FAM98A	family with sequence similarity 98 member A [Source:HGNC Symbol;Acc:HGNC:24520]	8.02	6.54	-1.49	0.357	0.00307	0.019
91137	SLC25A46	solute carrier family 25 member 46 [Source:HGNC Symbol;Acc:HGNC:25198]	8.63	7.15	-1.49	0.357	0.00328	0.0198
6882	TAF11	TATA-box binding protein associated factor 11 [Source:HGNC Symbol;Acc:HGNC:11544]	8.35	6.86	-1.49	0.357	3.12e-05	0.00149
55858	TMEM165	transmembrane protein 165 [Source:HGNC Symbol;Acc:HGNC:30760]	10.1	8.6	-1.49	0.357	0.000587	0.00728
9354	UBE4A	ubiquitination factor E4A [Source:HGNC Symbol;Acc:HGNC:12499]	9.14	7.65	-1.49	0.357	4.74e-06	0.000576
7743	ZNF189	zinc finger protein 189 [Source:HGNC Symbol;Acc:HGNC:12980]	7.57	6.08	-1.49	0.357	7.06e-05	0.00237
80323	CCDC68	coiled-coil domain containing 68 [Source:HGNC Symbol;Acc:HGNC:24350]	6.69	5.2	-1.49	0.356	0.000482	0.0066
4430	MYO1B	myosin IB [Source:HGNC Symbol;Acc:HGNC:7596]	11.4	9.92	-1.49	0.356	7.47e-06	0.000694
10528	NOP56	NOP56 ribonucleoprotein [Source:HGNC Symbol;Acc:HGNC:15911]	8.31	6.82	-1.49	0.356	0.00138	0.0121
51112	TRAPPC12	trafficking protein particle complex 12 [Source:HGNC Symbol;Acc:HGNC:24284]	7.15	5.66	-1.49	0.356	0.00116	0.0109
7390	UROS	uroporphyrinogen III synthase [Source:HGNC Symbol;Acc:HGNC:12592]	7.86	6.37	-1.49	0.356	0.000529	0.00689
51182	HSPA14	heat shock protein family A (Hsp70) member 14 [Source:HGNC Symbol;Acc:HGNC:29526]	7.13	5.64	-1.49	0.355	0.000372	0.00574
53340	SPA17	sperm autoantigenic protein 17 [Source:HGNC Symbol;Acc:HGNC:11210]	7.05	5.56	-1.49	0.355	0.0056	0.027
466	ATF1	activating transcription factor 1 [Source:HGNC Symbol;Acc:HGNC:783]	8.44	6.94	-1.5	0.354	0.000504	0.00671
23333	DPY19L1	dpy-19 like 1 [Source:HGNC Symbol;Acc:HGNC:22205]	7.58	6.08	-1.5	0.354	0.00218	0.0156
4232	MEST	mesoderm specific transcript [Source:HGNC Symbol;Acc:HGNC:7028]	8.17	6.67	-1.5	0.354	0.00219	0.0156
10146	G3BP1	G3BP stress granule assembly factor 1 [Source:HGNC Symbol;Acc:HGNC:30292]	8.8	7.3	-1.5	0.353	7.18e-06	0.00068
23200	ATP11B	ATPase phospholipid transporting 11B (putative) [Source:HGNC Symbol;Acc:HGNC:13553]	8.16	6.66	-1.51	0.352	1.82e-05	0.00115
7559	ZNF12	zinc finger protein 12 [Source:HGNC Symbol;Acc:HGNC:12902]	6.53	5.02	-1.51	0.352	8.86e-05	0.00266
4692	NDN	necdin, MAGE family member [Source:HGNC Symbol;Acc:HGNC:7675]	7.97	6.47	-1.51	0.351	0.000437	0.00626
54463	RETREG1	reticulophagy regulator 1 [Source:HGNC Symbol;Acc:HGNC:25964]	6.49	4.98	-1.51	0.351	0.00225	0.0159
10376	TUBA1B	tubulin alpha 1b [Source:HGNC Symbol;Acc:HGNC:18809]	12.9	11.4	-1.51	0.351	8.7e-06	0.000774
55759	WDR12	WD repeat domain 12 [Source:HGNC Symbol;Acc:HGNC:14098]	8.91	7.4	-1.51	0.351	0.000426	0.00618
7748	ZNF195	zinc finger protein 195 [Source:HGNC Symbol;Acc:HGNC:12986]	6.32	4.81	-1.51	0.351	0.000424	0.00617
10659	CELF2	CUGBP Elav-like family member 2 [Source:HGNC Symbol;Acc:HGNC:2550]	8.73	7.21	-1.51	0.35	6.09e-05	0.00217
55003	PAK1IP1	PAK1 interacting protein 1 [Source:HGNC Symbol;Acc:HGNC:20882]	6.9	5.39	-1.51	0.35	1.91e-05	0.00119
9604	RNF14	ring finger protein 14 [Source:HGNC Symbol;Acc:HGNC:10058]	8.03	6.52	-1.51	0.35	1.48e-06	0.00037
8803	SUCLA2	succinate-CoA ligase ADP-forming beta subunit [Source:HGNC Symbol;Acc:HGNC:11448]	7.71	6.2	-1.51	0.35	0.00263	0.0173
23560	GTPBP4	GTP binding protein 4 [Source:HGNC Symbol;Acc:HGNC:21535]	8.4	6.88	-1.52	0.349	6.09e-07	0.000268
51115	RMDN1	regulator of microtubule dynamics 1 [Source:HGNC Symbol;Acc:HGNC:24285]	8.28	6.76	-1.52	0.349	5.62e-06	0.000627
54832	VPS13C	vacuolar protein sorting 13 homolog C [Source:HGNC Symbol;Acc:HGNC:23594]	8.77	7.25	-1.52	0.349	0.000886	0.00922
1962	EHHADH	enoyl-CoA hydratase and 3-hydroxyacyl CoA dehydrogenase [Source:HGNC Symbol;Acc:HGNC:3247]	5.74	4.22	-1.52	0.348	6.96e-05	0.00235
64108	RTP4	receptor transporter protein 4 [Source:HGNC Symbol;Acc:HGNC:23992]	8.4	6.88	-1.52	0.348	0.000133	0.0033
9039	UBA3	ubiquitin like modifier activating enzyme 3 [Source:HGNC Symbol;Acc:HGNC:12470]	9.16	7.63	-1.53	0.347	1.09e-05	0.000893
27235	COQ2	coenzyme Q2, polyprenyltransferase [Source:HGNC Symbol;Acc:HGNC:25223]	7.2	5.66	-1.53	0.345	4.36e-05	0.00182
51340	CRNKL1	crooked neck pre-mRNA splicing factor 1 [Source:HGNC Symbol;Acc:HGNC:15762]	5.93	4.39	-1.53	0.345	5.92e-06	0.000648
23341	DNAJC16	DnaJ heat shock protein family (Hsp40) member C16 [Source:HGNC Symbol;Acc:HGNC:29157]	6.47	4.93	-1.54	0.345	1.83e-06	0.000426
54962	TIPIN	TIMELESS interacting protein [Source:HGNC Symbol;Acc:HGNC:30750]	6.36	4.82	-1.54	0.344	0.000224	0.00446
1967	EIF2B1	eukaryotic translation initiation factor 2B subunit alpha [Source:HGNC Symbol;Acc:HGNC:3257]	7.77	6.23	-1.54	0.343	0.000336	0.00545
5162	PDHB	pyruvate dehydrogenase (lipoamide) beta [Source:HGNC Symbol;Acc:HGNC:8808]	9.57	8.03	-1.54	0.343	0.000176	0.0039
9821	RB1CC1	RB1 inducible coiled-coil 1 [Source:HGNC Symbol;Acc:HGNC:15574]	8.29	6.74	-1.54	0.343	0.000321	0.00533
23517	SKIV2L2	Ski2 like RNA helicase 2 [Source:HGNC Symbol;Acc:HGNC:18734]	7.71	6.16	-1.55	0.343	0.000318	0.00532
157567	ANKRD46	ankyrin repeat domain 46 [Source:HGNC Symbol;Acc:HGNC:27229]	6.19	4.65	-1.55	0.342	0.000305	0.00519
23107	MRPS27	mitochondrial ribosomal protein S27 [Source:HGNC Symbol;Acc:HGNC:14512]	7.4	5.86	-1.55	0.342	0.00041	0.00605
10135	NAMPT	nicotinamide phosphoribosyltransferase [Source:HGNC Symbol;Acc:HGNC:30092]	10.5	8.99	-1.55	0.342	0.00133	0.0118
5378	PMS1	PMS1 homolog 1, mismatch repair system component [Source:HGNC Symbol;Acc:HGNC:9121]	5.85	4.3	-1.55	0.342	5.23e-06	0.0006
55032	SLC35A5	solute carrier family 35 member A5 [Source:HGNC Symbol;Acc:HGNC:20792]	7.82	6.27	-1.55	0.342	0.000659	0.00774
10269	ZMPSTE24	zinc metallopeptidase STE24 [Source:HGNC Symbol;Acc:HGNC:12877]	10	8.45	-1.55	0.342	2.87e-05	0.00147
51495	HACD3	3-hydroxyacyl-CoA dehydratase 3 [Source:HGNC Symbol;Acc:HGNC:24175]	8.52	6.97	-1.55	0.341	0.000103	0.00287
55127	HEATR1	HEAT repeat containing 1 [Source:HGNC Symbol;Acc:HGNC:25517]	7.29	5.74	-1.55	0.341	7.65e-06	0.000695
100287932	TIMM23	translocase of inner mitochondrial membrane 23 [Source:HGNC Symbol;Acc:HGNC:17312]	8.52	6.97	-1.55	0.341	0.000746	0.00832
29760	BLNK	B-cell linker [Source:HGNC Symbol;Acc:HGNC:14211]	7.25	5.7	-1.56	0.34	0.00993	0.0379
51141	INSIG2	insulin induced gene 2 [Source:HGNC Symbol;Acc:HGNC:20452]	8.79	7.23	-1.56	0.34	0.0002	0.00418
5289	PIK3C3	phosphatidylinositol 3-kinase catalytic subunit type 3 [Source:HGNC Symbol;Acc:HGNC:8974]	8.36	6.8	-1.56	0.34	1.65e-05	0.00108
55379	LRRC59	leucine rich repeat containing 59 [Source:HGNC Symbol;Acc:HGNC:28817]	10.1	8.5	-1.56	0.339	7.68e-05	0.00247
7203	CCT3	chaperonin containing TCP1 subunit 3 [Source:HGNC Symbol;Acc:HGNC:1616]	10.5	8.94	-1.57	0.337	6.76e-05	0.00229
1434	CSE1L	chromosome segregation 1 like [Source:HGNC Symbol;Acc:HGNC:2431]	8.35	6.78	-1.57	0.337	0.000191	0.0041
9324	HMGN3	high mobility group nucleosomal binding domain 3 [Source:HGNC Symbol;Acc:HGNC:12312]	10.5	8.96	-1.57	0.337	0.00099	0.00979
3673	ITGA2	integrin subunit alpha 2 [Source:HGNC Symbol;Acc:HGNC:6137]	11.6	10	-1.57	0.337	1.08e-06	0.000305
56902	PNO1	partner of NOB1 homolog [Source:HGNC Symbol;Acc:HGNC:32790]	8.57	7	-1.57	0.337	0.000582	0.00725
22884	WDR37	WD repeat domain 37 [Source:HGNC Symbol;Acc:HGNC:31406]	7.22	5.65	-1.57	0.337	0.000223	0.00446
307	ANXA4	annexin A4 [Source:HGNC Symbol;Acc:HGNC:542]	10	8.43	-1.57	0.336	0.00141	0.0122
9836	LCMT2	leucine carboxyl methyltransferase 2 [Source:HGNC Symbol;Acc:HGNC:17558]	6.9	5.32	-1.58	0.335	0.00126	0.0114
10775	NA	NA	9.4	7.82	-1.58	0.335	0.000252	0.00471
55833	UBAP2	ubiquitin associated protein 2 [Source:HGNC Symbol;Acc:HGNC:14185]	8.21	6.63	-1.58	0.335	4.33e-05	0.00182
51449	PCYOX1	prenylcysteine oxidase 1 [Source:HGNC Symbol;Acc:HGNC:20588]	6.83	5.25	-1.58	0.334	2.55e-06	0.000462
29909	GPR171	G protein-coupled receptor 171 [Source:HGNC Symbol;Acc:HGNC:30057]	5.54	3.95	-1.59	0.332	0.0014	0.0122
26275	HIBCH	3-hydroxyisobutyryl-CoA hydrolase [Source:HGNC Symbol;Acc:HGNC:4908]	6.52	4.93	-1.59	0.332	0.000206	0.00423
93487	MAPK1IP1L	mitogen-activated protein kinase 1 interacting protein 1 like [Source:HGNC Symbol;Acc:HGNC:19840]	9.07	7.48	-1.59	0.332	4.94e-06	0.000588
5591	PRKDC	protein kinase, DNA-activated, catalytic polypeptide [Source:HGNC Symbol;Acc:HGNC:9413]	6.54	4.95	-1.59	0.332	3.4e-06	0.000525
55106	SLFN12	schlafen family member 12 [Source:HGNC Symbol;Acc:HGNC:25500]	5.72	4.12	-1.59	0.331	1.14e-05	0.000923
10492	SYNCRIP	synaptotagmin binding cytoplasmic RNA interacting protein [Source:HGNC Symbol;Acc:HGNC:16918]	7.74	6.14	-1.59	0.331	2.52e-05	0.00136
25780	RASGRP3	RAS guanyl releasing protein 3 [Source:HGNC Symbol;Acc:HGNC:14545]	6.1	4.5	-1.6	0.33	4.53e-05	0.00186
9525	VPS4B	vacuolar protein sorting 4 homolog B [Source:HGNC Symbol;Acc:HGNC:10895]	9.13	7.53	-1.6	0.33	4.74e-06	0.000576
51626	DYNC2LI1	dynein cytoplasmic 2 light intermediate chain 1 [Source:HGNC Symbol;Acc:HGNC:24595]	6.55	4.95	-1.6	0.329	0.000126	0.00322
2965	GTF2H1	general transcription factor IIH subunit 1 [Source:HGNC Symbol;Acc:HGNC:4655]	6.52	4.91	-1.61	0.328	0.000112	0.003
10128	LRPPRC	leucine rich pentatricopeptide repeat containing [Source:HGNC Symbol;Acc:HGNC:15714]	7.76	6.15	-1.61	0.328	0.00129	0.0116
9107	MTMR6	myotubularin related protein 6 [Source:HGNC Symbol;Acc:HGNC:7453]	9.09	7.49	-1.61	0.328	0.000171	0.00385
26278	SACS	sacsin molecular chaperone [Source:HGNC Symbol;Acc:HGNC:10519]	6.09	4.48	-1.61	0.328	9.3e-05	0.00273
83481	EPPK1	epiplakin 1 [Source:HGNC Symbol;Acc:HGNC:15577]	8.19	6.58	-1.61	0.327	0.0136	0.046
2960	GTF2E1	general transcription factor IIE subunit 1 [Source:HGNC Symbol;Acc:HGNC:4650]	7.64	6.03	-1.61	0.327	0.00106	0.0103
11282	MGAT4B	mannosyl (alpha-1,3-)-glycoprotein beta-1,4-N-acetylglucosaminyltransferase, isozyme B [Source:HGNC Symbol;Acc:HGNC:7048]	8.49	6.87	-1.61	0.327	0.00115	0.0108
23395	LARS2	leucyl-tRNA synthetase 2, mitochondrial [Source:HGNC Symbol;Acc:HGNC:17095]	6.61	4.99	-1.62	0.326	6.55e-06	0.000656
3396	MRPL58	mitochondrial ribosomal protein L58 [Source:HGNC Symbol;Acc:HGNC:5359]	8.43	6.81	-1.62	0.326	0.00204	0.0151
5935	RBM3	RNA binding motif (RNP1, RRM) protein 3 [Source:HGNC Symbol;Acc:HGNC:9900]	8.82	7.2	-1.62	0.326	2.81e-05	0.00147
79134	TMEM185B	transmembrane protein 185B [Source:HGNC Symbol;Acc:HGNC:18896]	6.69	5.08	-1.62	0.326	3.51e-06	0.000525
55192	DNAJC17	DnaJ heat shock protein family (Hsp40) member C17 [Source:HGNC Symbol;Acc:HGNC:25556]	5.33	3.71	-1.62	0.325	3.38e-05	0.00155
23708	GSPT2	G1 to S phase transition 2 [Source:HGNC Symbol;Acc:HGNC:4622]	6.62	5	-1.62	0.325	4.49e-06	0.000561
9180	OSMR	oncostatin M receptor [Source:HGNC Symbol;Acc:HGNC:8507]	6.4	4.78	-1.62	0.325	1.63e-05	0.00108
79038	ZFYVE21	zinc finger FYVE-type containing 21 [Source:HGNC Symbol;Acc:HGNC:20760]	7.3	5.68	-1.62	0.325	0.00021	0.00427
6399	TRAPPC2	trafficking protein particle complex 2 [Source:HGNC Symbol;Acc:HGNC:23068]	6.57	4.94	-1.63	0.324	7.53e-06	0.000694
7718	ZNF165	zinc finger protein 165 [Source:HGNC Symbol;Acc:HGNC:12953]	7.93	6.3	-1.63	0.323	0.000286	0.00497
1070	CETN3	centrin 3 [Source:HGNC Symbol;Acc:HGNC:1868]	9.26	7.62	-1.63	0.322	0.00102	0.00997
8323	FZD6	frizzled class receptor 6 [Source:HGNC Symbol;Acc:HGNC:4044]	8.32	6.69	-1.63	0.322	2.2e-06	0.00045
4247	MGAT2	mannosyl (alpha-1,6-)-glycoprotein beta-1,2-N-acetylglucosaminyltransferase [Source:HGNC Symbol;Acc:HGNC:7045]	7.83	6.2	-1.63	0.322	5.92e-05	0.00214
60488	MRPS35	mitochondrial ribosomal protein S35 [Source:HGNC Symbol;Acc:HGNC:16635]	8.84	7.21	-1.64	0.322	0.000175	0.0039
80223	RAB11FIP1	RAB11 family interacting protein 1 [Source:HGNC Symbol;Acc:HGNC:30265]	10.9	9.26	-1.64	0.321	1.83e-05	0.00115
6374	CXCL5	C-X-C motif chemokine ligand 5 [Source:HGNC Symbol;Acc:HGNC:10642]	13.1	11.5	-1.64	0.32	0.00771	0.0326
3001	GZMA	granzyme A [Source:HGNC Symbol;Acc:HGNC:4708]	5.86	4.22	-1.64	0.32	0.000423	0.00617
79803	HPS6	HPS6, biogenesis of lysosomal organelles complex 2 subunit 3 [Source:HGNC Symbol;Acc:HGNC:18817]	7.52	5.87	-1.64	0.32	0.000496	0.00668
4927	NUP88	nucleoporin 88 [Source:HGNC Symbol;Acc:HGNC:8067]	8.63	6.98	-1.64	0.32	0.0019	0.0145
9325	TRIP4	thyroid hormone receptor interactor 4 [Source:HGNC Symbol;Acc:HGNC:12310]	8.93	7.29	-1.64	0.32	6.44e-07	0.000268
8625	RFXANK	regulatory factor X associated ankyrin containing protein [Source:HGNC Symbol;Acc:HGNC:9987]	7.37	5.73	-1.65	0.32	0.000207	0.00424
34	ACADM	acyl-CoA dehydrogenase, C-4 to C-12 straight chain [Source:HGNC Symbol;Acc:HGNC:89]	8.37	6.72	-1.65	0.319	0.000977	0.00975
112479	ERI2	ERI1 exoribonuclease family member 2 [Source:HGNC Symbol;Acc:HGNC:30541]	6.52	4.87	-1.65	0.319	0.000118	0.00308
51154	MRTO4	MRT4 homolog, ribosome maturation factor [Source:HGNC Symbol;Acc:HGNC:18477]	6.89	5.24	-1.65	0.319	9.9e-05	0.00284
8872	CDC123	cell division cycle 123 [Source:HGNC Symbol;Acc:HGNC:16827]	9.04	7.38	-1.65	0.318	0.000468	0.00648
54951	COMMD8	COMM domain containing 8 [Source:HGNC Symbol;Acc:HGNC:26036]	9.52	7.87	-1.65	0.318	6.1e-05	0.00217
163486	DENND1B	DENN domain containing 1B [Source:HGNC Symbol;Acc:HGNC:28404]	7.66	6	-1.65	0.318	2.99e-05	0.00148
10296	MAEA	macrophage erythroblast attacher [Source:HGNC Symbol;Acc:HGNC:13731]	7.88	6.23	-1.65	0.318	2.84e-05	0.00147
54682	MANSC1	MANSC domain containing 1 [Source:HGNC Symbol;Acc:HGNC:25505]	7.79	6.13	-1.65	0.318	0.00207	0.0152
28966	SNX24	sorting nexin 24 [Source:HGNC Symbol;Acc:HGNC:21533]	7.62	5.97	-1.65	0.318	0.000549	0.00705
11160	ERLIN2	ER lipid raft associated 2 [Source:HGNC Symbol;Acc:HGNC:1356]	6.81	5.15	-1.66	0.317	2.49e-06	0.000462
11222	MRPL3	mitochondrial ribosomal protein L3 [Source:HGNC Symbol;Acc:HGNC:10379]	9.91	8.25	-1.66	0.317	0.00139	0.0121
7283	TUBG1	tubulin gamma 1 [Source:HGNC Symbol;Acc:HGNC:12417]	8.03	6.37	-1.66	0.317	1.03e-06	0.000305
25972	UNC50	unc-50 inner nuclear membrane RNA binding protein [Source:HGNC Symbol;Acc:HGNC:16046]	8.92	7.27	-1.66	0.317	0.000277	0.00492
2967	GTF2H3	general transcription factor IIH subunit 3 [Source:HGNC Symbol;Acc:HGNC:4657]	5.5	3.84	-1.66	0.316	2.98e-05	0.00148
24138	IFIT5	interferon induced protein with tetratricopeptide repeats 5 [Source:HGNC Symbol;Acc:HGNC:13328]	9.1	7.44	-1.66	0.316	9.77e-05	0.00283
9897	WASHC5	WASH complex subunit 5 [Source:HGNC Symbol;Acc:HGNC:28984]	7.63	5.96	-1.66	0.316	2.1e-07	0.000184
5286	PIK3C2A	phosphatidylinositol-4-phosphate 3-kinase catalytic subunit type 2 alpha [Source:HGNC Symbol;Acc:HGNC:8971]	8.53	6.86	-1.67	0.315	5.46e-05	0.00204
5111	PCNA	proliferating cell nuclear antigen [Source:HGNC Symbol;Acc:HGNC:8729]	8.97	7.3	-1.67	0.314	0.0024	0.0165
25813	SAMM50	SAMM50 sorting and assembly machinery component [Source:HGNC Symbol;Acc:HGNC:24276]	8.25	6.58	-1.67	0.314	0.000468	0.00648
285672	SREK1IP1	SREK1 interacting protein 1 [Source:HGNC Symbol;Acc:HGNC:26716]	6.02	4.35	-1.67	0.314	4.58e-05	0.00187
10257	ABCC4	ATP binding cassette subfamily C member 4 [Source:HGNC Symbol;Acc:HGNC:55]	7.83	6.15	-1.68	0.313	0.00645	0.0295
79072	FASTKD3	FAST kinase domains 3 [Source:HGNC Symbol;Acc:HGNC:28758]	7.15	5.47	-1.68	0.313	5.15e-05	0.00199
2632	GBE1	1,4-alpha-glucan branching enzyme 1 [Source:HGNC Symbol;Acc:HGNC:4180]	10.7	9.07	-1.68	0.313	4.39e-05	0.00183
8204	NRIP1	nuclear receptor interacting protein 1 [Source:HGNC Symbol;Acc:HGNC:8001]	7.98	6.29	-1.68	0.311	4.15e-06	0.000536
11193	WBP4	WW domain binding protein 4 [Source:HGNC Symbol;Acc:HGNC:12739]	7.02	5.33	-1.68	0.311	6.75e-06	0.000657
2530	FUT8	fucosyltransferase 8 [Source:HGNC Symbol;Acc:HGNC:4019]	8.44	6.76	-1.69	0.31	0.0113	0.0409
202	CRYBG1	crystallin beta-gamma domain containing 1 [Source:HGNC Symbol;Acc:HGNC:356]	9.01	7.32	-1.69	0.309	0.000631	0.00754
8382	NME5	NME/NM23 family member 5 [Source:HGNC Symbol;Acc:HGNC:7853]	7.18	5.48	-1.7	0.308	7.7e-05	0.00247
54517	PUS7	pseudouridylate synthase 7 (putative) [Source:HGNC Symbol;Acc:HGNC:26033]	7	5.3	-1.7	0.308	0.000195	0.00412
5638	PRRG1	proline rich and Gla domain 1 [Source:HGNC Symbol;Acc:HGNC:9469]	7.02	5.32	-1.7	0.307	2.14e-05	0.00126
7277	TUBA4A	tubulin alpha 4a [Source:HGNC Symbol;Acc:HGNC:12407]	10.5	8.8	-1.7	0.307	0.000461	0.00643
8491	MAP4K3	mitogen-activated protein kinase kinase kinase kinase 3 [Source:HGNC Symbol;Acc:HGNC:6865]	7.79	6.09	-1.71	0.307	0.000154	0.00365
1964	EIF1AX	eukaryotic translation initiation factor 1A, X-linked [Source:HGNC Symbol;Acc:HGNC:3250]	7.44	5.73	-1.71	0.306	0.0019	0.0145
114932	MRFAP1L1	Morf4 family associated protein 1 like 1 [Source:HGNC Symbol;Acc:HGNC:28796]	8.96	7.25	-1.71	0.306	0.000792	0.00866
84869	CBR4	carbonyl reductase 4 [Source:HGNC Symbol;Acc:HGNC:25891]	7.13	5.41	-1.71	0.305	0.000343	0.00548
1653	DDX1	DEAD-box helicase 1 [Source:HGNC Symbol;Acc:HGNC:2734]	9.42	7.7	-1.71	0.305	0.000482	0.0066
3930	LBR	lamin B receptor [Source:HGNC Symbol;Acc:HGNC:6518]	8.5	6.79	-1.71	0.305	0.000151	0.0036
79884	MAP9	microtubule associated protein 9 [Source:HGNC Symbol;Acc:HGNC:26118]	6.97	5.26	-1.71	0.305	0.00248	0.0168
60560	NAA35	N(alpha)-acetyltransferase 35, NatC auxiliary subunit [Source:HGNC Symbol;Acc:HGNC:24340]	7.72	6	-1.71	0.305	2.15e-05	0.00126
25966	C2CD2	C2 calcium dependent domain containing 2 [Source:HGNC Symbol;Acc:HGNC:1266]	6.97	5.25	-1.72	0.303	4.04e-06	0.000536
7296	TXNRD1	thioredoxin reductase 1 [Source:HGNC Symbol;Acc:HGNC:12437]	12.7	11	-1.72	0.303	0.000155	0.00365
9197	SLC33A1	solute carrier family 33 member 1 [Source:HGNC Symbol;Acc:HGNC:95]	7.85	6.12	-1.73	0.302	3.28e-05	0.00151
965	CD58	CD58 molecule [Source:HGNC Symbol;Acc:HGNC:1688]	8.02	6.28	-1.75	0.298	0.000912	0.0094
90806	ANGEL2	angel homolog 2 [Source:HGNC Symbol;Acc:HGNC:30534]	6.15	4.4	-1.75	0.297	6.55e-06	0.000656
51279	C1RL	complement C1r subcomponent like [Source:HGNC Symbol;Acc:HGNC:21265]	7.91	6.16	-1.75	0.297	5.89e-05	0.00214
79669	C3orf52	chromosome 3 open reading frame 52 [Source:HGNC Symbol;Acc:HGNC:26255]	8.45	6.7	-1.75	0.297	0.000231	0.00451
3491	CYR61	cysteine rich angiogenic inducer 61 [Source:HGNC Symbol;Acc:HGNC:2654]	10.5	8.78	-1.75	0.297	0.00127	0.0115
79912	PYROXD1	pyridine nucleotide-disulphide oxidoreductase domain 1 [Source:HGNC Symbol;Acc:HGNC:26162]	8.18	6.42	-1.75	0.297	0.00123	0.0113
7263	TST	thiosulfate sulfurtransferase [Source:HGNC Symbol;Acc:HGNC:12388]	9.35	7.6	-1.75	0.296	7.32e-05	0.00242
9847	C2CD5	C2 calcium dependent domain containing 5 [Source:HGNC Symbol;Acc:HGNC:29062]	7.08	5.31	-1.77	0.294	0.000133	0.0033
10260	DENND4A	DENN domain containing 4A [Source:HGNC Symbol;Acc:HGNC:24321]	5.5	3.74	-1.77	0.294	7.06e-06	0.000679
3838	KPNA2	karyopherin subunit alpha 2 [Source:HGNC Symbol;Acc:HGNC:6395]	11.2	9.44	-1.77	0.294	2.56e-06	0.000462
10795	ZNF268	zinc finger protein 268 [Source:HGNC Symbol;Acc:HGNC:13061]	5.63	3.87	-1.77	0.294	6.59e-06	0.000656
3855	KRT7	keratin 7 [Source:HGNC Symbol;Acc:HGNC:6445]	11.1	9.31	-1.77	0.293	0.00824	0.0339
51103	NDUFAF1	NADH:ubiquinone oxidoreductase complex assembly factor 1 [Source:HGNC Symbol;Acc:HGNC:18828]	8.48	6.71	-1.77	0.293	0.000422	0.00617
64854	USP46	ubiquitin specific peptidase 46 [Source:HGNC Symbol;Acc:HGNC:20075]	6.17	4.4	-1.77	0.293	9.75e-06	0.000848
8883	NAE1	NEDD8 activating enzyme E1 subunit 1 [Source:HGNC Symbol;Acc:HGNC:621]	9.9	8.12	-1.78	0.292	1.58e-05	0.00106
10799	RPP40	ribonuclease P/MRP subunit p40 [Source:HGNC Symbol;Acc:HGNC:20992]	6.86	5.08	-1.78	0.292	0.000596	0.00737
10539	GLRX3	glutaredoxin 3 [Source:HGNC Symbol;Acc:HGNC:15987]	9.62	7.84	-1.78	0.291	0.000435	0.00625
57380	MRS2	MRS2, magnesium transporter [Source:HGNC Symbol;Acc:HGNC:13785]	7.34	5.55	-1.79	0.29	0.000197	0.00414
9451	EIF2AK3	eukaryotic translation initiation factor 2 alpha kinase 3 [Source:HGNC Symbol;Acc:HGNC:3255]	7.68	5.9	-1.79	0.289	0.000667	0.00774
60485	SAV1	salvador family WW domain containing protein 1 [Source:HGNC Symbol;Acc:HGNC:17795]	8.37	6.57	-1.8	0.288	7.63e-05	0.00246
7965	AIMP2	aminoacyl tRNA synthetase complex interacting multifunctional protein 2 [Source:HGNC Symbol;Acc:HGNC:20609]	9.23	7.43	-1.8	0.287	2.05e-05	0.00124
51734	MSRB1	methionine sulfoxide reductase B1 [Source:HGNC Symbol;Acc:HGNC:14133]	11	9.23	-1.8	0.287	1.84e-05	0.00115
51012	PRELID3B	PRELI domain containing 3B [Source:HGNC Symbol;Acc:HGNC:15892]	9.02	7.22	-1.8	0.287	0.00201	0.0149
79184	BRCC3	BRCA1/BRCA2-containing complex subunit 3 [Source:HGNC Symbol;Acc:HGNC:24185]	5.55	3.75	-1.81	0.286	2.16e-05	0.00126
8662	EIF3B	eukaryotic translation initiation factor 3 subunit B [Source:HGNC Symbol;Acc:HGNC:3280]	9.09	7.28	-1.81	0.286	6.65e-06	0.000656
25936	NSL1	NSL1, MIS12 kinetochore complex component [Source:HGNC Symbol;Acc:HGNC:24548]	7.93	6.12	-1.81	0.286	0.000275	0.0049
55746	NUP133	nucleoporin 133 [Source:HGNC Symbol;Acc:HGNC:18016]	7.34	5.53	-1.81	0.286	3.55e-05	0.00158
163590	TOR1AIP2	torsin 1A interacting protein 2 [Source:HGNC Symbol;Acc:HGNC:24055]	9.26	7.45	-1.81	0.286	5.59e-06	0.000627
8451	CUL4A	cullin 4A [Source:HGNC Symbol;Acc:HGNC:2554]	7.89	6.08	-1.81	0.284	1.7e-05	0.00109
11010	GLIPR1	GLI pathogenesis related 1 [Source:HGNC Symbol;Acc:HGNC:17001]	8.19	6.37	-1.81	0.284	6.43e-05	0.00225
23505	TMEM131	transmembrane protein 131 [Source:HGNC Symbol;Acc:HGNC:30366]	7.64	5.82	-1.82	0.284	0.000139	0.00341
57823	SLAMF7	SLAM family member 7 [Source:HGNC Symbol;Acc:HGNC:21394]	8.85	7.03	-1.82	0.283	0.011	0.0401
54503	ZDHHC13	zinc finger DHHC-type containing 13 [Source:HGNC Symbol;Acc:HGNC:18413]	7.89	6.07	-1.82	0.283	0.000493	0.00667
8669	EIF3J	eukaryotic translation initiation factor 3 subunit J [Source:HGNC Symbol;Acc:HGNC:3270]	6.43	4.6	-1.82	0.282	7.54e-05	0.00245
84790	TUBA1C	tubulin alpha 1c [Source:HGNC Symbol;Acc:HGNC:20768]	12.1	10.3	-1.82	0.282	8.57e-07	0.000287
79624	ARMT1	acidic residue methyltransferase 1 [Source:HGNC Symbol;Acc:HGNC:17872]	9.38	7.55	-1.83	0.281	2.02e-06	0.000442
11329	STK38	serine/threonine kinase 38 [Source:HGNC Symbol;Acc:HGNC:17847]	8.18	6.34	-1.83	0.281	0.000368	0.00572
545	ATR	ATR serine/threonine kinase [Source:HGNC Symbol;Acc:HGNC:882]	6.15	4.32	-1.83	0.28	6.69e-06	0.000656
26035	GLCE	glucuronic acid epimerase [Source:HGNC Symbol;Acc:HGNC:17855]	6.31	4.48	-1.84	0.28	6.54e-05	0.00225
29957	SLC25A24	solute carrier family 25 member 24 [Source:HGNC Symbol;Acc:HGNC:20662]	10.2	8.41	-1.84	0.28	5.17e-06	0.0006
55181	SMG8	SMG8, nonsense mediated mRNA decay factor [Source:HGNC Symbol;Acc:HGNC:25551]	7.62	5.78	-1.84	0.28	0.00128	0.0116
79772	MCTP1	multiple C2 and transmembrane domain containing 1 [Source:HGNC Symbol;Acc:HGNC:26183]	8.05	6.21	-1.84	0.279	0.00683	0.0305
55172	DNAAF2	dynein axonemal assembly factor 2 [Source:HGNC Symbol;Acc:HGNC:20188]	7.94	6.09	-1.85	0.278	8.15e-07	0.000287
79443	FYCO1	FYVE and coiled-coil domain containing 1 [Source:HGNC Symbol;Acc:HGNC:14673]	6.52	4.67	-1.85	0.278	0.000638	0.00758
54780	NSMCE4A	NSE4 homolog A, SMC5-SMC6 complex component [Source:HGNC Symbol;Acc:HGNC:25935]	8.26	6.42	-1.85	0.278	0.0024	0.0165
5036	PA2G4	proliferation-associated 2G4 [Source:HGNC Symbol;Acc:HGNC:8550]	6.81	4.96	-1.85	0.277	0.00533	0.0263
10606	PAICS	phosphoribosylaminoimidazole carboxylase and phosphoribosylaminoimidazolesuccinocarboxamide synthase [Source:HGNC Symbol;Acc:HGNC:8587]	7.68	5.83	-1.85	0.277	0.000224	0.00446
64921	CASD1	CAS1 domain containing 1 [Source:HGNC Symbol;Acc:HGNC:16014]	6.17	4.31	-1.86	0.276	6.25e-06	0.000656
55125	CEP192	centrosomal protein 192 [Source:HGNC Symbol;Acc:HGNC:25515]	6.13	4.28	-1.86	0.276	0.000138	0.00338
7334	UBE2N	ubiquitin conjugating enzyme E2 N [Source:HGNC Symbol;Acc:HGNC:12492]	8.65	6.78	-1.86	0.275	1.26e-07	0.000184
8562	DENR	density regulated re-initiation and release factor [Source:HGNC Symbol;Acc:HGNC:2769]	9.2	7.34	-1.87	0.274	2.18e-05	0.00126
51071	DERA	deoxyribose-phosphate aldolase [Source:HGNC Symbol;Acc:HGNC:24269]	9.6	7.73	-1.87	0.274	0.000754	0.00837
7419	VDAC3	voltage dependent anion channel 3 [Source:HGNC Symbol;Acc:HGNC:12674]	10.1	8.19	-1.87	0.274	6.64e-07	0.000268
9317	PTER	phosphotriesterase related [Source:HGNC Symbol;Acc:HGNC:9590]	9.55	7.68	-1.87	0.273	0.000793	0.00866
5481	PPID	peptidylprolyl isomerase D [Source:HGNC Symbol;Acc:HGNC:9257]	8.72	6.84	-1.88	0.272	3.56e-06	0.000526
54902	TTC19	tetratricopeptide repeat domain 19 [Source:HGNC Symbol;Acc:HGNC:26006]	8.57	6.69	-1.88	0.272	0.000741	0.00828
9765	ZFYVE16	zinc finger FYVE-type containing 16 [Source:HGNC Symbol;Acc:HGNC:20756]	7.15	5.28	-1.88	0.272	0.00179	0.0139
55900	ZNF302	zinc finger protein 302 [Source:HGNC Symbol;Acc:HGNC:13848]	5.52	3.64	-1.88	0.272	6.62e-06	0.000656
7699	ZNF140	zinc finger protein 140 [Source:HGNC Symbol;Acc:HGNC:12925]	7.35	5.46	-1.88	0.271	0.00127	0.0115
9732	DOCK4	dedicator of cytokinesis 4 [Source:HGNC Symbol;Acc:HGNC:19192]	8.17	6.28	-1.89	0.271	1.9e-06	0.000433
471	ATIC	5-aminoimidazole-4-carboxamide ribonucleotide formyltransferase/IMP cyclohydrolase [Source:HGNC Symbol;Acc:HGNC:794]	8.81	6.92	-1.89	0.27	0.00137	0.0121
1738	DLD	dihydrolipoamide dehydrogenase [Source:HGNC Symbol;Acc:HGNC:2898]	9.69	7.8	-1.89	0.27	1.03e-05	0.000873
28957	MRPS28	mitochondrial ribosomal protein S28 [Source:HGNC Symbol;Acc:HGNC:14513]	9.28	7.39	-1.89	0.27	0.00223	0.0158
11254	SLC6A14	solute carrier family 6 member 14 [Source:HGNC Symbol;Acc:HGNC:11047]	12.8	10.9	-1.89	0.27	0.00141	0.0122
26060	APPL1	adaptor protein, phosphotyrosine interacting with PH domain and leucine zipper 1 [Source:HGNC Symbol;Acc:HGNC:24035]	6.16	4.27	-1.89	0.269	1.46e-05	0.00106
79738	BBS10	Bardet-Biedl syndrome 10 [Source:HGNC Symbol;Acc:HGNC:26291]	5.7	3.81	-1.89	0.269	3.17e-05	0.0015
23167	EFR3A	EFR3 homolog A [Source:HGNC Symbol;Acc:HGNC:28970]	9.51	7.61	-1.9	0.268	0.000125	0.00322
51018	RRP15	ribosomal RNA processing 15 homolog [Source:HGNC Symbol;Acc:HGNC:24255]	6.01	4.1	-1.9	0.268	1.33e-05	0.00103
79689	STEAP4	STEAP4 metalloreductase [Source:HGNC Symbol;Acc:HGNC:21923]	7.56	5.65	-1.91	0.266	0.00113	0.0107
2181	ACSL3	acyl-CoA synthetase long chain family member 3 [Source:HGNC Symbol;Acc:HGNC:3570]	9.78	7.86	-1.92	0.265	2.08e-07	0.000184
23219	FBXO28	F-box protein 28 [Source:HGNC Symbol;Acc:HGNC:29046]	8.37	6.45	-1.92	0.265	3.38e-06	0.000525
9734	HDAC9	histone deacetylase 9 [Source:HGNC Symbol;Acc:HGNC:14065]	8.09	6.17	-1.92	0.265	0.000429	0.0062
7280	TUBB2A	tubulin beta 2A class IIa [Source:HGNC Symbol;Acc:HGNC:12412]	10	8.08	-1.92	0.265	0.00104	0.0102
79886	CAAP1	caspase activity and apoptosis inhibitor 1 [Source:HGNC Symbol;Acc:HGNC:25834]	8.76	6.84	-1.92	0.264	7.61e-07	0.000287
55791	LRIF1	ligand dependent nuclear receptor interacting factor 1 [Source:HGNC Symbol;Acc:HGNC:30299]	7	5.08	-1.92	0.264	9.83e-05	0.00284
9712	USP6NL	USP6 N-terminal like [Source:HGNC Symbol;Acc:HGNC:16858]	7.02	5.09	-1.93	0.262	0.000521	0.00684
55156	ARMC1	armadillo repeat containing 1 [Source:HGNC Symbol;Acc:HGNC:17684]	8.8	6.86	-1.94	0.261	1.08e-06	0.000305
55885	LMO3	LIM domain only 3 [Source:HGNC Symbol;Acc:HGNC:6643]	7.32	5.38	-1.94	0.261	0.00522	0.026
1182	CLCN3	chloride voltage-gated channel 3 [Source:HGNC Symbol;Acc:HGNC:2021]	7.6	5.66	-1.94	0.26	0.000343	0.00548
9969	MED13	mediator complex subunit 13 [Source:HGNC Symbol;Acc:HGNC:22474]	9.15	7.21	-1.95	0.26	2.29e-05	0.00131
2920	CXCL2	C-X-C motif chemokine ligand 2 [Source:HGNC Symbol;Acc:HGNC:4603]	12.8	10.9	-1.96	0.257	1.5e-05	0.00106
10563	CXCL13	C-X-C motif chemokine ligand 13 [Source:HGNC Symbol;Acc:HGNC:10639]	6.53	4.57	-1.97	0.256	0.0141	0.0468
4609	MYC	MYC proto-oncogene, bHLH transcription factor [Source:HGNC Symbol;Acc:HGNC:7553]	9.22	7.25	-1.97	0.255	0.000102	0.00287
51363	CHST15	carbohydrate sulfotransferase 15 [Source:HGNC Symbol;Acc:HGNC:18137]	8.64	6.66	-1.98	0.254	6.12e-06	0.000656
10885	WDR3	WD repeat domain 3 [Source:HGNC Symbol;Acc:HGNC:12755]	7.26	5.28	-1.98	0.253	0.000232	0.00451
23160	WDR43	WD repeat domain 43 [Source:HGNC Symbol;Acc:HGNC:28945]	6.73	4.73	-1.99	0.251	4.7e-06	0.000576
7485	WRB	tryptophan rich basic protein [Source:HGNC Symbol;Acc:HGNC:12790]	9.33	7.34	-1.99	0.251	4.02e-06	0.000536
51501	HIKESHI	Hikeshi, heat shock protein nuclear import factor [Source:HGNC Symbol;Acc:HGNC:26938]	6.63	4.63	-2	0.25	0.00107	0.0103
9778	KIAA0232	KIAA0232 [Source:HGNC Symbol;Acc:HGNC:28992]	7.78	5.78	-2	0.25	1.84e-06	0.000426
10513	APPBP2	amyloid beta precursor protein binding protein 2 [Source:HGNC Symbol;Acc:HGNC:622]	7.55	5.54	-2	0.249	3.75e-05	0.00164
10240	MRPS31	mitochondrial ribosomal protein S31 [Source:HGNC Symbol;Acc:HGNC:16632]	7.29	5.29	-2	0.249	1e-05	0.000859
84617	TUBB6	tubulin beta 6 class V [Source:HGNC Symbol;Acc:HGNC:20776]	10.2	8.21	-2	0.249	0.00209	0.0153
58488	PCTP	phosphatidylcholine transfer protein [Source:HGNC Symbol;Acc:HGNC:8752]	7.36	5.35	-2.01	0.249	1.52e-06	0.000373
54704	PDP1	pyruvate dehyrogenase phosphatase catalytic subunit 1 [Source:HGNC Symbol;Acc:HGNC:9279]	8.55	6.54	-2.01	0.248	0.00162	0.0132
54680	ZNHIT6	zinc finger HIT-type containing 6 [Source:HGNC Symbol;Acc:HGNC:26089]	7.09	5.07	-2.02	0.247	3.61e-05	0.00159
26298	EHF	ETS homologous factor [Source:HGNC Symbol;Acc:HGNC:3246]	6.62	4.6	-2.02	0.246	0.000194	0.00412
79838	TMC5	transmembrane channel like 5 [Source:HGNC Symbol;Acc:HGNC:22999]	7.61	5.57	-2.04	0.244	0.00165	0.0133
9926	LPGAT1	lysophosphatidylglycerol acyltransferase 1 [Source:HGNC Symbol;Acc:HGNC:28985]	7.32	5.28	-2.04	0.243	0.000393	0.00593
2919	CXCL1	C-X-C motif chemokine ligand 1 [Source:HGNC Symbol;Acc:HGNC:4602]	13.1	11.1	-2.04	0.242	1.22e-06	0.000334
253959	RALGAPA1	Ral GTPase activating protein catalytic alpha subunit 1 [Source:HGNC Symbol;Acc:HGNC:17770]	8.25	6.2	-2.04	0.242	0.00148	0.0125
91298	C12orf29	chromosome 12 open reading frame 29 [Source:HGNC Symbol;Acc:HGNC:25322]	7.93	5.89	-2.05	0.242	0.00045	0.00634
23211	ZC3H4	zinc finger CCCH-type containing 4 [Source:HGNC Symbol;Acc:HGNC:17808]	7.66	5.61	-2.05	0.242	1.47e-06	0.00037
10308	ZNF267	zinc finger protein 267 [Source:HGNC Symbol;Acc:HGNC:13060]	9.45	7.4	-2.06	0.241	1.13e-05	0.000918
79720	VPS37B	VPS37B, ESCRT-I subunit [Source:HGNC Symbol;Acc:HGNC:25754]	7.34	5.28	-2.06	0.239	2.85e-05	0.00147
55669	MFN1	mitofusin 1 [Source:HGNC Symbol;Acc:HGNC:18262]	7.52	5.45	-2.07	0.239	3.69e-06	0.000532
80205	CHD9	chromodomain helicase DNA binding protein 9 [Source:HGNC Symbol;Acc:HGNC:25701]	6.88	4.81	-2.07	0.238	2.86e-05	0.00147
23272	FAM208A	family with sequence similarity 208 member A [Source:HGNC Symbol;Acc:HGNC:30314]	7.33	5.26	-2.07	0.238	0.000142	0.00345
987	LRBA	LPS responsive beige-like anchor protein [Source:HGNC Symbol;Acc:HGNC:1742]	7.89	5.82	-2.07	0.238	0.00065	0.00768
84864	RIOX2	ribosomal oxygenase 2 [Source:HGNC Symbol;Acc:HGNC:19441]	6.98	4.91	-2.07	0.238	1.07e-06	0.000305
6575	SLC20A2	solute carrier family 20 member 2 [Source:HGNC Symbol;Acc:HGNC:10947]	7.36	5.3	-2.07	0.238	0.000613	0.00747
138151	NACC2	NACC family member 2 [Source:HGNC Symbol;Acc:HGNC:23846]	7.76	5.68	-2.08	0.237	6.32e-06	0.000656
6318	SERPINB4	serpin family B member 4 [Source:HGNC Symbol;Acc:HGNC:10570]	10.4	8.35	-2.08	0.237	0.00341	0.0202
1503	CTPS1	CTP synthase 1 [Source:HGNC Symbol;Acc:HGNC:2519]	6.85	4.77	-2.08	0.236	7.44e-05	0.00243
25926	NOL11	nucleolar protein 11 [Source:HGNC Symbol;Acc:HGNC:24557]	8.39	6.3	-2.09	0.236	7.09e-06	0.000679
90333	ZNF468	zinc finger protein 468 [Source:HGNC Symbol;Acc:HGNC:33105]	7.05	4.97	-2.09	0.235	0.000119	0.0031
79664	ICE2	interactor of little elongation complex ELL subunit 2 [Source:HGNC Symbol;Acc:HGNC:29885]	6.84	4.74	-2.09	0.234	0.000206	0.00423
81790	RNF170	ring finger protein 170 [Source:HGNC Symbol;Acc:HGNC:25358]	6.37	4.27	-2.1	0.234	2.42e-06	0.000462
669	BPGM	bisphosphoglycerate mutase [Source:HGNC Symbol;Acc:HGNC:1093]	12.2	10.1	-2.1	0.233	8.71e-06	0.000774
4008	LMO7	LIM domain 7 [Source:HGNC Symbol;Acc:HGNC:6646]	6.67	4.57	-2.1	0.233	0.000104	0.00287
330	BIRC3	baculoviral IAP repeat containing 3 [Source:HGNC Symbol;Acc:HGNC:591]	10.6	8.49	-2.11	0.232	7.63e-06	0.000695
60496	AASDHPPT	aminoadipate-semialdehyde dehydrogenase-phosphopantetheinyl transferase [Source:HGNC Symbol;Acc:HGNC:14235]	8.69	6.57	-2.11	0.231	0.000306	0.00519
9603	NFE2L3	nuclear factor, erythroid 2 like 3 [Source:HGNC Symbol;Acc:HGNC:7783]	7.76	5.64	-2.11	0.231	0.000522	0.00685
4739	NEDD9	neural precursor cell expressed, developmentally down-regulated 9 [Source:HGNC Symbol;Acc:HGNC:7733]	7.72	5.6	-2.12	0.23	1.06e-05	0.000879
399664	MEX3D	mex-3 RNA binding family member D [Source:HGNC Symbol;Acc:HGNC:16734]	8.03	5.9	-2.13	0.228	0.000438	0.00626
51163	DBR1	debranching RNA lariats 1 [Source:HGNC Symbol;Acc:HGNC:15594]	6.89	4.75	-2.14	0.227	7.68e-05	0.00247
22868	FASTKD2	FAST kinase domains 2 [Source:HGNC Symbol;Acc:HGNC:29160]	7.85	5.71	-2.14	0.227	1.11e-07	0.000184
26589	MRPL46	mitochondrial ribosomal protein L46 [Source:HGNC Symbol;Acc:HGNC:1192]	8.13	5.99	-2.14	0.227	3.27e-05	0.00151
79931	TNIP3	TNFAIP3 interacting protein 3 [Source:HGNC Symbol;Acc:HGNC:19315]	6.66	4.52	-2.14	0.227	2.99e-05	0.00148
221154	MICU2	mitochondrial calcium uptake 2 [Source:HGNC Symbol;Acc:HGNC:31830]	9.06	6.91	-2.15	0.225	9.22e-05	0.00271
908	CCT6A	chaperonin containing TCP1 subunit 6A [Source:HGNC Symbol;Acc:HGNC:1620]	8.87	6.7	-2.17	0.223	8.52e-05	0.0026
84981	MIR22HG	MIR22 host gene [Source:HGNC Symbol;Acc:HGNC:28219]	8.49	6.31	-2.17	0.222	0.000134	0.0033
8226	PUDP	pseudouridine 5'-phosphatase [Source:HGNC Symbol;Acc:HGNC:16818]	8.15	5.97	-2.17	0.222	0.000168	0.00382
55326	AGPAT5	1-acylglycerol-3-phosphate O-acyltransferase 5 [Source:HGNC Symbol;Acc:HGNC:20886]	7.37	5.19	-2.18	0.221	3.41e-05	0.00155
9646	CTR9	CTR9 homolog, Paf1/RNA polymerase II complex component [Source:HGNC Symbol;Acc:HGNC:16850]	8.22	6.04	-2.18	0.22	0.000201	0.00418
285203	EOGT	EGF domain specific O-linked N-acetylglucosamine transferase [Source:HGNC Symbol;Acc:HGNC:28526]	6.62	4.44	-2.18	0.22	8.89e-07	0.000287
1737	DLAT	dihydrolipoamide S-acetyltransferase [Source:HGNC Symbol;Acc:HGNC:2896]	7.86	5.67	-2.19	0.22	2.64e-06	0.000463
10196	PRMT3	protein arginine methyltransferase 3 [Source:HGNC Symbol;Acc:HGNC:30163]	6.45	4.26	-2.19	0.219	3.84e-05	0.00165
54453	RIN2	Ras and Rab interactor 2 [Source:HGNC Symbol;Acc:HGNC:18750]	8.73	6.53	-2.19	0.219	1.3e-05	0.00101
55319	TMA16	translation machinery associated 16 homolog [Source:HGNC Symbol;Acc:HGNC:25638]	6.47	4.28	-2.19	0.219	3.48e-06	0.000525
81627	TRMT1L	tRNA methyltransferase 1 like [Source:HGNC Symbol;Acc:HGNC:16782]	5.91	3.72	-2.19	0.219	2.16e-06	0.00045
58486	ZBED5	zinc finger BED-type containing 5 [Source:HGNC Symbol;Acc:HGNC:30803]	8.07	5.87	-2.19	0.219	3.04e-07	0.000233
11177	BAZ1A	bromodomain adjacent to zinc finger domain 1A [Source:HGNC Symbol;Acc:HGNC:960]	8.91	6.72	-2.2	0.218	5.25e-05	0.00199
8624	PSMG1	proteasome assembly chaperone 1 [Source:HGNC Symbol;Acc:HGNC:3043]	8.89	6.69	-2.2	0.218	0.000362	0.00565
8607	RUVBL1	RuvB like AAA ATPase 1 [Source:HGNC Symbol;Acc:HGNC:10474]	7.38	5.18	-2.2	0.218	4.23e-07	0.000247
10165	SLC25A13	solute carrier family 25 member 13 [Source:HGNC Symbol;Acc:HGNC:10983]	7.15	4.95	-2.2	0.218	6.77e-08	0.000184
23036	ZNF292	zinc finger protein 292 [Source:HGNC Symbol;Acc:HGNC:18410]	7.05	4.85	-2.2	0.218	5.7e-05	0.00209
55109	AGGF1	angiogenic factor with G-patch and FHA domains 1 [Source:HGNC Symbol;Acc:HGNC:24684]	7.13	4.93	-2.2	0.217	6.33e-07	0.000268
10049	DNAJB6	DnaJ heat shock protein family (Hsp40) member B6 [Source:HGNC Symbol;Acc:HGNC:14888]	6.86	4.66	-2.2	0.217	2.93e-05	0.00148
8504	PEX3	peroxisomal biogenesis factor 3 [Source:HGNC Symbol;Acc:HGNC:8858]	7.36	5.16	-2.21	0.217	4.12e-06	0.000536
55110	MAGOHB	mago homolog B, exon junction complex core component [Source:HGNC Symbol;Acc:HGNC:25504]	7.82	5.62	-2.21	0.216	1.74e-05	0.00111
23657	SLC7A11	solute carrier family 7 member 11 [Source:HGNC Symbol;Acc:HGNC:11059]	8.83	6.62	-2.21	0.216	3.83e-05	0.00165
10381	TUBB3	tubulin beta 3 class III [Source:HGNC Symbol;Acc:HGNC:20772]	8.39	6.18	-2.22	0.215	4.35e-05	0.00182
387263	C6orf120	chromosome 6 open reading frame 120 [Source:HGNC Symbol;Acc:HGNC:21247]	7.25	5.03	-2.22	0.214	5.63e-07	0.000268
57103	TIGAR	TP53 induced glycolysis regulatory phosphatase [Source:HGNC Symbol;Acc:HGNC:1185]	8.32	6.09	-2.23	0.213	0.000432	0.00621
51111	KMT5B	lysine methyltransferase 5B [Source:HGNC Symbol;Acc:HGNC:24283]	6.87	4.64	-2.24	0.212	1.47e-05	0.00106
55726	INTS13	integrator complex subunit 13 [Source:HGNC Symbol;Acc:HGNC:20174]	8.55	6.3	-2.25	0.21	1.29e-05	0.00101
6351	CCL4	C-C motif chemokine ligand 4 [Source:HGNC Symbol;Acc:HGNC:10630]	11.1	8.81	-2.26	0.208	0.0138	0.0462
10576	CCT2	chaperonin containing TCP1 subunit 2 [Source:HGNC Symbol;Acc:HGNC:1615]	9.34	7.07	-2.27	0.207	4.84e-05	0.00192
10973	ASCC3	activating signal cointegrator 1 complex subunit 3 [Source:HGNC Symbol;Acc:HGNC:18697]	7.28	5	-2.28	0.205	0.000297	0.0051
839	CASP6	caspase 6 [Source:HGNC Symbol;Acc:HGNC:1507]	8.11	5.82	-2.29	0.204	0.000189	0.00406
5917	RARS	arginyl-tRNA synthetase [Source:HGNC Symbol;Acc:HGNC:9870]	10.2	7.95	-2.29	0.204	4.54e-05	0.00186
8772	FADD	Fas associated via death domain [Source:HGNC Symbol;Acc:HGNC:3573]	8.36	6.06	-2.3	0.203	6.75e-05	0.00229
57205	ATP10D	ATPase phospholipid transporting 10D (putative) [Source:HGNC Symbol;Acc:HGNC:13549]	6.54	4.23	-2.31	0.202	0.000101	0.00287
81034	SLC25A32	solute carrier family 25 member 32 [Source:HGNC Symbol;Acc:HGNC:29683]	8.38	6.07	-2.31	0.201	3.05e-05	0.00148
55006	TRMT61B	tRNA methyltransferase 61B [Source:HGNC Symbol;Acc:HGNC:26070]	6.62	4.3	-2.32	0.201	2.16e-05	0.00126
9440	MED17	mediator complex subunit 17 [Source:HGNC Symbol;Acc:HGNC:2375]	7.66	5.33	-2.32	0.2	1.21e-08	0.000149
80006	TRAPPC13	trafficking protein particle complex 13 [Source:HGNC Symbol;Acc:HGNC:25828]	6.06	3.74	-2.32	0.2	2.06e-07	0.000184
23262	PPIP5K2	diphosphoinositol pentakisphosphate kinase 2 [Source:HGNC Symbol;Acc:HGNC:29035]	7.36	5.03	-2.33	0.199	6.66e-06	0.000656
10221	TRIB1	tribbles pseudokinase 1 [Source:HGNC Symbol;Acc:HGNC:16891]	9.56	7.23	-2.33	0.199	0.000269	0.00486
9690	UBE3C	ubiquitin protein ligase E3C [Source:HGNC Symbol;Acc:HGNC:16803]	8.56	6.23	-2.33	0.199	5.62e-05	0.00208
55631	LRRC40	leucine rich repeat containing 40 [Source:HGNC Symbol;Acc:HGNC:26004]	8.03	5.67	-2.36	0.195	2.38e-06	0.000462
64417	TMEM267	transmembrane protein 267 [Source:HGNC Symbol;Acc:HGNC:26139]	7.51	5.15	-2.36	0.194	0.000881	0.00919
3880	KRT19	keratin 19 [Source:HGNC Symbol;Acc:HGNC:6436]	12.3	9.89	-2.37	0.194	0.000474	0.00651
55622	TTC27	tetratricopeptide repeat domain 27 [Source:HGNC Symbol;Acc:HGNC:25986]	7.23	4.85	-2.38	0.193	0.000206	0.00423
51143	DYNC1LI1	dynein cytoplasmic 1 light intermediate chain 1 [Source:HGNC Symbol;Acc:HGNC:18745]	8.31	5.93	-2.38	0.192	3.24e-05	0.00151
10383	TUBB4B	tubulin beta 4B class IVb [Source:HGNC Symbol;Acc:HGNC:20771]	11.6	9.22	-2.4	0.19	4.56e-07	0.000248
26128	KIF1BP	KIF1 binding protein [Source:HGNC Symbol;Acc:HGNC:23419]	8.62	6.21	-2.41	0.189	0.000125	0.00322
54819	ZCCHC10	zinc finger CCHC-type containing 10 [Source:HGNC Symbol;Acc:HGNC:25954]	6.44	4.03	-2.41	0.188	6.51e-06	0.000656
10969	EBNA1BP2	EBNA1 binding protein 2 [Source:HGNC Symbol;Acc:HGNC:15531]	8.31	5.83	-2.48	0.179	0.000757	0.00839
79023	NUP37	nucleoporin 37 [Source:HGNC Symbol;Acc:HGNC:29929]	8.61	6.12	-2.5	0.177	1.65e-06	0.000397
145389	SLC38A6	solute carrier family 38 member 6 [Source:HGNC Symbol;Acc:HGNC:19863]	6.86	4.37	-2.5	0.177	8.47e-07	0.000287
79718	TBL1XR1	transducin beta like 1 X-linked receptor 1 [Source:HGNC Symbol;Acc:HGNC:29529]	7.41	4.91	-2.5	0.177	1.28e-05	0.00101
10190	TXNDC9	thioredoxin domain containing 9 [Source:HGNC Symbol;Acc:HGNC:24110]	10.7	8.21	-2.5	0.176	8.71e-08	0.000184
1326	MAP3K8	mitogen-activated protein kinase kinase kinase 8 [Source:HGNC Symbol;Acc:HGNC:6860]	8.26	5.75	-2.51	0.176	1.66e-05	0.00108
22944	KIN	Kin17 DNA and RNA binding protein [Source:HGNC Symbol;Acc:HGNC:6327]	7.35	4.84	-2.52	0.175	7.33e-05	0.00242
51315	KRCC1	lysine rich coiled-coil 1 [Source:HGNC Symbol;Acc:HGNC:28039]	9.08	6.56	-2.52	0.175	0.000162	0.00376
79736	TEFM	transcription elongation factor, mitochondrial [Source:HGNC Symbol;Acc:HGNC:26223]	7.84	5.32	-2.52	0.174	1.46e-05	0.00106
5791	PTPRE	protein tyrosine phosphatase, receptor type E [Source:HGNC Symbol;Acc:HGNC:9669]	7.76	5.16	-2.6	0.165	0.000108	0.00293
6742	SSBP1	single stranded DNA binding protein 1 [Source:HGNC Symbol;Acc:HGNC:11317]	10.7	8.13	-2.6	0.165	7.34e-05	0.00242
6428	SRSF3	serine and arginine rich splicing factor 3 [Source:HGNC Symbol;Acc:HGNC:10785]	8.37	5.75	-2.61	0.164	7.36e-06	0.000689
6102	RP2	RP2, ARL3 GTPase activating protein [Source:HGNC Symbol;Acc:HGNC:10274]	9.21	6.59	-2.63	0.162	3.74e-05	0.00164
6059	ABCE1	ATP binding cassette subfamily E member 1 [Source:HGNC Symbol;Acc:HGNC:69]	7.6	4.95	-2.64	0.16	0.000186	0.00402
29088	MRPL15	mitochondrial ribosomal protein L15 [Source:HGNC Symbol;Acc:HGNC:14054]	9.11	6.45	-2.66	0.158	0.000122	0.00316
79098	C1orf116	chromosome 1 open reading frame 116 [Source:HGNC Symbol;Acc:HGNC:28667]	7.97	5.26	-2.71	0.153	3.12e-06	0.000525
55745	AP5M1	adaptor related protein complex 5 mu 1 subunit [Source:HGNC Symbol;Acc:HGNC:20192]	8.41	5.68	-2.73	0.151	0.000242	0.00463
79644	SRD5A3	steroid 5 alpha-reductase 3 [Source:HGNC Symbol;Acc:HGNC:25812]	8.75	5.99	-2.75	0.148	0.00367	0.021
26953	RANBP6	RAN binding protein 6 [Source:HGNC Symbol;Acc:HGNC:9851]	7.23	4.48	-2.76	0.148	3.56e-07	0.000247
57496	MKL2	MKL1/myocardin like 2 [Source:HGNC Symbol;Acc:HGNC:29819]	7.6	4.83	-2.77	0.146	4.82e-05	0.00192
2921	CXCL3	C-X-C motif chemokine ligand 3 [Source:HGNC Symbol;Acc:HGNC:4604]	12.4	9.59	-2.78	0.146	4.07e-07	0.000247
51491	NOP16	NOP16 nucleolar protein [Source:HGNC Symbol;Acc:HGNC:26934]	7.73	4.94	-2.79	0.145	7.05e-05	0.00237
8942	KYNU	kynureninase [Source:HGNC Symbol;Acc:HGNC:6469]	11.2	8.37	-2.81	0.143	1.39e-05	0.00105
79675	FASTKD1	FAST kinase domains 1 [Source:HGNC Symbol;Acc:HGNC:26150]	8.11	5.29	-2.82	0.141	1.47e-05	0.00106
5901	RAN	RAN, member RAS oncogene family [Source:HGNC Symbol;Acc:HGNC:9846]	9.49	6.65	-2.84	0.14	0.00217	0.0156
131566	DCBLD2	discoidin, CUB and LCCL domain containing 2 [Source:HGNC Symbol;Acc:HGNC:24627]	9.59	6.68	-2.91	0.133	6.65e-07	0.000268
51110	LACTB2	lactamase beta 2 [Source:HGNC Symbol;Acc:HGNC:18512]	8.31	5.33	-2.97	0.127	2.2e-06	0.00045
26273	FBXO3	F-box protein 3 [Source:HGNC Symbol;Acc:HGNC:13582]	8	5.01	-2.98	0.127	2.52e-05	0.00136
4306	NR3C2	nuclear receptor subfamily 3 group C member 2 [Source:HGNC Symbol;Acc:HGNC:7979]	10.3	7.34	-3	0.125	0.0018	0.014
25842	ASF1A	anti-silencing function 1A histone chaperone [Source:HGNC Symbol;Acc:HGNC:20995]	8.21	5.16	-3.04	0.121	2.88e-05	0.00147
178	AGL	amylo-alpha-1, 6-glucosidase, 4-alpha-glucanotransferase [Source:HGNC Symbol;Acc:HGNC:321]	8.4	5.35	-3.06	0.12	0.000338	0.00546
9447	AIM2	absent in melanoma 2 [Source:HGNC Symbol;Acc:HGNC:357]	8.35	5.26	-3.1	0.117	3.96e-05	0.00169
259230	SGMS1	sphingomyelin synthase 1 [Source:HGNC Symbol;Acc:HGNC:29799]	9.62	6.47	-3.16	0.112	0.000151	0.00361
85453	TSPYL5	TSPY like 5 [Source:HGNC Symbol;Acc:HGNC:29367]	8.1	4.91	-3.18	0.11	8.71e-07	0.000287
81929	SEH1L	SEH1 like nucleoporin [Source:HGNC Symbol;Acc:HGNC:30379]	8.13	4.92	-3.22	0.108	3.89e-06	0.000536
5718	PSMD12	proteasome 26S subunit, non-ATPase 12 [Source:HGNC Symbol;Acc:HGNC:9557]	8.16	4.95	-3.22	0.107	2.02e-07	0.000184
154	ADRB2	adrenoceptor beta 2 [Source:HGNC Symbol;Acc:HGNC:286]	9.8	6.56	-3.23	0.106	1.56e-05	0.00106
55179	FAIM	Fas apoptotic inhibitory molecule [Source:HGNC Symbol;Acc:HGNC:18703]	7.86	4.61	-3.25	0.105	2.53e-06	0.000462
9	NAT1	N-acetyltransferase 1 [Source:HGNC Symbol;Acc:HGNC:7645]	7.94	4.69	-3.25	0.105	2.47e-07	0.000202
1657	DMXL1	Dmx like 1 [Source:HGNC Symbol;Acc:HGNC:2937]	7.45	4.16	-3.29	0.102	1.14e-07	0.000184
64859	NABP1	nucleic acid binding protein 1 [Source:HGNC Symbol;Acc:HGNC:26232]	7.36	4.06	-3.3	0.102	4.06e-07	0.000247
89795	NAV3	neuron navigator 3 [Source:HGNC Symbol;Acc:HGNC:15998]	8.27	4.96	-3.3	0.101	1.52e-07	0.000184
84159	ARID5B	AT-rich interaction domain 5B [Source:HGNC Symbol;Acc:HGNC:17362]	10.3	6.92	-3.35	0.0979	0.000239	0.00458
113251	LARP4	La ribonucleoprotein domain family member 4 [Source:HGNC Symbol;Acc:HGNC:24320]	7.97	4.6	-3.37	0.0966	4.66e-07	0.000248
7846	TUBA1A	tubulin alpha 1a [Source:HGNC Symbol;Acc:HGNC:20766]	13.2	9.68	-3.5	0.0884	1.09e-06	0.000305
10769	PLK2	polo like kinase 2 [Source:HGNC Symbol;Acc:HGNC:19699]	9.05	5.3	-3.75	0.0743	0.00015	0.0036

## Sheet: Supplementary Table 5
Hallmark gene set	Hallmark erichment p-value after Benjamini-Hochberg adjustment	Canonical pathway	Pathway enrichment p-value after Benjamini-Hochberg adjustment
HALLMARK_EPITHELIAL_MESENCHYMAL_TRANSITION	1.67939e-11	NABA_MATRISOME	1.56025e-05
HALLMARK_HYPOXIA	4.56797e-11	NABA_CORE_MATRISOME	4.9569e-05
HALLMARK_TNFA_SIGNALING_VIA_NFKB	2.97651e-08	NABA_ECM_GLYCOPROTEINS	5.32007e-05
HALLMARK_P53_PATHWAY	3.21469e-06	REACTOME_BMAL1_CLOCK_NPAS2_ACTIVATES_CIRCADIAN_EXPRESSION	0.00954684
HALLMARK_INTERFERON_ALPHA_RESPONSE	0.000115657	REACTOME_REGULATION_OF_INSULIN_LIKE_GROWTH_FACTOR_IGF_ACTIVITY_BY_INSULIN_LIKE_GROWTH_FACTOR_BINDING_PROTEINS_IGFBPS	0.0286339
HALLMARK_INTERFERON_GAMMA_RESPONSE	0.00184791	REACTOME_CIRCADIAN_CLOCK	0.03534
HALLMARK_IL2_STAT5_SIGNALING	0.00184791	NABA_ECM_REGULATORS	0.0948084
HALLMARK_APOPTOSIS	0.00829057	KEGG_CIRCADIAN_RHYTHM_MAMMAL	0.145062
HALLMARK_GLYCOLYSIS	0.00829057	REACTOME_APOPTOSIS_INDUCED_DNA_FRAGMENTATION	0.145062
HALLMARK_KRAS_SIGNALING_UP	0.0103073	REACTOME_NUCLEAR_RECEPTOR_TRANSCRIPTION_PATHWAY	0.145062
HALLMARK_ESTROGEN_RESPONSE_LATE	0.0108959	PID_CIRCADIAN_PATHWAY	0.202571
HALLMARK_ESTROGEN_RESPONSE_EARLY	0.0300566	NABA_MATRISOME_ASSOCIATED	0.271917
HALLMARK_MYOGENESIS	0.0305514	PID_MYC_REPRESS_PATHWAY	0.301842
HALLMARK_TGF_BETA_SIGNALING	0.0491534	REACTOME_ANTIVIRAL_MECHANISM_BY_IFN_STIMULATED_GENES	0.301842
HALLMARK_COMPLEMENT	0.0570554	REACTOME_DIABETES_PATHWAYS	0.301842
HALLMARK_MTORC1_SIGNALING	0.0570554	PID_INTEGRIN1_PATHWAY	0.327918
HALLMARK_UV_RESPONSE_UP	0.0570554	REACTOME_PPARA_ACTIVATES_GENE_EXPRESSION	0.388138
HALLMARK_COAGULATION	0.090346	PID_HIF1_TFPATHWAY	0.391515
HALLMARK_UNFOLDED_PROTEIN_RESPONSE	0.105097	REACTOME_CIRCADIAN_REPRESSION_OF_EXPRESSION_BY_REV_ERBA	0.391515
HALLMARK_G2M_CHECKPOINT	0.131303	REACTOME_RORA_ACTIVATES_CIRCADIAN_EXPRESSION	0.482701
HALLMARK_MITOTIC_SPINDLE	0.177999	PID_WNT_SIGNALING_PATHWAY	0.487151
HALLMARK_MYC_TARGETS_V1	0.177999	REACTOME_TRANSPORT_OF_MATURE_TRANSCRIPT_TO_CYTOPLASM	0.487151
HALLMARK_OXIDATIVE_PHOSPHORYLATION	0.177999	REACTOME_ACTIVATION_OF_CHAPERONE_GENES_BY_ATF6_ALPHA	0.487151
HALLMARK_NOTCH_SIGNALING	0.190058	REACTOME_INTERFERON_SIGNALING	0.494623
HALLMARK_UV_RESPONSE_DN	0.208901	KEGG_MAPK_SIGNALING_PATHWAY	0.528807
HALLMARK_ANGIOGENESIS	0.251816	REACTOME_NEGATIVE_REGULATORS_OF_RIG_I_MDA5_SIGNALING	0.528807
HALLMARK_APICAL_JUNCTION	0.254695	BIOCARTA_VITCB_PATHWAY	0.575035
HALLMARK_HEME_METABOLISM	0.274644	PID_INTEGRIN4_PATHWAY	0.575035
HALLMARK_KRAS_SIGNALING_DN	0.274644	REACTOME_ACTIVATION_OF_CHAPERONES_BY_ATF6_ALPHA	0.575035
HALLMARK_REACTIVE_OXIGEN_SPECIES_PATHWAY	0.310642	REACTOME_MRNA_3_END_PROCESSING	0.614854
HALLMARK_ANDROGEN_RESPONSE	0.390102	REACTOME_AMYLOIDS	0.628702
HALLMARK_ADIPOGENESIS	0.583162	KEGG_ACUTE_MYELOID_LEUKEMIA	0.667996
HALLMARK_E2F_TARGETS	0.583162	PID_ATF2_PATHWAY	0.667996
HALLMARK_SPERMATOGENESIS	0.6995	REACTOME_INTERFERON_ALPHA_BETA_SIGNALING	0.667996
HALLMARK_XENOBIOTIC_METABOLISM	0.820412	NABA_BASEMENT_MEMBRANES	0.667996
HALLMARK_DNA_REPAIR	0.996729	REACTOME_CLEAVAGE_OF_GROWING_TRANSCRIPT_IN_THE_TERMINATION_REGION_	0.787315
HALLMARK_FATTY_ACID_METABOLISM	0.996729	REACTOME_RNA_POL_I_PROMOTER_OPENING	0.812466
HALLMARK_CHOLESTEROL_HOMEOSTASIS	1	REACTOME_RIG_I_MDA5_MEDIATED_INDUCTION_OF_IFN_ALPHA_BETA_PATHWAYS	0.812466
HALLMARK_WNT_BETA_CATENIN_SIGNALING	1	PID_TCR_RAS_PATHWAY	0.825841
HALLMARK_IL6_JAK_STAT3_SIGNALING	1	KEGG_GLYCOLYSIS_GLUCONEOGENESIS	1
HALLMARK_PROTEIN_SECRETION	1	KEGG_CITRATE_CYCLE_TCA_CYCLE	1
HALLMARK_APICAL_SURFACE	1	KEGG_PENTOSE_PHOSPHATE_PATHWAY	1
HALLMARK_HEDGEHOG_SIGNALING	1	KEGG_PENTOSE_AND_GLUCURONATE_INTERCONVERSIONS	1
HALLMARK_PI3K_AKT_MTOR_SIGNALING	1	KEGG_FRUCTOSE_AND_MANNOSE_METABOLISM	1
HALLMARK_MYC_TARGETS_V2	1	KEGG_GALACTOSE_METABOLISM	1
HALLMARK_INFLAMMATORY_RESPONSE	1	KEGG_ASCORBATE_AND_ALDARATE_METABOLISM	1
HALLMARK_BILE_ACID_METABOLISM	1	KEGG_FATTY_ACID_METABOLISM	1
HALLMARK_PEROXISOME	1	KEGG_STEROID_BIOSYNTHESIS	1
HALLMARK_ALLOGRAFT_REJECTION	1	KEGG_PRIMARY_BILE_ACID_BIOSYNTHESIS	1
HALLMARK_PANCREAS_BETA_CELLS	1	KEGG_STEROID_HORMONE_BIOSYNTHESIS	1
		KEGG_OXIDATIVE_PHOSPHORYLATION	1
		KEGG_PURINE_METABOLISM	1
		KEGG_PYRIMIDINE_METABOLISM	1
		KEGG_ALANINE_ASPARTATE_AND_GLUTAMATE_METABOLISM	1
		KEGG_GLYCINE_SERINE_AND_THREONINE_METABOLISM	1
		KEGG_CYSTEINE_AND_METHIONINE_METABOLISM	1
		KEGG_VALINE_LEUCINE_AND_ISOLEUCINE_DEGRADATION	1
		KEGG_VALINE_LEUCINE_AND_ISOLEUCINE_BIOSYNTHESIS	1
		KEGG_LYSINE_DEGRADATION	1
		KEGG_ARGININE_AND_PROLINE_METABOLISM	1
		KEGG_HISTIDINE_METABOLISM	1
		KEGG_TYROSINE_METABOLISM	1
		KEGG_PHENYLALANINE_METABOLISM	1
		KEGG_TRYPTOPHAN_METABOLISM	1
		KEGG_BETA_ALANINE_METABOLISM	1
		KEGG_TAURINE_AND_HYPOTAURINE_METABOLISM	1
		KEGG_SELENOAMINO_ACID_METABOLISM	1
		KEGG_GLUTATHIONE_METABOLISM	1
		KEGG_STARCH_AND_SUCROSE_METABOLISM	1
		KEGG_N_GLYCAN_BIOSYNTHESIS	1
		KEGG_OTHER_GLYCAN_DEGRADATION	1
		KEGG_O_GLYCAN_BIOSYNTHESIS	1
		KEGG_AMINO_SUGAR_AND_NUCLEOTIDE_SUGAR_METABOLISM	1
		KEGG_GLYCOSAMINOGLYCAN_DEGRADATION	1
		KEGG_GLYCOSAMINOGLYCAN_BIOSYNTHESIS_CHONDROITIN_SULFATE	1
		KEGG_GLYCOSAMINOGLYCAN_BIOSYNTHESIS_KERATAN_SULFATE	1
		KEGG_GLYCOSAMINOGLYCAN_BIOSYNTHESIS_HEPARAN_SULFATE	1
		KEGG_GLYCEROLIPID_METABOLISM	1
		KEGG_INOSITOL_PHOSPHATE_METABOLISM	1
		KEGG_GLYCOSYLPHOSPHATIDYLINOSITOL_GPI_ANCHOR_BIOSYNTHESIS	1
		KEGG_GLYCEROPHOSPHOLIPID_METABOLISM	1
		KEGG_ETHER_LIPID_METABOLISM	1
		KEGG_ARACHIDONIC_ACID_METABOLISM	1
		KEGG_LINOLEIC_ACID_METABOLISM	1
		KEGG_ALPHA_LINOLENIC_ACID_METABOLISM	1
		KEGG_SPHINGOLIPID_METABOLISM	1
		KEGG_GLYCOSPHINGOLIPID_BIOSYNTHESIS_LACTO_AND_NEOLACTO_SERIES	1
		KEGG_GLYCOSPHINGOLIPID_BIOSYNTHESIS_GLOBO_SERIES	1
		KEGG_GLYCOSPHINGOLIPID_BIOSYNTHESIS_GANGLIO_SERIES	1
		KEGG_PYRUVATE_METABOLISM	1
		KEGG_GLYOXYLATE_AND_DICARBOXYLATE_METABOLISM	1
		KEGG_PROPANOATE_METABOLISM	1
		KEGG_BUTANOATE_METABOLISM	1
		KEGG_ONE_CARBON_POOL_BY_FOLATE	1
		KEGG_RIBOFLAVIN_METABOLISM	1
		KEGG_NICOTINATE_AND_NICOTINAMIDE_METABOLISM	1
		KEGG_PANTOTHENATE_AND_COA_BIOSYNTHESIS	1
		KEGG_FOLATE_BIOSYNTHESIS	1
		KEGG_RETINOL_METABOLISM	1
		KEGG_PORPHYRIN_AND_CHLOROPHYLL_METABOLISM	1
		KEGG_TERPENOID_BACKBONE_BIOSYNTHESIS	1
		KEGG_LIMONENE_AND_PINENE_DEGRADATION	1
		KEGG_NITROGEN_METABOLISM	1
		KEGG_SULFUR_METABOLISM	1
		KEGG_AMINOACYL_TRNA_BIOSYNTHESIS	1
		KEGG_METABOLISM_OF_XENOBIOTICS_BY_CYTOCHROME_P450	1
		KEGG_DRUG_METABOLISM_CYTOCHROME_P450	1
		KEGG_DRUG_METABOLISM_OTHER_ENZYMES	1
		KEGG_BIOSYNTHESIS_OF_UNSATURATED_FATTY_ACIDS	1
		KEGG_ABC_TRANSPORTERS	1
		KEGG_RIBOSOME	1
		KEGG_RNA_DEGRADATION	1
		KEGG_RNA_POLYMERASE	1
		KEGG_BASAL_TRANSCRIPTION_FACTORS	1
		KEGG_DNA_REPLICATION	1
		KEGG_SPLICEOSOME	1
		KEGG_PROTEASOME	1
		KEGG_PROTEIN_EXPORT	1
		KEGG_PPAR_SIGNALING_PATHWAY	1
		KEGG_BASE_EXCISION_REPAIR	1
		KEGG_NUCLEOTIDE_EXCISION_REPAIR	1
		KEGG_MISMATCH_REPAIR	1
		KEGG_HOMOLOGOUS_RECOMBINATION	1
		KEGG_NON_HOMOLOGOUS_END_JOINING	1
		KEGG_ERBB_SIGNALING_PATHWAY	1
		KEGG_CALCIUM_SIGNALING_PATHWAY	1
		KEGG_CYTOKINE_CYTOKINE_RECEPTOR_INTERACTION	1
		KEGG_CHEMOKINE_SIGNALING_PATHWAY	1
		KEGG_PHOSPHATIDYLINOSITOL_SIGNALING_SYSTEM	1
		KEGG_NEUROACTIVE_LIGAND_RECEPTOR_INTERACTION	1
		KEGG_CELL_CYCLE	1
		KEGG_OOCYTE_MEIOSIS	1
		KEGG_P53_SIGNALING_PATHWAY	1
		KEGG_UBIQUITIN_MEDIATED_PROTEOLYSIS	1
		KEGG_SNARE_INTERACTIONS_IN_VESICULAR_TRANSPORT	1
		KEGG_REGULATION_OF_AUTOPHAGY	1
		KEGG_LYSOSOME	1
		KEGG_ENDOCYTOSIS	1
		KEGG_PEROXISOME	1
		KEGG_MTOR_SIGNALING_PATHWAY	1
		KEGG_APOPTOSIS	1
		KEGG_CARDIAC_MUSCLE_CONTRACTION	1
		KEGG_VASCULAR_SMOOTH_MUSCLE_CONTRACTION	1
		KEGG_WNT_SIGNALING_PATHWAY	1
		KEGG_DORSO_VENTRAL_AXIS_FORMATION	1
		KEGG_NOTCH_SIGNALING_PATHWAY	1
		KEGG_HEDGEHOG_SIGNALING_PATHWAY	1
		KEGG_TGF_BETA_SIGNALING_PATHWAY	1
		KEGG_AXON_GUIDANCE	1
		KEGG_VEGF_SIGNALING_PATHWAY	1
		KEGG_FOCAL_ADHESION	1
		KEGG_ECM_RECEPTOR_INTERACTION	1
		KEGG_CELL_ADHESION_MOLECULES_CAMS	1
		KEGG_ADHERENS_JUNCTION	1
		KEGG_TIGHT_JUNCTION	1
		KEGG_GAP_JUNCTION	1
		KEGG_COMPLEMENT_AND_COAGULATION_CASCADES	1
		KEGG_ANTIGEN_PROCESSING_AND_PRESENTATION	1
		KEGG_RENIN_ANGIOTENSIN_SYSTEM	1
		KEGG_TOLL_LIKE_RECEPTOR_SIGNALING_PATHWAY	1
		KEGG_NOD_LIKE_RECEPTOR_SIGNALING_PATHWAY	1
		KEGG_RIG_I_LIKE_RECEPTOR_SIGNALING_PATHWAY	1
		KEGG_CYTOSOLIC_DNA_SENSING_PATHWAY	1
		KEGG_JAK_STAT_SIGNALING_PATHWAY	1
		KEGG_HEMATOPOIETIC_CELL_LINEAGE	1
		KEGG_NATURAL_KILLER_CELL_MEDIATED_CYTOTOXICITY	1
		KEGG_T_CELL_RECEPTOR_SIGNALING_PATHWAY	1
		KEGG_B_CELL_RECEPTOR_SIGNALING_PATHWAY	1
		KEGG_FC_EPSILON_RI_SIGNALING_PATHWAY	1
		KEGG_FC_GAMMA_R_MEDIATED_PHAGOCYTOSIS	1
		KEGG_LEUKOCYTE_TRANSENDOTHELIAL_MIGRATION	1
		KEGG_INTESTINAL_IMMUNE_NETWORK_FOR_IGA_PRODUCTION	1
		KEGG_LONG_TERM_POTENTIATION	1
		KEGG_NEUROTROPHIN_SIGNALING_PATHWAY	1
		KEGG_LONG_TERM_DEPRESSION	1
		KEGG_OLFACTORY_TRANSDUCTION	1
		KEGG_TASTE_TRANSDUCTION	1
		KEGG_REGULATION_OF_ACTIN_CYTOSKELETON	1
		KEGG_INSULIN_SIGNALING_PATHWAY	1
		KEGG_GNRH_SIGNALING_PATHWAY	1
		KEGG_PROGESTERONE_MEDIATED_OOCYTE_MATURATION	1
		KEGG_MELANOGENESIS	1
		KEGG_ADIPOCYTOKINE_SIGNALING_PATHWAY	1
		KEGG_TYPE_II_DIABETES_MELLITUS	1
		KEGG_TYPE_I_DIABETES_MELLITUS	1
		KEGG_MATURITY_ONSET_DIABETES_OF_THE_YOUNG	1
		KEGG_ALDOSTERONE_REGULATED_SODIUM_REABSORPTION	1
		KEGG_VASOPRESSIN_REGULATED_WATER_REABSORPTION	1
		KEGG_PROXIMAL_TUBULE_BICARBONATE_RECLAMATION	1
		KEGG_ALZHEIMERS_DISEASE	1
		KEGG_PARKINSONS_DISEASE	1
		KEGG_AMYOTROPHIC_LATERAL_SCLEROSIS_ALS	1
		KEGG_HUNTINGTONS_DISEASE	1
		KEGG_PRION_DISEASES	1
		KEGG_VIBRIO_CHOLERAE_INFECTION	1
		KEGG_EPITHELIAL_CELL_SIGNALING_IN_HELICOBACTER_PYLORI_INFECTION	1
		KEGG_PATHOGENIC_ESCHERICHIA_COLI_INFECTION	1
		KEGG_LEISHMANIA_INFECTION	1
		KEGG_PATHWAYS_IN_CANCER	1
		KEGG_COLORECTAL_CANCER	1
		KEGG_RENAL_CELL_CARCINOMA	1
		KEGG_PANCREATIC_CANCER	1
		KEGG_ENDOMETRIAL_CANCER	1
		KEGG_GLIOMA	1
		KEGG_PROSTATE_CANCER	1
		KEGG_THYROID_CANCER	1
		KEGG_BASAL_CELL_CARCINOMA	1
		KEGG_MELANOMA	1
		KEGG_BLADDER_CANCER	1
		KEGG_CHRONIC_MYELOID_LEUKEMIA	1
		KEGG_SMALL_CELL_LUNG_CANCER	1
		KEGG_NON_SMALL_CELL_LUNG_CANCER	1
		KEGG_ASTHMA	1
		KEGG_AUTOIMMUNE_THYROID_DISEASE	1
		KEGG_SYSTEMIC_LUPUS_ERYTHEMATOSUS	1
		KEGG_ALLOGRAFT_REJECTION	1
		KEGG_GRAFT_VERSUS_HOST_DISEASE	1
		KEGG_PRIMARY_IMMUNODEFICIENCY	1
		KEGG_HYPERTROPHIC_CARDIOMYOPATHY_HCM	1
		KEGG_ARRHYTHMOGENIC_RIGHT_VENTRICULAR_CARDIOMYOPATHY_ARVC	1
		KEGG_DILATED_CARDIOMYOPATHY	1
		KEGG_VIRAL_MYOCARDITIS	1
		BIOCARTA_RELA_PATHWAY	1
		BIOCARTA_NO1_PATHWAY	1
		BIOCARTA_CSK_PATHWAY	1
		BIOCARTA_SRCRPTP_PATHWAY	1
		BIOCARTA_AMI_PATHWAY	1
		BIOCARTA_GRANULOCYTES_PATHWAY	1
		BIOCARTA_LYM_PATHWAY	1
		BIOCARTA_ARAP_PATHWAY	1
		BIOCARTA_AGR_PATHWAY	1
		BIOCARTA_AKAP95_PATHWAY	1
		BIOCARTA_AKT_PATHWAY	1
		BIOCARTA_ALK_PATHWAY	1
		BIOCARTA_AT1R_PATHWAY	1
		BIOCARTA_ACE2_PATHWAY	1
		BIOCARTA_ASBCELL_PATHWAY	1
		BIOCARTA_DNAFRAGMENT_PATHWAY	1
		BIOCARTA_CHEMICAL_PATHWAY	1
		BIOCARTA_SPPA_PATHWAY	1
		BIOCARTA_ATM_PATHWAY	1
		BIOCARTA_AGPCR_PATHWAY	1
		BIOCARTA_BCELLSURVIVAL_PATHWAY	1
		BIOCARTA_BLYMPHOCYTE_PATHWAY	1
		BIOCARTA_BCR_PATHWAY	1
		BIOCARTA_BIOPEPTIDES_PATHWAY	1
		BIOCARTA_NEUROTRANSMITTERS_PATHWAY	1
		BIOCARTA_RANKL_PATHWAY	1
		BIOCARTA_CACAM_PATHWAY	1
		BIOCARTA_CDMAC_PATHWAY	1
		BIOCARTA_CARM_ER_PATHWAY	1
		BIOCARTA_CASPASE_PATHWAY	1
		BIOCARTA_CBL_PATHWAY	1
		BIOCARTA_CCR3_PATHWAY	1
		BIOCARTA_CD40_PATHWAY	1
		BIOCARTA_MCM_PATHWAY	1
		BIOCARTA_G1_PATHWAY	1
		BIOCARTA_G2_PATHWAY	1
		BIOCARTA_CELL2CELL_PATHWAY	1
		BIOCARTA_LAIR_PATHWAY	1
		BIOCARTA_CERAMIDE_PATHWAY	1
		BIOCARTA_TID_PATHWAY	1
		BIOCARTA_CLASSIC_PATHWAY	1
		BIOCARTA_COMP_PATHWAY	1
		BIOCARTA_VDR_PATHWAY	1
		BIOCARTA_HDAC_PATHWAY	1
		BIOCARTA_GCR_PATHWAY	1
		BIOCARTA_CTCF_PATHWAY	1
		BIOCARTA_CTL_PATHWAY	1
		BIOCARTA_CXCR4_PATHWAY	1
		BIOCARTA_CELLCYCLE_PATHWAY	1
		BIOCARTA_CFTR_PATHWAY	1
		BIOCARTA_CYTOKINE_PATHWAY	1
		BIOCARTA_INFLAM_PATHWAY	1
		BIOCARTA_D4GDI_PATHWAY	1
		BIOCARTA_DC_PATHWAY	1
		BIOCARTA_P35ALZHEIMERS_PATHWAY	1
		BIOCARTA_RNA_PATHWAY	1
		BIOCARTA_MTA3_PATHWAY	1
		BIOCARTA_SKP2E2F_PATHWAY	1
		BIOCARTA_CALCINEURIN_PATHWAY	1
		BIOCARTA_EGF_PATHWAY	1
		BIOCARTA_ETC_PATHWAY	1
		BIOCARTA_NDKDYNAMIN_PATHWAY	1
		BIOCARTA_EPHA4_PATHWAY	1
		BIOCARTA_EPO_PATHWAY	1
		BIOCARTA_ECM_PATHWAY	1
		BIOCARTA_ERK_PATHWAY	1
		BIOCARTA_ERYTH_PATHWAY	1
		BIOCARTA_EPONFKB_PATHWAY	1
		BIOCARTA_EIF_PATHWAY	1
		BIOCARTA_EXTRINSIC_PATHWAY	1
		BIOCARTA_FAS_PATHWAY	1
		BIOCARTA_FCER1_PATHWAY	1
		BIOCARTA_FEEDER_PATHWAY	1
		BIOCARTA_FIBRINOLYSIS_PATHWAY	1
		BIOCARTA_FMLP_PATHWAY	1
		BIOCARTA_FREE_PATHWAY	1
		BIOCARTA_GABA_PATHWAY	1
		BIOCARTA_GATA3_PATHWAY	1
		BIOCARTA_GLYCOLYSIS_PATHWAY	1
		BIOCARTA_SET_PATHWAY	1
		BIOCARTA_GH_PATHWAY	1
		BIOCARTA_AHSP_PATHWAY	1
		BIOCARTA_TCAPOPTOSIS_PATHWAY	1
		BIOCARTA_HIVNEF_PATHWAY	1
		BIOCARTA_SALMONELLA_PATHWAY	1
		BIOCARTA_MPR_PATHWAY	1
		BIOCARTA_HCMV_PATHWAY	1
		BIOCARTA_P53HYPOXIA_PATHWAY	1
		BIOCARTA_HIF_PATHWAY	1
		BIOCARTA_IGF1_PATHWAY	1
		BIOCARTA_IL17_PATHWAY	1
		BIOCARTA_IL2_PATHWAY	1
		BIOCARTA_IL3_PATHWAY	1
		BIOCARTA_IL4_PATHWAY	1
		BIOCARTA_IL5_PATHWAY	1
		BIOCARTA_IL6_PATHWAY	1
		BIOCARTA_IL10_PATHWAY	1
		BIOCARTA_IL12_PATHWAY	1
		BIOCARTA_IL2RB_PATHWAY	1
		BIOCARTA_IL22BP_PATHWAY	1
		BIOCARTA_IL7_PATHWAY	1
		BIOCARTA_GSK3_PATHWAY	1
		BIOCARTA_DEATH_PATHWAY	1
		BIOCARTA_RACCYCD_PATHWAY	1
		BIOCARTA_GLEEVEC_PATHWAY	1
		BIOCARTA_INSULIN_PATHWAY	1
		BIOCARTA_INTEGRIN_PATHWAY	1
		BIOCARTA_INTRINSIC_PATHWAY	1
		BIOCARTA_KERATINOCYTE_PATHWAY	1
		BIOCARTA_TCRA_PATHWAY	1
		BIOCARTA_LECTIN_PATHWAY	1
		BIOCARTA_PYK2_PATHWAY	1
		BIOCARTA_EGFR_SMRTE_PATHWAY	1
		BIOCARTA_MAPK_PATHWAY	1
		BIOCARTA_MCALPAIN_PATHWAY	1
		BIOCARTA_PPARA_PATHWAY	1
		BIOCARTA_ETS_PATHWAY	1
		BIOCARTA_MONOCYTE_PATHWAY	1
		BIOCARTA_MTOR_PATHWAY	1
		BIOCARTA_IGF1R_PATHWAY	1
		BIOCARTA_PITX2_PATHWAY	1
		BIOCARTA_NGF_PATHWAY	1
		BIOCARTA_VIP_PATHWAY	1
		BIOCARTA_NFAT_PATHWAY	1
		BIOCARTA_NTHI_PATHWAY	1
		BIOCARTA_NFKB_PATHWAY	1
		BIOCARTA_NOS1_PATHWAY	1
		BIOCARTA_NO2IL12_PATHWAY	1
		BIOCARTA_RARRXR_PATHWAY	1
		BIOCARTA_NUCLEARRS_PATHWAY	1
		BIOCARTA_ARENRF2_PATHWAY	1
		BIOCARTA_P38MAPK_PATHWAY	1
		BIOCARTA_P53_PATHWAY	1
		BIOCARTA_PDGF_PATHWAY	1
		BIOCARTA_CCR5_PATHWAY	1
		BIOCARTA_PTDINS_PATHWAY	1
		BIOCARTA_PLCE_PATHWAY	1
		BIOCARTA_EDG1_PATHWAY	1
		BIOCARTA_CDK5_PATHWAY	1
		BIOCARTA_MYOSIN_PATHWAY	1
		BIOCARTA_PLATELETAPP_PATHWAY	1
		BIOCARTA_PS1_PATHWAY	1
		BIOCARTA_PROTEASOME_PATHWAY	1
		BIOCARTA_AKAPCENTROSOME_PATHWAY	1
		BIOCARTA_PTEN_PATHWAY	1
		BIOCARTA_RAB_PATHWAY	1
		BIOCARTA_RAC1_PATHWAY	1
		BIOCARTA_RAS_PATHWAY	1
		BIOCARTA_NKCELLS_PATHWAY	1
		BIOCARTA_RB_PATHWAY	1
		BIOCARTA_CHREBP2_PATHWAY	1
		BIOCARTA_BAD_PATHWAY	1
		BIOCARTA_CK1_PATHWAY	1
		BIOCARTA_EIF2_PATHWAY	1
		BIOCARTA_EIF4_PATHWAY	1
		BIOCARTA_STEM_PATHWAY	1
		BIOCARTA_P27_PATHWAY	1
		BIOCARTA_PGC1A_PATHWAY	1
		BIOCARTA_PML_PATHWAY	1
		BIOCARTA_DREAM_PATHWAY	1
		BIOCARTA_LEPTIN_PATHWAY	1
		BIOCARTA_RHO_PATHWAY	1
		BIOCARTA_AKAP13_PATHWAY	1
		BIOCARTA_ATRBRCA_PATHWAY	1
		BIOCARTA_CARDIACEGF_PATHWAY	1
		BIOCARTA_HER2_PATHWAY	1
		BIOCARTA_ERK5_PATHWAY	1
		BIOCARTA_MAL_PATHWAY	1
		BIOCARTA_MEF2D_PATHWAY	1
		BIOCARTA_MITOCHONDRIA_PATHWAY	1
		BIOCARTA_ACH_PATHWAY	1
		BIOCARTA_PARKIN_PATHWAY	1
		BIOCARTA_CDC42RAC_PATHWAY	1
		BIOCARTA_RANMS_PATHWAY	1
		BIOCARTA_BARR_MAPK_PATHWAY	1
		BIOCARTA_TOB1_PATHWAY	1
		BIOCARTA_BARRESTIN_SRC_PATHWAY	1
		BIOCARTA_NKT_PATHWAY	1
		BIOCARTA_IL1R_PATHWAY	1
		BIOCARTA_MET_PATHWAY	1
		BIOCARTA_GPCR_PATHWAY	1
		BIOCARTA_IGF1MTOR_PATHWAY	1
		BIOCARTA_SODD_PATHWAY	1
		BIOCARTA_SHH_PATHWAY	1
		BIOCARTA_PTC1_PATHWAY	1
		BIOCARTA_SPRY_PATHWAY	1
		BIOCARTA_BARRESTIN_PATHWAY	1
		BIOCARTA_STATHMIN_PATHWAY	1
		BIOCARTA_HSP27_PATHWAY	1
		BIOCARTA_TCR_PATHWAY	1
		BIOCARTA_TCYTOTOXIC_PATHWAY	1
		BIOCARTA_THELPER_PATHWAY	1
		BIOCARTA_TALL1_PATHWAY	1
		BIOCARTA_TEL_PATHWAY	1
		BIOCARTA_TGFB_PATHWAY	1
		BIOCARTA_TH1TH2_PATHWAY	1
		BIOCARTA_41BB_PATHWAY	1
		BIOCARTA_KREB_PATHWAY	1
		BIOCARTA_CTLA4_PATHWAY	1
		BIOCARTA_LONGEVITY_PATHWAY	1
		BIOCARTA_SARS_PATHWAY	1
		BIOCARTA_PAR1_PATHWAY	1
		BIOCARTA_STRESS_PATHWAY	1
		BIOCARTA_TNFR1_PATHWAY	1
		BIOCARTA_TNFR2_PATHWAY	1
		BIOCARTA_TOLL_PATHWAY	1
		BIOCARTA_TPO_PATHWAY	1
		BIOCARTA_CREB_PATHWAY	1
		BIOCARTA_CARM1_PATHWAY	1
		BIOCARTA_TFF_PATHWAY	1
		BIOCARTA_TRKA_PATHWAY	1
		BIOCARTA_ARF_PATHWAY	1
		BIOCARTA_UCALPAIN_PATHWAY	1
		BIOCARTA_VEGF_PATHWAY	1
		BIOCARTA_WNT_PATHWAY	1
		BIOCARTA_ACTINY_PATHWAY	1
		ST_INTERFERON_GAMMA_PATHWAY	1
		ST_WNT_CA2_CYCLIC_GMP_PATHWAY	1
		ST_DIFFERENTIATION_PATHWAY_IN_PC12_CELLS	1
		ST_TUMOR_NECROSIS_FACTOR_PATHWAY	1
		SA_B_CELL_RECEPTOR_COMPLEXES	1
		ST_ERK1_ERK2_MAPK_PATHWAY	1
		SIG_CD40PATHWAYMAP	1
		SIG_PIP3_SIGNALING_IN_CARDIAC_MYOCTES	1
		SA_CASPASE_CASCADE	1
		ST_GA12_PATHWAY	1
		ST_G_ALPHA_S_PATHWAY	1
		ST_G_ALPHA_I_PATHWAY	1
		SIG_CHEMOTAXIS	1
		ST_IL_13_PATHWAY	1
		ST_P38_MAPK_PATHWAY	1
		SIG_IL4RECEPTOR_IN_B_LYPHOCYTES	1
		WNT_SIGNALING	1
		ST_JAK_STAT_PATHWAY	1
		SIG_REGULATION_OF_THE_ACTIN_CYTOSKELETON_BY_RHO_GTPASES	1
		ST_GRANULE_CELL_SURVIVAL_PATHWAY	1
		ST_ADRENERGIC	1
		ST_INTEGRIN_SIGNALING_PATHWAY	1
		ST_GAQ_PATHWAY	1
		ST_GA13_PATHWAY	1
		ST_STAT3_PATHWAY	1
		SA_FAS_SIGNALING	1
		SA_G1_AND_S_PHASES	1
		SIG_INSULIN_RECEPTOR_PATHWAY_IN_CARDIAC_MYOCYTES	1
		ST_T_CELL_SIGNAL_TRANSDUCTION	1
		ST_TYPE_I_INTERFERON_PATHWAY	1
		ST_PAC1_RECEPTOR_PATHWAY	1
		SIG_PIP3_SIGNALING_IN_B_LYMPHOCYTES	1
		SIG_BCR_SIGNALING_PATHWAY	1
		SA_G2_AND_M_PHASES	1
		ST_B_CELL_ANTIGEN_RECEPTOR	1
		ST_INTERLEUKIN_4_PATHWAY	1
		ST_WNT_BETA_CATENIN_PATHWAY	1
		SA_MMP_CYTOKINE_CONNECTION	1
		ST_JNK_MAPK_PATHWAY	1
		SA_PROGRAMMED_CELL_DEATH	1
		ST_FAS_SIGNALING_PATHWAY	1
		ST_MYOCYTE_AD_PATHWAY	1
		SA_PTEN_PATHWAY	1
		SA_REG_CASCADE_OF_CYCLIN_EXPR	1
		SA_TRKA_RECEPTOR	1
		ST_PHOSPHOINOSITIDE_3_KINASE_PATHWAY	1
		PID_FANCONI_PATHWAY	1
		PID_SMAD2_3NUCLEAR_PATHWAY	1
		PID_FCER1_PATHWAY	1
		PID_ENDOTHELIN_PATHWAY	1
		PID_BCR_5PATHWAY	1
		PID_PRL_SIGNALING_EVENTS_PATHWAY	1
		PID_RHOA_PATHWAY	1
		PID_ERBB4_PATHWAY	1
		PID_AURORA_B_PATHWAY	1
		PID_LYSOPHOSPHOLIPID_PATHWAY	1
		PID_INSULIN_PATHWAY	1
		PID_NOTCH_PATHWAY	1
		PID_P73PATHWAY	1
		PID_P38_MKK3_6PATHWAY	1
		PID_GMCSF_PATHWAY	1
		PID_WNT_NONCANONICAL_PATHWAY	1
		PID_NFKAPPAB_ATYPICAL_PATHWAY	1
		PID_IL4_2PATHWAY	1
		PID_HDAC_CLASSII_PATHWAY	1
		PID_BETA_CATENIN_DEG_PATHWAY	1
		PID_HDAC_CLASSIII_PATHWAY	1
		PID_GLYPICAN_1PATHWAY	1
		PID_TCR_PATHWAY	1
		PID_IL27_PATHWAY	1
		PID_NFKAPPAB_CANONICAL_PATHWAY	1
		PID_E2F_PATHWAY	1
		PID_ER_NONGENOMIC_PATHWAY	1
		PID_DNA_PK_PATHWAY	1
		PID_HIF2PATHWAY	1
		PID_CD40_PATHWAY	1
		PID_ATR_PATHWAY	1
		PID_INTEGRIN_CS_PATHWAY	1
		PID_MET_PATHWAY	1
		PID_PTP1B_PATHWAY	1
		PID_INTEGRIN3_PATHWAY	1
		PID_IL12_2PATHWAY	1
		PID_S1P_S1P3_PATHWAY	1
		PID_LPA4_PATHWAY	1
		PID_AR_PATHWAY	1
		PID_NFAT_TFPATHWAY	1
		PID_EPHB_FWD_PATHWAY	1
		PID_AVB3_OPN_PATHWAY	1
		PID_S1P_S1P4_PATHWAY	1
		PID_FRA_PATHWAY	1
		PID_MYC_ACTIV_PATHWAY	1
		PID_ARF6_TRAFFICKING_PATHWAY	1
		PID_RHOA_REG_PATHWAY	1
		PID_REELIN_PATHWAY	1
		PID_PS1_PATHWAY	1
		PID_ILK_PATHWAY	1
		PID_NECTIN_PATHWAY	1
		PID_P38_ALPHA_BETA_PATHWAY	1
		PID_TRAIL_PATHWAY	1
		PID_CDC42_PATHWAY	1
		PID_RET_PATHWAY	1
		PID_CDC42_REG_PATHWAY	1
		PID_ATM_PATHWAY	1
		PID_ARF6_PATHWAY	1
		PID_LKB1_PATHWAY	1
		PID_CD8_TCR_PATHWAY	1
		PID_WNT_CANONICAL_PATHWAY	1
		PID_TCPTP_PATHWAY	1
		PID_ANGIOPOIETIN_RECEPTOR_PATHWAY	1
		PID_FAS_PATHWAY	1
		PID_TXA2PATHWAY	1
		PID_SHP2_PATHWAY	1
		PID_HDAC_CLASSI_PATHWAY	1
		PID_S1P_S1P1_PATHWAY	1
		PID_TELOMERASE_PATHWAY	1
		PID_HNF3B_PATHWAY	1
		PID_NETRIN_PATHWAY	1
		PID_IL1_PATHWAY	1
		PID_NFAT_3PATHWAY	1
		PID_REG_GR_PATHWAY	1
		PID_CONE_PATHWAY	1
		PID_INTEGRIN_A9B1_PATHWAY	1
		PID_ERB_GENOMIC_PATHWAY	1
		PID_ARF6_DOWNSTREAM_PATHWAY	1
		PID_MTOR_4PATHWAY	1
		PID_IL2_1PATHWAY	1
		PID_CXCR4_PATHWAY	1
		PID_IGF1_PATHWAY	1
		PID_ERBB1_RECEPTOR_PROXIMAL_PATHWAY	1
		PID_TNF_PATHWAY	1
		PID_PLK1_PATHWAY	1
		PID_IL5_PATHWAY	1
		PID_FOXO_PATHWAY	1
		PID_VEGF_VEGFR_PATHWAY	1
		PID_THROMBIN_PAR4_PATHWAY	1
		PID_MYC_PATHWAY	1
		PID_RANBP2_PATHWAY	1
		PID_PI3KCI_PATHWAY	1
		PID_AJDISS_2PATHWAY	1
		PID_IL2_PI3K_PATHWAY	1
		PID_CERAMIDE_PATHWAY	1
		PID_P53_DOWNSTREAM_PATHWAY	1
		PID_AR_TF_PATHWAY	1
		PID_P75_NTR_PATHWAY	1
		PID_S1P_META_PATHWAY	1
		PID_ECADHERIN_NASCENT_AJ_PATHWAY	1
		PID_AMB2_NEUTROPHILS_PATHWAY	1
		PID_AVB3_INTEGRIN_PATHWAY	1
		PID_IFNG_PATHWAY	1
		PID_RXR_VDR_PATHWAY	1
		PID_LIS1_PATHWAY	1
		PID_ERBB1_DOWNSTREAM_PATHWAY	1
		PID_SYNDECAN_4_PATHWAY	1
		PID_AP1_PATHWAY	1
		PID_INTEGRIN2_PATHWAY	1
		PID_UPA_UPAR_PATHWAY	1
		PID_ERBB2_ERBB3_PATHWAY	1
		PID_FOXM1_PATHWAY	1
		PID_EPHA_FWDPATHWAY	1
		PID_HIF1A_PATHWAY	1
		PID_BMP_PATHWAY	1
		PID_IL3_PATHWAY	1
		PID_IL6_7_PATHWAY	1
		PID_ECADHERIN_KERATINOCYTE_PATHWAY	1
		PID_ALK1_PATHWAY	1
		PID_PDGFRB_PATHWAY	1
		PID_TRKR_PATHWAY	1
		PID_TCR_JNK_PATHWAY	1
		PID_NEPHRIN_NEPH1_PATHWAY	1
		PID_CMYB_PATHWAY	1
		PID_IL23_PATHWAY	1
		PID_HIV_NEF_PATHWAY	1
		PID_SYNDECAN_1_PATHWAY	1
		PID_P38_MK2_PATHWAY	1
		PID_ERA_GENOMIC_PATHWAY	1
		PID_ERBB_NETWORK_PATHWAY	1
		PID_ALK2_PATHWAY	1
		PID_RHODOPSIN_PATHWAY	1
		PID_PDGFRA_PATHWAY	1
		PID_RETINOIC_ACID_PATHWAY	1
		PID_P38_GAMMA_DELTA_PATHWAY	1
		PID_IL8_CXCR2_PATHWAY	1
		PID_HEDGEHOG_2PATHWAY	1
		PID_INTEGRIN5_PATHWAY	1
		PID_AR_NONGENOMIC_PATHWAY	1
		PID_ERBB1_INTERNALIZATION_PATHWAY	1
		PID_HEDGEHOG_GLI_PATHWAY	1
		PID_CASPASE_PATHWAY	1
		PID_CXCR3_PATHWAY	1
		PID_BETA_CATENIN_NUC_PATHWAY	1
		PID_VEGFR1_PATHWAY	1
		PID_SMAD2_3PATHWAY	1
		PID_P38_ALPHA_BETA_DOWNSTREAM_PATHWAY	1
		PID_KIT_PATHWAY	1
		PID_ECADHERIN_STABILIZATION_PATHWAY	1
		PID_EPO_PATHWAY	1
		PID_IL2_STAT5_PATHWAY	1
		PID_TCR_CALCIUM_PATHWAY	1
		PID_DELTA_NP63_PATHWAY	1
		PID_VEGFR1_2_PATHWAY	1
		PID_THROMBIN_PAR1_PATHWAY	1
		PID_A6B1_A6B4_INTEGRIN_PATHWAY	1
		PID_SYNDECAN_2_PATHWAY	1
		PID_RAC1_REG_PATHWAY	1
		PID_AURORA_A_PATHWAY	1
		PID_ARF_3PATHWAY	1
		PID_INSULIN_GLUCOSE_PATHWAY	1
		PID_PI3KCI_AKT_PATHWAY	1
		PID_SYNDECAN_3_PATHWAY	1
		PID_IL8_CXCR1_PATHWAY	1
		PID_TAP63_PATHWAY	1
		PID_EPHRINB_REV_PATHWAY	1
		PID_BARD1_PATHWAY	1
		PID_P53_REGULATION_PATHWAY	1
		PID_TOLL_ENDOGENOUS_PATHWAY	1
		PID_NCADHERIN_PATHWAY	1
		PID_ANTHRAX_PATHWAY	1
		PID_S1P_S1P2_PATHWAY	1
		PID_RAS_PATHWAY	1
		PID_MAPK_TRK_PATHWAY	1
		PID_PI3K_PLC_TRK_PATHWAY	1
		PID_CD8_TCR_DOWNSTREAM_PATHWAY	1
		PID_EPHA2_FWD_PATHWAY	1
		PID_LYMPH_ANGIOGENESIS_PATHWAY	1
		PID_ALPHA_SYNUCLEIN_PATHWAY	1
		PID_FGF_PATHWAY	1
		PID_INTEGRIN_A4B1_PATHWAY	1
		PID_RAC1_PATHWAY	1
		PID_RB_1PATHWAY	1
		PID_FAK_PATHWAY	1
		PID_HNF3A_PATHWAY	1
		PID_TGFBR_PATHWAY	1
		PID_HES_HEY_PATHWAY	1
		PID_IL12_STAT4_PATHWAY	1
		REACTOME_GLYCOGEN_BREAKDOWN_GLYCOGENOLYSIS	1
		REACTOME_TRANSLATION	1
		REACTOME_PYRIMIDINE_CATABOLISM	1
		REACTOME_RNA_POL_III_TRANSCRIPTION_INITIATION_FROM_TYPE_2_PROMOTER	1
		REACTOME_INHIBITION_OF_THE_PROTEOLYTIC_ACTIVITY_OF_APC_C_REQUIRED_FOR_THE_ONSET_OF_ANAPHASE_BY_MITOTIC_SPINDLE_CHECKPOINT_COMPONENTS	1
		REACTOME_PYRUVATE_METABOLISM_AND_CITRIC_ACID_TCA_CYCLE	1
		REACTOME_EXTRINSIC_PATHWAY_FOR_APOPTOSIS	1
		REACTOME_PTM_GAMMA_CARBOXYLATION_HYPUSINE_FORMATION_AND_ARYLSULFATASE_ACTIVATION	1
		REACTOME_APOPTOTIC_CLEAVAGE_OF_CELLULAR_PROTEINS	1
		REACTOME_RNA_POL_I_TRANSCRIPTION_TERMINATION	1
		REACTOME_FORMATION_OF_THE_TERNARY_COMPLEX_AND_SUBSEQUENTLY_THE_43S_COMPLEX	1
		REACTOME_ACTIVATION_OF_THE_PRE_REPLICATIVE_COMPLEX	1
		REACTOME_PROCESSING_OF_INTRONLESS_PRE_MRNAS	1
		REACTOME_GAP_JUNCTION_DEGRADATION	1
		REACTOME_BASE_EXCISION_REPAIR	1
		REACTOME_BILE_ACID_AND_BILE_SALT_METABOLISM	1
		REACTOME_SYNTHESIS_OF_BILE_ACIDS_AND_BILE_SALTS_VIA_7ALPHA_HYDROXYCHOLESTEROL	1
		REACTOME_RECYCLING_OF_BILE_ACIDS_AND_SALTS	1
		REACTOME_SIGNALING_BY_RHO_GTPASES	1
		REACTOME_SIGNALING_BY_WNT	1
		REACTOME_METABOLISM_OF_NON_CODING_RNA	1
		REACTOME_SYNTHESIS_OF_BILE_ACIDS_AND_BILE_SALTS_VIA_24_HYDROXYCHOLESTEROL	1
		REACTOME_SYNTHESIS_OF_BILE_ACIDS_AND_BILE_SALTS	1
		REACTOME_METABOLISM_OF_STEROID_HORMONES_AND_VITAMINS_A_AND_D	1
		REACTOME_ANDROGEN_BIOSYNTHESIS	1
		REACTOME_SIGNALLING_BY_NGF	1
		REACTOME_CTNNB1_PHOSPHORYLATION_CASCADE	1
		REACTOME_INSULIN_RECEPTOR_RECYCLING	1
		REACTOME_COPI_MEDIATED_TRANSPORT	1
		REACTOME_NEF_MEDIATED_DOWNREGULATION_OF_MHC_CLASS_I_COMPLEX_CELL_SURFACE_EXPRESSION	1
		REACTOME_SIGNALING_BY_SCF_KIT	1
		REACTOME_DEVELOPMENTAL_BIOLOGY	1
		REACTOME_CROSS_PRESENTATION_OF_SOLUBLE_EXOGENOUS_ANTIGENS_ENDOSOMES	1
		REACTOME_SIGNALING_BY_NODAL	1
		REACTOME_DAG_AND_IP3_SIGNALING	1
		REACTOME_SPRY_REGULATION_OF_FGF_SIGNALING	1
		REACTOME_TCA_CYCLE_AND_RESPIRATORY_ELECTRON_TRANSPORT	1
		REACTOME_ANTIGEN_PROCESSING_CROSS_PRESENTATION	1
		REACTOME_GROWTH_HORMONE_RECEPTOR_SIGNALING	1
		REACTOME_TRIF_MEDIATED_TLR3_SIGNALING	1
		REACTOME_CELL_CELL_COMMUNICATION	1
		REACTOME_ABCA_TRANSPORTERS_IN_LIPID_HOMEOSTASIS	1
		REACTOME_ENDOSOMAL_VACUOLAR_PATHWAY	1
		REACTOME_TETRAHYDROBIOPTERIN_BH4_SYNTHESIS_RECYCLING_SALVAGE_AND_REGULATION	1
		REACTOME_ER_PHAGOSOME_PATHWAY	1
		REACTOME_MEIOSIS	1
		REACTOME_NEGATIVE_REGULATION_OF_FGFR_SIGNALING	1
		REACTOME_G0_AND_EARLY_G1	1
		REACTOME_REGULATION_OF_KIT_SIGNALING	1
		REACTOME_MEMBRANE_TRAFFICKING	1
		REACTOME_NEF_MEDIATES_DOWN_MODULATION_OF_CELL_SURFACE_RECEPTORS_BY_RECRUITING_THEM_TO_CLATHRIN_ADAPTERS	1
		REACTOME_IMMUNOREGULATORY_INTERACTIONS_BETWEEN_A_LYMPHOID_AND_A_NON_LYMPHOID_CELL	1
		REACTOME_ACTIVATED_AMPK_STIMULATES_FATTY_ACID_OXIDATION_IN_MUSCLE	1
		REACTOME_VITAMIN_B5_PANTOTHENATE_METABOLISM	1
		REACTOME_BOTULINUM_NEUROTOXICITY	1
		REACTOME_METABOLISM_OF_VITAMINS_AND_COFACTORS	1
		REACTOME_TRANS_GOLGI_NETWORK_VESICLE_BUDDING	1
		REACTOME_PROTEOLYTIC_CLEAVAGE_OF_SNARE_COMPLEX_PROTEINS	1
		REACTOME_RESOLUTION_OF_AP_SITES_VIA_THE_MULTIPLE_NUCLEOTIDE_PATCH_REPLACEMENT_PATHWAY	1
		REACTOME_GAMMA_CARBOXYLATION_TRANSPORT_AND_AMINO_TERMINAL_CLEAVAGE_OF_PROTEINS	1
		REACTOME_IL_7_SIGNALING	1
		REACTOME_CELL_CYCLE	1
		REACTOME_SIGNALING_BY_ERBB4	1
		REACTOME_ORC1_REMOVAL_FROM_CHROMATIN	1
		REACTOME_O_LINKED_GLYCOSYLATION_OF_MUCINS	1
		REACTOME_SULFUR_AMINO_ACID_METABOLISM	1
		REACTOME_DOWNREGULATION_OF_ERBB2_ERBB3_SIGNALING	1
		REACTOME_PROLACTIN_RECEPTOR_SIGNALING	1
		REACTOME_SIGNALING_BY_ERBB2	1
		REACTOME_SPHINGOLIPID_DE_NOVO_BIOSYNTHESIS	1
		REACTOME_TERMINATION_OF_O_GLYCAN_BIOSYNTHESIS	1
		REACTOME_DEFENSINS	1
		REACTOME_SIGNALING_BY_CONSTITUTIVELY_ACTIVE_EGFR	1
		REACTOME_GRB2_EVENTS_IN_ERBB2_SIGNALING	1
		REACTOME_SIGNALING_BY_EGFR_IN_CANCER	1
		REACTOME_MEMBRANE_BINDING_AND_TARGETTING_OF_GAG_PROTEINS	1
		REACTOME_BETA_DEFENSINS	1
		REACTOME_SRP_DEPENDENT_COTRANSLATIONAL_PROTEIN_TARGETING_TO_MEMBRANE	1
		REACTOME_PI3K_EVENTS_IN_ERBB4_SIGNALING	1
		REACTOME_SHC1_EVENTS_IN_ERBB4_SIGNALING	1
		REACTOME_PI3K_EVENTS_IN_ERBB2_SIGNALING	1
		REACTOME_NUCLEAR_SIGNALING_BY_ERBB4	1
		REACTOME_GLYCOSPHINGOLIPID_METABOLISM	1
		REACTOME_ASSOCIATION_OF_LICENSING_FACTORS_WITH_THE_PRE_REPLICATIVE_COMPLEX	1
		REACTOME_RIP_MEDIATED_NFKB_ACTIVATION_VIA_DAI	1
		REACTOME_PRE_NOTCH_TRANSCRIPTION_AND_TRANSLATION	1
		REACTOME_DEGRADATION_OF_THE_EXTRACELLULAR_MATRIX	1
		REACTOME_MITOCHONDRIAL_PROTEIN_IMPORT	1
		REACTOME_SIGNALING_BY_HIPPO	1
		REACTOME_ACTIVATED_NOTCH1_TRANSMITS_SIGNAL_TO_THE_NUCLEUS	1
		REACTOME_TRAFFICKING_AND_PROCESSING_OF_ENDOSOMAL_TLR	1
		REACTOME_SIGNALING_BY_NOTCH4	1
		REACTOME_DOWNSTREAM_SIGNALING_EVENTS_OF_B_CELL_RECEPTOR_BCR	1
		REACTOME_ACTIVATION_OF_NF_KAPPAB_IN_B_CELLS	1
		REACTOME_ANTIGEN_ACTIVATES_B_CELL_RECEPTOR_LEADING_TO_GENERATION_OF_SECOND_MESSENGERS	1
		REACTOME_REGULATION_OF_COMPLEMENT_CASCADE	1
		REACTOME_YAP1_AND_WWTR1_TAZ_STIMULATED_GENE_EXPRESSION	1
		REACTOME_SIGNALING_BY_NOTCH2	1
		REACTOME_PRE_NOTCH_EXPRESSION_AND_PROCESSING	1
		REACTOME_SIGNALING_BY_THE_B_CELL_RECEPTOR_BCR	1
		REACTOME_EXTRACELLULAR_MATRIX_ORGANIZATION	1
		REACTOME_NOTCH1_INTRACELLULAR_DOMAIN_REGULATES_TRANSCRIPTION	1
		REACTOME_PRE_NOTCH_PROCESSING_IN_GOLGI	1
		REACTOME_SIGNALING_BY_NOTCH1	1
		REACTOME_SIGNALING_BY_NOTCH3	1
		REACTOME_TRIGLYCERIDE_BIOSYNTHESIS	1
		REACTOME_INSULIN_RECEPTOR_SIGNALLING_CASCADE	1
		REACTOME_ARMS_MEDIATED_ACTIVATION	1
		REACTOME_PROLONGED_ERK_ACTIVATION_EVENTS	1
		REACTOME_SIGNALLING_TO_RAS	1
		REACTOME_SIGNALING_BY_BMP	1
		REACTOME_CELL_SURFACE_INTERACTIONS_AT_THE_VASCULAR_WALL	1
		REACTOME_NGF_SIGNALLING_VIA_TRKA_FROM_THE_PLASMA_MEMBRANE	1
		REACTOME_SIGNALLING_TO_ERKS	1
		REACTOME_P38MAPK_EVENTS	1
		REACTOME_ACYL_CHAIN_REMODELLING_OF_PI	1
		REACTOME_TGF_BETA_RECEPTOR_SIGNALING_IN_EMT_EPITHELIAL_TO_MESENCHYMAL_TRANSITION	1
		REACTOME_DOWNREGULATION_OF_TGF_BETA_RECEPTOR_SIGNALING	1
		REACTOME_COLLAGEN_FORMATION	1
		REACTOME_SMAD2_SMAD3_SMAD4_HETEROTRIMER_REGULATES_TRANSCRIPTION	1
		REACTOME_SIGNALING_BY_FGFR_IN_DISEASE	1
		REACTOME_HS_GAG_DEGRADATION	1
		REACTOME_SYNTHESIS_OF_PIPS_AT_THE_EARLY_ENDOSOME_MEMBRANE	1
		REACTOME_SIGNALLING_TO_P38_VIA_RIT_AND_RIN	1
		REACTOME_P53_INDEPENDENT_G1_S_DNA_DAMAGE_CHECKPOINT	1
		REACTOME_REGULATION_OF_HYPOXIA_INDUCIBLE_FACTOR_HIF_BY_OXYGEN	1
		REACTOME_ACYL_CHAIN_REMODELLING_OF_PC	1
		REACTOME_SYNTHESIS_OF_PIPS_AT_THE_GOLGI_MEMBRANE	1
		REACTOME_TGF_BETA_RECEPTOR_SIGNALING_ACTIVATES_SMADS	1
		REACTOME_ACTIVATED_POINT_MUTANTS_OF_FGFR2	1
		REACTOME_PHOSPHOLIPID_METABOLISM	1
		REACTOME_CS_DS_DEGRADATION	1
		REACTOME_SYNTHESIS_OF_PA	1
		REACTOME_OXYGEN_DEPENDENT_PROLINE_HYDROXYLATION_OF_HYPOXIA_INDUCIBLE_FACTOR_ALPHA	1
		REACTOME_SYNTHESIS_OF_PIPS_AT_THE_LATE_ENDOSOME_MEMBRANE	1
		REACTOME_SYNTHESIS_OF_PE	1
		REACTOME_GASTRIN_CREB_SIGNALLING_PATHWAY_VIA_PKC_AND_MAPK	1
		REACTOME_CHONDROITIN_SULFATE_BIOSYNTHESIS	1
		REACTOME_HYALURONAN_UPTAKE_AND_DEGRADATION	1
		REACTOME_SIGNALING_BY_FGFR1_MUTANTS	1
		REACTOME_SYNTHESIS_OF_PIPS_AT_THE_PLASMA_MEMBRANE	1
		REACTOME_THE_ACTIVATION_OF_ARYLSULFATASES	1
		REACTOME_TRANSCRIPTIONAL_ACTIVITY_OF_SMAD2_SMAD3_SMAD4_HETEROTRIMER	1
		REACTOME_HYALURONAN_METABOLISM	1
		REACTOME_DOWNREGULATION_OF_SMAD2_3_SMAD4_TRANSCRIPTIONAL_ACTIVITY	1
		REACTOME_KERATAN_SULFATE_BIOSYNTHESIS	1
		REACTOME_REVERSIBLE_HYDRATION_OF_CARBON_DIOXIDE	1
		REACTOME_SIGNALING_BY_FGFR1_FUSION_MUTANTS	1
		REACTOME_ALPHA_LINOLENIC_ACID_ALA_METABOLISM	1
		REACTOME_SIGNALING_BY_ACTIVATED_POINT_MUTANTS_OF_FGFR1	1
		REACTOME_PI_METABOLISM	1
		REACTOME_ABACAVIR_TRANSPORT_AND_METABOLISM	1
		REACTOME_CHONDROITIN_SULFATE_DERMATAN_SULFATE_METABOLISM	1
		REACTOME_LATENT_INFECTION_OF_HOMO_SAPIENS_WITH_MYCOBACTERIUM_TUBERCULOSIS	1
		REACTOME_SYNTHESIS_OF_PC	1
		REACTOME_HS_GAG_BIOSYNTHESIS	1
		REACTOME_SIGNALING_BY_FGFR3_MUTANTS	1
		REACTOME_KERATAN_SULFATE_KERATIN_METABOLISM	1
		REACTOME_KERATAN_SULFATE_DEGRADATION	1
		REACTOME_HEPARAN_SULFATE_HEPARIN_HS_GAG_METABOLISM	1
		REACTOME_GLYCOSAMINOGLYCAN_METABOLISM	1
		REACTOME_ACYL_CHAIN_REMODELLING_OF_PG	1
		REACTOME_ACYL_CHAIN_REMODELLING_OF_PE	1
		REACTOME_ACYL_CHAIN_REMODELLING_OF_PS	1
		REACTOME_SIGNALING_BY_FGFR_MUTANTS	1
		REACTOME_MHC_CLASS_II_ANTIGEN_PRESENTATION	1
		REACTOME_GLYCEROPHOSPHOLIPID_BIOSYNTHESIS	1
		REACTOME_A_TETRASACCHARIDE_LINKER_SEQUENCE_IS_REQUIRED_FOR_GAG_SYNTHESIS	1
		REACTOME_CDK_MEDIATED_PHOSPHORYLATION_AND_REMOVAL_OF_CDC6	1
		REACTOME_PLATELET_ADHESION_TO_EXPOSED_COLLAGEN	1
		REACTOME_VEGF_LIGAND_RECEPTOR_INTERACTIONS	1
		REACTOME_ENOS_ACTIVATION_AND_REGULATION	1
		REACTOME_MICRORNA_MIRNA_BIOGENESIS	1
		REACTOME_NUCLEAR_EVENTS_KINASE_AND_TRANSCRIPTION_FACTOR_ACTIVATION	1
		REACTOME_RETROGRADE_NEUROTROPHIN_SIGNALLING	1
		REACTOME_ERKS_ARE_INACTIVATED	1
		REACTOME_NEGATIVE_REGULATION_OF_THE_PI3K_AKT_NETWORK	1
		REACTOME_PI3K_AKT_ACTIVATION	1
		REACTOME_REGULATORY_RNA_PATHWAYS	1
		REACTOME_EGFR_DOWNREGULATION	1
		REACTOME_PROCESSING_OF_CAPPED_INTRON_CONTAINING_PRE_MRNA	1
		REACTOME_PECAM1_INTERACTIONS	1
		REACTOME_TCR_SIGNALING	1
		REACTOME_REGULATION_OF_PYRUVATE_DEHYDROGENASE_PDH_COMPLEX	1
		REACTOME_DOWNSTREAM_TCR_SIGNALING	1
		REACTOME_BASIGIN_INTERACTIONS	1
		REACTOME_AKT_PHOSPHORYLATES_TARGETS_IN_THE_CYTOSOL	1
		REACTOME_GAB1_SIGNALOSOME	1
		REACTOME_SHC1_EVENTS_IN_EGFR_SIGNALING	1
		REACTOME_ACTIVATION_OF_THE_MRNA_UPON_BINDING_OF_THE_CAP_BINDING_COMPLEX_AND_EIFS_AND_SUBSEQUENT_BINDING_TO_43S	1
		REACTOME_PHOSPHORYLATION_OF_CD3_AND_TCR_ZETA_CHAINS	1
		REACTOME_GLUTAMATE_NEUROTRANSMITTER_RELEASE_CYCLE	1
		REACTOME_TRANSLOCATION_OF_ZAP_70_TO_IMMUNOLOGICAL_SYNAPSE	1
		REACTOME_ERK_MAPK_TARGETS	1
		REACTOME_TIE2_SIGNALING	1
		REACTOME_GENERATION_OF_SECOND_MESSENGER_MOLECULES	1
		REACTOME_GENERIC_TRANSCRIPTION_PATHWAY	1
		REACTOME_RESPONSE_TO_ELEVATED_PLATELET_CYTOSOLIC_CA2_	1
		REACTOME_METABOLISM_OF_AMINO_ACIDS_AND_DERIVATIVES	1
		REACTOME_RNA_POL_I_TRANSCRIPTION	1
		REACTOME_FATTY_ACYL_COA_BIOSYNTHESIS	1
		REACTOME_E2F_ENABLED_INHIBITION_OF_PRE_REPLICATION_COMPLEX_FORMATION	1
		REACTOME_P75NTR_RECRUITS_SIGNALLING_COMPLEXES	1
		REACTOME_BIOLOGICAL_OXIDATIONS	1
		REACTOME_REGULATED_PROTEOLYSIS_OF_P75NTR	1
		REACTOME_TRANSMISSION_ACROSS_CHEMICAL_SYNAPSES	1
		REACTOME_P75NTR_SIGNALS_VIA_NFKB	1
		REACTOME_CASPASE_MEDIATED_CLEAVAGE_OF_CYTOSKELETAL_PROTEINS	1
		REACTOME_XENOBIOTICS	1
		REACTOME_INTEGRIN_CELL_SURFACE_INTERACTIONS	1
		REACTOME_REGULATION_OF_ORNITHINE_DECARBOXYLASE_ODC	1
		REACTOME_CYTOCHROME_P450_ARRANGED_BY_SUBSTRATE_TYPE	1
		REACTOME_BASE_FREE_SUGAR_PHOSPHATE_REMOVAL_VIA_THE_SINGLE_NUCLEOTIDE_REPLACEMENT_PATHWAY	1
		REACTOME_APOPTOTIC_CLEAVAGE_OF_CELL_ADHESION_PROTEINS	1
		REACTOME_HDL_MEDIATED_LIPID_TRANSPORT	1
		REACTOME_NRAGE_SIGNALS_DEATH_THROUGH_JNK	1
		REACTOME_SLBP_DEPENDENT_PROCESSING_OF_REPLICATION_DEPENDENT_HISTONE_PRE_MRNAS	1
		REACTOME_NRIF_SIGNALS_CELL_DEATH_FROM_THE_NUCLEUS	1
		REACTOME_REGULATION_OF_APOPTOSIS	1
		REACTOME_RNA_POL_II_TRANSCRIPTION	1
		REACTOME_NEURONAL_SYSTEM	1
		REACTOME_NFKB_IS_ACTIVATED_AND_SIGNALS_SURVIVAL	1
		REACTOME_REGULATION_OF_BETA_CELL_DEVELOPMENT	1
		REACTOME_PHASE1_FUNCTIONALIZATION_OF_COMPOUNDS	1
		REACTOME_RNA_POL_III_TRANSCRIPTION	1
		REACTOME_CELL_DEATH_SIGNALLING_VIA_NRAGE_NRIF_AND_NADE	1
		REACTOME_NEUROTRANSMITTER_RELEASE_CYCLE	1
		REACTOME_P75_NTR_RECEPTOR_MEDIATED_SIGNALLING	1
		REACTOME_AMINO_ACID_TRANSPORT_ACROSS_THE_PLASMA_MEMBRANE	1
		REACTOME_ENDOGENOUS_STEROLS	1
		REACTOME_REGULATION_OF_GENE_EXPRESSION_IN_BETA_CELLS	1
		REACTOME_GLYCOLYSIS	1
		REACTOME_PROCESSIVE_SYNTHESIS_ON_THE_LAGGING_STRAND	1
		REACTOME_PEPTIDE_CHAIN_ELONGATION	1
		REACTOME_COMMON_PATHWAY	1
		REACTOME_MRNA_CAPPING	1
		REACTOME_MITOCHONDRIAL_FATTY_ACID_BETA_OXIDATION	1
		REACTOME_SIGNALING_BY_GPCR	1
		REACTOME_PEPTIDE_LIGAND_BINDING_RECEPTORS	1
		REACTOME_METABOLISM_OF_POLYAMINES	1
		REACTOME_CLASS_A1_RHODOPSIN_LIKE_RECEPTORS	1
		REACTOME_NOTCH_HLH_TRANSCRIPTION_PATHWAY	1
		REACTOME_INTEGRATION_OF_ENERGY_METABOLISM	1
		REACTOME_CELL_CYCLE_MITOTIC	1
		REACTOME_GLUCONEOGENESIS	1
		REACTOME_DOPAMINE_NEUROTRANSMITTER_RELEASE_CYCLE	1
		REACTOME_OPIOID_SIGNALLING	1
		REACTOME_RECRUITMENT_OF_MITOTIC_CENTROSOME_PROTEINS_AND_COMPLEXES	1
		REACTOME_MITOCHONDRIAL_TRNA_AMINOACYLATION	1
		REACTOME_CYTOSOLIC_TRNA_AMINOACYLATION	1
		REACTOME_CA_DEPENDENT_EVENTS	1
		REACTOME_ACETYLCHOLINE_NEUROTRANSMITTER_RELEASE_CYCLE	1
		REACTOME_ADENYLATE_CYCLASE_ACTIVATING_PATHWAY	1
		REACTOME_ADENYLATE_CYCLASE_INHIBITORY_PATHWAY	1
		REACTOME_DARPP_32_EVENTS	1
		REACTOME_CHEMOKINE_RECEPTORS_BIND_CHEMOKINES	1
		REACTOME_LOSS_OF_NLP_FROM_MITOTIC_CENTROSOMES	1
		REACTOME_NEUROTRANSMITTER_RECEPTOR_BINDING_AND_DOWNSTREAM_TRANSMISSION_IN_THE_POSTSYNAPTIC_CELL	1
		REACTOME_CELL_CYCLE_CHECKPOINTS	1
		REACTOME_P130CAS_LINKAGE_TO_MAPK_SIGNALING_FOR_INTEGRINS	1
		REACTOME_GLYCOPROTEIN_HORMONES	1
		REACTOME_NOREPINEPHRINE_NEUROTRANSMITTER_RELEASE_CYCLE	1
		REACTOME_PLC_BETA_MEDIATED_EVENTS	1
		REACTOME_GRB2_SOS_PROVIDES_LINKAGE_TO_MAPK_SIGNALING_FOR_INTERGRINS_	1
		REACTOME_PEPTIDE_HORMONE_BIOSYNTHESIS	1
		REACTOME_G_PROTEIN_ACTIVATION	1
		REACTOME_ACETYLCHOLINE_BINDING_AND_DOWNSTREAM_EVENTS	1
		REACTOME_ABC_FAMILY_PROTEINS_MEDIATED_TRANSPORT	1
		REACTOME_TRNA_AMINOACYLATION	1
		REACTOME_OLFACTORY_SIGNALING_PATHWAY	1
		REACTOME_STEROID_HORMONES	1
		REACTOME_PKA_MEDIATED_PHOSPHORYLATION_OF_CREB	1
		REACTOME_RECRUITMENT_OF_NUMA_TO_MITOTIC_CENTROSOMES	1
		REACTOME_AMINE_DERIVED_HORMONES	1
		REACTOME_TRANSMEMBRANE_TRANSPORT_OF_SMALL_MOLECULES	1
		REACTOME_INTEGRIN_ALPHAIIB_BETA3_SIGNALING	1
		REACTOME_INSULIN_SYNTHESIS_AND_PROCESSING	1
		REACTOME_CYCLIN_E_ASSOCIATED_EVENTS_DURING_G1_S_TRANSITION_	1
		REACTOME_HOMOLOGOUS_RECOMBINATION_REPAIR_OF_REPLICATION_INDEPENDENT_DOUBLE_STRAND_BREAKS	1
		REACTOME_G1_PHASE	1
		REACTOME_ELEVATION_OF_CYTOSOLIC_CA2_LEVELS	1
		REACTOME_P53_DEPENDENT_G1_DNA_DAMAGE_RESPONSE	1
		REACTOME_TRANSCRIPTION_COUPLED_NER_TC_NER	1
		REACTOME_RNA_POL_II_TRANSCRIPTION_PRE_INITIATION_AND_PROMOTER_OPENING	1
		REACTOME_GLUCAGON_SIGNALING_IN_METABOLIC_REGULATION	1
		REACTOME_MRNA_PROCESSING	1
		REACTOME_SIGNALING_BY_PDGF	1
		REACTOME_ASSOCIATION_OF_TRIC_CCT_WITH_TARGET_PROTEINS_DURING_BIOSYNTHESIS	1
		REACTOME_PREFOLDIN_MEDIATED_TRANSFER_OF_SUBSTRATE_TO_CCT_TRIC	1
		REACTOME_HORMONE_LIGAND_BINDING_RECEPTORS	1
		REACTOME_GPVI_MEDIATED_ACTIVATION_CASCADE	1
		REACTOME_PROTEIN_FOLDING	1
		REACTOME_FORMATION_OF_TUBULIN_FOLDING_INTERMEDIATES_BY_CCT_TRIC	1
		REACTOME_PEROXISOMAL_LIPID_METABOLISM	1
		REACTOME_POST_CHAPERONIN_TUBULIN_FOLDING_PATHWAY	1
		REACTOME_STRIATED_MUSCLE_CONTRACTION	1
		REACTOME_METABOLISM_OF_NUCLEOTIDES	1
		REACTOME_AMINE_LIGAND_BINDING_RECEPTORS	1
		REACTOME_METABOLISM_OF_PROTEINS	1
		REACTOME_DOWNSTREAM_SIGNAL_TRANSDUCTION	1
		REACTOME_MUSCLE_CONTRACTION	1
		REACTOME_SEROTONIN_RECEPTORS	1
		REACTOME_CDC6_ASSOCIATION_WITH_THE_ORC_ORIGIN_COMPLEX	1
		REACTOME_M_G1_TRANSITION	1
		REACTOME_MRNA_SPLICING	1
		REACTOME_MRNA_SPLICING_MINOR_PATHWAY	1
		REACTOME_3_UTR_MEDIATED_TRANSLATIONAL_REGULATION	1
		REACTOME_PROCESSING_OF_CAPPED_INTRONLESS_PRE_MRNA	1
		REACTOME_PURINE_RIBONUCLEOSIDE_MONOPHOSPHATE_BIOSYNTHESIS	1
		REACTOME_G1_S_TRANSITION	1
		REACTOME_CITRIC_ACID_CYCLE_TCA_CYCLE	1
		REACTOME_TRANSCRIPTION	1
		REACTOME_POL_SWITCHING	1
		REACTOME_NUCLEOTIDE_EXCISION_REPAIR	1
		REACTOME_REGULATION_OF_THE_FANCONI_ANEMIA_PATHWAY	1
		REACTOME_AXON_GUIDANCE	1
		REACTOME_ACTIVATION_OF_CHAPERONE_GENES_BY_XBP1S	1
		REACTOME_REGULATION_OF_INSULIN_SECRETION_BY_GLUCAGON_LIKE_PEPTIDE1	1
		REACTOME_PERK_REGULATED_GENE_EXPRESSION	1
		REACTOME_G_ALPHA_Q_SIGNALLING_EVENTS	1
		REACTOME_P2Y_RECEPTORS	1
		REACTOME_TRAFFICKING_OF_AMPA_RECEPTORS	1
		REACTOME_NCAM1_INTERACTIONS	1
		REACTOME_CLASS_C_3_METABOTROPIC_GLUTAMATE_PHEROMONE_RECEPTORS	1
		REACTOME_REGULATION_OF_INSULIN_SECRETION	1
		REACTOME_NCAM_SIGNALING_FOR_NEURITE_OUT_GROWTH	1
		REACTOME_INHIBITION_OF_INSULIN_SECRETION_BY_ADRENALINE_NORADRENALINE	1
		REACTOME_NUCLEOTIDE_LIKE_PURINERGIC_RECEPTORS	1
		REACTOME_TRANSPORT_OF_MATURE_MRNA_DERIVED_FROM_AN_INTRONLESS_TRANSCRIPT	1
		REACTOME_EICOSANOID_LIGAND_BINDING_RECEPTORS	1
		REACTOME_ACTIVATION_OF_GENES_BY_ATF4	1
		REACTOME_UNFOLDED_PROTEIN_RESPONSE	1
		REACTOME_CLASS_B_2_SECRETIN_FAMILY_RECEPTORS	1
		REACTOME_GLUCAGON_TYPE_LIGAND_RECEPTORS	1
		REACTOME_REGULATION_OF_INSULIN_SECRETION_BY_ACETYLCHOLINE	1
		REACTOME_G_ALPHA1213_SIGNALLING_EVENTS	1
		REACTOME_FANCONI_ANEMIA_PATHWAY	1
		REACTOME_TRAFFICKING_OF_GLUR2_CONTAINING_AMPA_RECEPTORS	1
		REACTOME_PROSTANOID_LIGAND_RECEPTORS	1
		REACTOME_OPSINS	1
		REACTOME_FORMATION_OF_RNA_POL_II_ELONGATION_COMPLEX_	1
		REACTOME_POST_TRANSLATIONAL_MODIFICATION_SYNTHESIS_OF_GPI_ANCHORED_PROTEINS	1
		REACTOME_CYCLIN_A_B1_ASSOCIATED_EVENTS_DURING_G2_M_TRANSITION	1
		REACTOME_ELONGATION_ARREST_AND_RECOVERY	1
		REACTOME_SLC_MEDIATED_TRANSMEMBRANE_TRANSPORT	1
		REACTOME_ADP_SIGNALLING_THROUGH_P2RY1	1
		REACTOME_G_BETA_GAMMA_SIGNALLING_THROUGH_PLC_BETA	1
		REACTOME_CD28_CO_STIMULATION	1
		REACTOME_GPCR_DOWNSTREAM_SIGNALING	1
		REACTOME_SYNTHESIS_SECRETION_AND_DEACYLATION_OF_GHRELIN	1
		REACTOME_ADHERENS_JUNCTIONS_INTERACTIONS	1
		REACTOME_CRMPS_IN_SEMA3A_SIGNALING	1
		REACTOME_OTHER_SEMAPHORIN_INTERACTIONS	1
		REACTOME_ACTIVATION_OF_RAC	1
		REACTOME_PURINE_SALVAGE	1
		REACTOME_G_ALPHA_I_SIGNALLING_EVENTS	1
		REACTOME_SEMA3A_PAK_DEPENDENT_AXON_REPULSION	1
		REACTOME_CD28_DEPENDENT_VAV1_PATHWAY	1
		REACTOME_SEMA4D_IN_SEMAPHORIN_SIGNALING	1
		REACTOME_SEMAPHORIN_INTERACTIONS	1
		REACTOME_SEMA4D_INDUCED_CELL_MIGRATION_AND_GROWTH_CONE_COLLAPSE	1
		REACTOME_SEMA3A_PLEXIN_REPULSION_SIGNALING_BY_INHIBITING_INTEGRIN_ADHESION	1
		REACTOME_LYSOSOME_VESICLE_BIOGENESIS	1
		REACTOME_G_BETA_GAMMA_SIGNALLING_THROUGH_PI3KGAMMA	1
		REACTOME_TRANSPORT_OF_GLUCOSE_AND_OTHER_SUGARS_BILE_SALTS_AND_ORGANIC_ACIDS_METAL_IONS_AND_AMINE_COMPOUNDS	1
		REACTOME_SPHINGOLIPID_METABOLISM	1
		REACTOME_PD1_SIGNALING	1
		REACTOME_G_ALPHA_S_SIGNALLING_EVENTS	1
		REACTOME_CELL_CELL_JUNCTION_ORGANIZATION	1
		REACTOME_G_ALPHA_Z_SIGNALLING_EVENTS	1
		REACTOME_FACILITATIVE_NA_INDEPENDENT_GLUCOSE_TRANSPORTERS	1
		REACTOME_COSTIMULATION_BY_THE_CD28_FAMILY	1
		REACTOME_SIGNALING_BY_ROBO_RECEPTOR	1
		REACTOME_CD28_DEPENDENT_PI3K_AKT_SIGNALING	1
		REACTOME_TIGHT_JUNCTION_INTERACTIONS	1
		REACTOME_G_PROTEIN_BETA_GAMMA_SIGNALLING	1
		REACTOME_TRANSPORT_OF_INORGANIC_CATIONS_ANIONS_AND_AMINO_ACIDS_OLIGOPEPTIDES	1
		REACTOME_GOLGI_ASSOCIATED_VESICLE_BIOGENESIS	1
		REACTOME_CTLA4_INHIBITORY_SIGNALING	1
		REACTOME_FORMATION_OF_TRANSCRIPTION_COUPLED_NER_TC_NER_REPAIR_COMPLEX	1
		REACTOME_AMINO_ACID_AND_OLIGOPEPTIDE_SLC_TRANSPORTERS	1
		REACTOME_CDT1_ASSOCIATION_WITH_THE_CDC6_ORC_ORIGIN_COMPLEX	1
		REACTOME_BRANCHED_CHAIN_AMINO_ACID_CATABOLISM	1
		REACTOME_REPAIR_SYNTHESIS_FOR_GAP_FILLING_BY_DNA_POL_IN_TC_NER	1
		REACTOME_RECEPTOR_LIGAND_BINDING_INITIATES_THE_SECOND_PROTEOLYTIC_CLEAVAGE_OF_NOTCH_RECEPTOR	1
		REACTOME_SYNTHESIS_OF_DNA	1
		REACTOME_NA_CL_DEPENDENT_NEUROTRANSMITTER_TRANSPORTERS	1
		REACTOME_FORMATION_OF_FIBRIN_CLOT_CLOTTING_CASCADE	1
		REACTOME_DEADENYLATION_OF_MRNA	1
		REACTOME_MRNA_DECAY_BY_5_TO_3_EXORIBONUCLEASE	1
		REACTOME_SIGNAL_AMPLIFICATION	1
		REACTOME_ZINC_TRANSPORTERS	1
		REACTOME_DOUBLE_STRAND_BREAK_REPAIR	1
		REACTOME_RAS_ACTIVATION_UOPN_CA2_INFUX_THROUGH_NMDA_RECEPTOR	1
		REACTOME_METAL_ION_SLC_TRANSPORTERS	1
		REACTOME_AUTODEGRADATION_OF_THE_E3_UBIQUITIN_LIGASE_COP1	1
		REACTOME_SMOOTH_MUSCLE_CONTRACTION	1
		REACTOME_ACTIVATION_OF_NMDA_RECEPTOR_UPON_GLUTAMATE_BINDING_AND_POSTSYNAPTIC_EVENTS	1
		REACTOME_CREB_PHOSPHORYLATION_THROUGH_THE_ACTIVATION_OF_RAS	1
		REACTOME_POST_NMDA_RECEPTOR_ACTIVATION_EVENTS	1
		REACTOME_UNBLOCKING_OF_NMDA_RECEPTOR_GLUTAMATE_BINDING_AND_ACTIVATION	1
		REACTOME_METABOLISM_OF_MRNA	1
		REACTOME_MRNA_DECAY_BY_3_TO_5_EXORIBONUCLEASE	1
		REACTOME_BILE_SALT_AND_ORGANIC_ANION_SLC_TRANSPORTERS	1
		REACTOME_DEADENYLATION_DEPENDENT_MRNA_DECAY	1
		REACTOME_CREB_PHOSPHORYLATION_THROUGH_THE_ACTIVATION_OF_CAMKII	1
		REACTOME_THROMBOXANE_SIGNALLING_THROUGH_TP_RECEPTOR	1
		REACTOME_CELL_EXTRACELLULAR_MATRIX_INTERACTIONS	1
		REACTOME_ADP_SIGNALLING_THROUGH_P2RY12	1
		REACTOME_CELL_JUNCTION_ORGANIZATION	1
		REACTOME_AMINE_COMPOUND_SLC_TRANSPORTERS	1
		REACTOME_PYRUVATE_METABOLISM	1
		REACTOME_PURINE_CATABOLISM	1
		REACTOME_GLUCOSE_TRANSPORT	1
		REACTOME_FRS2_MEDIATED_CASCADE	1
		REACTOME_METABOLISM_OF_RNA	1
		REACTOME_MITOTIC_G1_G1_S_PHASES	1
		REACTOME_PI_3K_CASCADE	1
		REACTOME_DOWNSTREAM_SIGNALING_OF_ACTIVATED_FGFR	1
		REACTOME_REGULATION_OF_MITOTIC_CELL_CYCLE	1
		REACTOME_TAK1_ACTIVATES_NFKB_BY_PHOSPHORYLATION_AND_ACTIVATION_OF_IKKS_COMPLEX	1
		REACTOME_REGULATION_OF_AMPK_ACTIVITY_VIA_LKB1	1
		REACTOME_MITOTIC_M_M_G1_PHASES	1
		REACTOME_MYOGENESIS	1
		REACTOME_MAP_KINASE_ACTIVATION_IN_TLR_CASCADE	1
		REACTOME_PHOSPHOLIPASE_C_MEDIATED_CASCADE	1
		REACTOME_ACTIVATION_OF_KAINATE_RECEPTORS_UPON_GLUTAMATE_BINDING	1
		REACTOME_IONOTROPIC_ACTIVITY_OF_KAINATE_RECEPTORS	1
		REACTOME_ACTIVATION_OF_THE_AP1_FAMILY_OF_TRANSCRIPTION_FACTORS	1
		REACTOME_MAPK_TARGETS_NUCLEAR_EVENTS_MEDIATED_BY_MAP_KINASES	1
		REACTOME_SYNTHESIS_AND_INTERCONVERSION_OF_NUCLEOTIDE_DI_AND_TRIPHOSPHATES	1
		REACTOME_GPCR_LIGAND_BINDING	1
		REACTOME_RNA_POL_I_RNA_POL_III_AND_MITOCHONDRIAL_TRANSCRIPTION	1
		REACTOME_JNK_C_JUN_KINASES_PHOSPHORYLATION_AND_ACTIVATION_MEDIATED_BY_ACTIVATED_HUMAN_TAK1	1
		REACTOME_SHC_MEDIATED_CASCADE	1
		REACTOME_THROMBIN_SIGNALLING_THROUGH_PROTEINASE_ACTIVATED_RECEPTORS_PARS	1
		REACTOME_ENERGY_DEPENDENT_REGULATION_OF_MTOR_BY_LKB1_AMPK	1
		REACTOME_MITOTIC_G2_G2_M_PHASES	1
		REACTOME_REGULATION_OF_RHEB_GTPASE_ACTIVITY_BY_AMPK	1
		REACTOME_ACTIVATED_TAK1_MEDIATES_P38_MAPK_ACTIVATION	1
		REACTOME_DNA_REPAIR	1
		REACTOME_EFFECTS_OF_PIP2_HYDROLYSIS	1
		REACTOME_RNA_POL_II_PRE_TRANSCRIPTION_EVENTS	1
		REACTOME_ROLE_OF_DCC_IN_REGULATING_APOPTOSIS	1
		REACTOME_POST_TRANSLATIONAL_PROTEIN_MODIFICATION	1
		REACTOME_CHROMOSOME_MAINTENANCE	1
		REACTOME_DEPOSITION_OF_NEW_CENPA_CONTAINING_NUCLEOSOMES_AT_THE_CENTROMERE	1
		REACTOME_L1CAM_INTERACTIONS	1
		REACTOME_ROLE_OF_SECOND_MESSENGERS_IN_NETRIN1_SIGNALING	1
		REACTOME_SIGNALING_BY_ILS	1
		REACTOME_NETRIN1_SIGNALING	1
		REACTOME_METABOLISM_OF_LIPIDS_AND_LIPOPROTEINS	1
		REACTOME_INTERACTION_BETWEEN_L1_AND_ANKYRINS	1
		REACTOME_SIGNAL_TRANSDUCTION_BY_L1	1
		REACTOME_FATTY_ACID_TRIACYLGLYCEROL_AND_KETONE_BODY_METABOLISM	1
		REACTOME_TRANSPORT_OF_VITAMINS_NUCLEOSIDES_AND_RELATED_MOLECULES	1
		REACTOME_HIGHLY_CALCIUM_PERMEABLE_POSTSYNAPTIC_NICOTINIC_ACETYLCHOLINE_RECEPTORS	1
		REACTOME_PRESYNAPTIC_NICOTINIC_ACETYLCHOLINE_RECEPTORS	1
		REACTOME_ORGANIC_CATION_ANION_ZWITTERION_TRANSPORT	1
		REACTOME_DCC_MEDIATED_ATTRACTIVE_SIGNALING	1
		REACTOME_RECYCLING_PATHWAY_OF_L1	1
		REACTOME_SYNTHESIS_OF_SUBSTRATES_IN_N_GLYCAN_BIOSYTHESIS	1
		REACTOME_RESPIRATORY_ELECTRON_TRANSPORT	1
		REACTOME_ASPARAGINE_N_LINKED_GLYCOSYLATION	1
		REACTOME_ASSEMBLY_OF_THE_PRE_REPLICATIVE_COMPLEX	1
		REACTOME_BIOSYNTHESIS_OF_THE_N_GLYCAN_PRECURSOR_DOLICHOL_LIPID_LINKED_OLIGOSACCHARIDE_LLO_AND_TRANSFER_TO_A_NASCENT_PROTEIN	1
		REACTOME_IL1_SIGNALING	1
		REACTOME_GLOBAL_GENOMIC_NER_GG_NER	1
		REACTOME_CGMP_EFFECTS	1
		REACTOME_REGULATION_OF_SIGNALING_BY_CBL	1
		REACTOME_AMINO_ACID_SYNTHESIS_AND_INTERCONVERSION_TRANSAMINATION	1
		REACTOME_CALNEXIN_CALRETICULIN_CYCLE	1
		REACTOME_SYNTHESIS_SECRETION_AND_INACTIVATION_OF_GIP	1
		REACTOME_PASSIVE_TRANSPORT_BY_AQUAPORINS	1
		REACTOME_NEPHRIN_INTERACTIONS	1
		REACTOME_IL_3_5_AND_GM_CSF_SIGNALING	1
		REACTOME_NITRIC_OXIDE_STIMULATES_GUANYLATE_CYCLASE	1
		REACTOME_PLATELET_HOMEOSTASIS	1
		REACTOME_N_GLYCAN_TRIMMING_IN_THE_ER_AND_CALNEXIN_CALRETICULIN_CYCLE	1
		REACTOME_PLATELET_SENSITIZATION_BY_LDL	1
		REACTOME_AQUAPORIN_MEDIATED_TRANSPORT	1
		REACTOME_IL_RECEPTOR_SHC_SIGNALING	1
		REACTOME_RAP1_SIGNALLING	1
		REACTOME_PLATELET_CALCIUM_HOMEOSTASIS	1
		REACTOME_SIGNAL_REGULATORY_PROTEIN_SIRP_FAMILY_INTERACTIONS	1
		REACTOME_PROSTACYCLIN_SIGNALLING_THROUGH_PROSTACYCLIN_RECEPTOR	1
		REACTOME_GABA_SYNTHESIS_RELEASE_REUPTAKE_AND_DEGRADATION	1
		REACTOME_INCRETIN_SYNTHESIS_SECRETION_AND_INACTIVATION	1
		REACTOME_TRANSPORT_OF_ORGANIC_ANIONS	1
		REACTOME_SYNTHESIS_SECRETION_AND_INACTIVATION_OF_GLP1	1
		REACTOME_REGULATION_OF_WATER_BALANCE_BY_RENAL_AQUAPORINS	1
		REACTOME_DESTABILIZATION_OF_MRNA_BY_BRF1	1
		REACTOME_IRAK1_RECRUITS_IKK_COMPLEX	1
		REACTOME_TRAF6_MEDIATED_IRF7_ACTIVATION	1
		REACTOME_TRAF6_MEDIATED_NFKB_ACTIVATION	1
		REACTOME_FACTORS_INVOLVED_IN_MEGAKARYOCYTE_DEVELOPMENT_AND_PLATELET_PRODUCTION	1
		REACTOME_REGULATION_OF_IFNG_SIGNALING	1
		REACTOME_GABA_A_RECEPTOR_ACTIVATION	1
		REACTOME_REGULATION_OF_MRNA_STABILITY_BY_PROTEINS_THAT_BIND_AU_RICH_ELEMENTS	1
		REACTOME_INHIBITION_OF_VOLTAGE_GATED_CA2_CHANNELS_VIA_GBETA_GAMMA_SUBUNITS	1
		REACTOME_IRAK2_MEDIATED_ACTIVATION_OF_TAK1_COMPLEX_UPON_TLR7_8_OR_9_STIMULATION	1
		REACTOME_TRAF6_MEDIATED_INDUCTION_OF_NFKB_AND_MAP_KINASES_UPON_TLR7_8_OR_9_ACTIVATION	1
		REACTOME_TRAF3_DEPENDENT_IRF_ACTIVATION_PATHWAY	1
		REACTOME_GABA_B_RECEPTOR_ACTIVATION	1
		REACTOME_NFKB_ACTIVATION_THROUGH_FADD_RIP1_PATHWAY_MEDIATED_BY_CASPASE_8_AND10	1
		REACTOME_DESTABILIZATION_OF_MRNA_BY_KSRP	1
		REACTOME_TRANSPORT_TO_THE_GOLGI_AND_SUBSEQUENT_MODIFICATION	1
		REACTOME_IRON_UPTAKE_AND_TRANSPORT	1
		REACTOME_DESTABILIZATION_OF_MRNA_BY_TRISTETRAPROLIN_TTP	1
		REACTOME_INTERFERON_GAMMA_SIGNALING	1
		REACTOME_N_GLYCAN_ANTENNAE_ELONGATION	1
		REACTOME_TRAF6_MEDIATED_IRF7_ACTIVATION_IN_TLR7_8_OR_9_SIGNALING	1
[truncated: 145 more rows]

## Sheet: Supplementary Table 6
TNF pathway genes up-regulated by CytoMix		TNF pathway genes up-regulated by MSCs		TNF pathway genes up-regulated by both CytoMix and by MSCs
[truncated: 79 more rows]

[truncated: 2 more sheets: Supplementary Table 7, Supplementary Table 8]
